# Supplementary material
Source: PubMed Central journal article supplement (PMC4342547)
Supplement: NIHMS62121-supplement-supplementary_4.pdf [file NIHMS62121-supplement-supplementary_4.pdf]

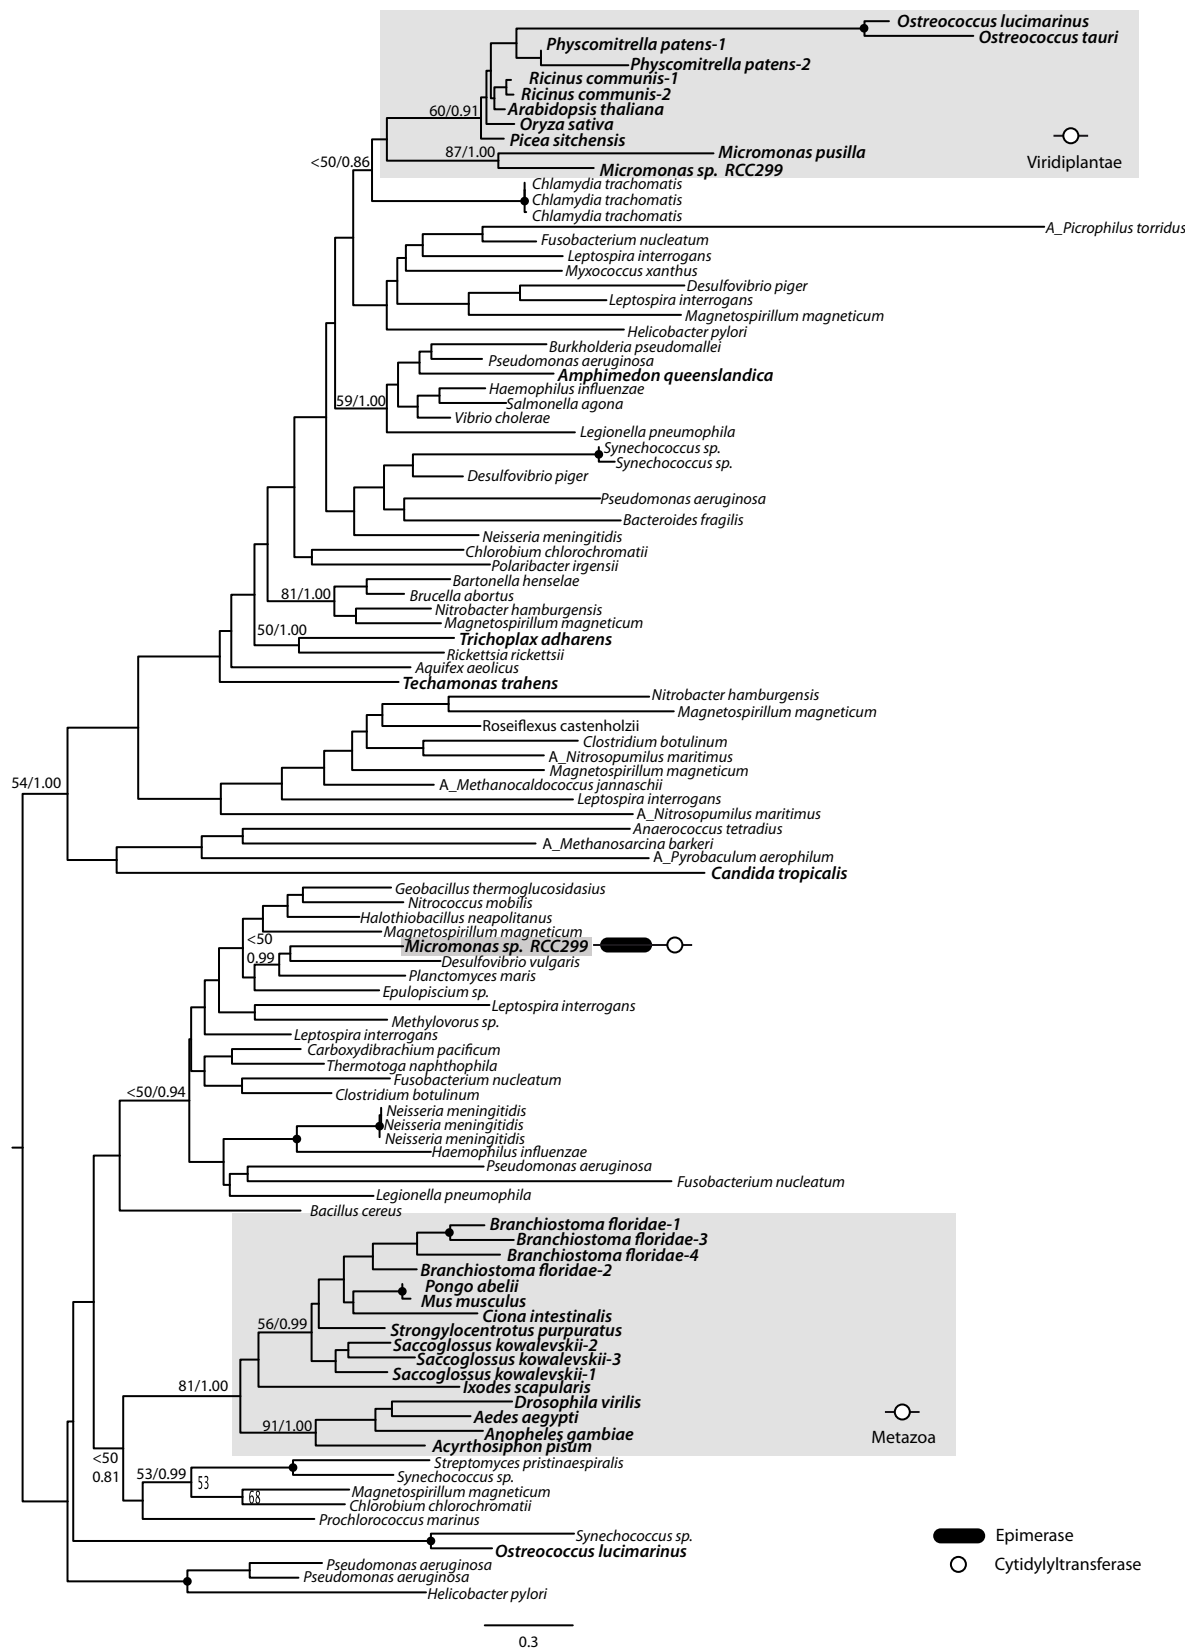

**Figure S3.** Maximum likelihood (ML) phylogenetic tree of the Cytidylyltransferase domain as obtained by RAxML (WAG +  $\Gamma$  + I). The tree is rooted using the midpoint-rooted tree option. Statistical support was obtained by RAxML 100-bootstrap replicates (BV) and Bayesian Posterior Probabilities (PP). Both values are shown on key branches. A black dot in a node indicates BV > 95% and PP > 0.95. Eukaryotes are shown in bold. “A\_” indicates Archaeal sequences. Characteristic domain architecture shown in key taxa.
