# Supplementary material
Source: PubMed Central journal article supplement (PMC4342547)
Supplement: NIHMS62121-supplement-supplementary_material_1.pdf [file NIHMS62121-supplement-supplementary_material_1.pdf]

## Epimerase sequences

>B\_DELTA gi|218779508|ref|YP\_002430826.1| UDP-N-acetylglucosamine 2-epimerase [Desulfatibacillum alkenivorans AK-01]

MKLCLVITTRGNyakvksiiQAAENDPDVELQIIVGGGAILAKYGNIADSLTTMGVNVDRRIHFLVEG  
ETPVTMAKSAGLAVSEFTTAFENLQPDVVMVIADRFECLSIAMTASYMNIPVAHMEGGEVSGSIDESI  
RHAITKLSHVHFPATQEAADRIIRMGEAPETVFPVGATSLDVIAGLDLNLPIMEKQASAGVGARV  
DLTQPYLTVIQHPVTTEYAENLEHVNQTLNAIHELGMGTIWIWPNMDAGSDGISKGIRIFREKHVDA  
PMHFFKSLPIEHYAPLLKNAQAIVGNSSSGIREAAFLGTPCVNIIGSRQSGRDRSVNIIDVGYDKAEIKA  
AIKQLDHGRYEENHMWGDGKAGPKILDVLKTFDFTIQKRICY

>B\_DELTA\_2 gi|148266095|ref|YP\_001232801.1| UDP-N-acetylglucosamine 2-epimerase [Geobacter uraniiireducens Rf4]

MTRRRICVVTGTRADYGLLYRLMKEIEGDPDLQLQVVATGMHLSPEFGLTYRDIETDGFTIHERVEM  
LLSSDTPVGIAKSIGLVIGFADAFERLRPEIIVLLGDRFEMLAAAQAALVGRIPVAHIAGGDTTEGAF  
DEAIRHSITKMSHCHFVTNEAALHRVRQLGENPDAVHLVGSPIGIDQIRRLTLLSRHELERDLGLAFRK  
RNLLVTFHPATLDEVSASEQMQUALFDALDRLGPEVGIILTKPNADTGGRRLSMDIDVYVSERDQAKA  
FTSLGQLRYLSLIPQVDAVGNSSSGLYEAPSFKPTVNIGDRQKGRQLQASSVINCAPVADDILQAVR  
AAFGLDCSTAVNPYGDGNASSRIAAILKGLPEPRRLIKKHFFDLNG

>B\_DELTA\_4 gi|303247652|ref|ZP\_07333922.1| UDP-N-acetyl-D-glucosamine 2-epimerase, UDP-hydrolysing [Desulfovibrio fructosovorans JJ]

MDSRLKICIVTGSRAEYGLLYWLLKDIAADPDLKLQIIATGMHLSPEFGLTYRQIEVDGFTIDAKVEM  
LLSADTPVAVTKSMGLGVIGFADALDRLAPDIIIIVLGDRFEIFAAAQAAMVARIPLAHIHGGGETSEGAY  
DEGIRHAISKMAQWHFVATEPYRQRVVQLGEAPQRVFNVGAPGLDHLSTRTQLLTREELEQVLDMLR  
RQPLFVVTYHPVTLGMDSPEKAMKELIAGLRKFEDASIVFTYPNADSGGRALRQIINSFVAEDLQRIR  
AYTSLGQQRYLSLIRQADVIVGNSSSGLIEAPALKTATVNIGDRQKGRLLKASSVIDASEHRTDIAKAIR  
HALSPEFRIQLLQTSLYGCGDASASILRQLKAPLPTIQKSFFDIKHKY

>B\_ALPHA gi|86748660|ref|YP\_485156.1| UDP-N-acetylglucosamine 2-epimerase [Rhodopseudomonas palustris HaA2]

MTKRKICVVVGSRANYSSIKSAMRAIQDHPALELQLIVAASAVLDRYGSVVNLIKDGFRPHARVTM  
LIEGETPATMAKSTGLGLIELPTLFEQLGPDVVLTVGDRFETMATTLAAAYMNIPVAHTMGGEVSGTI  
DESIRHAVTKFAHIHFASQGAARIKLGELPRHVHMVGCPRIDLVAEILGRSSGGLDAGLFDLGVG  
QQFSVDEPFALVSQHPVTTEYGTGEAQITLTLEAVREQGLAAIVLWPNADAGSDDISRGIRKWRERK  
LDDRMHFFKNLPIETYVNLMRSAACLVGNSSSGIREGAYIGTPVVNIGTRQHMRDRGDNVIDVGYD  
KKQISDAIARQVEHGRYAMDPIYGDGTAGTKIADILVTERVDVQKCITY

>B\_ALPHA\_2 gi|103487060|ref|YP\_616621.1| UDP-N-acetylglucosamine 2-epimerase [Sphingopyxis alaskensis RB2256]

MTSPKRIVYLTGTRADFGMLMPLTLRAIDRSPHLELELLVTGMHLSDRFGRTEREVEAAGLKIGRRIPV  
PIDDDSGHGMGVSTGLITCAVADYLAETACDVLLLLGDRGEMLAATAAGLFADVPIVHVAGGDRSG  
SVDESIRHAISKLAHIHCVSNEDARQLRIRMGEDPDRIFDVGAPGLVGLKKPDRATAAMVRNRYGID  
DEESFVVLVLFHPVVQAAEAGAQRAMFDALAGLPFRYVALMPNADHGTTISRTEIEMRDAGQL  
TTIDHMPRADYLALLAECRFLIGNSSSGIVEAATFGTPVVNVGDRQFGRLRSANVFDAPPESGAIGRA  
IEKAIGFDPQGLRNVYGDPHADIRICEILEKTDFASALRMKTISY

>B\_ALPHA\_3 gi|294678483|ref|YP\_003579098.1| UDP-N-acetylglucosamine 2-epimerase [Rhodobacter capsulatus SB 1003]

MTREILFVTGTRADFGKIEPLALAARDRGFKVSFLVTGMHMLDRYGLTKIEVHRVQGATVHEFLNQ  
REGDPQDITLAKSIIGFSDIFAELRPDLVVFHGDRIEALACALVCATNYIRSAHIEGGEVSGTIDEVFRH  
CNTKLAACHFVSSEAAAKRVMTLGEPADRIHVIGSPELDFHARPSGVTLPVLSRYDIPFDDYGVTLF  
HPVTSEAATMGRQAADLFGALEASGRNFVVIAPNNDPGSREIFAVLEQLPRERFRLIPSMRFAHFSEL  
MKHAACLVGNSSAGVREAPFLGIPSLDIGTRQTNRAEAPSLFSADAAEREKIAAFLATEWGTKRYPPH  
TAFGEGRAAERFLEVLADEGFWQGGGLQKTFADHG

>B\_ALPHA\_4 gi|83309178|ref|YP\_419442.1| UDP-N-acetylglucosamine 2-epimerase [Magnetospirillum magneticum AMB-1]

MKRICVVTGTRAEYGPLFWVLKEIDAHADLELQLVVTGMHLSPEYGSTWKTIEADGFAIAAKVEML  
LSGDTGVAIAKSMGLGTIGFADAFERLKPDI VVVWGDRFELMAAVQA AVVARIPIAHIGGGDVTEGA  
FDDAIRHAISKMAHLHFPIIADSARRLRQLGEDPERIHLTGNASLDHLRRTIFLERA EVETRLNFSLRP  
RNVLVTYHPVTLDP EEGRRGWAEMLA ALES LGDEVGIVMTAPNADNDSRELMVALEAFVGAHPNA  
ILRTSLGSQLYMSTARLCD AVVGNSSSGLLEIPSLGVATVNIGTRQKGRPRADSVIDCPPERA AIRAAM  
DRAMAMDCSAVVNPYGDGQSARRIVQVL AGIEDFPALLHKSFVDLAGPGEAGEE

>B\_FIRMICUTES gi|302871579|ref|YP\_003840215.1| UDP-N-acetyl-D-glucosamine 2-epimerase, UDP-  
hydrolysing [Caldicellulosiruptor obsidiansis OB47]

MRKILFITGTRADY G K I K P L M R K V E E S K E F E L H I F V T G M H M L S K Y G S T W K E I E K D G F K N I Y K F I N Q Q  
Y N F H M D I A L S N T I I G L S N F V N E L R P D M I V V H G D R L E A L A G A I V G A F N N I R V A H I E G G E V S G T I D E S I R H  
A I T K F S H I H F V C N E E A K K R V I Q L G E K P E S V Y V I G S P D I D V M L S D T L P S L R E V K E H Y E I E F E N Y A I F I Y H P  
V T T Q I D I L H R N I K E V I D A L I E S G K N Y V V I Y P N N D E G S N I L K E Y E R F K M N K R F K I F P S L R F E Y F L T L L K H  
A D F M I G N S S A G I R E A G I Y G V R V I D I G I R Q K G R Y D I S K F K N I I H V N E N K E E I L K A I Q K V Q L V D K F Y I S A F G  
D G K S A E R F I N I L K S E D V W N I E I Q K N F V D I E F

>B\_FIRMICUTES\_2 gi|253681586|ref|ZP\_04862383.1| UDP-N-acetyl-D-glucosamine 2-epimerase, UDP-  
hydrolysing [Clostridium botulinum D str. 1873]

MNRKIAVITGTRADYGIYYSVLKAIENHKDLELHLIVCGMHLSPEFGMTINEIEKDGFKIDDKIDTILS  
SDSGEAMAKSIGITLMGLTQSLDRIPDVL LILGDRGEMMAGALAAIHMNIPVAHIHGGEVTGTVDE  
SIRHSITKLSHIHF PANEDSRERIIKMGE EKKNVYVVGAPGIDYIKNTEYLSREEVLRFRNLKDDKIFIL  
TQHPVTTEKDMVVYQIETLSAIAELGVQTIISYPNSDNGGREIIVIEKYREKYDFLKVFKNLSQVE  
YLSLLNTADIMIGNSSSGIIEAPSFKLPVINIGTRQQGRLRACNIIDVSYNRKEILSAIDK VLYNEEFKKE  
LKKCENPYGDGHSGERIADILSKVDINHQLIQKRITY

>B\_FIRMICUTES\_3 gi|118444030|ref|YP\_877858.1| UDP-N-acetylglucosamine 2-epimerase [Clostridium  
novyi NT]

MKRKIAVITGTRADYGIYYSVLKAIENHKDLELSLIVCGMHLSPEFGMTIEEIQKDGFKIDDKIDTILS  
SDSGSAMAKSIGITLMGLTQSLERINPDILLILGDRGEMIAGALAAVHMNIPVAHIHGGEVTGTVDESI  
RHSITKLSHIHF PANEDSKRRIIKMGE E E K N V Y V V G A P G I D Y I K N T K Y L S R E E V L K R F N L K D D K I F I M T  
QHPVTTEKHMVSNQIETLSAIAKLG VQTIISYPNSDNGGREIIVIEKYREKYDFLKVFKNLSQVEY  
LSLLNTADV MIGNSSSGIIEAPSFKLPV V N I G T R Q Q G R L R A C N I V D I S Y S K K E I L D A I D K V L Y D E E F R K  
N L E N C E N P Y G D G K A G E R I A D I L S K I Q I N S D L I Q K R I T Y

>A\_EURY gi|91773549|ref|YP\_566241.1| UDP-N-acetylglucosamine 2-epimerase [Methanococcoides  
burtonii DSM 6242]

MKRKIAVVTGTRADYGIYLPVLKAIQRSSKLDLSLIVTGMHLSETFGHTVDEIEKDGFSIDAKIPLGLL  
EDSGASMALDVGICILGLTDALKKIKPDILLVLGDRGEMLATTIAGIYMNIPVAHLHGGEVSGTVDES  
IRHAITKLSHIHF PATEESAERIRNLGEDEFRIYVVGAPALDTILSETFVPKEEMGHFFDIDINKPIILVVQ  
HPVTTEVG AVERHIRETMDAVVELGEQTVVIYPNADAGGRKIITIEQYRN YAFIKIFKNIRHVDYLSL  
MRTTNVMVGNSSSGIIEAPSFGLPVV N I G T R Q T G R Q R G Q N T I D V D Y D K D E I I K A I K V G L Y D K D F K R K  
A S K C I S P Y G N G H A G T A I A E I L E S I

>A\_EURY\_2 gi|289579837|ref|YP\_003478303.1| UDP-N-acetyl-D-glucosamine 2-epimerase, UDP-  
hydrolysing [Natrialba magadii ATCC 43099]

MSSTRKILVLTGTRAEYGLLRSSMEAIQNHDDLTL SIVATGMHLSPQHGMTVEKIREDFGFSIDREVL  
MQLSGDSETAMAKSLGIGTASLADAFESLDPDV LLLGDRDEALAGALAAASHMNIPVAHVHGGDS  
AHGAMIDESIRHAITKFSHIHF PASERSAERIKKLGEESWRIT IAGAPGLDDILAGEYEDPESVLQKYD  
LDPDRLLMVLQHPVTTQPDAAAGEQMAATLDAVE STEAQAVI IYPNSDAGSNQMIDEIESRSFGADV  
RFRNMPRKEYLGLMAATDVMVGNSSSGIIEAPSF DLPVVDIGPRQRGRERTQNTFSAEHESEQIREK  
IYQCLNEGVL DENQDNPYDYGGAGSRICERIRTINIDENILRKKLTFGRWF

>A\_EURY\_3 gi|150400855|ref|YP\_001324621.1| UDP-N-acetylglucosamine 2-epimerase [Methanococcus  
aeolicus Nankai-3]

MKNRRIKVVAVVTGTRAEY G I L K P L I E K I N D D N D L E L Q L M V T G M H L L K K F G Y S I K E I E N D G F P I A S K I  
R M Y D E D S L G E L S Y H G V S L G R A V S E F T R E F V Y L N P D I V L V I G D R L E A L A P V L S A S T L N I P I G H I H A G D S T  
D S G H I D E Q I R F A I S R F S H L L F A P T E K C V E R L T K M G E E P W R A Y N V G A L G L D S I L S Y K P L T K E E L F K K L N L  
N G D N P V A I I I F H P V I H E Y S T I D H Q I E S I M K A V I E T K I N T V V I Y P N N D L G S K K I I E I I K K Y S N F E N I K L F E N L E  
H N I Y I S L M Y H A N L M I G N S S S G I I E A P S L G L P V I N V G S R N T G R E H G D N V L F V K P V S K E I V E A I N K A L Y D I  
D F I E K V K K K N N P W G D G K T S E R L V N I L K N T E I N E H F M R K R I L Y

>B\_BACTERIODETES tr|Q9RGJ0|Q9RGJ0\_BACFR UDP-N-acetylglucosamine 2-epimerase  
OS=Bacteroides fragilis GN=wcgL PE=3 SV=1  
MEIKLDYSDIKFRYDGLRLLIIVGTRPEIIRLA AVINKCRRYFDCILAHTGQNYDYNLNGVFFHDLGL  
QAPDVYMDAVGDDLSTMGNILNASYKLMShLRPDAVLVLGDTNSCLSVISAKRLHIPIFHMEAGN  
RCFDECLPEETNRRIVDIISDMNLCYSEHARRYLNASGVAKERTYVTGSPMAEVLSENLSAIESSDIH  
ARLGLRKGQYILLSAHREENIDTDKNFASLFEGINAMAKEYDMPVLYSCHPRSRNRLESSGFKLDSR  
VIRHAPLGFHDYNCLQMHAYAVVSDSGTLPEESSFFTSVGHSPAVCIRTSTERPEALDKGCFILAGID  
KASLLQAVDTAVEMNRNGDNGVPPDYMDRNVSTKVVKLIQSYTGIVNIVWRKS

>B\_BACTERIODETES\_2 tr|Q9F752|Q9F752\_BACFR UDP-N-acetylglucosamine 2-epimerase  
OS=Bacteroides fragilis GN=wegT PE=3 SV=1  
MLKVM TIVGTRPEIIKLSRVMAELDKYTEHIMVHTGQNFYELNEIFFQELRIRKPDYFLDAAGKNA  
AETIANVIRKSDELMDQVKPDALLYGDTNSCISVISAKRRKIPIFHMEAGNRCFDQRPVEINR KIVD  
HLS DINMPLSEHARKYLLAEGLRPETVIKIGSPMTEVLIYHKA EIEENDVLEKEGLKKG DYFIVSTHR  
EENV DSEKNFSDLLSSLNAIVDKYHKKVIVSTHPRTRKKLESIGFINSNPMIEFMKPF GFMEYIKLQQ  
NAFCVISDSGTITEESSILHFPAITIRQAHERPEGMDEGTLIMTGLNSDRILESIEIVTSQYAEGADVIHSI  
PDYASDNVSKKVVRIILSYTDYINRTVWHKEI

>B\_BACTERIODETES\_3 tr|Q9RGJ8|Q9RGJ8\_BACFR UDP-N-acetylglucosamine 2-epimerase  
OS=Bacteroides fragilis GN=mnaA PE=3 SV=1  
MKKIMLVFGTRPEAIKMAPLVKEFQKYPKEFQ TIVCVTGQHREMLDQVLHLFHIRPNYDLNIMKQG  
QDLYDVTARVLIGMRDVLAEVRPDLVVHGD TTTSTA AALSAFYQQIPVGHIEAGLRTHNVYSPWPE  
EMNRQVTGRIATYHFSPTLLSRQNLLENGVKGDFIIVTGN TVIDSIYMVVDRIRHDKLLEVQLRNVLS  
TSGYDVKRLSNDKKLVLITGHRRENF GDGFISMCAIKALSEKYPNVDFVYPMHLNPNVRKPIHEVF  
GDELS DLNLFIEPLEYLSFVYLM EKSIIVLTDSGGIQEEAPGLGKPVLMRDTTERPEALEAGTVK  
LVGTNYDKIVNEVSALLDDSDYNTMSKAVNPYGDGKACSKIVNFLLA

>B\_BACTERIODETES\_4 tr|Q64V44|Q64V44\_BACFR UDP-N-acetylglucosamine 2-epimerase  
OS=Bacteroides fragilis GN=BF1886 PE=3 SV=1  
MCAKKQIIPQESVNLFL ENCKNTKMKITIVAGARPNFMKIAPITRAIDA AKAQGKRISYRLVYTGVEN  
DNSLDASLFADLHMKAPDAYLGVNGN NPTELTAGIMIAFERELTENP THVVLVVDDL TATMSCAIVA  
KKQNIKVAHLVAGTRSFDM SMPKEINRMITDGLSDYLFTAGMVANRN LNQTGTENETVYYVGNILI  
DTIRYNRNRLIKPVWFSVLGLKEHE YILLTLNRHVLLNNKENLQELMETLLKKANGMPIVAPLHTYV  
RDAIKALGITAPNLHIMPTQS YLSFGYLMNQAKAIVTDSGNVAEEATFLGIPCITLNTFAEHPETWRTG  
TNELVGEDPAALGACMDKLMNGEWKQGTLP ERWDGRTAERIVQILLGE

>B\_BACTERIODETES\_5 tr|Q64MP1|Q64MP1\_BACFR UDP-N-acetylglucosamine 2-epimerase  
OS=Bacteroides fragilis GN=BF4509 PE=3 SV=1  
MKKILLVFGTRPEAIKMAPLVKALQRDTEHFETKVCVTAQHRQMLDQVLEVF DIIPDYDLNIMAPN  
QDLYDITTKVLLGLRDVLKDFCPDTVLVHGDTTTSMAASLAAFYRQVAVGHVEAGLR TYDMLSPW  
PEEMNRQVTDRICTY YFAPTGKSKQNLLENIDAKKIFVTGN TVIDALLMAVDIISKKPGI KEKLHQE  
LRDKGYEVGQREYILVTGHRRENF GEGFLHICKAIRELAALHPEMDIVYPVHLNPNVQKPVYELLSG  
VDNVYLISPLDYLPFIYAMQHSTLLLTDSGGVQEEAPSLGKPVLMRNTTERPEAVEAGTVKLVGTD  
AEAIVSNVTELLRNKELYRRMSETHNPYGDGHACERILSALTR

>B\_BACTERIODETES\_6 tr|A6GZ45|A6GZ45\_FLAPJ UDP-N-acetylglucosamine 2-epimerase  
OS=Flavobacterium psychrophilum (strain JIP02/86 / ATCC 49511) GN=fnlC PE=3 SV=1  
MKKLVMTVVGTRPEIIRLSRVL MALDESEAIEHIVHTGQNYDYELNQIFFEDLGLRKP DYFLEAA  
GKTATETVGNILIKIDPLLEQLQPD AFLVLGDTNSCLCAIPAKKRQIPIFHMEAGNRCFDQRPVEETNR  
KIVDHTSDVNLTYS DIAREYLLREGLPADRIIKTGSPMFEVLHHYLPQIKKSDVLSRLNLEEGKYFVV  
SSHREENINSEKNFKGLIESLN LIAEKYNYPIIVSTHPRTRNMIDKMKVQVRPEVQFLKPLGFHDYNA  
LQMRSYAVLSDSGTISEESSTLNFRALNIRDAHERPEAMEEASVMMVGLSPERIMQGLVQLQSQEIGE  
KRNFRSVADYSMPNVSQKMVRIILSYTDYINRVVWVSKK

>B\_BACTERIODETES\_7 tr|Q64XB8|Q64XB8\_BACFR UDP-N-acetylglucosamine 2-epimerase  
OS=Bacteroides fragilis GN=BF1108 PE=3 SV=1

MEIKLDYSDIKFRYDGLRLLIIVGTRPEIIRLA AVINKCRRYFDCILAHTGQNYDYNLNGVFFHDLGL  
QAPDVYMDAVGDDLSTMGNILNASYKLMShLRPDAVLVLGDTNSCLSVISAKRLHIPIFHMEAGN  
RCFDECLPEETNRRIVDIISDMNLCYSEHARRYLNASGVAKERTYVTGSPMAEVLSENLSAIESSDIH  
ARLGLRKGQYILLSAHREENIDTDKNFASLFEGINAMAKEYDMPVLYSCHPRSRNRLESSGFKLDSR  
VIRHAPLGFHDYNCLQMHAYAVVSDSGTLPEESSFFTSVGHSPAVCIRTSTERPEALDKGCFILAGID  
KVSLQAVDTAVEMNRNGDNGVVPDYMDRNVSTKVVKLIQSYTGIVNKIVWRKS

>B\_BACTERIODETES\_8 tr|Q64Q32|Q64Q32\_BACFR UDP-N-acetylglucosamine 2-epimerase  
OS=Bacteroides fragilis GN=BF3656 PE=3 SV=1

MKKKILLTFGTRPEAIKMAPLVKELQEKKDCFEILVCVTGQHREMLDQVLHIFDISPDYDLNIMRQG  
QDLYDITSRVLLGMRTILIEKPDIVLVHGD TTTSTATALAAFYQQIPVGHIEAGLRTHDIYSPWPEEM  
NRQITARIATYHFAPTILSKQNLINEGVKEDFIFVTGNTVIDALYVWVNKIKTNEGLSKAIKDALKSSG  
YNIDNRGTEKKIVLITGHRRENFEGEFIHMCHAIKTLAEKYPDVDFIYPMHLNPNVRKPINDFVGEQ  
KFINIFFIEPLEYLSFVYLMDKSFLVLTDSGGIQEEAPGLGKPVLMRDTTERPEALEAGTVKLVGTD  
YYKIVKEVSKLLESKTYYESMSKAVNPYGDGCACSRIVTLLQEV

>B\_DICTYOGLOMALES tr|B5YCQ1|B5YCQ1\_DICT6 UDP-N-acetylglucosamine 2-epimerase  
OS=Dictyoglomus thermophilum (strain ATCC 35947 / DSM 3960 / H-6-12) GN=DICTH\_0427 PE=3  
SV=1

MKVVSIVGAR PQFIKLAPFSAELRKNGIKEVILHTGQHYDENMSEFFKELEIPEPDYNLIGSGSHG  
EQTGRMLIGIEEVLVKEKPDVVIVYGDTNSTLAGALASAKIHIPLAHVEAGLR SFNKKMPEEINRIVA  
DHLSDILFCPTETA VENLKRREGIEKGVYLVGDV MFDALMHFSKLAKEKSKILEKLSLNP KDYYLITV  
HRAENTDNPERLKNIFSAISELDKEVIFPIHPRTKNRLKELGLEGYLRGRVRIIDPVG YLDMIELEKNA  
LAILTDSGGVQKEAFWLRVPCITLREETEWVETLKYGWNILVGSNKERILEAIKNIKNGKEISFENDY  
ASPKMREVLIKELERRREDDR

>B\_BACTERIODETES\_9 tr|A6GZ15|A6GZ15\_FLAPJ UDP-N-acetylglucosamine 2-epimerase  
OS=Flavobacterium psychrophilum (strain JIP02/86 / ATCC 49511) GN=neuC PE=4 SV=1

MNKKILFLTGTADFGKIKSLIQILEAHPNFEPYIFVTGMHLQEEYGYTFLEVQR CGFRNIHTFQNHT  
HETTMDLTLAKTITGLSAYVKDCQPDMIVIHGDRVEALAGAIVGLN NILVSHIEGGEVSGTIDELIRH  
ATSKMSHIHFVSNDQAKKRL LQMGE LHE SIFIIGSPDV DIMFSKSLPDLQTAKKYYEITFNDYAVVMF  
HPVTTEAKYIAQYANDFVHVLLADTHNYVVVFPNNDLGSHAI IQAYEKLKNNKRFRVFP SLRFEYFL  
TLLKNAQFIIGNSSAGIREAPYYGLPIINIGTRQQNRAAHTHIINVDY NKLHIQEALSSIDSHKVQPSKN  
DFGQGNSAKLFLASLEKNDIWQINYQKQFNDI

>B\_DICTYOGLOMALES\_2 tr|YF19|B5YF19\_DICT6 UDP-N-acetylglucosamine 2-epimerase  
OS=Dictyoglomus thermophilum (strain ATCC 35947 / DSM 3960 / H-6-12) GN=DICTH\_1307 PE=3  
SV=1

MKKKISLVFGTRPEAIKMAPVAKIIESEFFDLQIILTAQHRELLDQVIEIFGLKSDYDLNIMQEKQTLT  
HITVKVLQGLDIIWQKDPDMVVLVHGD TTTTFAASLAAFYK KLPIGHVEAGLR TYNKYQPYPEEMN  
RHLTGVLADLHFAPTQRAKDNLINERVPKENIFITGNTVIDALLFVHRNMNQLKPQDLVKNLPEK FIL  
VTAHRENWGEPLKNIVLALDEILKEFEDFYV VFPVHPNPLVREQVY SVLKD NKRAILIPPVDYVTM  
VYLLDKCYLVLTDSGGLQEEAPSLGKPV LVLREVTERPEAVEAGTVKIVGTSKESIVREVRRLILNKE  
EYVKMSKAINPYGDGKASERIRDILLYYFGFIDTPPSEFNP

>B\_CYANOBACTERIA tr|Q05U86|Q05U86\_9SYNE Putative UDP-N-acetylglucosamine-2-epimerase  
OS=Synechococcus sp. RS9916 GN=RS9916\_38627 PE=4 SV=1

MALIMRKICVVTGTRADYGLLRWVIDGISKSSMLQLQIVATGMHLSHEFG LTFKEIENDGYNIDLKV  
EMLLSSDSSVGITKSIGLGIIFADAFKELNPDIVLLLGD RFEIFAAATAALISKIPVAHCHGGETTEGAF  
DESIRHSITKMSHLHFVAAREYQERVLQLGEDPEN VHLVGG LGIDNIKKLSLLDKSSLESELEFKFQD  
TNYLVTFHPVTLDTYSGTEQITELLRALS NLVNTGIIFTMPNSDTGSRPLMNLINNFCS DHEYASSYTS  
LGQIKYLSTLKYVDAVIGNSSSGLLEAPT FKTATINIGDRQKGR LMASVINCDPNCISIQNAINHLNS  
HAFKQSLNTTVNPNNGSGGSADKIIKVLESYKYPTKLQKKFHSYP

>B\_CYANOBACTERIA\_2 tr|Q05WR5|Q05WR5\_9SYNE UDP-N-acetylglucosamine 2-epimerase  
OS=Synechococcus sp. RS9916 GN=RS9916\_33397 PE=3 SV=1

MVVLLKPMAGKPRVTIVLGTREAIKLPVQIEFQACQLETRVVLTGQHREMTQVMDLFLSKAD  
QDLNLMAPRQTLTHVTCAALQGLRDFQAYPPSLVVLVQGDTTTTAFAAALAAFYEQIPVGHVEAGLR  
TDNILDPFPEEANRRLISQVAQLHFAPTQOSESNLLASSVVGKVMVTGNTVIDALLRMAERAPQLDD  
VAIDWSRQRVILATVHRRENWGERLQISAEGLQVLNDHPDTALLPLHRNPTVREPLQALLGNHP  
RVVLTEPLDYDRLVAAMKGTLLLTDSGGLQEEAPALGKPVVLRRTTERPEAVEAGTARLVGTDAG  
TIAEEAHRLSDPQAYDAMARAVNPFQGDGQASARILEAARALLEV

>B\_CYANOBACTERIA\_3 tr|A0YRX0|A0YRX0\_LYNXP UDP-N-acetylglucosamine 2-epimerase  
OS=Lyngbya sp. (strain PCC 8106) GN=L8106\_19768 PE=3 SV=1

MINSRIRVAVVLGTRPEAIKLPVQQLQLSSDFETHVILTGQHREMTQVMDLFLSKAD  
RSQTLTDITWRSLQGLEGLFQQLRPDIIVQGDTTTTAFAAALAAFYQKIPVGHVEAGLR  
TNDLLNPYP  
EEANRRLISQLTQFHFAPTTQAVDNLRNSGVLGEVHHTGNTVIDALLSVVKCQPELKVAEGSWSQYR  
LILATVHRRENWGIPLTQIAESFLKILDDFPDTALLPLHRNPTVREPLQKILGNHPRIFLTPDYAEL  
VAAIDRCYFVLTDSGGLQEEAPSLGKPVVLRKTTERPEAITAGTAKLVGTETAIVEAATELLNNINT  
YQKMATAINPFQGDGHAAEYIVQIIRSHFEGKDRS

>B\_CYANOBACTERIA\_4 tr|A2C1S1|A2C1S1\_PROM1 UDP-N-acetylglucosamine 2-epimerase  
OS=Prochlorococcus marinus (strain NATL1A) GN=NATL1\_08731 PE=4 SV=1

MDKKVLLFVTGTRADFGKMEPLAREAFNNGFKVIFVVTGMHMMREYGLTKEEVHKNKDIQIFEF  
S  
NQKYGDKLDTILSNTVIRGFSNYVKEINPDIVIIHGDRIEAIAACSLVCSTNNIISAHIEGGEVSGTIDEV  
F  
RHCNTKLCTFHLVSSNEAKRVRQMGEPKNIIVIGSPELDIHRKSGVDLLQVKERYKIDFKEYGIC  
IFHPVTTEENQIKIQAENLFKLSISNRNFVILPNNDPGSIYICNEIDKLNSNFRIPSMRFNYFSELMK  
NSSLIIGNSSLGVREAPFLGIMSINIGTRQNKRALTQSIYNCSGQSIPEIVDAIGKFWNKTTSHKGF  
S  
GNSRKKFLKFINSDKIWNQSTQKSFEEL

>B\_CYANOBACTERIA\_5 tr|A2C1Q6|A2C1Q6\_PROM1 UDP-N-acetylglucosamine 2-epimerase  
OS=Prochlorococcus marinus (strain NATL1A) GN=wecB PE=3 SV=1

MKRISVIIGTRPEAIKFGPLILAFKTKIDLRISTGQHYELVDQVNEFKIVPNKNLKIMVPGQSLTKI  
TNEVLIGLKEDFNEYPPDLVLVQGDTTSAFSAALAAFYEKIPIGHIEAGLRNTQIMLPYEEANRRIISQ  
IASIHFAPTKIAFENLKKESVLGEVYLTGNTVVDLSLLFISEKAQIPKIKNVDFIKQKIILATVHRRENW  
G  
ANLKQIAKGLKILDEHLDYILILPMHPNKSLEPLEEILGVHERAILTESLSYNSLVGTLKHTKLLLT  
DSGGLQEEAPTFGVPVLRDSTERPEAIKAGTAKIVGSNPNKIFKEANNLLTNQKEYQKMSKAINPF  
GDGKASERIVKYCIEFLERNKK

>B\_THERMOTOGAE tr|A5IJG4|A5IJG4\_THEP1 UDP-N-acetylglucosamine 2-epimerase OS=Thermotoga  
petrophila (strain RKU-1 / ATCC BAA-488 / DSM 13995) GN=Tpet\_0308 PE=3 SV=1

MRVLSLVGARPQIIKEAMLHREFKEKGIIEILVHSGQHYDYNMSDVFFEVLEIRQPHYNLNVGSGTH  
GEMTGKIMIEFEKVLLREKPDVLVYGDNTTLGALVAAKLPKIPVAHVEAGLRQHPKDMPEEINRI  
VTDRVSQILFCPSLAVENLRKEGITEGVYFTCDVMYDLFLKMKPLFRYDLFRTLGLKENGIVCTIH  
RDFNTDVPERLREILEQLRRLSKRYEVVFPVHPRTAKRIRREFGLAELLNEILVIEPADYLNMMGLIEKS  
RFVITDSGGLQKEAYWCGKRAIVMPDTGWRELVEAGWNVLSEPEITEKSEYIDNHVSLPENVYG  
EGNASEKLAEVILQL

>B\_THERMOTOGAE\_2 tr|A5IJF6|A5IJF6\_THEP1 UDP-N-acetylglucosamine 2-epimerase  
OS=Thermotoga petrophila (strain RKU-1 / ATCC BAA-488 / DSM 13995) GN=Tpet\_0300 PE=3 SV=1

MKVLVSLV GARPQIIKEAVLHRRFKEKGIKEVLVHSGQHYDYNMSDVFFEILQIRKPDYNLN  
VGS  
GTH  
GEMTGKIMIEFEKVLLKEKPDVLVYGDNTTLGALVAAKLPKIPVAHVEAGLRQHPKDMPEEINRI  
VTDRVSQILFCPSKLA VKNLEREGITEGVYFVGDVMYDLFLKMEDRFRYDVFEKLGKENE  
FILVTL  
HRDFNVDDPVKLRKILEQLKRISREKVVFPPIHPRTKNRVKEFGLENLLEGMVVIDPVDYLNLMGLV  
KRCWKVVTDSGGLQKEAYFAGKRAIVMPDTGWRELVEAGWNLKLA SEENLFDVTMEEDCSEYPSG  
LYGDGNAAGKIVEVIEEWFRSLRGIH

>B\_THERMOTOGAE\_3 tr|A5INE8|A5INE8\_THEP1 UDP-N-acetylglucosamine 2-epimerase  
OS=Thermotoga petrophila (strain RKU-1 / ATCC BAA-488 / DSM 13995) GN=Tpet\_1716 PE=3 SV=1

MIRVLSVFGTRPEAIKMAPLVKKLEEEERNVESLVCVTAQHRQMLDQVLEVF  
DIK  
PDFDLNIMKERQ  
SLADITVNALSGLYDLIEELKPDIVLVQGDTTTTFAGALAAFYHRIPVGHVEAGLR  
TNDRYSPFPEEIN  
RRLTGVLSTLHFAPTKRNRENLLRENVMGKIYVTGNTVIDALRYTVKESHVFNENPVL  
RNMDFSDGR  
YILLTSHRRENIGKPLENICKAVRRIVEEFEDVRVIYPVHMNPAVREIVFPMLN  
MERVFLIDPVNVID  
MHNLMARSYLIMTDSGGIQEEAPALGRPVVLRRETERPEAIEAGVAVLGGVEEERIFELAKKLL  
LDR  
EYEKMAKAVNPFQGDGRASERIVKAILHEFGLSDPPEEFG

>B\_ACIDOBACTERIA tr|Q1IILE3|Q1IILE3\_ACIBL UDP-N-acetylglucosamine 2-epimerase  
OS=Acidobacteria bacterium (strain Ellin345) GN=Acid345\_3306 PE=3 SV=1  
MKLVTVVGARPOFIKSGPVSLAIEKHNRENGVTIEEILVHTGQHYDSEMSQVFFFEEMNLRTPKYNLE  
VGSGNHGEQTAQILARCEKVLMDKATALMVYGDTNSTLAAALAAVKLHIPVFHVEAGLRSFVRE  
MPEEVNRVLTDHISDLLFAPTDTAVENLKAEGITKGVELLGDVMDAIQQHLQTAKMSSSILNTLALT  
PGGYALMTMHRASNTDDPALLGQILSAISEIAKNIRVWPVHPRARKRMEDFGIHAEGITLISPASYL  
DMMMLVSNASLVLTDSGGLQKEACWMRVPCVTLRDETEWVETVASGWNTLAGADRQILMAAR  
KALTSKPSETPGAQHAGASERIAASIRDYMTKRG

>B\_ACIDOBACTERIA\_2 tr|Q1ISX2|Q1ISX2\_ACIBL UDP-N-acetylglucosamine 2-epimerase  
OS=Acidobacteria bacterium (strain Ellin345) GN=Acid345\_1025 PE=3 SV=1  
MHFLHVVGARPNFMKAAPLIRALEQRGSRQTLVHSGQHYDRNMSTVFFDQLGIRKPDVNLQVSGS  
SHAQQTAAIMSRVPEVLLNQRPDVIVYGDINSTVAVALVCAKLGKLIHVEAGLRSFDRSMPEEINR  
LVTDQLADVLFPTSLDGDENLHREGIPDNKVHVFVGNIMIDTLVRLPLAELRFADLAAKFNLIKFGV  
TLHRPSNVDDISHLAPLLFALDRIAEDPLLPVHPRTLQHMQEFSINLHHLQILEPLPYIDFLSLQORA  
ALVITDSGGIQEETTYLGIPCLTVRENTERPVTVTGLTNLLVGSDFHRMESEARKVIAGNKKCGSIPPL  
WDGHTSDRIASILINCGSFPDPNDVKNSHSLLVDASVSA

>B\_ACTINOBACTERIA tr|A7VMX0|A7VMX0\_STRKA UDP-N-acetylglucosamine 2-epimerase  
OS=Streptomyces kasugaensis GN=kasQ PE=3 SV=1  
MALRVGIVYGTRPEAIKLAPLVLALDADPGFEPVIITGQHRDMLDEINELFGLRPRHNLDIMRPGQR  
LSAMASRIVGELGDPLLDELVDVAVVQGDSTAFAAAYAAACERIPVAHLEAGLRTGDRFEPFPEEIN  
RRLITQLADLHFAPTADAAGNLLAEGVRSDDVYVTGNTVIDAMHLVLDLDRPGDSANRELD AFTEGRQ  
TVLLTMHRRESWGIPMGRVAAAVAELCRSRPTLRFVIPLHPNPEVRRVFRSHLSSLSQVLLCEPLRYSE  
FIRLMHRAVLVLTDSGGVQEEAPT LGKPVVLRDRTERPEGIAAGCARLVGTD PALIVKEVGRLLDDP  
EAYEAMRRPGIFCYGEGDAAARCLEALRERWPSSPDASAE LRTYR

>B\_ACTINOBACTERIA\_2 tr|Q3V7C2|Q3V7C2\_STRKA UDP-N-acetylglucosamine 2-epimerase  
OS=Streptomyces kasugaensis GN=kasQ PE=3 SV=1  
MALRVGIVYGTRPEAIKLAPLVLALDADPGFEPVIITGQHRDMLDEINELFGLRPRHNLDIMRPGQR  
LSAMASRIVGELGDPLLDELVDVAVVQGDSTAFAAAYAAACERIPVAHLEAGLRTGDRFEPFPEEIN  
RRLITQLADLHFAPTADAAGNLLAEGVRSDDVYVTGNTVIDAMHLVLDLDRPGDSANRELD AFTEGRQ  
TVLLTMHRRESWGIPMGRVAAAVAELCRSRPTLRFVIPLHPNPEVRRVFRSHLSSLTQVLLCEPLRYSE  
FIRLMHRAVLVLTDSGGVQEEAPT LGKPVVLRDRTERPEGIARAAPGWAPTRHSSSKRSADCSTT  
PRRTRRCGVRASSATARGTPRHGAWRHCASAGCLPPTRRPDSGRTGDRGRPGPAPAGRCRTDRHRP  
GCRGTPGGR

>B\_ACTINOBACTERIA\_3 tr|A8L039|A8L039\_FRASN UDP-N-acetylglucosamine 2-epimerase  
OS=Frankia sp. (strain EAN1pec) GN=Franean1\_2163 PE=3 SV=1  
MPDQGGPLAAGLHAVVIAGARPNFIKVKPVLDALAADGARSSVHTGQHYDEAMSDVFFADLGLR  
QPDYHLEAGSGSHAVQTAAVMTAFEP LLARLAPDVVVVVDVNSTLACALVAAKANVPVAHVEAG  
LRSGDRTPPEEINRIVTDRVSDLLFAPSPEGVVHLLSEGARPESVHLAGNVMVD TLLACRERARSRP  
VLADLGLTPGEYGLVTLHRPSNVDDPAVLDGLLTALGEIARRCPLVFPVHPRTASRLAGRLPDGVRAL  
GPAGYLDCVALQMGARLVLTDSGGVQEESTVLGVPCLTLRESTERPITVTEGTRNVVGCSPAAIMAG  
AFEVLD RPPPPRC PDLWDGHAGRRISAVLGR TLERRARRGGGSRPRGRAEAVPDPLLPTSPAD RGA

>B\_ACTINOBACTERIA\_4 tr|A3PW76|A3PW76\_MYCSJ UDP-N-acetylglucosamine 2-epimerase  
OS=Mycobacterium sp. (strain JLS) GN=Mjls\_1351 PE=3 SV=1  
MGGVTEVHLVAGTRPEAIKLAPLVPALRAQGMTPV FVASGQHPTMVHQALDAFGLEPDVTL SIDRG  
SGSQAELMAALTMKLEKHWQQRTPAAVVVQGD TTTVLAAMVAFWAKLPIAHLEAGLRSHDLAA  
PFPEEGNRKLVGQISRLHLAPTARARANLEREGT PAADIVVTGNTVIDAVLGIAARGGPVTDSRVA AF  
VERARAGASRLVLVTAHRRESWGEPLDRVLNAVALLLEKYS DVEVVLPAHPNPAVAEQVRAVLGAH  
PRVLVTEPLAYPVLV GALAAS TLVLSDSGGIQEEAP SFGVPVIVLREVTERMEAVDAGCAILVGTDRD  
AVLGNACRLDDPDERTAMVSKGNPFGDGRAAERSAAAIAWMLGR TDGRPAEFRF

>B\_ACTINOBACTERIA\_5 tr|A8L0M7|A8L0M7\_FRASN UDP-N-acetylglucosamine 2-epimerase  
OS=Frankia sp. (strain EAN1pec) GN=Franean1\_5202 PE=3 SV=1

MGVSHRIPAARPRPQTGHTATSPNTTGLDDGGAGGQTPVPGQGARGQSIPGQGAGGPGVPGQGAGGP  
GVGAQGVGGQNVGGQGAEEQNVADQGAAGESTAGWGPAERGGMTAMTGTAGTTARTGPSVPTAP  
STPIAPTGPTVPTVPPNRRLPPDRQGAAGRMTMPDRVPRTEIMGVPAVPVPRGRPGAHRARVMILVG  
TRPEIVKLSRIIAALERAVDVCLVHSGQHYDYELNQVFFDELGIRKPDHFLDAVGASAAETIGRVIARS  
DAVFVDESPDALLLYGDTNTTLAVIAARRRHIPVFHLEAGNRCFDDRVPEEINRRLVDHLSINLPLTE  
HARRHLLAEGLPAQRIFVTGSPMKEVLDHYAPLVDASPVLTNLGVTAGHFLVVSAREENVDAPPELL  
IGLLETNLALAARYRVPIIVSTHPRTDRDLDALEASGRAPATDGLVRFRCRPFQFADYIALQRAAQCVIS  
DSGSLTEEASLLGFPVAVMIREAHERPEGVDHGVAVSCLRPDRVLAADVLDVDAQAQGDRAPIVDPY  
DVDDVSRVVRVSHIDYVRRVWFVFERPPVGTSEPTPGGTSLTLP

>B\_ACTINOBACTERIA\_6 tr|A8LFA2|A8LFA2\_FRASN UDP-N-acetylglucosamine 2-epimerase  
OS=Frankia sp. (strain EAN1pec) GN=Franean1\_0381 PE=3 SV=1

MTDSSDGRTVLLVYGTRPEAIKMAPVVHELGRTPGLRPVAVTQHRSMQDQVNDLFGIVPDYDLG  
ILRDRQSLAGVTTRSLGGLESVMAEVRPDVVVVQGDTTTAFTGALAAFYQGLPVVHMEAGLRTED  
PASPFEEINRRLTSQLADLHLAPTSPARANLLAEGIRPESVLVTGNTVIDALLHVTAAPPPDRLLAE  
VRQRSGDGRRQVLLVTAHRRESWGEPLARVGAALARLAEQRPELLIVLPVHRNPVVRETVPVVEG  
FPNILVADPVDYAAFAHLMKAATVVLTDSSGGIQEEAPSLGKPVLRDNTERPEGVQAGTACLVGTE  
PNRIVAADVRLDDPVAYAAMAEAINPYGDGQAARRTVAAIAHRFSDAPAPDSFVPRPRTITIPLPAA  
PGQELTGSAAGRREESGT

>B\_AQUIFICAE tr|A8V4S1|A8V4S1\_9AQUI UDP-N-acetylglucosamine 2-epimerase (Fragment)  
OS=Hydrogenivirga sp. 128-5-R1-1 GN=HG1285\_04773 PE=4 SV=1

FTGTRAEYGLLKPLMYEIKKDKDLELQIIASGMHLSPEFGLTYKEIEKDGFTIDEKVEMLSSDTPFGI  
SKSIGLGVIGYTDALERLKPDIITVVLGDRFEALAFVIASFTLKIPIAHLYGGETTGLVLDDEGYRHAIK  
LSYLHFTSTEEYKKRVIQLGEEPERVFNVGALGIDNIKKLKLSSKEEVEKRLGKKLKRNLLITFHPE  
TLKKGSSNQFKELLKALDELEDTLIFTKANADTEGRKINYLIDEYASKNKEKTVVFTNMGQLLYL  
STMQFVDAVVGNSSSGIIIEAPSFKIGTINIGDRQKGRIRAESIIDCKPDYESIKKSINKLFSQNFQKLL  
NVNPNPYENKNTARKIKNILKSFELDNLEKKFFDIPVRY

>B\_ALPHA\_5 tr|B9JEP0|B9JEP0\_AGRRK UDP-N-acetylglucosamine 2-epimerase OS=Agrobacterium  
radiobacter (strain K84 / ATCC BAA-868) GN=Arad\_4847 PE=3 SV=1

MRHVMVIVGTRPEAVKMAPVIKALYARPEAFRCTVVSTGQHREMLRQTLTSFGLSVDVDLDIMQPD  
QTLASLTGAAIGACEKIFQAARPDVVLVQGDTTTTVLSASLAHYAQIPVGHVEAGLRTYERYNPFPE  
EMNRKLVTSATLHFAPTERSARQLRKEGVPPSKVFTGNTVVDALEELRGRVTTGDVSPAVRERVA  
RSQGRFVLVTCRRESFAHDLNVIVEAIAMADRFPDRFTFFFPVHLNPNVRALVMPRLNGIENVVLA  
DPVPYADILFCLSSAELVLTDSGGLQEEAPSFVGVVIVLRRTTERPEGVRAGFSRLVPIEQENIVSLASS  
WLRSHRKARLAGRPNPYGDGNAAARIVDILSKEPLR

>B\_ALPHA\_6 tr|Q11C10|Q11C10\_MESSB UDP-N-acetylglucosamine 2-epimerase OS=Mesorhizobium  
sp. (strain BNC1) GN=Meso\_3697 PE=3 SV=1

MTKKVLCIVGTRPEAIKMAPVILALKQQPWAVVHVLATAQHRQMLDQVLNFFGIVPDSLDLNVMRP  
NQDLTELTARLLVGAGEVLDRERPDVVLVQGDTTTTVMAVAIAAFYRRIALGHVEAGLRTGDIRNPF  
EEANRVIAGRLARWHFAPTEGAKQNLLREGVSEDRIFTGNTVIDALLNTAERRIDSGNLNPEGRRIV  
LITAHRRNFGEPIRRICAALKELALRNPVHLVYPVHPNPNVKEVAETMLAGLQNVQLCAPLDYAP  
FVSVMRSHLIISDSGGVQEEAPALGKPVLRDETERPEAVAEGVVKLVGTDHDIYVSQVQLLLDD  
ADAYKNMSRGVSPYGDGMASQRVIEILACDTAGRG

>B\_ALPHA\_7 tr|A8GRP0|A8GRP0\_RICRS UDP-N-acetylglucosamine 2-epimerase OS=Rickettsia  
rickettsii (strain Sheila Smith) GN=A1G\_02600 PE=3 SV=1

MLKVMTIVGTRPELIKLCVISEFDKYTHHILVHTGQNYAYELHQVFFDDMGIRKPDYFLEVAADNT  
AKSIGLIEKVDVAVLEKEKPDVLFYGDNTSCLSAIAAKRRKIPIFHMEAGNRCFDQRPVEEINRKIIDH  
ISDVNITLTHEHARRYLIFEGLPPELIFKSGSHMPEVLDRFMSKILKSDILDKLSLTKQYFLISSHRENV  
DVKNLNLKELLSSLQTLIKEYNFPVIFSTHPRTKKRLEDLEEFKELGDKIRFLPAFGFTDYVKLQMNAF  
CILSDSGTITEEASILNLPALNIREAHERPEGMDAGTLIMSGFKAERVLQSVKAITEEHENKRLQDIV  
PDYADAGLVSKKILRIVLSYVDYVNHVWFVFKK

>B\_ALPHA\_8 tr|Q2WB69|Q2WB69\_MAGSA UDP-N-acetylglucosamine 2-epimerase  
OS=Magnetospirillum magneticum (strain AMB-1 / ATCC 700264) GN=amb0102 PE=3 SV=1

MSAMAAPKVL CVVGARPNFMKIGPVIRALKGAGMAAPLVHTGQHYDEAMNDRFFADLGLPRPDV  
NLEVGSGSHAQQTAEIMRRFEPVLDLAPQALLVVGDVNSTIACALVAAKKGVTVVHVEAGLRSYD  
RAMPEEINRVLTDQISDLLFTTERDALANLTREGIDPARVHFVGNVMIDTLVMNRPRAVPATATLEAV  
GADFRTGYALVTLHRPSNVDDPVVLARLLGGLAEIARQTPLVFPPIHPRTRARIEAAGLMDRLDNART  
VLLPPAGYLEMLGLMAGARLVITDSGGVQEETALGVPCITVRENTERPITVSEGTNTVVGTD PALL  
AAWRDVLASGGKTGRIFEFDGKASERIASILYQHRL

>B\_DELTA\_6 tr|Q6MMF3|Q6MMF3\_BDEBA Putative UDP-N-acetylglucosamine-2-epimerase NeuC  
OS=Bdellovibrio bacteriovorus GN=neuC PE=4 SV=1

MKRRICVLSGTRADYGLLYWLMKELQTYSSVDLQIATGMHLSPEFGMTYKFIADGFLINEKVEML  
LSGDSVTALCKSMGLGVMGISEALARLSPDLLVVLGDRFEALAGAQAAMIHRIPIAHLHGGEATEGL  
IDEAIRHSITKMSHLHFVAEAYRNKVIQLGESPDVFNFGATGIDNIKRLPLFNREEVEERIPVLKGA  
KGPVFLVTYHPVTLNSSPEQAMADLLSAIEEFSDACVILTKSNADTAGRVINEMIDQFCLKHPERAM  
SSVSLGQKLYLSVMSIANVVVGNSSSGIIEAPAMNIPTVNIGPRQQGRAKAPSVLDCNETKSEIVSGIQ  
TVLENSFMASRKDKHVYGDGNTAVKVAEVLASYDLDGIIFKFKFYSIDGVK

>B\_DELTA\_7 tr|Q39VK1|Q39VK1\_GEOMG UDP-N-acetylglucosamine 2-epimerase OS=Geobacter  
metallireducens (strain GS-15 / ATCC 53774 / DSM 7210) GN=Gmet\_1489 PE=3 SV=1

MDKLNVMFVFGTRPEAIKMAPLVKELQKQAGQFKTIVCVSAQHRQMLDQVLQLFDIRPEYDLDIM  
KPGQDLFDITSNVLGLKPVLTKEQPDILLVHGDTTTTMSAALAAAYCRIPVGHVEAGLRTYNKFSFP  
PEEMNRRTAGALTDLHFAPTETARRNLLSEGVADTSIFVTGNTVIDALFSVIGEINANRELKESLSTQF  
QFLDPHKRLILVTGHRRENFAGGFESICRAIARIAERYPDVEILYPVHLNPNVREPVRLLGNGKLSN  
VHLIEPVDYLPFVYLMAQSYLIITDSGGVQEEAPSLGKPVLMRDTTERPEAIGAGTVKLVGTREESI  
YREAARLLDAADAYQVMSQALNPYGDGRAAERIAKCLADFPNTCMGGQLA

>B\_DELTA\_8 tr|Q6MME0|Q6MME0\_BDEBA UDP-N-acetylglucosamine 2-epimerase OS=Bdellovibrio  
bacteriovorus GN=capG PE=3 SV=1

MKKMKVMTVLGTRPEIIRLSRVLAKLDQHCEHKIVHTGQNYDFELNEIFFQDLGVRKPDFFLNAAG  
ESATETIGNIIKTVDKVMGEFLPEAVLVLDGTDNSCLSVIAAKRRKVPFIHMEAGNRCFDQRVPEETNR  
KIVDHTADINLTYSSIAREYLLREGLPPDRVIKTGSPMFEVLTHYRKQIDSSDVLRLGLKSGQYFVVS  
AHREENIESDVNFDKLVESLNLVAETFDIPVVVSTHPRTQNRIDKRGSKFHSNVRLKPLGFSDYNHL  
QLHARAVLSDSGTITEESSIMNFPALNIREAHERPEGFEEASVMMVGLDKIRIMQALRILETQPRADD  
RLLRQVADYSMPNVSDKVVRIIQSYTDYVNRVWRK

>B\_DELTA\_9 tr|Q39VI6|Q39VI6\_GEOMG UDP-N-acetylglucosamine 2-epimerase OS=Geobacter  
metallireducens (strain GS-15 / ATCC 53774 / DSM 7210) GN=Gmet\_1504 PE=3 SV=1

MNVFLVAGARPNFMKIAPLYRESLTREGVTCRIVHTGQHYDYEMSQTFFDDLQLPQPDYFLNAGSG  
SHAEQTARVMVTFEELCAKELPDLVIVVGDVNSTLACSIVAKKAGIRVAHVEAGLRSFDLSMPEEINR  
MVTDSIADLYFVTETSAVRNLFNEGKPPQIFLVGHVMVDNLLHQMVQVHLNGAVAPELRELKQKA  
GEYVFM TLHRPSNVDDDEETFRGIAFAVNEIAARIPIIFVHPRTRKMMESFGIQLHKGVTCPLPLSFS  
LYFWKDARVMTDSGGLQEETALGVPCVTIRENTERPITVEMGTNVLAGTDPDRILTRVFDAAEGR  
GKRGKVPFFWDGKAAERIWDVIGRKYGKVPDLSEACHELMECVGS

>B\_DELTA\_10 tr|A7HA71|A7HA71\_ANADF UDP-N-acetylglucosamine 2-epimerase  
OS=Anaeromyxobacter sp. (strain Fw109-5) GN=Ana109\_1410 PE=3 SV=1

MRILIVFGTRPEAVKLAPLIHDLRQRPADVEVCLTGQHREMTQVVSFFGVDVDHDL EIMRPNQTL  
SDVAARTLTGVDRILESRRPDWVIVQGDSTCLATALAAFHRKVRVAHVEAGLRSRDPHAPFPEEMN  
RVLTTPIASLHLAPTSRAKANLRAERPEDRIRVVGNTGIDALLAVQTLRDRGLDATYGARFPFLRP  
SRPLVLTGHRRESFGQPFEELCEAIRDVATGDDVDVVPVHLNPNVREPVRILSGLSNVHLVEPVE  
YPALVWLAQRSR FILTDSGGIQEEASALGKPVLMRDVTERQESVEAGVSRLVGT SREVIREACNSLL  
RDEATYARMARRVDLYGDGKASARIGDALGLPPSGASREWAAA

>B\_DELTA\_11 tr|Q30W97|Q30W97\_DESDG UDP-N-acetylglucosamine 2-epimerase OS=Desulfovibrio  
desulfuricans (strain G20) GN=Dde\_3255 PE=4 SV=1

MAKKKILFITGTRADFGKCLSLIDKVSEHTEFEYCIFVTGMHTLSRYGYTVDEVMKKYSSFRLEGGF  
RNVHVF MNQVHGESMDMVLGNTIFGLSRVSEYQPD MIVVHGDRVEALAGSIVGSLRNILVAHVEG  
GELSGTIDELIRHAVSKMAHLHFVANGDSRRRLMQMGEAEETIYPIGSPD VDLMFSPNLPSKESVLA  
YYNIPFTEYAITLLHPVTTDLEQTKK MAGAVVDAMLDSDDN YIVIPNNDHGS DIILDEYDRLSGEG  
RIAVYPSLRVESFLVLLRAAKYLLGNSSAGIRETPCYGVPSINIGSRQDGR FCCSSIINVP GSYDAIVKA  
LADV RKMVPHPPRF EFGRGNSAEQFIKILMDEKTWLT KPQKQFVDH HFALCR



>B\_ZETA tr|Q0EZA1|Q0EZA1\_9PROT UDP-N-acetylglucosamine 2-epimerase OS=Mariprofundus ferrooxydans PV-1 GN=SPV1\_07506 PE=3 SV=1  
MSDIKRMKVTVVGTTRPEIIRLSRVIACLDRSVDHKLVTGQNYDYELNEIFFQEMGIRKPDYFLNA  
VGASPVQTIGRILETIDPVLEQEAPDAMLLLGDNTSCLAVIAAKKRKIPIFHMEAGNRCFDQRVPEES  
NRKLVLDHLSINMPYSSHAREYLLREGLPADRIIKTGSPMHEVLHHYSGNIENSSVLSQLQLSPGDYF  
VVSCHREENVSDSNIRRFVHVLNSLAEKYDRKIIVSTHPRTRARLESGLVELHSHVALLKPLGFFDY  
VHLQMHAYAVLSDSGTITEESSILNFPALNIREAHERPEGMEEGSVMMVGLDLAQILQALSILETQQR  
GEQRNLRQVADYAPLNVSEKVVRIIVSYTDYINRNVWKKHL

>B\_EPSILON tr|Q7X522|Q7X522\_CAMCO PtmD OS=Campylobacter coli GN=ptmD PE=4 SV=1  
MSKRKICIVSATRAEWYLLRNLCLEIQNDKDLELQIIATGAHLSPEFGLTYKEIEKEFKIAKKIPILLAS  
DDKISLCKAMALANIGFSEAFESLKPDIIVVILGDRYEMLSVASVCLMMNLPPIAHLGCGGELTLGAIDDS  
IRHSISKMAHLHFVSTQTYKNRLLQLGEEKNRVFNVGSLASTIMKNINFLDKNELAKVLEFDLGQNI  
YLITYHPVTLNLKNSKKEIDILLKTLDELNNASLIFTKANADENGLLINEILKDYCEKNPKKAKLFDN  
LGSQKYL SIMKIAKAMIGNSSSGISESPFFKTPCINIGSRQKGRLLRTQNIIDCEFENLDQAFEKLESKDF  
KQALHHFKNPYENDKNPNIIKTCLKNANLDTILQKNFIDLRQNLGYK

>B\_EPSILON\_2 tr|A6DDY8|A6DDY8\_9PROT UDP-N-acetylglucosamine 2-epimerase OS=Caminiibacter mediatlanticus TB-2 GN=CMTB2\_04387 PE=4 SV=1  
MKNICVVTSTRAEYGLLYWLMKEIENDKKLQLQLIVTGSHLSPEFGMTIKEIEKEFKIDKKIEMLLSS  
DSKIGISKSMGLLQISIAEAFEELKPDFLVVLGDRYELIPIVSTAVVFNIPVVHLHGGEITQGAIDEYFR  
HAVTKMSYLHFTSTEEYKRVIQMGEEPNRVFNVGAFGVENIFRLKLLNKKEFEDSINFKLNKKNLL  
ITYHPETLNTQNTKKDFKEILDVLDLDELKDTNFIFTKANSDTNGRIINKMIDEYVSKNGNKAISFDSLQ  
QIRYLSALKHVDVAVIGNSSSGIIEAPSFKTATINIGNRQKGRIKAKSIIDCEPKKESIKKAFEKLYSKEFQ  
ELLKSVKNPYQKEKYPSKKVVDVLKNFEVKSSKNFYDMECKGIK

>B\_GAMMA sp|P52642|RFBC\_SALBO UDP-N-acetylglucosamine 2-epimerase OS=Salmonella borreze GN=rfbC PE=3 SV=1  
MSKVLVFGTRPEAIKMAPLVIEFKNNPAIEVKVCVTGQHREMLDQVLDFFEIEPDYDLNIMKQKQS  
LGSITCSILTRLDEILASFMPAHIFVHGDTTTFFAASLAIFYQNIKVVHIEAGLRTWNMNSPFPEEGNR  
QLTSKLAFFHAAPTLQAKDNLLRESVKEKNIIVTGNTVIDALLIGIKKITGSTGDVREIISLKNKLNLD  
KKIILVTLHRRENQGELLRTICDDIKQLALEHDDIEIVFPVHMSPRIREVNEKLSGVVNIKLVEPLAYP  
GFIWLMNNAHFILSDSGGVQEEAPSLQKPVLDVARDTTERPEVIENGAAMLVDPRIPNNIYSSCKKLLS  
DERLYEKMSQAGNPFQDGKASKKILDYFVSLEDIK

>B\_GAMMA\_2 tr|A6A3Z4|A6A3Z4\_VIBCH UDP-N-acetylglucosamine 2-epimerase OS=Vibrio cholerae MZO-2 GN=wecB PE=3 SV=1  
MKKVLIVFGTRPEAIKMAPLVQQLCQDNRFVAKVCVTGQHREMLDQVLELFSITPDFDLNIMEPGQ  
TLNGVTSKILLGMQQVLSSEQPDVVLVHGDTATTFASLAAYYQQIPVGHVEAGLRTGNIYSPWPEE  
GNRKLTAALTQYHFAPTDTSRANLLQENYNAENIFVTGNTVIDALLAVREKIHTDMDLQATLESQFP  
MLDASKKLLILVTGHRRESFGGGFERICQALITTAEQHPECQILYPVHLNPNVREPVNKLLKGVSNIVLI  
EPQQYLPFVYLMdrahiiltdsggiqeeapslgkpvvmrretterpeavaagtvklvgtnqqicda  
LLLLLTDPQAYQAMSQAHPYGDGKACQRIADILAK

>B\_GAMMA\_3 tr|Q9L9K6|Q9L9K6\_PASMU UDP-N-acetylglucosamine 2-epimerase OS=Pasteurella multocida GN=bcba PE=3 SV=1  
MFRCCNNRFLVFGTRPEAIKMAPLVEGLKKNLNFRCVTAQHREMLDQVLELFIIPDYDLDIMNQ  
TQTLSTVTSSILEKIQPVIDDYKPNVIFVHGDTATTLAASLAAYYNQIDIAHIEAGLRTNNIYSPWPEEG  
NRKLTAALAKYHFTPTQATKENLLRENIDPSKIYITGNTVIDALFLVNKKIENNTLLQKYKRNFSDFL  
GKKVILITGHRRENFQDGFENICAAISSLAELHPDVQFVYPVHLNPNVREPVNRLKNNIHLIQPL  
DYFSFIFLMKNAYLILTDSGGIQEEAPSLGKPVLMRKTTERLEAVQAETVKLVGTTQELIIDSVNELL  
TDIEAYNKMSKAHPYGDGRAVERILNVFKI

>B\_GAMMA\_4 tr|A6A5R6|A6A5R6\_VIBCH UDP-N-acetylglucosamine 2-epimerase OS=Vibrio cholerae MZO-2 GN=A5A\_0266 PE=3 SV=1  
MKVLTIFGTRPEAIKMAPLVKVLATDISIESKICVTAQHREMLDQVLALFEIVPDYDLNLMRPGQDLF  
DVTSGVLLGLRDVLNDFKPDVLVHGDTATCLGATLAIFYMQIPVGHVEAGLRTGNIYSPWPEEAN  
RVLVSKLATWHFAPTQRNKESLVQEGINPERIFVTGNTVIDALQWVVKKIQHSEEIKKQVHESLTASG  
LTSNLILDERFVLITGHRRENFQSGFENICSALKKLAQSNPETHFIYPVHLNPNVQTPVNRLGKLN  
VHLIKPLGYEAFVYLMQHSYLVLTDSGGIQEEAPGLGKPVLMRDTTERPEAVEAGTVKLVGTSVDS  
IVRELQALLNNEKYHNMALAHNPYGDGNACDRVLAVIRGQAK

>B\_GAMMA\_5 tr|A6A4N6|A6A4N6\_VIBCH UDP-N-acetylglucosamine 2-epimerase OS=Vibrio cholerae MZO-2 GN=A5A\_0249 PE=3 SV=1

MIKVLSVFGTRPEAIKMAPVIETLKNDRFDSRVCVTGQHRQMLDQVLELFEIVPNYDLNIMKPGQD  
LTDVTTGILQGLRDVFSQFKPDYVLVHGDATTTLSTTIAAYYHQVKVGHVEAGLRTNNIYSPWPEEG  
NRKVTGSLANLHFAPTSTSQNNLLAENIPADTIVVTGNTVIDALFMVRDKLNNDPELQSCFVKQDFD  
LKTGRRVVLITGHRRESFGGGFERICQAVSELATKFIDVDFVYPVHLNPNVREPVNRFSLGQPNIFLIE  
PQDYLPFVYLMDRSDIILTDSGGIQEEAPSLGKPVLMRDTTERPEAVEAGTVKLVGTDVSRINEVSI  
LLTDKQAYKKMSVAHNPYGDGAASQRILDAIARKLN

>B\_GAMMA\_6 tr|Q9AHM7|Q9AHM7\_PASMU UDP-N-acetylglucosamine 2-epimerase OS=Pasteurella multocida GN=ecbA PE=3 SV=1

MFRCNNRFLVVFGRPEAIKMAPLVEGLKKNLNFRCVTAQHREMLDQVLELFDIIPDYDLDIMNQ  
TQTLSTVTSSILEKIQPVIDDYKPNVIFVHGDATTTLAASLAAYYNQIDIAHIEAGLRTNNIYSPWPEEG  
NRKLTAAALAKYHFTPTQATKENLLKENIDPSKIYITGNTVIDALFLANRKIENNTLLQKYERNFSAFL  
GKKIVLITGHRRENFVGDGFENICAAISSLAELHPDVQFVYPVHLNPNVREPVNRLKHKKNIHILQPL  
DYFSFIFLMKNAYLILTDSGGIQEEAPSLGKPVLMRKTTERPEAVQAGTVKLVGTTQELIIDSVELL  
TDIEAYNKMSKAHNPYGDGRAVERTLNVFKI

>B\_GAMMA\_7 tr|A1S831|A1S831\_SHEAM UDP-N-acetylglucosamine 2-epimerase OS=Shewanella amazonensis (strain ATCC BAA-1098 / SB2B) GN=Sama\_2332 PE=4 SV=1

MRKISVVTATRAEYGLLRGLLEDINAASELELQLIVTGTHLSPEFGLTLRQIEEDGFCINKKVEILLSSD  
TAVGVSKSMGLALISFAEVFDELKPDILVVLGDRYELIPIVSAANIARIPVAHLSGGELTEGAIDELIRH  
SVTKMSQLHFTAMEEYSRRVVMGELPSRVFTVGEIGLDNLKRIQLSSKVEFENSIHRKLMKPNLLIT  
YHPETTQEVKVRNDFELILKALDQLDNTLLIFTNANSVGGRSVNMIDEYVDSHPEKSIAFTSLG  
VKRYLSALQYVDAVVGNSSSGIVEAPSFRIATINIGERQKGRVRASSVVDVDVDSEQILKALEAIYSD  
DFKAHLKETVNPYKGDVQKVIKAVLKSVDLDSLKRKPFYDLTIG

>B\_GAMMA\_8 tr|Q9CM35|Q9CM35\_PASMU UDP-N-acetylglucosamine 2-epimerase OS=Pasteurella multocida GN=wbjD PE=3 SV=1

MKKLKVMTVVGTRPEIIRLSRVIVACDKHFQHILVHTGQNYDYELNEVFFHDLGIRKPDYFLNAAGK  
TSSATIGNVIIAVDQLEETQPEALLVLGDTNSCLAVLPAKRRKIPTFHMEAGNRCFDMRVPEEINRRI  
VDHTADINLTYSTIARDYLLAEGLSPLIITGSPMFVLFHFYHEQIKHISKILDKLGLTPFQYFVSAH  
REENINSEPHFLDLIHTLNAVAKKYQYPVIVSTHPRTRKRIEELNITFHPLIQLLPLGLFDYKQLQM  
AKATLSDSGTINEESSILNFPALNLRQAHERPEGMEEAAVMLVGLQAERVLQGLAILDEQRRGQERD  
LRLVADYSMPNVSAKVRILLSYTDYVNRVIWKKY

>B\_GAMMA\_9 tr|A5IGF4|A5IGF4\_LEGPC N-acylglucosamine 2-epimerase OS=Legionella pneumophila (strain Corby) GN=neuC PE=4 SV=1

MIRKIIYVTGTRADYGLMREVLKRLHQSEDIDLICVTGMHLDALYGNTVNEIKADQFSICGIIPVDL  
ANAQHSSMAKAIGHELLGFTEVFESETPDVLLLGDRGEMLAIAAIAIHLNIPVVHLHGGERSGT  
DEMVRHAISKLSHYHFVATEASKQRLIRMGEKEETIFQVGAPGLDEIMQYKTSTRDVFNQRYGFHPD  
KKICLLIYHPVVQEVDSEIKIQFQSVIQAALATNLQIICLEPNSDTGGHLIREVIQYIDHPDVRIKHLHR  
PEFIDCLANSVMLGNSSSGHIEAASFNLNVNVGSRQNLRRSDNVIDVDVTDAILTGLREALNKP  
KIKYFNCYGDGKTSERCYQLLTIPLHSQILNKCNAV

>B\_GAMMA\_10 tr|Q48ML9|Q48ML9\_PSE14 UDP-N-acetylglucosamine 2-epimerase OS=Pseudomonas syringae pv. phaseolicola (strain 1448A / Race 6) GN=PSPPH\_1083 PE=3 SV=1

MAGQQPRMKVLSIFGTRPEAIKMAPLVRALAAEPGIDSRICITGQHQSMLQQVLDMFELKADYSLD  
VMRPDQTLNSLTAALYAAIDPILDEMCPDKVLVHGDTTSAMVAAMSAFHRRIPIGHVEAGLRTGDIR  
QPWPEEMNRRCIDLSDHLFAPTAESRRNVLGERLQGISFVTGNTVIDALHLTAQRIDSNRQLRHLD  
RQFSFLVPERVVLVVTGHRRENFVGDGFNLNICKALGELARRDDIIVYPVHLNPNVLPVTEHLGDLP  
NVHLIKPLDYLDFVRLMQRRAHVILTDSGGVQEEAPSLGKPVLMRVDTERPEAVAAGTVRLVGTET  
DAIRGVNALFDDDALWQRASHAANPYGDGKASARIVDALMGRPVDVFAELPRYRTDPVDVQLD  
TLIQPQPQHQNQMRS MAG

>B\_GAMMA\_11 tr|A1S7W0|A1S7W0\_SHEAM UDP-N-acetylglucosamine 2-epimerase OS=Shewanella amazonensis (strain ATCC BAA-1098 / SB2B) GN=Sama\_2261 PE=3 SV=1

MAKKKVLTVFGTRPEAIKMAPLVNALASDDRFEAKCCVTAQHREMLDQVLELFEITPDYDLMLK  
AGQTLNEVTAGIIQKLKPVLQEFKPDVVLVHGDTATTFAASLAAYYEQIAGHVEAGLRTGNIYSPW  
PEEANRRLTGVLTKYHFAPTETSKQNLLKENFEPSNIIVTGNTVIDALLMVKEKIDSDTDLNHTIAEQF  
PFIDENKKLILVTGHRRESFGGGFERICEALATVARMHSDVQILYPVHLNPNVREPVNRLGDIDNIFLI  
EPQQYLPFIYLMDKAYIILTDSGGIQEEAPSLGKPVLMRDATEPEAVEAGTVKLVGTDVKRIVSSL  
NELLCDDLAYQHMSVAHNPYGDGKACHRILKALI

>B\_BETA tr|Q79DD9|Q79DD9\_NEIME GlcNAc-6-P epimerase OS=Neisseria meningitidis GN=synX  
PE=4 SV=1

MKRILCITGTRADFGKCLKPLLAYIENHPDLELHLIVTGMHMMKTYGRTYKEVTRENYQHTYLFSNQI  
QGEPMGAVLGNTITFISRLSDEIEPDMVMIHGDRLEALAGA AVGALSSRLVCHIEGGELSGTVDD SIR  
HSISKLSHIHLVANEQAVTRLVQMGEKRRKHHIIGSPDLDMASSTLPSLEEVKEYYYGLPYENYGISMF  
HPVTTEAHLMPQYAAQYFKALELSGQNIISIYPNNDTGTESILQELLYQSDKFIAPFSIRFEYFLVLL  
KHAKFMVGNSSAGIREAPLYGVPSIDVGTRQSNRHMKGSIHTDYETKNIFDAIQACSLGKFEADD  
TFNGGDTRTSTERFAEVINNPETWNVSAQKRFIDLNL

>B\_BETA\_2 tr|Q79DN7|Q79DN7\_NEIME SiaA OS=Neisseria meningitidis GN=siaA PE=4 SV=1

MKRILCITGTRADFGKCLKPLLAYIENHPDLELHLIVTGMHMMKTYGRTYKEVTRENYQHTYLFSNQI  
QGEPMGAVLGNTITFISRLSDEIEPDMVMIHGDRLEALAGA AVGALSSRLVCHIEGGELSGTVDD SIR  
HSISKLSHIHLVANEQAVTRLVQMGEKRRKHHIIGSPDLDMASSTLPSLEEVKEYYYGLPYENYGISMF  
HPVTTEAHLMPQYAAQYFKALELSGQNIISIYPNNDTGTESILQELLYQSDKFIAPFSIRFEYFLVLL  
KHAKFMVGNSSAGIREAPLYGVPSIDVGTRQNNRHMKGSIHTDYETKNIFDAIQACSLGKFEADD  
TFNGGDTRTSTERFAEVINNPETWNVSAQKRFIDLNL

>B\_BETA\_3 tr|A8V8Z2|A8V8Z2\_NEIME SynX OS=Neisseria meningitidis GN=synX PE=4 SV=1

MKRILCITGTRADFGKCLKPLLAYIENHPDLELHLIVTGMHMMKTYGRTYKEVTRENYQHTYLFSNQI  
QGEPMGAVLGNTITLISRLSDEIEPDMVMIHGDRLEALAGATV GALSSRLVCHIEGGELSGTVDD SIR  
HSISKLSHIHLVANEQAVTRLVQMGEKRRKHHIIGSPDLDMASSTLPSLEEVKEYYYGLPYENYGISMF  
HPVTTEAHLMPQYAAQYFKALELSGQNIISIYPNNDTGTESILQELLYQSDKFIAPFSIRFEYFLVLL  
KHAKFMVGNSSAGIREAPLYGVPSINVGTRQSNRHMKGSIHTDYETKNIFDAIQACSLGKFEADD  
TFNGGDTRTSTERFAEVINNPETWNVSAQKRFIDLNL

>B\_BETA\_4 tr|Q82SQ8|Q82SQ8\_NITEU UDP-N-acetylglucosamine 2-epimerase OS=Nitrosomonas  
europaea GN=wbpI PE=3 SV=1

MQKKVYLIAGARPNFMKIAPIVRALQQQDRITYKIVHTGQHYDREMNDVFFEELGIPQPDIFMAAG  
GGSHSQQTAKIMVAFEEYCQTEPPDAVLVVGVDNSTLACSIVAKKLHIPVAHVEAGLRSGDMCMPEE  
INRLVTDSDITDWWFVTEPSGQQHLLQEGKPASAIHYVGHVMVDNLLYQVEQLARADTSNFETSQKKT  
SLGNQSYGVVTLHRPSNVDSPDALERISLTLKQIAKRLPLVFPAPHPRTQNNLKKFNIDLGNILLMGP  
QAYMPFLHLWKDATALVLTDSGGLQEETALGVPCITIRENTERPITVNEG TNILAGTRPERILAAVDDI  
LGGRGKQGRPHLWDGNAARRIVEILTRELHP

>B\_BETA\_5 tr|Q82X14|Q82X14\_NITEU UDP-N-acetylglucosamine 2-epimerase OS=Nitrosomonas  
europaea GN=rffE,wecB,nfrC PE=3 SV=1

MKILIVVGTRPEAIKMAPVILALKKEPWANVRVLATAQHRNMLDQVNEFFGIDPDI DLNIMRPNQAL  
TTLTARLLPELDDVLQAEKPD AVL VQGD TTTVM TVALACFYHHIPVGHVEAGLRTWDMQNPFPEEA  
NRVITGKFARWHFAPTEGSRQNLKKEGVADSKIIVTGNTVIDALLMSASKDLQLGIELDSNKRLVLT  
SHRRENFGEFERNICRALQTLAEKNPDVQFLYPVHPNPNVKDVAHEFLAGLHNFTLCEPLDYASFAA  
MKRAYIILTDSGGIQEEAPALGKPVVLRLDETERPEAVEQGVV KLVGPNYDAIVQETQCLLDEFAYR  
AMARGISPYGDGKAAERIVQVLRKYFT

>B\_BETA\_6 tr|Q63IQ3|Q63IQ3\_BURPS UDP-N-acetylglucosamine 2-epimerase OS=Burkholderia  
pseudomallei GN=wecB PE=3 SV=1

MKKILLAFGTRPEAIKMAPLVRMLQTRADV DARVCVTAQHRQMLDQVLALFDIAPAYDLNVMRQS  
QTLADVTTGILQTI GAVFDDFD PDIVLVHGDTTTT LAVSLAAFYRYLPIGHVEAGLRSGDIWSPWPEE  
LNRRVTD AVSSWHFAPTERAQHNL FSEGVP TQGVVLTGNTVIDALQDVKRMLDADAPLAREIAAQF  
PFLGHD ERVVLTGHRRESFGEPFAHFCDALRTLARRYPGVRFVYPLHLNPNVQGP AHALLDGLPNV  
HLIAPQEYLSFVFLMSRAHFII TDSGGIQEEGPALGKPVLVTRD TTERPEAIQAGTARLVGTDTERIVG  
EASRLDDDDAYDEMSRATNPYGDGHASERIAHALLNMPHAADTARFPLAAIEAPCNALALGLRAL  
RSA

>B\_SPIROCHAETES tr|Q8VTY7|Q8VTY7\_LEPIN UDP-N-acetylglucosamine 2-epimerase  
OS=Leptospira interrogans PE=3 SV=1

MKCLKVSTIIGTRPEIIRLSRVLAKLDQYCDHIMIHTGQNYDYELNEIFFNDLEIRKPDYFLNAAGTSG  
AATIGNVVIKVDDELLAQVQPDVAVLVLGDTNSCMAVIPAKRRKIPIFHMEAGNRCFDQRVPEEINRRIVD  
HTADINLTYSNIAREYLLREGLPSDMVIKTGSPMFEVLNYYLEGIKKSDILEKLIKISEGKYFVVSAHR  
EENIDSDKNFAKLIDIINTIAEVFKFPVIISTHPRTQKKINVSNSVFNPLVQLLPLGFKDYNNKLQLSAK  
AVLSDSGTITEESSILNFPALNIREAHERPEGMEEASVMMVGLEKERVQLVQLQILEKQPKGEGRLRN  
VSDYSMPNVSEKVVRIIHSYTDYVNRVIWKY

>B\_SPIROCHAETES\_2 tr|Q9AEF1|Q9AEF1\_LEPIN UDP-N-acetylglucosamine 2-epimerase  
OS=Leptospira interrogans PE=3 SV=1

MKCLKVSTIIGTRPEIIRLSRVLAKLDQYCDHIMIHTGQNYDYELNEIFFNDLEIRKPDYFLNAAGTSG  
AATIGNVVIKVDDELLAQVQPDVAVLVLGDTNSCMAVIPAKRRKIPIFHMEAGNRCFDQRVPEEINRRIVD  
HTADINLTYSNIAREYLLREGLPSDMVIKTGSPMFEVLNYYLEGIKKSDILEKLIKISEGKYFVVSAHR  
EENIDSDKNFAKLIDIINTIAEVFKFPVIISTHPRTQKKINVSNSVFNPLVQLLPLGFKDYNNKLQLSAK  
AVLSDSGTITEESSILNFPALNIREAHERPEGMEEASVMMVGLEKERVQLVQLQILEKQPKGEGRLRN  
VSDYSMPNVSEKVVRIIHSYTDYVNRVIWKY

>B\_SPIROCHAETES\_3 tr|Q9S4G9|Q9S4G9\_LEPIN UDP-N-acetylglucosamine 2-epimerase  
OS=Leptospira interrogans PE=3 SV=1

MFKVMTIVGTRPELIKMSRVIAELDRNFKHILVHSGQNYDYELNQQVFFEDLEIRKPDHFLNAAGESA  
AATIAQVLLKADEVFEKEKPDALLYGDTNTCLAVISAKRRKIPIFHMEAGNRCFDQRVPEELNRKV  
VDHLSINLVLEHARRYLLAEGIKPETIITGSHMDEVLYYKAKIEKSDILEKIKLEKNKFFIVSSH  
REENVNTVENLKKLLESNAICEEYGLPVIVSTHPRTKRLEDKFKEVEMNPLITFLKPFQFFDYVQLQ  
MSAFCILSDSGTITEEASLLDPAVTIRNTHRPEGMDVGTLMISGLSKERILESVRIVVDQYRAGIRH  
YRVVDDYSAGQVSKKIVSIVQSYTDYINRTVWHKS

>B\_CHLOROBI tr|B3EI03|B3EI03\_CHLL2 UDP-N-acetylglucosamine 2-epimerase OS=Chlorobium  
limicola (strain DSM 245 / NBRC 103803) GN=Clim\_2390 PE=3 SV=1

MKLLLLAAGGKPGALLLAPLYNALKKNIGIFKPVAVFAAAQSAEPLSRELATCFGIGEAGHTITLGED  
SPGQQLAAVITGMEPIIAREQPVLVMVCGSDNAALGAALAATKLGVPVAVADAGLRCHDRSDADEIN  
RILIDSIADLHFISEHSGEYNLINEGVADEKVVFFSGNLSIDTLAVLMEQAERDTIAAELGLQPKKYALV  
LLNPAGAIAREPLEMTLRLKMSGLTTLVPLAAGLDELMKQHKLDKAFGGVEGLVMIAHPGH  
AGLLTLRDSVLLITDSEELQAESTVMNVPCLTMMDNTPATIEIGTNVVLGVDEEDIMSRIDILHS  
GEHAHSSKRNIPEKWDGAAASRIVEVLGRVL

>B\_SPIROCHAETES\_4 tr|Q8F5M5|Q8F5M5\_LEPIN UDP-N-acetylglucosamine 2-epimerase  
OS=Leptospira interrogans GN=wecB PE=3 SV=1

MKCLKVSTIIGTRPEIIRLSRVLAKLDQYCDHIMIHTGQNYDYELNEIFFNDLEIRKPDYFLNAAGTSG  
AATIGNVVIKVDDELLAQVQPDVAVLVLGDTNSCMAVIPAKRRKIPIFHMEAGNRCFDQRVPEEINRRIVD  
HTADINLTYSNIAREYLLREGLPSDMVIKTGSPMFEVLNYYLEGIKKSDILEKLIKISEGKYFVVSAHR  
EENIDSDKNFAKLIDIINTIAEVFKFPVIISTHPRTQKKINVSNSVFNPLVQLLPLGFKDYNNKLQLSAK  
AVLSDSGTITEESSILNFPALNIREAHERPEGMEEASVMMVGLEKERVQLVQLQILEKQPKDEGRLLRN  
VSDYSMPNVSEKVVRIIHSYTDYVNRVIWKY

>B\_SPIROCHAETES\_5 tr|Q8F5Q7|Q8F5Q7\_LEPIN UDP-N-acetylglucosamine 2-epimerase  
OS=Leptospira interrogans GN=LA1610 PE=4 SV=1

MKRKICVITGTRADYGLLRWLILEISKSSKLDLQIATGMHLSPEFGLTYKEIENDGFLIHKKIEILLSSD  
STVGVSIGLGLIGFSEAFADLNPDILVLGDRFEILAATVAALISRIPVAHLHGGETTEGAFDEGIRHS  
ITKMSHLHFVAANEYRNRIIQLGEDPSNVFLVGGMGIDGIKSNLLKKEELESSNIKFKNNLLITFH  
PVTLEESTAKVQMIELLSLETLSPEIGLIFTMPNADTDGRIIFELVKEFTSSHSNAWYFTSLGQTRYLS  
CLQFVDAVVGNSSSGIEAPSFKIGTINIGDRQKGRRLRAKSIIDCEPKKIEIDAFKRLYSSDFQKNLSTT  
VNPYGEGGASEKIVRILEKIDIQILKKKFFNLQF

>A\_CRENARCHAEOTA tr|A1S0Y0|A1S0Y0\_THEPD UDP-N-acetylglucosamine 2-epimerase  
OS=Thermofilum pendens (strain Hrk 5) GN=Tpen\_1715 PE=4 SV=1

MTKVVSIVGARPVFKLAAVAETFDREFEHTVIHTGQHYDYEMSKVFFEQRLRLRDPDIHLGVGSGS  
QGYQVGEIVKKAEEHLKSINPDVVVVYGDNTSLAGALAAKAGYPVAHVEAGLRSHDMKMQEEI  
NRRVVDHVSALLFAPTPSARDNLLKENVPGKVFLTGDVHVDVLQKWIESIQRSNILGRLGLLEGEYV  
MATIHRAENVDDPAKLAEVKCLKELAALTKVVFPIHPRTSRRAEEAGLEKELYSNPVATKPLGYV  
DFLRLVTGSKLVVTDSSGGVQREAYLLGKPAIVLRDRTEWIELVQAEWVRLADANPARLVQEYKLL  
EKPPAPQPGLLGDGKAAERITKTISELMRR

>A\_KORARCHAEOTA tr|B1L6H3|B1L6H3\_KORCO UDP-N-acetylglucosamine 2-epimerase  
OS=Korarchaeum cryptofilum (strain OPF8) GN=Kcr\_1306 PE=4 SV=1  
MRLIISVGTRPEIIKMAPLYEALSKLNEIELLVHTGQHYDWEMSGIFFKELGVEEPDINLNIGSDDQV  
SQTSAVMKEIGKIIIESYEPDGVIAVGDNTNSVLGTAIAASKMEVFFIHVESGLRSYDFSMPEEINRRISDH  
LASLNFAPTSRAFSNLMEEGISPKTTFLSGNTIVDSVIKVLKRVSAKRTLEKFDLDGAQPLVTLTLHRK  
ENTEYEHKLIGVLKALEELDDITFVWPIHPRTQKALKTFDLWNKLSLKNVRILEPLGYLDFLGLLLIS  
SDLVMTDSGGVQEEAATLKRPCIILRENTERPEIEMGFGEIAGTNPTAIIISLVRKYLYQANLIERLKRT  
PNPFGDGSSSKIIASVIQRIWDLKSLRRPPTFKGGSPHYLAFRVDESMRGYTVASFREACGYDVVSIY  
DASGRAIHFDEGTPLIPNYIVRVRGDPVNYGRFKKLVKI

>A\_EURYARCHAEOTA tr|Q46GF0|Q46GF0\_METBF UDP-N-acetylglucosamine 2-epimerase  
OS=Methanosarcina barkeri (strain Fusaro / DSM 804) GN=Mbar\_A0052 PE=4 SV=1  
MRIASIVGVRPQFVKASVVSRELKKNNEIILHTGQHYDYQMKNLFFEEELNIPEPEYHLDIGSGSHGY  
QTGEMLKKEEVLIKEKPDVLVLTGDTNSTLAGALAASKLHIKTAHVESGLRSFDKAMPEEINRIVTD  
HCSDILFCPTENAVENLNKNEGITKNVYLTGDVMVDSLLYNRKIAEDKSTILNDLGLQSKGYLVATIHR  
ASNTDNEENLNKIVNAFSELKETIVFPLHPRTDKFLKKGlyDRLKSSVILIEPLGFFEFIKLMNNAK  
MILTDSGGVQKEAYVLKVPICITLRENTEWETVNDENWVNLVGTNKEKIVKMKVKEFRPFLEKHRDRF  
GNGDASKNILLIIDCLKKQEVNL

>A\_EURYARCHAEOTA\_2 tr|Q9V179|Q9V179\_PYRAB WlbD UDP-N-acetylglucosamine 2-epimerase  
OS=Pyrococcus abyssi GN=wlbD PE=4 SV=1  
MRPAIIFGTRPEIIKLSPVIRAFIKNDIQPILHTGQHYDYEMSSIFLEELPEIDYHLEVSGGTQAEQT  
GIAMIKIEKVLNNEVPDVSIVQGDNTVLAGALASVKLLIPVAHVEAGLRSFDRMPPEEINRILADHS  
SEVLFAPTLEAKKNLEREGIRENVFVVGNTIVDAVLQNSKIAEKSKILSELGLEPKSYILVTAHRKEN  
VDNKDRLKKLVDILTSLPMQVVPVHPRAEKRLKEFGLWDRKSSGVMLLKPLGYLDFLKLEKNA  
FIVMTDSGGIQEEAHLNVPCLTLRYNTERPETVKAGGNILVGVKDLALRYVKKLIEDEAFYKRMAS  
AKNPFGDGRSGERIVSILMTLWESGRLKVKTSNFITPQKA

>A\_EURYARCHAEOTA\_3 tr|Q9HM99|Q9HM99\_HALSA UDP-N-acetylglucosamine 2-epimerase  
OS=Halobacterium salinarium GN=uae PE=4 SV=1  
MDAAPTIIYEDRLAAQMDRGDFVLAVVTATKPDFYKQAPVVAEAEANDVPCFVIHTGQHYDDVLGH  
GLEEYGIPIHIAADLGIRGDLTQKTAEMMLAVKTLAERLEAWPDTTVLPMVHGDTHAAGVFPQAW  
MFATNQVAHNEAGLRGMAYETTTDDPAVIREQWRGDWHVERTEPFPEQYDTFVGSAAISYQFA  
PVALNREHLEREGYPRSDGHERMPVVGNSVVDIAEMKRDHDGESVFDVYPVLEARDWLRVDIH  
RRANLLPERFTAIVEGVIELVERGYNVNFVELNATKRALENYGYRERLQRLADERENFLFTGLWKK  
HAHVYEFLESGQCFAEFTDSGSMQEELNEIEAALCLTARFSTDRPETVFDANTNLLVPPTSGAFVAD  
MITHVAETDDVRERMRSQALYGADVGEIIVEFLQARADDGVFDWAHERLGFADAGSEQAFDYL

>A\_EURYARCHAEOTA\_4 tr|Q46AM3|Q46AM3\_METBF UDP-N-acetylglucosamine 2-epimerase  
OS=Methanosarcina barkeri (strain Fusaro / DSM 804) GN=Mbar\_A2140 PE=4 SV=1  
MKIVSIVGARPPFIKCAPLSRLIREKHEEILHTGQHYDTGMSDIFFDELKIPKPNYNLGVGSNSHGVO  
TGKMLIEIEKILLRESPDLVLVYGDNTNSTLAGDLAASKLHIKTAHIEAGLRSFDRSMPEEINRVLTDHT  
SDLLFCPTETAVLNKKEGITTGVYNVGDVMLDSLKYNIRIAEQKATILGKLNLSKEYIVATVHRAS  
NTDSFENLSSITNAFCHTGVSIIVFTVHPRTEKYLKQYGLWNKLCVKVVPPLGYLEMLKLMVHAK  
KILTDSGGVQKEAYMLGVPCITMRENTEWVETIEDGGNVLVGTDYKIMDAILNFKGVPVKGNFFG  
NGNACAEICKTLNKL

>A\_EURYARCHAEOTA\_6 tr|A6UU99|A6UU99\_META3 UDP-N-acetylglucosamine 2-epimerase  
OS=Methanococcus aeolicus (strain Nankai-3 / ATCC BAA-1280) GN=Mao\_0485 PE=4 SV=1  
MKIAIILGTRPEIIKLSIIRELQNFSENFYSCKTCEANLKHNSNTHKDNKNIEYFIIHTNQHYSKNM  
DEIFFKELNLPTPKYNLNVGSGTHGEQTAKMIDGIEKILISENPDVVIVQGDNTVLAGALSASKLHI  
KVAHVEAGLRSYDRNMPEETNRVLTDHISNYLFAFTEIAKHNLKKEGINKNVFVVGNTIVDATIQNIE  
IAENIYKYNMSIKTNINEDYFLTLHRAENTDNKERLTNIVNAIIKATEQYNKKIIFPMHPRTEKCLK  
EYNLFENLQKNSKIEIIEPVGYLEFLLEKNAKLILTDSGGVQEEACILGAPCITLRDNTERPETIYIGS  
NILVNADINKILDGIGVMANKKINGNNPFGDGNSGKAIVKILLEN

>Saccoglossus2 XR\_086474.2 PREDICTED: Saccoglossus kowalevskii UDP-N-acetylglucosamine-2-epimerase/N-acetylmannosamine kinase-like (LOC100367162), miscRNA

QRCRDGIVGISIPDFGRSTPQFMDGKKDPHDVFMVYQNGFQNGHRRTSSSSSLGSESLDRPMRVCVAT  
CNRADYSKLA PIMLGLKEDKDFQLQVIVMGCHLIDDYGSTYRMIEQDKIKIDAKLHTIVRGEDEAA  
MVESVGLALVKLPDIFLRLKPDILIVHGDRFDALSTATAAALMNIRIIHIEGGEISGTIDDCIRHSITKLA  
HYHVCCTERARGRLQAMCEDNERILLAGCTS YDMLLKSNTKNCQLIIDRWVEKGVKPKKEYIALQH  
PVTTDLHNSLKMFDLTLEALLEFGKKT VLLFPNIDAGSKDMTRILRRKKIENHPNFSTAKHIPFEFIV  
LVANCACIIGNSSAGVREAGAFGTPVINLGSRQTGRETGENVMHCRDADTKEKILHALELQYQKQY  
PPSYIYGDGHA VRSRIIKFMKELDVIDSIQKQFIFPPMPDGV SQDIDHILEIQSAIAVDLGGTNLRVSI VSK  
AGEIMHMMSKPTPSDNTARMESLLTLLVDASQIATKLNCRVLGVGVSTGGRVNPHEGLVMHSTKSL  
EGWSAIDLRTPISSALHLPVWVDNDGNCAALGERKFGHGK GKEDFLAIATGTGIGGGVLVNLGRVH  
GSNFC AAELGHIAV SIDGPACMCGSSGCVEAYSSGLALMREAKKLHQAGELIVDGMKMT?  
NEIISAKHLIQA AKLGNKKA EKIIHLGGEALGTAVISILHLLNPTLVVLCGVLAPTYVDIVRETIENKAL  
PSARGVKVQV SLLKEPALMGAASLVLEYATRRIY

>Strongylocentrotus1 gi|115637356|ref|XP\_795233.2| PREDICTED: similar to UDP-N-  
acetylglucosamine-2-epimerase/N-acetylmannosamine kinase [Strongylocentrotus purpuratus]

MVEIAFNRFNLQQHQ RKL SGTMTSLNGSGVKANCGGDM DTKRKFRCVATTNRADYSKLG NIMQ  
AIKDDEMLELSTIVLGCHLIDDYGSTYRLIEKDGFTID SRLHTIVRGEDEAAMVESVGLAMVKLPDI  
MLRLKPDVVIVHGDRFDVLSLAACAALMNIRIVHVEGGEVSGTIDDSIRHTISKLAHYHVCCTERAH  
KRLLAMCEDNDRILLAGCPSYDKLLSTDV VDCQHILNRWLK GEGKSKEYIVALQHPVTTNIADSLK  
MYSLMVDALMEFNKRVI MLFPNIDAGSKDIVRIMRQKGVETNPMFYPVKHIPFEFIIIVANAGCMI  
GNSSAGVREAGAFGTPVVNLGSRQTGRETGENVLHCRDADTTQKIIHHALEIQYQRQFPPSYIYGDG  
HAVPRIIKFLKSIKQEDTIQKQFIFPPMPESP SIDIDHILETQSALAVDMGGTQLRVALIAADGEIKLRRS  
RPTPHTTNE DRMKALLELLEATKESYALNCRVLGVGISTGGRVNSKEGLVMHSTKAIAGWDEIDLR  
TPIETTLHLPVWVDNDGNCAALGERKFGHG RGVKDFITATGTGIGGGIVLDKRLIHGTNFCAAELG  
HIKVS LDGPACQCGSHGCVEAYSSGMAL KREAMKLHEAGELLVDGMIVEK GEEVTAKHLVQAAKT  
GNQKAKKILDTGAQALGTAITSL LHVLNPKLVILCGVLSNVYLEP VREAVKTHSLPSAVSEVEIVSSQ  
LVEPALLGAASLVLEYATRRTY

>Symsagittifera JF826132

MKIAVATCNRADYSKLA PVLRLGLKQDTTFQVSIVVMGSHLIDDYGNTYRFIERDGNQIDSMLHTLVR  
GETEGAMVESMGLAMIKLPDILNRLQPDIVMVHGDRFDAMSV AISAAVMNVRVLHLEGGEVSGTID  
DVIRHSITKLAHYHICCTKGARLRIESMCE DSSRVLLAGCPAYDELIHTDVSKYHEAFERWLPNHVGT  
KNFIICVYHPVTTAIAESIQHFGLLLDALVHF DVRTVILFPNV DAGSKELVRCIRLRNLENHEKISCYK  
HVPFSEFVYLMGNCGLMIGNSSAGIRESNVFGTAVINIGTRQRGRQSGANVVHVKNPTS AEDLLWHI  
RSQFGKVYPRDYIYGDGRAVERIVKFIKEIDCDSPVEK SFNFDRNSSGLRAPSKASFGAEFPLSRQAH  
SLQLALAVDLGGSFIRVALVDDRGNIERMRRTEMVDCPDERIAIIVRMANDLLENKRDLVVG VGVST  
GGRVNSETGEILFATKVL SGWGGVALKTRLQEQLGLPCYVENDGNCAALAEVHFGSHKMEDMVVL  
HFGTGIGGGIIQDGCLLNGSSYSAGEFGHIVCFDDGPD CMCNGSGCVEAYAGGWALNKLAKEMEL  
SSNWRKEGADDQKPVTPGQPNKPTYLTDL ASDGVYAVQHINRAVR AVASALLTIYSSYNPPVAILA  
GPLAPVYFDGVKNKLEERSAILGRNF TLLQSDMTEMSLKGAATLV LNNPSRAVPQNAIV\*

>Takifugu tr|Q4W392|Q4W392\_TAKRU Putative UDP-N-acetylglucosamine 2-epimerase/N-  
acetylmannosamine kinase (Fragment) OS=Takifugu rubripes GN=glcne PE=2 SV=1

MFGLKSHPDEFEELEVVLGSHLIDDYGNTFRMIEQDDFDIGSKLHTIVRGEDEAAMVESVGLALVKL  
PDVIQRLHPDILVVHGDRFDALALATAAALMNIRILHVEGGEVSGTIDDSIRHAISKLAHYHACCTRM  
AEQH LIAMCEDHSRILLAGCPSYDKLLLSHQKEDYMDI KSWLGDNVKEHDYIVALQHPVTTDIKNS  
IKIYGLMLDALLSFNKTTLILFPNIDAGSKEMVRVMRKKGIEQHPNFRAVKHIPFEQFIQLVNHAGCM  
IGNSSCGVREAGAFGTPVINLGT RQTGRETGENVLHVRDADTHNKIYHALELQFGKRYPCSKIYGDG  
NAVPRILKFLSSIDLDEPLQKTF CFPVKDPISQDIDHILETQSALAVDLGGTNLRVAIICMRGNIVRKY  
TQANPKTFEARMQLILKMCSDAMRDAVFLNCRILGVGVSTGGRVNPQEGVVLHSTKLIQEWSAVDL  
RTPISDALHLPVWVDNDGNCAALAEKKFGHGKGVENFVT VITGTGIGGGIIHQNELVHGSTFCAAEL  
GHIMVSFDGPECSCGSRGCIESIASGMALQREAKRLHDEDLLKVDGLDMKISDPITAAHLINAARLG  
NSKANIVLNKASTALGMGIINILHIMNPSLVILSGVLGSYYQAPVQRTIMERALFSAQSVKVVISDLEE  
PALLGAASMVL DYATRRIY

>Tetraodon tr|Q4RJ92|Q4RJ92\_TETNG Chromosome 18 SCAF15038, whole genome shotgun sequence  
OS=Tetraodon nigroviridis GN=GSTENG00033530001 PE=4 SV=1

MTRVGSAAAPRAAGQSQSPAPPVQSSPSPCRIAMTTPPSASFSPFFSNATGFCKLRTL MNAGIKTE  
LYSWRMQRGRVKMDRRR MEDQNQCRKKLRVCVATCNRADYSK LAPIMFGLKSH PDEFEEV VVL  
GSHLIDDYGNTFRMIEQDDFDIGSKLHTIVRGEDEAAMVESVGLALVKLPDVLQRLQPDILLVHGDR  
FDALALATAAALMNIRILHLEGGEVRS GTIDDSIRHAISKLAHYHACCTRMAEQHLIAMCEDHTRILL  
AGCP SYDKLL LTHHKEDYMDI IKS WLGD KVKDHDYIVALQHPVTTDIKNSIKIYGLMLDALLSFNKT  
TLILFPNIDAGSKEMVRVMRKKGIEQHPNFRAVKHIPFEQFIQLVCHAGCMIGNSSCGVREAGAYGTP  
VINLGTRQTGRETGENVLHVRDADTHNKIYHALELQFGKRYPCSKIYGDGNVPRILKFLRSIDLEEP  
LQKTFCFPPVKDPISQDIDHILETQSALAVDLGGTNLRVAIICMRGKIVKKYTQANPKTFEARMQLILK  
MCSDAVRDAVFLNCRVLGVGVSTGGRVNPQEGVVLHSTKLIQEWSSVDLRTPI SDALLPVWVDND  
GNCAALAEKKFGHGKGVENFVTVITGTGIGGGIIHQNELVHGSTFCAAELGHIMVSFDGPECSCGSR  
GCIESYASGMALQREAKRLHDEDLLKVDGMDLKISEPITAAHLINAARLGNSKANIVLNKASTALGM  
GIINILHTVNPSLVILSGVLGSYYQAPVQRIISERALFSAHSIKVVTSDLEEPALLGAASMVL DYATRRT  
Y

>Xenopus gi|118404390|ref|NP\_001072728.1| glucosamine (UDP-N-acetyl)-2-epimerase/N-  
acetylmannosamine kinase [Xenopus (Silurana) tropicalis]

MEKNINQRKLRVCVATCNRADYSK LAPIMFGIKAEPDRFVLSVVVIGSHLIDDYGNTYRMIEQDDFD  
IQARLHTIVRGEDEASMVESVGLALVKLPDVLNRLNPDII VVHGDRFDALALATS AALMNIRILHIEG  
GEVSGTIDDSIRHSITKLAHYHACCTRS AEQHLIAMCEDHDRILLAGCP SYDKLLSVNNKDYMSVIK  
MWLGDDAKSGEYIVALQHPVTTDIKHSIKMF EFTLDALLSFNKKTLILFPNIDAGSKEMVRVMRKK  
GVEHHPNFRAVKHVPFEQFIQLVAHAGCMIGNSSCGVREAGAFGTPVINLGTRQTGRETGENVLHV  
RDADTQNKIIHALQLQFGKRYPCSKIYGDGNVPRIVKFLKSISLDEPLQKKFCFPVKESISQDIDHIL  
ETLSALAVDLGGTNLRIGIVSMTGEI IKKYVQPNPKTYEDRIELILKMCVEAASEAVKLNCRILGVGIS  
TGGRVNPREGVVLHSTKLIQEWSSVDLRTPLSDTLHLPVWVDNDGNCAALAEKFGQGGKIEDFVT  
VITGTGIGGGVIHNHELHVHGSSFCAGELGHIMVSFDGPD CMCGSRGCVEAYASGIALQREAKKLHDE  
DMLLVEGMSVKNDESVS AVHLIQA AKFGNTKASNILKTAGTALGIGVINILHTINPSLVILSGVLANQ  
YVNVVKDVIRQRGLASIQNV DVVVSSLS DPALLGAASMVL DYTTTRTY

>Gallus gi|71895297|ref|NP\_001026603.1| bifunctional UDP-N-acetylglucosamine 2-epimerase/N-  
acetylmannosamine kinase [Gallus gallus]

MEKNGNNRKLRVCVATCNRADYSK LAPIMFGIKAEPQFFELDVVVLGSHLIDDYGNTYRMIEQDDF  
DIHTRLHTIVRGEDEAAMVESVGLALVKLPDVLNRLKPDIMIVHGDRFDALALATS AALMNIRILHIE  
GGEVSGTIDDSIRHAITKLAHYHVCCTRSAEQHLIAMCEDHDRILLVGCPSYDKLLSAKNKDYMSVI  
RMWLGEDVKPRDYIVALQHPVTTDIKHSIKMFELTDALISFNKRTLVLFPNVDAGSKEMVRVMRKK  
KGIEHHPNFRAVKHVPFDQFIQLVAHAGCMIGNSSCGVREVGAFGTPVINLGTRQTGRETGENVLHV  
RDADTQDKILHALQLQFGKQYPCSKIYGDGNVPRILKFLKSIDLKEPLQKKFCFPVKDNISQDIDHI  
LETQSALAVDLGGTNLRVAIVSMKGEIVKKYTQLNPKTYEDRLGLILKMCVEAASEAVNLNCRILGV  
GISTGGRVNPREGIVLHSTKLIQEWSSVDLRTPI SDALHLPVWVDNDGNCAALAEKFGHGKGIENF  
VTLITGTGIGGGIIHQHELHIGSSFCAAELGHIVVSLDGPECPCGSQGCIEAYASGIALQREAKKLHDE  
DLLLVEGMSMKNEEVVSA AHLIQA AKLGNKAESILRTAGTALGLGVVNILHTMNPSLVILSGVLAS  
HYVNAVKDVHRQALSSVKTVDVVVSNLADPALLGAASVL DYTTTRRIY

>Homo gi|45360235|gb|AAS59258.1| UDP-N-acetylglucosamine-2-epimerase / N-acetylmannosamine  
kinase [Homo sapiens]

MEKNGNNRKLRVCVATCNRADYSK LAPIMFGIKTEPEFFELDVVVLGSHLIDDYGNTYRMIEQDDF  
DINTRLHTIVRGEDEAAMVESVGLALVKLPDVLNRLKPDIMIVHGDRFDALALATS AALMNIRILHIE  
GGEVSGTIDDSIRHAITKLAHYHVCCTRSAEQHLISM CEDHDRILLAGCP SYDKLLSAKNKDYMSIIL  
MWLGDDVSKDYIVALQHPVTTDIKHSIKMFELTDALISFNKRTLVLFPNIDAGSKEMVRVMRKKG  
IEHHPNFRAVKHVPFDQFIQLVAHAGCMIGNSSCGVREVGAFGTPVINLGTRQIGRETGENVLHVRD  
ADTQDKILQALHLQFGKQYPCSKIYGDGNVPRILKFLKSIDLQEPLQKKFCFPVKENISQDIDHILE  
TSLAVDLGGTNLRVAIVSMKGEIVKKYTQFNPKTYEERINLILQMCVEAAAEAVKLNCRILGVGIS  
TGGRVNPREGIVLHSTKLIQEWNSVDLRTPLSDTLHLPVWVDNDGNCAALAEKFGQKGL ENFVT  
LITGTGIGGGIIHQHELHIGSSFCAAELGHLVVSLDGPD CSCGSHGCIEAYASGMALQREAKKLHDED  
LLLVEGMSVPKDEAVGALHLIQA AKLGNKAQSILRTAGTALGLGVVNILHTMNPSLVILSGVLASH  
YIHIVKDVIRQQALSSVQD VDVVVSDLVDPALLGAASMVL DYTTTRRIY

>Mus gi|4456673|emb|CAB36908.1| UDP-N-acetylglucosamine 2-epimerase/N-acylmannosamine kinase  
[Mus musculus]

MEKNGNRRKLRVCVATCNRADYSKLA PIMFGIKTEPAFFELD VVVLGSHLIDDYGNTYRMIEQDDF  
DINTRLHTIVRGEDEAAMVESVGLALVKLPDVLNRLKPDIMIVHGDRFDALALATSAALMNIRILHIE  
GGEVSGTIDDSIRHAITKLAHYHVCCTRSAEQHLISM CEDHDRILLAGCPSYDKLLSAKNKDYMSIIR  
MWLGDDVKCKDYIVALQHPVTTDIKHSIKMFELTLDALISFNKRTLVLFPNIDAGSKEMVRVMRKK  
GIEHHPNFRVAVKHVPFDQFIQLVAHAGCMIGNSSCGVREVGAFGTPVINLGT RQIGRETGENVLHVR  
DADTQDKILQALHLQFGKQYPCSKIYGDGNAVPRILKFLKSIDLQEPLQKKFCFPPVKENISQDIDHIL  
ETLSALAVDLGGTNLRVAIVSMKGEIVKKYTQFNPKTYEERISLILQMCVEAAA EAVKLNCRILGVGI  
STGGRVNPQEGVVLHSTKLIQEWNSVDLRTPLSDLHLPVWVDNDGNCAAMAERKFGQKGQENF  
VTLITGTGIGGGIIHQHELIHGSSFCAADVGHVSLDGPDCSCGSHGCIEAYASGMALQREAKKLHD  
EDLLLVEGMSVPKDEAVVALHLIQA AKLGNVKAQSILRTAGTALGLGVVNILHTMNP SLVILSGVLA  
SHYIHIVKDVIRQQALSSVQD VDVVSDLVDPALLGAAS MVLDYTTTRRH

>Paracentrotus1 GLEAN3\_05241

MYSLMVDALMEFNKRVMILFPNIDAGSKDIVRIMRQKGVETNPMFY PVKHIPFEFII LVANAGCMI  
GNSSAGVREAGAFGTPV VNLGSRQTGRETGENVLHCRDADTTQKIHHALEIQYQRQFPSSYIYGDG  
HAVPRIIKFLKSIKQEDTIQKQFIFPPMPESPSIDIDHILETQSALAVDMGGTQLRVALIAADGEIKLRRS  
RPTPHTNNEERMKALLELLEATKESYALNCRVLGVGISTGGRVNSKEGLVMHSTKAIAGWDEIDLR  
TPIETTLHLPVWVDNDGNCAALGERKFGHGRGVKDFIT IATGTGIGGGIVLDKRLIHGTNFC AAEELG  
HIKVS LDGPACQCGSHGCVEAYSSGMALKREAMKLHEAGELLVDGMIVEKGE EVTAKHLVQA AKT  
GNQKAKKILDTGAQALGTAITSLLHVLNPKLVILCGV LSSVYLEPVREAVKAHSLPSAVSEVEIVSSQ  
LVEPALLGAASLVLEYATRRTY

>EU\_Cow [cowbropro] CAOG\_03577T0 | CAOG\_03577 | Capsaspora owczarzaki ATCC 30864 UDP-N-acetylgluc

MPSFRLPPFVRKPTVLALVFMLELVVALALLSSSTGLNGWKLGNPAPDNVDVQLSEQQPGASGDAV  
SPLPAALAAQLHQLAQHRQNQARRRPLALVFGTRPEVIKMAPLVHEMQENSVNSHVFDTIVVSTG  
QHREMLAQT LRGF DLKIDGLSVMQHNQNLGALFAAVVAQSTAVIASLRPEVVLVQGD TSTALACA  
TAAYYERVPVAHVEAGLRSFDFNHPFPEEMNRAIDS FATFHFAPTEYAAEAIRRENTCARNIVVTGN  
TGVDAVLARLNADPPAAARRLIAQLQTCTGGACDVNDAPPV IILVTSHRREN LGEPLE SICRAVKRIV  
EDNPVVRVVPVHLNPNVQKVFAHLKNVD RITLTDPLDYDVLTYLLQEVTIVLSDSGGLQEEAVSI  
GKPVVLLRQTTERPEGVYAGTVRLAGTNEDRVVSDTQNVIDNLVEYHQRIKGNVFGDGAASGRIA  
NVL RQYLAADSAQRRKYLAPCTQEKQAE LANV VYGHS

>EU\_Cow\_2 [cowbropro] CAOG\_05274T0 | CAOG\_05274 | Capsaspora owczarzaki ATCC 30864 UDP-N-acetylgluc

MQANVLTPADSSSTPLSASPVPSSGASLVGVAARIAVRPTATRVLSIFGTRPEVIK FYPVLKEMDRRS  
ESLLSITCVTGQHRQMIDPLLSLFDIATDIDLNLMTQGQTL SNLSARLFTALAPVFEAVRPHLVLVQGD  
TTTAMIAAMCAFYYRVPVGHIEAGLRTNDRYNPFPEEVNRRIVSVVGNLHFAPTNYAAEALRAERID  
MQTVFVTGNPVIDAILLIREKAPSA AARQLLDRVEAVDAATNATLPAGQKARHILLTAHRRENHGEGI  
AAICRAVKRIIAQH KD VNVWYPVHLNPAVCVPVRQELGKVERVHLLDPLEYDVFVHFLDRMYMVM  
TDSGGIQEEVTALAKPTIVLRETTERPEGVDAGVTKLVGIHEDTIVKEANVLLTDEQTFAKMSCKCFP  
FGDGTA AKQIVDIMLSVSEVKLSIGA

>EU\_Cow\_3 [cowbropro] CAOG\_03163T0 | CAOG\_03163 | Capsaspora owczarzaki ATCC 30864 UDP-N-acetylgluc

MSKQLLNIMNSSLLTPVPSIPTPLSPSPAAMLACGASYPNVAARIAERPTATRVLSIFGTRPEVIK FY  
PVLKEMDKRSESILSITCVTGQHRQMIDPLLSLFDIATDVDLNLMTQGQTL SNLSARLFLALAPVFEA  
VRPHLVLVQGD TTTAMIAAMCAFYYRVPVGHIEAGLRTNDRYNPFPEEVNRRIVSVVGNLHFAPSSY  
AADALRAERIDMNTV FVTGNPVIDAIMLIREKVPSAAARQLLDRVEAADAATNAVLPAGQKARHILL  
TAHRRENHGEGIAAICRAVKRIIAQH KD VHIWYPVHLNPAVCVPVRQELGKM ERVHLLDPLEYDVF  
VHFLDRMYMVM TDSGGIQEEVTALAKPTIVLRETTERPEGVDAGVTKLVGINDDTIVKEATLLLTDD  
QTFAAMSRKCFPF GDGTAAQQIVDILLTSLSTNKLSIGA

>EU\_Enterocytozoon tr|B7XKK1|B7XKK1\_ENTBH UDP-2-acetamido-2,6-dideoxy-beta-L-talose 2-epimerase (Fragment) OS=Enterocytozoon bienewsi (strain H348) GN=EBI\_23619 PE=4 SV=1

MKKLKVVTVVGTRPEIIRLSRVMAELDKHCDHILVHTGQNYDYELNEIFFRDLGIRTPDYFLNAAGV  
SGAQTIGNVIIAVDRVLEDVKPEALLVLGDTNSCMAVIPAKRRRIPTFHMEAGNRCFDMRVPEEINRR  
IVDHTADINLTYSIARDYLLREGLPPDMVIKTGSPMF EVLNYYR DGIEASDVLKRLGWRR

>EU\_Micromonas tr|C1EJ11|C1EJ11\_9CHLO Udp-n-acetylglucosamine 2-epimerase/CMP-N-acetylneuraminic acid synthetase OS=Micromonas sp. RCC299 GN=MICPUN\_64942 PE=4 SV=1



MPACPNTADKASLYAPDKCTDMKTTLRRKICVVTSNRSDWSKLLKLVAINLRKLCTSQDNQEASDIQ  
VDIICLGSHELLHELGATKNIVKEDFPNAYELHTLVAGDSVESMTDSVGFVGLKLTSLLCALKPNIVLVH  
GDRFDFACAAIAANMLNLTIAHVEGGELSGTVDGTLRHAIKLSHLHFTCTPEAARRIRGMGENPAS  
IFVTGCPSYESLFAVSATCWEDEKMDQFFNGTPFKLKPNKFFILVIMHPVTNDLEESNTLYGSLLSCLFS  
RKTPTVMFYPNVDPGNKSMIQTLLHKHQKADPASTSWLRLVTHMPHAKFTALMRHASAMVGNSSA  
GIRESVFGIPTLNLGSRQEGRRVPANVTTLVKPSIRSIDCWFDNELGKRYAQSTMYGFPSAKRIAH  
HLSRIDTSAGQLKQFWEPRYALLPPLQPRQYVSRTOAILADSTSSPTSSPIGRCKILGLITARGGSKGIP  
GKNIIDLNGKPLIQYTIEAALSSKQLDRVILSTDSDEIAEVAQNCGCEVPFRRPSELAADDSSHLACIV  
HALNILRETECFVPDFVILQPTSPFRKSIDIDSCINIMLTSSCDMVLSVCESSLNLKSNFYFAADGTL  
PFAESTAIDYTPRQKLLKTYAENGAVYVLRTOQLLYPPDNAPNVGSFRSADTKGYEMPVERSLDIDN  
PFDLHVARLLMAKPF

>EU\_Naegleria gi|290995697|ref|XP\_002680419.1| predicted protein [Naegleria gruberi]  
MSKIFKLIIACTTLLVFSFVFFRLLTKSPINSNIFDRNSNTKQETPTIPHKNLPRVVIVLGTREPAIK  
CAPLISHLKSNYSSSELELIVLSTGQHSEILKQTLAVFDQHVVDIDLELMEPNQSISSFFTLAYQRISLEFER  
QGPIISIVLVQGDTTTTSLAALAASYLKIPVGHVEAGLRSYDFNSPFPEELNCKMIDSFARLLFAPTFD  
KAALVREGICPQHVVHTGNTGIDSFYSLMSVPPKIIPEFLKNIKSFKGSNDHAAETLAIESHHRIVILVT  
MHRRENIPHFKEMCNAIKTISNTFGKNVMILPVHPNPNAKSVVNEVLSALDNVQLVDPIAYDIFPHV  
ISEADIIVTDSGGIQEESASIGKPVILMRDTERPEGIYIGTIKKIGVNYFHIVKAMTDAIKDSQNSKQIL  
SKHIFGDGKASMRISKIVRDFVTSKLPDSIECSTQFIQDSIAESVYSQNFTRK

>EU\_Naegleria\_2 gi|290982189|ref|XP\_002673813.1| predicted protein [Naegleria gruberi]  
MPRVVIVLGTREPAIKCAPLISHLKSNNHSELEVIVLSTGQHSEILKQTLGVFHQHVVDIDLKLMTPNQ  
SISSFFTLAFQKISLEFEKQGPISMVLVQGDTTTTSLVAALAASYLKIPVGHVEAGLRSYDFNSPFPEELN  
RKVIDSFASLLFAPTEFSKAALVREGICPQHVVHTGNTGIDSFYSLKSLPPKIIPELLQNIRSFKTKHVD  
ATTSSHRTVILVTMHRRENIPHFKEMCNAIKTISNTFGKNVMVILPVHPNPNAKSVVHEVLSLSDNVQ  
LVDPIAYDIFPHVISEADIVVTDSGGIQEESASIGKPVILMRDTERPEGIYIGTIKKIGVNYHHIVKAM  
TDAIKDSQNSKLILSKHIFGDGKASMRISKIVRDFVTSKLPESSECSTQFIQDSIAESVYSQNFLPFESR  
KKELLERSKPKDPLTMQELFALPSAYTPATKTSDEFVTVVVGLYKRTGLVKRWMQALLSQTHQPK  
VVWVMVFFASPKAEIENEIQEAKLLATSNNISLFINKGEMQLKYFGRFQLALQSPTKYIAVFDDDCIP  
EKRFLEAAIHTINTNRYRGILGTGTPAEDYFYGPVSGSEQIIEVDVVGGSWFMEREWVKKLFREK  
MFSWATGEDWHLCSNARKYANIRCFVMPVSRLETNSYSGDYMQISNNGDTTGRVQGTSEARSLIIQ  
KETQRGNRLMNSYRNNDLRTAFVFLSNQNEGRILKMLSSLELPFTIQYSLGVADQSQIAQIDSELSKI  
TKFKSFNDFMLSREFDTAQTNLSSAAETMYHFDMSIQQQQATAVILVGSSTPSTLAVATACQINKIPV  
INFVLTEKSNKLVESVSVLTVRSTPIDGNLLDETTRILTETLIKIFT

>EU\_Naegleria\_3 gi|290992983|ref|XP\_002679113.1| predicted protein [Naegleria gruberi]  
MSKIFKLSVVCCTLLVFSFVFFHILNINKSSADSDNMLVRNSNGKREGIIPHKNNLPRVLIVLGTREPA  
IKCAPLISHLKSNYSSSELEVIVLSTGQHSEILKQTLGVFHQHVVDIDLKLMTPNQSISSFFTLFQKISLEF  
ERQGPISMVLVQGDTTTTSLVAALAASYLKIPVGHVEAGLRSYDFNSPFPEELNRKMIDSFASLLFAP  
DFSKAALVREGICPQHVVHTGNTGIDSFYSLKSTTPKIIPELLQNIKSFKSNVLDTTSSSTTSSAVESH  
RIVILVTMHRRENIPHFKEMCNAIKRISNTFGKNVMVILPVHPNPNAKSVVNEVLSLSDNVQLVDPIA  
YDIFPHVISEADIVVTDSGGIQEESASIGKPVILMRDTERPEGIYIGTIKKIGVNYLDIVKAMTDAIKD  
SQNSKQVLSKHIFGDGQASMRISRIVRDFITSKLPDSRECSTQFIQDSIAESVYTQNFLPFEIRKKDLLE  
RSKPKEQLTMQELFSLPSTYVPTRNSTSEFGVTAVVGLYKRTGLVKRWMQALLSQTHQPKVIWVMV  
FASPKADEIEKEIQEAKLLASSNNISLNVNKGEMQLKYFGRFQLAIQSPTRYLAVFDDDCIPERRFFEA  
AMHTINTNRYRGILGTGTPSAEDYFFGPVSGSEHIEVDVVGGSWFMEREWVKKLMFREKMFSWAT  
GEDWHLCSNARKYANIRCFVMPVSPLETNSYSGDYMNISNNGDTTGRVQGTSEGRSLIIQKETQRG  
NRLMYSYRGNDQRTAFVFLSNQEEGKTILTMLSSLELPFAIQYSLGVADQSQIAQINLDELSKITKISF  
NDFMLSREFDTAQANLSSVAETIYHFDMSIQQQQATAVILVGSSTPSTLAIATACQINKIPLINFLLEN  
SNKLIESVSLTIVHIPIEGSNGNLLDETQRSLTETLIKIFN

>EU\_Ostreococcus tr|A4SAA4|A4SAA4\_OSTLU Predicted protein OS=Ostreococcus lucimarinus (strain  
CCE9901) GN=OSTLU\_25793 PE=4 SV=1

MKDIESERFDR TAYS AEIKIAIVFGTRPEAVKMAPVIQAVARSSTLSAILISTGQHKQMLEQVLRQFSL  
QDKIQHELALMKPNQQLAELTSSAVRAVDGVLRSSKPDALVQGDTTTAFITSLAAFYLPVGHIEA  
GLRTRDIYSPFP EEVNRQCISVMATYHFAPTEHA AKNLYDEGRRTNVFTTGNTVTEPSDRVIELSKVV  
KTVSTLRDVRL LLLTAHRREN LGEPILNIFTSIEKLLQEYDPVVVIYPIHLNPMSDHAPPTTTHLRLLI  
VPPLDHADLLFMMKESFFVMTDSGGIQEEAVTLGKPVLVLRD TTERPEGVLAGAAKLVGHGAESYI  
TEAASLLKDPDSYRSMMSGSKKTYGDGNAAGNIVAKEKQKERRGTVPKK

>EU\_Ostreococcus\_2\_jgi|Ost9901\_3|25765|estExt\_fgenesh1\_pg.C\_Ch\_180008

MGRLKSILVLD RRRARTLISLVSLVSLCFAALLSVNKHAGWPRKGD PPTPSLDSMKDIESERFDR  
TAYS AEIKIAIVFGTRPEAVKMAPVIQAVARSSTLSAILISTGQHKQMLEQVLRQFSLQDKIQHELALM  
KPNQQLAELTSSAVRAVDGVLRSSKPDALVQGDTTTAFITSLAAFYLPVGHIEA GLRTRDIYSPFP  
EEVNRQCISVMATYHFAPTEHA AKNLYDEGRRTNVFTTGNTVVDALYAILKTEPSDRVIELSKVVKT  
VSTLRDVRL LLLTAHRREN LGEPILNIFTSIEKLLQEYDPVVVIYPIHLNPMSDHAPPTTTHLRLLI  
PLDHADLLFMMKESFFVMTDSGGIQEEAVTLGKPVLVLRD TTERPEGVLAGAAKLVGHGAESYI  
TEAASLLKDPDSYRSMMSGSKKTYGDGNAAGNIVRILETMPRFARPLLYFTMRKTFG

>EU\_Paulinella tr|B1X5F8|B1X5F8\_PAUCH UDP-N-acetylglucosamine 2-epimerase OS=Paulinella  
chromatophora GN=PCC\_0762 PE=4 SV=1

MTTPPLVSVILGTRPEAIKLAPVIMSFQKCGALRTRTILTGQHREMVNQVMKLFQLSFDKDLALMEP  
NQTLHLTATILEGLRKEFLVHRPSLVLVQGDTTTALASAMA AFYEQIPVGHIEA GLRTRNDIDDPFPEE  
GNRCLISQITKLHFSP TIQSAANLQASGVIGEI HITGNTVIDALLSMSQKKSTVCQINGLNWKDKRVIL  
ATVHRRENWGT RLNGIAYGFFKLLERHSDVALLPLHKNPAVRKPLNDILKDHPRAFLTEPLAYDQL  
VAAMRSCSLVLTDSGGIQEEAATFGKPV LILRRTTERSEAVEGGTARLIGTDTTDILNEASLLLKDDSA  
YRAMSQFNPF GDGKASDRILTAARTFLNC

>EU\_Physcomitrella tr|A9U8C8|A9U8C8\_PHYPA Predicted protein (Fragment) OS=Physcomitrella patens  
subsp. patens GN=PHYPADRAFT\_104339 PE=4 SV=1

MDILVVP SMVSEFGMTALEGMLCGKPVVAFASGGLGELMVSTGNGHLAVPAGDVQGLADKVAGL  
LDDPAALANTGFHNEATARAMYGIETYQRR LDEIMNQWRTLYPHWLMPGNRAPLILAEPEVSAQ PPI  
EPPDEPAPAPRKARRSRGRTSFRIRIIRKRRVKKA AKRSRKRKPGKAVRKLKLMKPEIIRLSLILPKLDR  
YAERHVLVHTGQNF AERLSGIFFSQLGLRKP DYVLQDSAASLGTQLSAMFSQMEDILEREKPD TILL  
GDTNSALCAILAERLGYPVVHMEAGNRCFDLN

>EU\_Ricinus tr|B9TNA0|B9TNA0\_RICCO Polysialic acid biosynthesis protein P7, putative (Fragment)  
OS=Ricinus communis GN=RCOM\_2068830 PE=4 SV=1

MPDGGRT EGERMSMIRKICVFTGTRAEYGLLRPLMQAIATRP GATLQTLVTGAHLAESTGATWREIA  
NDGLPIDERVEVLLDGGGDESICTSIGLGMRYAEALKRLAPDMLVILGDRYEAI AAVAATVCKVPI  
AHIHG GELTLGAMDDAFRHSITKMSYLHFTSTEAYRKRVIQLGEQPARAHNVGALGVENIRTLNLYD  
RAEVEKRLDLPAGQPYLLVTFHPATLESQSP ELQLKALLNALDAFPD HVCVFTGANADPGGAGLNR  
LLADH

>EU\_Ricinus\_2 tr|B9TD82|B9TD82\_RICCO UDP-n-acetylglucosamine-2-epimerase, putative (Fragment)  
OS=Ricinus communis GN=RCOM\_1782450 PE=4 SV=1

MEAGNRCFDQRVPEELNRKVLDHLS DINMVLTEHARRYLLAEGIPADRIIKTGSHMQEVLEY YMPNI  
EASNVLERLNLSSQYFLLSTHREENV DSPANLQDLLDTLQALVKKYDMPVVVSTHPRTRQRLEKL  
GVGSLDNRIHFLKPF GFFDYIKLQKEAFCILSDSGTITEEASLLNLSAVTIRNAHERPEGMDEGTLIMC  
GLKTERVLD AVNIVTHQHKKTDKLNIVPDYLGGLVSRK

>EU\_Salpingoeca [pspscogens] scf7180000054676|GENSCAN\_predicted\_peptide\_30|366\_aa

MGNFTIVAGARPNFMKIAPIIHEIQKLQKEKSGVSFRLIHTGQH YDKKMSGDFFEQLDIPQPHANLGA  
GGGTQAEQTAAIMVAF EKELMENRPDLVLVVDVSTLSCSIAAKKLQIDVAHVEGGIRSGDLGMPE  
EINRMVTD SITDHFFTTSEIANQNLNRNSGFSEDKIHFVGN TMIDTLAQMPKFQKPEG AIFDQLEAGN  
YFVMTMHRPANVDQEHK LKAMIDA ILDGTKGLPIIFPVHPRTAKNLQAIGIEAPNLNMNPLGYLEFN  
YLVKNAKGVITDSGGITEEASVMNVPCITLRD NTERPETIDLTG TNELVGTNPEKLPYLDKIMSGDW  
KKYKGIPLWDGKTAERIVKILEDKYPSVK

>EU\_Spyzello [spunprot] SPPG\_08155T0 | SPPG\_08155 | Spizellomyces punctatus DAOM BR117 UDP-N-  
acetylglu

MGTRPETIKMFPIRALNTHGINPIICVTGQHQEMVEPLLRLFDIKPHVNLNVMKSGQSLNSLTERIVG  
RMTKAVTHYRPDWLLVQGDTSFAFVASVVAFHEKIAVGHVEAGLRTYKRYSPFPEETSRRLIAGLAS  
YHFVPTQHAANLKAEGIPSENVYITGNTVIDALQWVASLEPSPEVASSLLEIEEAAKSHTSQYRLLL  
VTMHRRENLSPLISVCKAIKRIVDGFDPVHIVLPVHMNPTVQETVTQFLGNDKRITLLGPLSYEFFA  
QLLKRATLLLTDSGGVQEEGTAFSKPILVLRNDTERPEGVTAGVAKLIGTDEDNVFRHVQELLTDKQ  
AYAAMAIAKTFPYGDGTAGSKIVDIVLKGSAQIAVNRPTIASDKLVEAESAKTTLTNVSESTSAASIAPR  
PRSFVRAPTKPRQLNLTALLELPSSYPENGDGKGLNGITAVISGYNRVEVIPRLLGSLFNQTVPPLEIWI  
TVFASKSVAAIKQAVDDFANSHKAQKIPIKFLQGDVQLKYFGRFEVGLQIPTKYAVFFDDDCLPGAN  
VFRNFLHVQNIIVGGEFRGLYGAKGHIVPVQNSNNYKETYGLGQVIHPEVITQVDLVGGIWFMEKDW  
IKLMFRENAV TWETGEDFQITYTLSKYANLPTFVFPVAASDPSSHLVTPDYRAISASGDTTHGAISVN  
GKEMDIHRLRDYITFKHFTRGHTRVLMSEMWRPNEMRILYLVDTIQDARLFKPLHEYI WATT LQKPV  
PNIRLRPFPVLIGRYPQSQLSELGISWTLESFHTGVFDLGVASEFSRKSRAVDIATEVMMSFQQVIET  
VRPDLVIVPNSPDDPAIVAAAITARSFNGFNVAWNKNAKDVLLPDESNSNERLTPLKDLVDGHIET  
NEMVARILEEIAVASWLARRRDVVRTDFRN

## ROK sequences

>A\_CRENARC\_2 tr|A1RT73|A1RT73\_PYRIL Glucokinase OS=Pyrobaculum islandicum (strain DSM 4184 / JCM 9189) GN=Pisl\_0979 PE=4 SV=1

MGKFFYSALKQVYVRLFLGIDIGATWTRALLIDEHGDIIINRVKVKTSVNPIADVVDIVKRWQFHAVG  
VGSIGPLDLKSGWVNSPNSPTRRFPLEPLKELGKPIVVANDCVAAVWGEYVFKYNVENMVYITLS  
TGVGVGAIVNGNLLL GKDGNAHELGHVIDFKSARRCGCGGRGHFEAYVGGAHIPRVYQEATGDA  
PASPEEIFRRYRHGDEKARKFINLWLDALAAGIATVVAAYDPELLIVGGSIALNNWDIISRELPARLRD  
YLSLREPEILKASFGDDEVAVGAAALAYKTPDTLKKFGYPITASSQS

>A\_EURY\_2 tr|Q2FS47|Q2FS47\_METHJ ROK OS=Methanospirillum hungatei (strain JF-1 / DSM 864) GN=Mhun\_2804 PE=4 SV=1

MQHGEGRAGAADIGGTNTRVGLIREDGKIVRIEKFPPTVSGNAEDIPLAIARALMDIAGDIPLAGLGI  
AAAGPLNIREGILDHPPNIPDFVPIVAPLKEATNLPVIFQNDCAAVALGVCAGGARGYETVVYITIS  
TGIGGGICTNGKVITGRGGNAGEIGHFPVDTTYNLTCTCGLSGHWEGYASGRGIPFFREWCTAHDL  
PCIYSTTPEILRFSATDPYAGFRDALAQVNGRGLSSVIVAYDPDCHILDGTVIQRNPDLDDQALVYTD  
RYLDLPPCIFSPNGDAPLIGAAMAVFHPKMI

>A\_THAUMARCHAEOTA tr|A9A5Z4|A9A5Z4\_NITMS ROK family protein OS=Nitrosopumilus maritimus (strain SCM1) GN=Nmar\_1576 PE=4 SV=1

MLYKLGVDLGGTKTEAILLDDSLNVLERKRVPTPKNNYSEILDITISNLVLELSSNTLDYSLGICTPGAI  
SKKTGLIKNSNTQCLIGKSLKEDLEKLLKKTIVMENDANCFVMAESKMGAAKNFDLVFGVIMGTG  
VGGGITVNGKLHSGRTNIAGEWGHHTLHRNGNPCYCGKTGCVETYISGPALQKQWELLSGESKSV  
EILSNLNDIGKTWKSEFLENFGYSLANVIDILDPDAIVLGGGLSNIDFLYTEGKKSVEYKVFSDLVD  
TPILKNELGDSAGVYGAALLN

>B2\_Actino gi|221195876|ref|ZP\_03568929.1| fructokinase [Atopobium rimae ATCC 49626]

MVDGPRIGALEAGGTKMVLAIGTREGKIFEREVMPPTTEPAGIVSKMIAWFAEREIDALGVGAFGPTC  
VNPELPDYGKILSTPKQGWVNYDFL GALRAGLGVPIGYD TDVNAACLGEALFGSARGLKNVYLT  
VGTGIGAGVLLGGKLLHGMLHPEAGHIPIEREKDDPLAMSVQCQYHVSCLEGLASGPSIEKRWGLPAS  
ELDEKQEVWELEATYLAKALAVYVLCYSPQRILGGGVMMKQTQLFPLIRQKLENLNGYINTAELSA  
IDSYVVS DGC SG NQGILGALALGLQSLDS

>B2\_ALPHA gi|302382790|ref|YP\_003818613.1| ROK family protein [Brevundimonas subvibrioides ATCC 15264]

MSVFAGVELGGTKVMVGFSGPDDLSDPIRIPTTTTPDQTLAEVERLIAGVAAHTTLQGIGVATFGPAR  
LDRAAPDWGRILPTPKPGWTGAVIAPRLAEAFGVPAFDTDVAGAAMGEGHWGAAQGLRDHAYV  
TVGTGVGVGLIVNGMPLHICALHPEAGHIKVRDPARDPFEGVPCPFHGDCEGLVSGPALAKRTGQR  
GETLTADDPVWDLVADYLAQAMATLCFVAAPRIVIGGGVGSHTPTVLAATRLRLRDELGGYLP  
HLA SAGAIETFLVPPALGDRSGVLGAIALARALHDTSQTTKAPDGPASQGTLEEDPHDRRQPDG

>B2\_Bacteriodes gi|268315688|ref|YP\_003289407.1| ROK family protein [Rhodothermus marinus DSM 4252]  
MAERPLLGLEAGGTFVCAVGTGPDDIRALERFPTTTPEETLGRVIDFFRRQPEPIAALGIGSFGPVD  
PDPGSPTYGYITTTTPKPGWAHTDVAGTLRRALNPVAFDFTDVNAAALGEQRWGAGRGLHTFVYLT  
GTGIGGGVIVNGRRRHGRQHPEIGHLFIPLRPGDDRPGHCFHGDCEGLASGPAIAARWGRPAPPEL  
PNHPAWDEVAQYLAFLANLILTLSPQRLILGGGVMHQTHLFPRIIRRHVAACINGYVALPDLDTFIVP  
PALGDRAGVLGALALAEVMSGLKHGIL

>B2\_CHLORO gi|163846165|ref|YP\_001634209.1| ROK family protein [Chloroflexus aurantiacus J-10-fl]  
MTHAPLYGGIEAGGTKWVCAIGTGPDDIRAEVRFPTTTTPAETLANAIAFFRAHEPEHLAAIGVGSFGP  
VDLNPASPSYGSITTTTPKPGWAHTDVVRTLHQALGRPIGFDFTDVNVALGERQWGAARDCDVAVYI  
TVGTGIGGGAVVGGKLVHGLIHPMGHMLVRDPARDPFPGICPYHSDCLEGLACGPALKARWQTP  
AEELPADHPAWELEADYLGQALANLLCILSPERIIGGGVMSQPQMFPLVRAATQRWLNGLYQHPHI  
LDHPDRLIVPPALGQRAGVLGAIALAMHTAGGV

>B2\_FIRMI gi|160879723|ref|YP\_001558691.1| ROK family protein [Clostridium phytofermentans ISDg]  
MKIGALEAGGTMVCAIGDENGNIIERISIPTETPEITMPKIIIEFFKAAKVEAIGVGCFGPVDLNRASA  
QYGYITSTPKLSWRNFDILGNLRELNVPIGFDFTDVNASALGEATYGITKGLDVSIIYITIGTVGVGV  
FINGQLLHGMLHPEAGHILLERHKEDTFGGSCPYHQNCFEGLASGPAIGKRYGKSANELSDCDEVW  
KLEAYYIAQALYNYTCMFSFNKIVLGGGVMHQKQLYPLIREEFKKIMNGYIDTKEVRDLENFIIAPSL  
NDNQGILGCLELANREMRLLL

>B2\_FIRMI\_2 gi|310640969|ref|YP\_003945727.1| rok family protein [Paenibacillus polymyxa SC2]  
MKRDHGEGITAMTVLGAIEAGGTFVCGIGNERGEVLERASFPTTTTPAETMENVIAFFEGKGI  
GVGSFGPIDPIEGSDTYGYITTTTPKPHWGNYNLIGKLKEHFDVPMGFDTDVNGAALGESIWGA  
LDNCLYITIGTGIGAGALVGGKLVHGLSHPMGHILVRRHPEDNYEGTCPYHGDCEGLAAGPALEK  
RWKVKGHELSVDHPAWEMEAHYLAQALMSYILILSPQKIIMGGGVMKQDQLFPLIRTKLQQLNGY  
VQHSSLTTEIEQYIVSPGLGDNAGLCGALALAKEKLS

>B2\_FUSOBAC gi|257125414|ref|YP\_003163528.1| ROK family protein [Leptotrichia buccalis DSM 1135]  
MAIIAAVEAGGTFKICGLGTEDGKIIERSIPTTTPEETMAQVIEYFKDKEFDVMGVGSFGPIDPVKGS  
KTYGYITKTPKPYWSDYNLIGELKKHYDVPMEFDFTDVNGAALAESWWGAGENLKNVMIYITVGTG  
IGAGAVVDGKMLQGLTHPEMGHIFLKRHKDDKFEGRCPFHKDCMEGMAAGPAIEDRWGKKGFELA  
DRNEVWDMEAYYLAQAVVNYTLILSPQRIIMGGGVMKQKQLFPLIRKYVLEFLNGYVQKEEILEKIE  
DYIVYPGLGDEAGFVGSIALGKIALENNRK

>B2\_FUSOBACT gi|269118873|ref|YP\_003307050.1| ROK family protein [Sebaldeella termitidis ATCC 33386]  
MKKIAAIEAGGTFKICGIGNENGEILDKTSIPTKTPEETMKMVIDYFKDKEFEAMGIGCFPIDPVKGS  
ESYGYITKTPKPHWSDYDIVGELKKHFDVPMFEFDFTDVNSAALGESLWGAGQGLSSVVYITVGTGIG  
AGAVINGKMLQGLTHPEMGHIFVKRDKNDPYTGKCPFHKDCLEGLAAGPAIEERWGDKAYNLEER  
NEVWEMEAYYLSQALVNYILILSPQKIIMGGGVMKQSHLFPLIRKMOVRETLNGYVHKKEILEDIDNY  
IVYPGLKENAGLMGSLALGRLAENR

>B2\_GAMMA gi|90022284|ref|YP\_528111.1| fructokinase [Saccharophagus degradans 2-40]  
MKNLFGAIEAGGTFVCAVGSPPDLTEVRFPTTTTPQETLGKALAFFAPYKQQLKSIGIGSFGPVDLQ  
RNSPTYGFVTSTPKPGWADTEFAGVFARLFDLPVGFDTDVNGAALGEQRWGAAQGLDNFIYITMGT  
GIGGGVVAGGKLIHGLVHPELGHMFVPKQPDDTFAGQCPYHGDKCFEGVAAGPAIGARWGTPAHEL  
PADHPAWDLQARYVATALASLVCSFSPQRIILGGGVMGQAHMLNSVREKTVQVLNGYIQSPAILENI  
NEYLVLPGLGDKAGILGAMVLAEQAFDNR

>B2\_GAMMA\_2 gi|254787264|ref|YP\_003074693.1| fructokinase [Teredinibacter turnerae T7901]  
MNEPLYAGIELGGTKTICLIGTGVDSDIRDQLQIPTTNPADTLGQIHTFLASQGELAGIGIGAFGPVNIDP  
GSANYGCIESTPKPGWSHTSVVPPFRFRFSPINLDTDVNAAIAEHQHNGKGLRNFIYITVGTGIG  
GGALIEGAPVRGNSHPMGHIALPRHMADETFLSACPYHQNCAEGLASGSALRKRWGMPLNEFPPE  
HPAWDMQASYLAEFFHSLTLLFSPQRIIVGGVSSSEQLLARVRTALYKKNLNGYVDALKLEASLESYL  
CLPELAGNAGPLGSLMLAYPEYRRH

>B2\_PLANCTO gi|283781228|ref|YP\_003371983.1| ROK family protein [Pirellula staleyi DSM 6068]

MTHSHQPLWGAIEAGGTFKVCVVGYPGERLLARQQFATGANPAALMQQVVTWFLARQAEHGAL  
AGLGVASFGPVDLHPASRTYGGQITTPKPGWQNADILGPLRSALAGIPIALDTDVNGAALGEHRWGA  
AQGLDDFVYITAGTGIGGGGMARGRLLHGMVHPMGLHGLPRIAGDTFEGACPFHGRCWEGLCSG  
PAIAQRAGRPAETIPDDPAWDLTIRYMAHALANITYVLSPRKILGGSVRKAGLLGEEALFQQLRLRL  
REVLGYIASPALTQDGIETFVVPPTLGDGAGICGAIALAAQQIEPPAPSSSN

>B2\_SPIRO gi|307719480|ref|YP\_003875012.1| hypothetical protein STherm\_c18040 [Spirochaeta  
thermophila DSM 6192]

MLGGIEAGGTKWVC AVASSPDCILEEVRFPTTPEETIGRALSFFREMEARHGRLAALGIGCFGPVDV  
GEGSPSWGFITTPKPGWRDTGVAGVFQEELGVPVGFDTDNVAALGECYGAQQGLANVVYLT  
GTGIGAGVVVDGRPVHGLVHPEAGHVLRHPDDTYGGRCPFHGDCLEGMASGALAERWGMRG  
EIPPEHEAWRMEAFYLAQGVMLVLA VSPERVILGGGVMQQGHLPVLRSELLRLLAGYVGHPAIT  
EQVEDYLVPPGLGQRAGIVGALVLAARTAP

>B2\_Thermobaculum gi|269925285|ref|YP\_003321908.1| ROK family protein [Thermobaculum terrenum  
ATCC BAA-798]

MSSNNQVYGGIEAGGTFKVC AVGTGPDDIRSSITFPTTYPEETLEKAVSFFRQATKGLTLVAIGIASFGP  
VDPNPLSPTYGYITSTPKPGWANTNFAGYIRESLGVVGFDTDNVAALGEHRWGAAVGLETFYILT  
VGTGIGGGGLVNGKLIHGMHLHPMGLHAIPHDKKEEDPFEGWCKFKKDCLEGLASGPAIESRWGVRG  
ENLPADHPAWQLEAKYLAFGLVNYIYTLSPQRIIMGGGVMQQSHLPLIRQRVQHLLNGYIQADDVL  
QRIDQYIVPPKLGTRAGVLGAIALAQDTVGD

>B\_Acidobacteria\_4 tr|C1F498|C1F498\_ACIC5 ROK family protein OS=Acidobacterium capsulatum  
(strain ATCC 51196 / DSM 11244 / JCM 7670) GN=ACP\_1127 PE=4 SV=1

MRRIDLTRAELASSETARRINRDILLEIRARQPISRADLARVSGLQRSTVTSQIIIEQLIEELWIREGAVAR  
LPRGRRPTMLVLNEDVVVLTADLHPRKAAIAVIDLNGRVLSHAELSLSHDPAKVATAILECMRRLRQ  
AHPEKSFRGVGVSLPGRVDSQTQRLIFAPNLHWPDFDLRQALAKGLRMPVEMENANAACLTSELWF  
GRMQGVQNAVLITVSEGIGGGILANGQLVTGQNGMAGEFGHISLDPRGPRCGCGQRGCWETFASCK  
AALRHYQESSGASRIAYQDLLALGAEKNPHAVGALTEQARQIGRGLRLVIASLSPELVLIAGEVTS  
A WNLVAPALRKEMEAQWLGGMPTPRIPTFDSDAARLRGAAAMLQRRASAI DRNGKVKTKPKPRT

>B\_Actinobacter\_2 tr|Q9RFM6|Q9RFM6\_STRLI Putative xylose operon regulator OS=Streptomyces  
lividans GN=xylR PE=4 SV=1

MSAPPHEAQPAPRGRALPDTQQGMRRRNL SRVMHTVSAEGPLSRAAVASRIGLTRA AVSTLVDELIR  
SGLLEELGPERPGRVGRPGSALAVSGQPAGIGAEVGV DHLAVCAVDLRGRV RARAVRYGSNRGRS  
PEPVLEQLTGLVRQVVSQAETEG LWPAGLAVAVPGLVARDGRTVV RAPNL DWHADL GALLPADLP  
PTVDNEANFGALAEWLGDGTPRDFLHVS AEIGIGAAVVDGRLCAVPAGSPVSWGMCRSIPTGPGA  
PAVGAGAWNSTPVRRRSCARRAWSRGEDRVGLLAGRAAEGDEDVRRALREAGTALGIALTGAVNL  
LDPEAVVLGGALADSRPGCCRRCGTNWPGARRVPPARSRCPSWVRRAAARSRALRGPAVLDDPGA  
VAERA

>B\_Actinobacter\_4 tr|A1A0I4|A1A0I4\_BIFAA Transcriptional regulator OS=Bifidobacterium adolescentis  
(strain ATCC 15703 / DSM 20083) GN=BAD\_0436 PE=4 SV=1

MTAKRRILAFEIGTFFTRYVVFEDGRMGIPGTVATPVDSVESFYQALAHIVNGQRAPLDGIAMSVPGF  
IDVSKQVAVTAGALGMLYKHEIGKELQEYLDKPVPTWMENDANCAAMA EKLSGNAVKLDDFALITI  
DTGIGGALFLGGGIRRKDW RAGELGMMIPNYETGGFNTM QNYLSTIVLAEDYAKEFDVPTGSIVP  
ATLFRRLDEPRVRKIVDKWIDYLAIAIFNTAAATDPECILLGGGICREQQLLPMVNAALDRIPQWGDF  
RTSVKRCRHTNNA GLIGAYYAFETE VGGGLTDVPIR

>B\_Alpha gi|13476027|ref|NP\_107597.1| glucose kinase [Mesorhizobium loti MAFF303099]

MSIEAALAILDGGTELRAALVDRD GKILAFAAVPTQAQAGPDVVIGQIEAL AATVHAEAPGLAIVGV  
GVGAPGLDPLAGIAVGPPTLAGWQDVPLADILERRLGLPVRENDANAAALGEWRFGAGHGARS  
LVFVTVSTGIGGGVVADGRILHGRRLAAEIGHMTITNEGERCVCGVVGCFEAIASGTALGRRANAA  
TSAFDGSTLRRLSANA EVTGRHVVEAARLQDDLALALLEEEARWLGVGFTNLLHLYSPDVLVGG  
GIANGLDLMHPVIEATIRQRAMRAYRDVPVQAQLGRHAGLVGAASLVLFDDGSLAARMPVGPSTF  
PEARDFNG

>B\_ALPHA\_13 tr|B9JLU4|B9JLU4\_AGRRK Transcriptional regulator protein OS=Agrobacterium  
radiobacter (strain K84 / ATCC BAA-868) GN=Arad\_7079 PE=4 SV=1

MTEPAVATSSPRGIRQRNELAALRALYQFGPLSRAELARRLGLNRSSSGHIIAGLTLTGGLVREVSDDG  
QARGGHAHAGRPGIMIELVPGAVYFLGIEIGVEHISAVEIDLGGNIVSTTVEPFDGASAGVAATVERAI  
EMVLGAIPSSRLRCEGIGVAVPAQMDKHGfVRLAPLLRWENVQLAELVRESLPVSVVVAENDGN  
AFAIGASYGRNDKHSVTLFLVMESGVGGGIIANGSLFRGANGLAGEIGHLRISSEPSRSLEEVLG  
LEHIMTEYRKVPAVAAPTFGHFLADVDRVPGAVSIAEEWARALAFGLIQACRVIDADRIILGGSVAA  
LYPLMAARVAHHIQLAQEASFPLPSIGVNEEETVGPFAFGAACILHQRFLSLESQRFAEEAG

>B\_ALPHA\_14 tr|B9JL48|B9JL48\_AGRRK Transcriptional regulator protein OS=Agrobacterium  
radiobacter (strain K84 / ATCC BAA-868) GN=Arad\_9637 PE=4 SV=1

MKKVALAFDLGGTELRAALVDEEGNLLSFSAPVPTQAAEGPDAVVRQIEVLAATVLAKTPDLLPIGIGI  
GAPGPLDPEAGVVAIAPTLTGWNEVPLADILSSRFQLPVRENDANAAVGEWRYGAGRGARSIVF  
VTVSTGIGGGVIADSRILHGRRGLAAEIGHMTITNEGERCFGAVGCFEAVASGTALGRQATARTRS  
DGSMLRKL SANADVTGRHVDAARNGDALALELLNAEARWLIGFTNLLHLYSPDVLVMGGGISH  
GFDLLHDTIMATICDRAMPAYRDVPIVAAQLGRHAGLIGAASLILGSEAQASSEPSLVGSGNPDADIS  
AGTKEASNG

>B\_ALPHA\_15 tr|Q982N1|Q982N1\_RHILO Transcriptional regulator OS=Rhizobium loti GN=mll8569  
PE=4 SV=1

MALRGTNQEFGRPYNRRIVLESIRLHGPIARGEIASRVGLTVQTVSTIVRELEEQGYILSVREEPRGRG  
LPPATLRINPEGGYAVGIHITPLGINAALINLSGDVIESTYREAPNATPDHAFEMIGAMVIELTGLRAGG  
RVLGVGLALPGPFVSVESMSFVGPTTMTGWQDVALRERLAASGLPAFFETDMAAAAMGERLYGLG  
AQFSEYYYLYFGVGLGGVMVHEGSVQRGAWGNAGEVGHIPVVPVGGGEACPCGNRGCLERYLSLEAL  
RRWNGTEADWVAEVAPIFHNAVAVIENLFDPETVILGGLASTDLLERLAGSTGGLHNSVSARKDRIAP  
RLMVARGGQHSVLRGAAALAVSGVLSPRFGQMFAAERERGRDLLTAKEIAA

>B\_ALPHA\_19 tr|Q2RR18|Q2RR18\_RHORT N-acetylglucosamine kinase OS=Rhodospirillum rubrum  
(strain ATCC 11170 / NCIB 8255) GN=Rru\_A2630 PE=4 SV=1

MTLRLGLDLGGTKTEIHALDDEGRILLRRRRPSRAAYGATLDCLAALVTEAEAEELGRQGSVGVAMP  
GAISPASGLVKNANSHWLNGQLDHDLAERLGRPVRVANDADCFALSEATDGAAAGASSVFGVILG  
TGVGAGIVVNGRLLAGPNAIAGEWGHMPLPWPGDDEPDPDCYCGLKGCVETFCSPGLAADHQ  
KSTGHAIEGPALLALAQAQDAQAQASLDRHADRLARALAVVINILDPQVIVLGGGLGQMPHLYQAL  
PRLWTPWVFSRVDTRLVAPRHGDSSGVRGAAWLWPPSSTLETDPHA

>B\_ALPHA\_2 tr|B8GZM5|B8GZM5\_CAUCN Glucokinase OS=Caulobacter crescentus (strain NA1000 /  
CB15N) GN=CCNA\_02549 PE=4 SV=1

MIRFGVDFGGTKIEVAALNAAGDFVARVRKPNPGNYDEALEVVAALVADAESMAGGSCARLGLGIP  
GSISPTGLIRNANSTYLNRPFGENLETRLARPVRIANDANCLALSEAADGAGAGASVVFVAIVGT  
GCGGGVVVDGKIINGHNGIGGEWGHAPLPWPKEEYYPGDCWCGRKGLETWIAGPAFARDAGFA  
NGQAAMQAIGEDVKASAALDRYVDRLARSLAVVCDLIDPDIIVLGGGMSNVDALYERLPAAIAPH  
VFSDIFETPVKAVHGDSSGVRGAVWLWPPPEV

>B\_Alpha\_2 gi|222082872|ref|YP\_002542237.1| transcriptional regulator protein [Agrobacterium  
radiobacter K84]

MKKVALAFDLGGTELRAALVDEEGNLLSFSAPVPTQAAEGPDAVVRQIEVLAATVLAKTPDLLPIGIGI  
GAPGPLDPEAGVVAIAPTLTGWNEVPLADILSSRFQLPVRENDANAAVGEWRYGAGRGARSIVF  
VTVSTGIGGGVIADSRILHGRRGLAAEIGHMTITNEGERCFGAVGCFEAVASGTALGRQATARTRS  
DGSMLRKL SANADVTGRHVDAARNGDALALELLNAEARWLIGFTNLLHLYSPDVLVMGGGISH  
GFDLLHDTIMATICDRAMPAYRDVPIVAAQLGRHAGLIGAASLILGSEAQASSEPSLVGSGNPDADIS  
AGTKEASNG

>B\_ALPHA\_21 tr|B9J8H0|B9J8H0\_AGRRK Sugar transcriptional regulator protein OS=Agrobacterium  
radiobacter (strain K84 / ATCC BAA-868) GN=frcR PE=4 SV=1

MSPPQDPEETPTSPLILDPSGGANQVRVRAHNERLVLSLVRRHGALS KADIARRSGLSAQTVSVIMR  
ALEKDGLLSRGEVVRGRVQPSIPMRLNPDVLSFGVKIGRRSADLVLMDFVQGIRMQLHQIYPYPL  
PQDILSFVTSGIQELESRLNTEERGLAGLGAAPFELWNWAEVVGAPDGAMEVWRGVLDLQAEIAA  
RVYPVYQLQNDATSACGAELVFGVGHYPDFVYFFIGSFLGGGIVLNSSIFVGRGTAGALGPLPVRG  
RNGETLQLEIASIFVLENLLRDHGFDPQLWYSADNWDIFGEPLIWIQETAKALAQAIVAAAASVID  
FSAVIDGGFPNWVRERVRATIKEAAELDLQGVVMPPEIIEGMVGPQARAIGGASLPIFARYLIDQNI  
LFKEIEHAEGH

>B\_ALPHA\_27 tr|B8H3N8|B8H3N8\_CAUCN Fructokinase OS=Caulobacter crescentus (strain NA1000 /  
CB15N) GN=CCNA\_01192 PE=4 SV=1

MAGRPMSRIA AIELGGTKVMVAFGSGPDDLSPPLRIPTTTPAETLARIEDALAAEQGRFDAIGVASFG  
PIRLDPAAPDWGHILKTPKPGWVSHADVAARLVRRFDRPLALD TDVNGAAVAEGLWGAAKGLGDYA  
YVTVGTG VGVGLV VNGAPTHGLLHPEAGHILVRRDAALDPFTGSCPFGDCLEGLISGPALAARTG  
APGESLSKDDPVWALVADYLAQLVANLALIASPRRVIIGGGVGGNPQLLEQTRTRLQTHLAGYLAPL  
EQRSDIDAFVAAPGLGANSGLLGAVALGLRHDAILRQDLMP

>B\_Alpha\_3 gi|116248710|ref|YP\_764551.1| putative glucokinase [Rhizobium leguminosarum bv. viciae 3841]

MQQVAIGIDLGGTQVRAALVDEQGRILARAAEPTDALAGPDRVLAQICGLTDGLLAASNPA SVVGV  
GVSAPGPLDTVAGVASNIPTLSGFVDFPLKAELQKRFPFVDLEND AIAAAIGEWQFGAGKGLDNLV  
YVTVSTGIGGGVSDGRVVRGRKGMAAHVGHMSVVPNGELCPCGNRGC FEAYGSGTAFARRAQM  
RAMETSGTTIGSDGGAIDSRGVFAAARDGDRLANQLVDEEAEILGRGFTSLIHIFSPDIIVMGGLSHE  
FDRLQPGIQAYITQWAMPAFRDVKV VLAALDQNSGLVGA AALAFLTGKVP AIDQL

>B\_ALPHA\_3 tr|B9JJT4|B9JJT4\_AGRRK Transcriptional regulator protein OS=Agrobacterium radiobacter (strain K84 / ATCC BAA-868) GN=Arad\_9050 PE=4 SV=1

MKLKGDQSTSRAMNRRILNLLRQEGPKSRAEIATITGLSPA AVTFVIADLIEEGHVTEGKAVAGFSG  
RRPIPVEINYTNGLAIGFKLMVGSVECVVTDLATSPLASMR LTLADHDPENVAKTLAAAVPLLVQYA  
ARPNAQLAGIGISMPGVIDNDQATCVRSHRFNWNVPLASILAQKVKVPVWLEDDTNAYAIAQQLF  
GVGRQHRNMAVLAIGVGISCALIEGKLYRGANGAAGKFGHTLHEENGRLCECGKRGCLMAYHSQ  
TSMRLTWRETTNRSNSDGLPEMLNAVEEGEA AVGDILREAGIGIGKALANLVNVTDP EVIVVGG EAV  
SFG EAFF EPLRSTLAAHTFRASPPLLPDWEDNSWARGAAALVTQKFFDFETSGGTTGSTEALGTTSA  
A

>B\_ALPHA\_6 tr|A4WP29|A4WP29\_RHOS5 ROK family protein OS=Rhodobacter sphaeroides (strain ATCC 17025 / ATH 2.4.3) GN=Rsph17025\_0233 PE=4 SV=1

MTAGRPVAVPGREMTVRQGQETAERPAAAEPGLRGSNQSGMRARNERLVLSLVRRAGALAKSDIAR  
MTGLSAQT VSVIMRELERDGLLCRGEPIRGRIGQPSVPM SLAAEGAYFLGLKIGRRSAELVLIDFLGQ  
PVAARRRIYSYPTPDAVVDFTAEALPLLTGSLPPEARARVGGMGIAMPFQLWNWVQYV GAPQSEMD  
AWRERDIQTELAALTGLPVHLRNDATAACGAELVFGTGERPKDFLYFYFAYFIGGGLVLNGHLYAGR  
TGNAAGVGPMPVPDRSGRMRLN VASMSVLA EAMEQAGEDPAALWENPDHWEVSAPVLSDWL  
DGAAAGLASAILSASALVEMETVMIDGWMPPEIRAEMVRRTHAALHRLDLSGIEPPQIREGTVGAQ  
ARALGAAAIPLSQRYLVEAWGAAADG

>B\_ALPHA\_7 tr|A4WWD6|A4WWD6\_RHOS5 N-acetylglucosamine kinase OS=Rhodobacter sphaeroides (strain ATCC 17025 / ATH 2.4.3) GN=Rsph17025\_2813 PE=4 SV=1

MLIAFDIGGSRIRAARVFAPDHLEPLGELPMPSPFPGFIRALGQLVPRASRTVAISIAGVIDPASGRLTSA  
NLPVAVNGRRLAGDLAAALGRP VVWIGNDADCFVLTEARRGVARGHRNVFGIILGSGVGGGLVLDGAL  
VAGAGGITGEWGHGPVLDQRPLGHDL PRLRCGCGQTGCLDTVGGARGIERLHLHLSGRGLDSREIL  
SAWRAGEMAAAETVSVWLELVSGPLAVLVN VVGSSVVPVGGGLANDRDLVAALDRAVRQRLLRPT  
TEPVL RPAIHPEPGLVGAALAGLETFG

>B\_Aquificae tr|O67468|O67468\_AQUAE Transcriptional regulator (NagC/XylR family) OS=Aquifex aeolicus GN=xylR PE=4 SV=1

MKKGIDIGGTFIKVLWEDGKKEKH YIKDLKKDREALMEKIREVIKAGNPSGVGIAVAGFTSLNGIVY  
KSPNIPALDKTDFRKVLEDINIPFVVGNDVNLGAFGEWYYDYRDSKILLVAVGTGLGTGLVYKGEV  
FFGVCGSALEMGHHTVKKGGELCNCGRKGCWEAYCSSYAIEREYK KLTGRTLKDY EIAEKAKEGEE  
EALKVVESFKDY LITGLMNGVHIFNPDRIVLAGGVIETFKEFLRDVPEKVKEISEELPALCLKISFSRA  
GEFMGARGALAYALKYL

>B\_Aquificae\_2 tr|C0QRM3|C0QRM3\_PERMH Xylose repressor OS=Persephonella marina (strain DSM 14350 / EX-H1) GN=PERMA\_1552 PE=4 SV=1

MRRYLGDIGGTFIKFVYKKGDDIEKGKVYIREIISKNRPD LIVDEIRKIVKKYRPDILGVAVAGLIDKK  
TGVL TASPNIKPLENFPFKDELENSLKIPVYIENDASLAAYGEYLYGAGKGSEILICLTLGTGLGGGAVI  
NGKLLTGVS GSAMEIGHTTIEMDGLPCHCGRKG CLESYVSSYGLERIYYLYTDQKISSSQIITLANEG  
DLTAMRSMERFSEYLSVGLMNIVHIFNPDRIVLAGGITENYPAVVDMAVSNLKNIAFHLPFRDLTVKR  
AELKEFSGAYGALGYAENESR

>B\_Bacteriodes tr|A7V3D0|A7V3D0\_BACUN Putative uncharacterized protein OS=Bacteroides uniformis ATCC 8492 GN=BACUNI\_02075 PE=4 SV=1

MNQALLKEIEMGSKNALLKKRIITHYIYNGSSTITDLSKELDLSVPTVTKFISEMCDDGYINDYGKLE  
TSGGRHPSLYGLNPESGYFIGVDIKKFAINIGLINFKGMVELKMNIPYKFENTQEALEKLCCLISNFT  
KKAGINPEKVLNICINISGRVNPESGYSFSMFNFSELPLAEVLAKKIGYSVCIDNDTRAMTYGEYMQG  
CVKGEKNIIFVNVSWGLGIGIHDGKVYTGKSGFSGEFGHINVDNEILCHCGKKGCLETEASGSALH  
RILLERINNGECSILSSRIATKEDPLTLDEIIAAVNQEDLLCIEIVEEIGQKLGKQIAGLINLFPNELVIIGG  
TSLTGDYITQPIKTAVRKYSNLVNVKDSVIITSKLDKAGIVGACMLARSRMFES

>B\_Bacterioidetes\_6 tr|A7V6R2|A7V6R2\_BACUN Putative uncharacterized protein OS=Bacteroides  
uniformis ATCC 8492 GN=BACUNI\_03275 PE=4 SV=1

MLNTLMLYTMKLSIDLGGTNIRIAQVEKGNCLNKVSVPCLAQQDASTVLNQLSQLIRNMMNEQVD  
GIGIGVPSIVDPEKGIVYNVANISSWKEIHLKEILENEFKVAVAINNDSNCF TLGESLYGEGKSYTNMV  
GVTIGTGIGAGVVIGRRLYGGQYMGAGEIGSFYLDSDFEHYCSSFLFKRYGTTGAVVAEKAQQGEQ  
AALEIWKEFGRHLGNLIKAILFAYAPQAIVLGGGIVSAFPFFKNAMEQTMQSFYKIISDNVSVVASH  
QKDSLLGAAALLE

>B\_BETA tr|C0YC21|C0YC21\_BURPS ROK family protein OS=Burkholderia pseudomallei Pakistan 9  
GN=BUH\_4484 PE=4 SV=1

MRSPLHGQGSNSANVRRYNERLLLKTLRRAGSASKADLARLANLTGTAVGSIIASLAEAKLIEFAGR  
RAEGQRGQPASLIRLDPRGAFGIGVRLDRMRIETALVNFAGDVIARRSHDTLLPQPAVLEIVREDVA  
AMQQLLCAHERARLTGVGVAQPYNLGSLWREIDLPAFGAWAEVDFARELDRAIELPVFSENDGN  
AAIAELFYGCGRQRDDFVYFLGPAIGGGIAVDGDCLRGVTGNAGDFAMMPVPPSRLPSVPKPSG  
AWDLLITRASLNGLARHLRHRGETLESRADLEACIARGGQAVDEWIDDCVDALAPALRAVLAVLESP  
VVVLDADTDAGLIDTLIARLHTALAAPEARGTPVLVRGTFGPDAGAIGAATLPMFFNFSPRAGILR  
GAGVDSQEARYAAF

>B\_BETA\_2 tr|Q3SGS8|Q3SGS8\_THIDA ROK family protein OS=Thiobacillus denitrificans (strain ATCC  
25259) GN=Tbd\_2216 PE=4 SV=1

MAPSLRFGIDLGGSKIELIALDRDREILRRRVPTPGDYPTVAIAALVGHAEGLGQQGSVGVGT  
PGAVSPASGRMKNCNSTCLNGQPLREDLERALGREVRVANDANCLALSEATDGSAAAGAESVFGVIL  
GTGVGGGVVVHGRLLQGANAIAGEWGHSPLPYFQFAGA QADRAMTGHPATGEAIVHPWPQPREL  
DAAPACYCGKKGCJETWLSGPGLAADHVRYGGEDLPAHEIVQLANAGYGPCSATLARYEERLALAL  
AGVINLVDPDVLVGGGLSNIARLYDTPRLWPRYVFSRVDTKFVPPKYGDSSGVRGAOWLWE

>B\_Chlamydiae tr|Q6MCP0|Q6MCP0\_PARUW Putative glucokinase OS=Protochlamydia amoebophila  
(strain UWE25) GN=glk PE=4 SV=1

MLKETDCVIGIDLGGTKIGIGVLNVSGTLIDSVRLKTDKFKHPASVEKQIMQAIQDLKNRTKVEIKGI  
GIGVAGQIDEETGVVRFAPNLPWHQVTLRKNLEREAIEPVKVVNDVRAITWGEWLYGAGKHYQD  
LICLVGTGIGSGIVCQGMQKGDNNTFGEVGHMTIDFHGPRCTCGNNGCFEAFAGGWGIARQAKE  
LILADNQSGQSILEKAGGYLENVSAKAVIEAYHSGDPLALLILEKVKQALIAGCINLVNAFNPAACLILG  
GGVLDGIPEILSFIDKGIRETALKTATDKLQIKTALLGKNVGIIGSGAVILDVLKNNVG

>B\_CHLOROBI tr|B3EGU5|B3EGU5\_CHLL2 ROK family protein OS=Chlorobium limicola (strain DSM  
245 / NBRC 103803) GN=Clim\_2184 PE=4 SV=1

MSQWAIGIDLGGTAVKAAIVSRKKGILKNRTVPTDTASGPEGIVSQLAVMIASLYTEASAELSRQDFS  
GIGFGAPGAVDIEAGTLYPPNLPGWTTFPLRSELERALLAKLPKSVPVVIENDANAAAYGEAVYGA  
GRNFRDFLMVTLGTGVGGGIVLNRKLYRGPNGTAGEIGFMIVDFQSPAVHAGIHGTIEGMIGKERIVE  
YACGLIRDNPEAGSLLASLCGQDFSSLSPRHIEQAAKMGDQLSLAVWNHVGAILGTGFACVTSLMDI  
RKFFVIGGGISAAGTLIFEPAYRQLLRSTLPSMHDGLELPAELGNSAGIYGAAALCFS

>B\_Cyanobacteria tr|Q065Y2|Q065Y2\_9SYNE ROK family sugar kinase OS=Synechococcus sp. BL107  
GN=BL107\_14345 PE=4 SV=1

MSSDQVIGIDLGGTAIKLARFNRSQDVLAEQLIPTPQPPVPGAVTMALCEAIDQLDPDHLADLVGVG  
LPGPMDANARVARVCINLSGWDDVPLADWLEPRLQRQVTLANDGNCAVVGAEWLGAARGFEDVV  
LLTLGTGVGGVILGGALFTGHNGAAAEPGLIGHPDGPPCNSGNQGSLEQFASIAALRRLCDVDPRE  
LSDRADAGDLQAKAIWQYGTTLGVGIASLVYVFTFQRVLLGGGLAAASAHFLPDVRREVEARVQ  
AVSREGLSIEACALGNGAGRLGAARLALQRLSG

>B\_Cyanobacteria gi|119490672|ref|ZP\_01623077.1| ROK [Lyngbya sp. PCC 8106]



MNNKILALDFGGTKLAAATLISGQQKWQNTRRQLSGNSPNATTDLEIMRSLIRELLGNEKPLAIGISF  
GGPVDAKTGIVRLSHHVSGWENVPLREILEAEFNVVPRVDNDANVAALGEYKFGAGQGCESLLYIT  
VSTGVGGGWILNNRLWQGTQGMAGEIGHTVVQPDGPLCLCGKRGCVERLASGPYIAQQVRQSLNK  
QPQQGEILRHLVNHQLDKITAEIVSQAANEGDELQNAIKLAGWAIGVGIGNAANLINPQRFILGGGV  
TKAGDLFWHQVRQISRQTALPEVDFEIVSAQLGDEAPLWGAVALAETGLEN

>B\_Cyanobacteria\_5 tr|Q3MAV3|Q3MAV3\_ANAVT ROK OS=Anabaena variabilis (strain ATCC 29413 / PCC 7937) GN=Ava\_2265 PE=4 SV=1

MISAVVVWCEELNVGNSQVIGIDLGGTAIKLGRFSEDGTCSQSLTVETPQPATPEAVFLVMVDAIAQI  
DPDNETIAIGVGTGPADAQGRIAQIAINLPQWENVPLADWLETKTNKPTVIENDANCAGIAEAWLG  
AGRHYQNFIMLTGTGVGGAIFLDGKLFVGHARGAAGELGLITLQPDGPMCKSGNPGSLEQYTSIKAI  
RRLTGKEPAELGMLAQAGDIEALQFWQEYQNLGIGLTSLIYVLTQPQAVLGGGVSASHEFFLPTLKA  
EIEQRMSTSRAGLQILPAELGNSAGMVGAARLAWKKFGNG

>B\_DELTA\_2 tr|A0LFI7|A0LFI7\_SYNFM N-acetylglucosamine kinase OS=Syntrophobacter fumaroxidans (strain DSM 10017 / MPOB) GN=Sfum\_0489 PE=4 SV=1

MLRLGVDLGGTKIEIIALDDGGNELARFREATPRGDYRSTLEAVARLVSKVEAELGGERGSVIGITPG  
AVSRATGLLRNSNSVCLNGKPIARDLEAVLGRPVIANDANCFALSEYRDGAARGARVVFGAIVGTG  
TGAGIVVGGEVLEGVNAIAGEWGHNPWPDKDERPGPRCYCGRYGCIETFLSGPGMAALHALSTG  
DRLPPEEIVARADEGDPSCEHTLLRYEDRMARSLAHVINILDPDVIVLGGGMSNIRRLYRNVPRLWG  
AYVFSRVDTRLVPPRFGDSSGVRGAAWLWG

>B\_DELTA\_4 tr|A0LJN6|A0LJN6\_SYNFM ROK family protein OS=Syntrophobacter fumaroxidans (strain DSM 10017 / MPOB) GN=Sfum\_1953 PE=4 SV=1

MSSKRYAVGVDLGGTKIAVALVDDRGEVLKHARYLTFVREGPEAVRDQIIGAVKEIRKGTKTRPAGIG  
IGVAGQIARDDGMVRFAPNLGWRNIPLGEQLRAITRLRVVVNDVRAAAAGEWAFGAGKDCGDLI  
CMFVGTGIGGGIVAQGRMLHGCNSAGEIGHVVDMNGPLCHCGRRCMEALAGGWAIAQKARD  
AILLDPALGTPLLRLAKGQINNVTTTELAVATAFRMGDPLARQLIDRAAEALSVGAVSLVNAFNPCRLIL  
GGGVVNGLPELIERVREGIRHHALVTAESVTVVPASLGDDAGVIGAAVLAMQSPA

>B\_DELTA\_5 tr|C4XQQ9|C4XQQ9\_DESMR Fructokinase OS=Desulfovibrio magneticus (strain ATCC 700980 / DSM 13731 / RS-1) GN=scrK PE=4 SV=1

MGEKAFRGAVEAGGTFKFCVAVGAGLDDIRPENRAVFPTGDDPAATLAAVAGWLKSREDRRGAPL  
AALGVASFPGVCLDKALPDYGRVMTTPKPGWSGFDLLGALGRAFPGRPIGFDTDVNGAALGEREW  
GAARGLDDFLYVTIGTGIGVGGLAGGRLLHGLTHPEMGHIGLRRLAGDVFPGVCPFHGDCWEGLCS  
GPAMAARTGTAAEDLSADHPAWEHEAAYVAEALATVTYALSPRRIILGGSVPKGGRLGEEGFFAKVR  
ERFVATLGGYLPDERLTARVAEYIVPPGLGELAGVAGAYCLACAAPGGREGETRPKP

>B\_DELTA\_9 tr|Q1CYA3|Q1CYA3\_MYXXD Glucokinase OS=Myxococcus xanthus (strain DK 1622) GN=glcK PE=4 SV=1

MPTLGIDLGGTFARAADVDEVGKLIASSKVALVERSPSGVETIAQAASDAVMAAGVPLGACGVAA  
AGQIHKDSGVLSVAPNLGWRNVPLGALLTDRLGQPVRVVNDLAAAANGELHAGAGRGSQDMLVV  
FVGSVGSIIAGGRLVDGGGGVAGELGHKVVPGGRRCGCGELGCLEAYAGGHNLIAQTRELLAS  
GGAPEVARLTGGDPARITPVTLEQAAEAGDVAAGEVYARAAQFLALAVANQVTMLNPARLVLGGGV  
LRHCPGLRRRVEEGVRAWSSTTSREGLLIADAELGDDSGLIGAALLVK

>B\_Dictyoglomi tr|B5YAN7|B5YAN7\_DICT6 Transcriptional regulator, XylR-related OS=Dictyoglomus thermophilum (strain ATCC 35947 / DSM 3960 / H-6-12) GN=DICTH\_1696 PE=4 SV=1

MVFIRTGRGGRASQQREVNKTIILNAFLRCRNISRTEIAKRFNLSKSTVTRLVNTLIDEGMIIEIEPSSE  
KKIGRKAIVLGLNPEYKNALAIKVGVTHTYLSKIDFAMNIKEIKSFLTPKNPQDFLDKLEEYTKMLFP  
EGLNKTHAVGIGIPGIVDNTFKNVVAPNLNWKNLPLGDMIADRIKKVFSVEIPVKMDNEANMAVV  
AEGMLGTKIEYNLIVYVYVGEIGITGLILDGKLYRGRYNTAGEFGHMTVMKDGLKCKCGNLGC  
WERYASLGSEIALKAGFDSEKETVEVSDEKVLKKYINELAIGLINIINGLNPDVIIILGGPLIKKDTKEV  
WEFIRQEIKKIVEEKSITSDAGKVRIELTSFLDYPVELVAGIWAFFWDIFEGPVLSTV

>B\_EPSILON tr|A6Q9R4|A6Q9R4\_SULNB Putative uncharacterized protein OS=Sulfurovum sp. (strain NBC37-1) GN=SUN\_1270 PE=4 SV=1

MSKLYIDIGGTYLRSELLKNGKTFKEKVSSRGISLSEYLEQKLGAYPDIAEIGISFAGQVDHGKIVSSP  
NIAVKEYDIKKYIEKKYPVSLKIDNDLNCAMLAEKEDIKRKNMALLYIGTGMGSAVLEQGEIVRGER  
NLAYEIGHVPPFKKAPFRFCGCGKDNCLFSSGSLKKWYTYGLPQMTLEELRKSCKDKYAKKIYQN  
FQEGLFRAAATLVTLANPKVLVLGGGVVSANHFLKEKVEKKIGKYALASNLEGLEIKLSQLKNASIE  
GAKQL

>B\_FIRMIC tr|A5LLF6|A5LLF6\_STRPN ROK family protein OS=Streptococcus pneumoniae SP6-BS73  
GN=CGSSp6BS73\_09359 PE=4 SV=1  
MTYYVAIDIGGTNIKYGLVDQEGQLLESHEMPTEAHKGGPHILQKTKDIVASYLEKGPVAGVAISSAG  
MVDPKGEIFYAGPQIPNYAGTQFKKEIEESFTIPCEIENDVNCAGLAEAVSGSGKGASVTLCLTIGTG  
IGGCLIMDRKVFHGFNSACEVGYMHMQDGAQDLASTTALVKYVAEAHGEDVDQWNGRRIFKEA  
TEGNKICMEGIDRMVDYLKGLANICYVANPEVVILGGGIMGQEAILKPKIRTALKEALVPSLAEKT  
RLEFAHHQNTAGMLGAYYHFKTKQS

>B\_FIRMIC\_14 tr|B2TPN7|B2TPN7\_CLOBB ROK family protein OS=Clostridium botulinum (strain  
Eklund 17B / Type B) GN=CLL\_A3008 PE=4 SV=1  
MANSGTIKNININSIRNILDNSKSMKSDIARYTGLSFPTVSNTIEYLLEKGEVIDCGLKDSSGGRCAC  
NYSLNPMYLVSLSLYLEGFEIYWFITDHCGNKIQDGRKNCKNKILKCIEDTIISMKLNYSQLASIMIGI  
ASNINSGKITSHMEYEELYDIDVIKYLKDKYEIPINVENDMKVAARGYWARHENKDIQAVASIYMGK  
NGMGSNMVIDGKIWSGTSNFAGEIHYPINGDSKKYPMYEFNDIDTIVQYYGKIIQSYIALINPNLIV  
LYSNSYIIDKLEEKFYCKCRIPENAMPKIIISDEFIEDYGLSKMANELMD

>B\_FIRMIC\_15 tr|B2TQR4|B2TQR4\_CLOBB ROK family protein OS=Clostridium botulinum (strain  
Eklund 17B / Type B) GN=CLL\_A3335 PE=4 SV=1  
MIKKQVNNMEVKKNNRNRIFRYLCKCDKTSNSEIAYELKMSVPTVAQNTKELMERGLIEETGEFQS  
TGRRRAKAFSVIDSRLAVGLDITKNHFGLLTNLKGEILKYDRFDYQYSNDKLYYCEIDKKIEEFLG  
KNLRNRETILGIGISFPGIVNLEKEIVSYSHMLGLQTLFTEVSQFFSYPCFLNDANAGAYAEGINKE  
FQKRFFYLSLNTVGGAIKFCDELQGENFRFCGEVGHITVIPDGVPCYCGKLGCLDVYCSAKNLSDV  
TDGKLSLFFTALERKEKEILKIWDKYTTYLSVAINNIHMVLDLDCIILGGYVGSYLENHINDIRQKVLQ  
RNTFSEDGMFVKTCNYKVGAAAFGAALKVIEAFIKQV

>B\_FIRMIC\_17 tr|B3WBA9|B3WBA9\_LACCB Transcriptional regulator OS=Lactobacillus casei (strain  
BL23) GN=LCABL\_29280 PE=4 SV=1  
MQYLAIDVGGTTTKYGLVSATGALSQQGEQPTMRASLADFMASLTGLIRLHKAHVAGIGLALPGVI  
DSQQGLVKASATLPFLEGLVLGTQLTTAADLTPILIENDGNAAALAEHWRGNLAGTMNSAMVVLG  
TGVGASLFLNGQLYHGSHVAGEPSFMVTNGLTPIMREQTAAGLSAVATINAMADTLGVHEEPGQR  
VFQALDNTSEAAVILRTFTRGVAAMIYNMQTVLDLEKVIIGGGISAQPRVIKEIRDDIEAYQQVTSLS  
ARTIRLPVVEPAKYRNAANLIGAVAPLVVRG

>B\_FIRMIC\_2 tr|A5LN49|A5LN49\_STRPN Fructokinase OS=Streptococcus pneumoniae SP6-BS73  
GN=CGSSp6BS73\_07779 PE=4 SV=1  
MTKLYGSLEAGGTFVCAVGDENFNVVEKTQFPPTTPIETIDKTIEFFSKFDNLAGLAVGSGFPIDIDK  
NSKTYGFITTPKPNWANVDLLGALRRALNVPMYFTTDVNSSAYGEMVARNNAGGRIENLVYYTIG  
TGIGAGVIQRGEFIGGVGHPMGHYYVARHPMDIEKEFKGVCPPHKGCLEGYAAGPSLEARTGVRG  
ETIELNNPVWDVQAYYIAQAAVNATVTRPDVIVFGGGVMMAQQHMLDRVREKFTSLNNGYLPVPD  
VRDYIVTPAVAGNGSATLGNFVLAKEVSK

>B\_FIRMIC\_4 tr|Q4MXR3|Q4MXR3\_BACCE Transcription regulator protein OS=Bacillus cereus G9241  
GN=BCE\_G9241\_3299 PE=4 SV=1  
MLVKVVDLSEQFVTQKSIKETILRGIRKVLLEGRSATAKVELSNTLEISFPTISKFIEKMKQDGEVTLA  
GLDDSSGGRRAKRYEYNPEYMLGLAIFLEKNETNYTIFNCLGEVKEQGSTSSMLIDTGVNLLSKHIE  
GLIATFPKISSISIGVPGSDNGRIFYIPGYEKFNFNLSHLEEQFSMPVVIENDMNAAVLGYYKNTG  
NYDNSSLVYLYSGQNGPGAGIMVNGDVVRGSTFFSGEISFVPQYDNKNFLQALRSEDSNNPEEYNID  
AITRLIATCIAINPHGFIFCDDEVNQFVIDQIVKSCPQYIPAEHIPKITVSNWKEDYLYGLKSLGLDLMI  
TRTNKEN

>B\_FIRMIC\_6 tr|Q4MQF6|Q4MQF6\_BACCE ROK family protein OS=Bacillus cereus G9241 GN=xylR-2  
PE=4 SV=1  
MKEYIAFDIGGTQIKYGIVSETGTVLKHKTVPTIEHLGGEQIIQKLILLSKMLMGEHTILGIGISTAGIV  
DVNKGIVTGGADHIPGYSTIPIINRLQEVLKVPVSIDNDVNCAAFGEKWNGSGREKGNFIMLTLGTGI  
GGAIIFIDGELYRGHSFSAGEWGNMLIEGKAFFEEVASISGLIHLVRKYKGEGDWNGKTIFELYDKGDR  
EVTQAVEVFFKHLAIGISNLAYIFNPEMIVIGGGITDRGNQFLKEVKEEVEKYLQKEIYNNCEIELAQN  
GNCAGMIGSIYHFLHHHK

>B\_Firmicute gi|239624996|ref|ZP\_04668027.1| ROK domain containing protein [Clostridiales bacterium  
1\_7\_47\_FAA]

MRFDKYVMAQMNKKMILNMIIQKGPINRAEIARLSGLSVPTVMKITDEFSQSRLIRTIGKRESTGGR  
QPELIEINKEEYFCIGLDVGHNRLLKVVVMNLAGEIKLRRAPTGDTLPPETAIRYRMISLVREILGGMGE  
QKQRLGLGIGMPGLDPDTGMVNFSPDFGWEHVDLLGRFQNEFGFPVLIENANRVMALGERWFG  
AGRSAEDFLCVNLGHGIGSALVFDGEIYHGNSGSSGEIGHITLEKDGPLCECGNHGCLEALASGRAIA  
KHGLELAASGKGKRILELAGGRKEEIEAETIFRAAMEGDGEAEDILDNAIEYIGIAIAGVVNLFDP  
ELIFEGGLMKSSSYLLPRLKETIRRHQMHLAGRNQVLLKGNLGEDITAVGAATLLLQDLLNHGGEIKK  
GR

>B\_GAMMA\_sp|P44554|NAGK\_HAEIN N-acetyl-D-glucosamine kinase OS=Haemophilus influenzae  
GN=nagK PE=3 SV=2

MYYGDLIGGTKIELAVFNEKLEKLYSERVPTPKTDYEEWLNITVDLVNRADEKFGVEVGTVGLGVP  
GFVNQQTGLAEIANIRVADNKPILCDLSTRLGREVRAENDANCFALSEAWDTENQQYSTVLGLILGT  
GFGGGFVLNGKVHSGQVGMAGELGHLQLNYHALKLLGWDNAPIYQCGCGNKACLDNYLSGRGFEM  
LYQDLKGETLSARKIINLFYQSNESAVDFVNLVVELAAISIGNIITAFDPHMIVLGGGLSNFDYLYEALP  
KALPPHLMRKAKVPIKKAKHGDSGGVARGAAALFLTK

>B\_GAMMA\_10 tr|C21369|C21369\_VIBCH ROK family protein OS=Vibrio cholerae TM 11079-80  
GN=VIF\_001087 PE=4 SV=1

MYYGFDVGGTKIEFGAFNAQLERVATERVATPTDDYAKLVETIAGLVHKEYDAQFGVEVGTVGLGIP  
GMEDADNGCVLTVNVPAAKGGKPLRADLEAKLGRAVKVENDANCFALSEAWDDELKEAASVMGLIL  
GTGFGGGLVYEGKVFSGRNHVAGEIGHMRLPIDAWFHLGEKAPLLGCGCGNKGCMDNYLSGRGFEM  
LLYEHYYGEKKKAIEIITAQKEGEAKAVEHVERFMELLAICFANIFTANDPHVVVLGGGLSNYDLIYE  
EMPKRVPKHLSSVAKCPKIVKAKHGDSGGVARGAAALFLTK

>B\_GAMMA\_14 tr|B5NZT5|B5NZT5\_SALET Transcriptional regulator Mic OS=Salmonella enterica  
subsp. enterica serovar Heidelberg str. SL486 GN=mic PE=4 SV=1

MVADSQPGHIDQIKQTNAGAVYRLIDQLGPVSRIDLSRLAQLAPASITKIVREMLEAHLVQELEIKEA  
GSRGRPAVGLMVETEAWHYLSIRISRGEIFLALRDLSSKLVVEECLPLPLTEATPLLERIITHVDRFFTR  
HQQKLERLTSIAITLPGIIDTENGVVHRMPYEDVKEMPLGDALERTGVPVYIQHDISAWTMAEAL  
FGASRGARDVIQVVIDHNVGAGVITDGHLLHAGSSSLVEIGHTQVDPYKRCYCGNHGCLETIASV  
DSVLELTQLRLNQSMSSMLHGQPLTVDSLCAAMQGDLLAKDIISGVGTHVGRILAIMVNLFNPQKI  
LIGSPLSKAADILFPAIADSIRQQALPAYSRNTVVESTQFTNQGTMAGAALVKDAMYNGSLLIRLLQG

>B\_GAMMA\_17 tr|Q48D96|Q48D96\_PSE14 ROK family protein OS=Pseudomonas syringae pv.  
phaseolicola (strain 1448A / Race 6) GN=PSPPH\_4529 PE=4 SV=1

MPLDLDTPLHAHQPLSMNERKLLDILRRRGVITRATVSTEMDLAQQSVHRLIEELISRGLLRSGERVK  
NGRGQSPRIELVNEAVYVIGVSINTDSAVVCIADLGCNVLEQVTLRTPPLSRNSTLDSLDQTIERMLQ  
RNGIEAQRVIGMGFAIAGFFLENRQINAPEPLRDWLSLIDLPILLEERFGMPVWLENNATTAAGESLVG  
VGAWASNFIYLSFNFGFGAGVVINGKPYFGSHGNAGEITLYNDEESINRPALRYLLDELHQNGVQVD  
SIEDLRLRFPDPWPGVDTWLARVKPTLDRLVNALAGLFDPPQAVVFGGQLPPELGRRLIAATAFWGA  
HRYNAPPPRPQLLLSETNGDAAAIGAALVPLKERFFV

>B\_GAMMA\_19 tr|A9KUF8|A9KUF8\_SHEB9 ROK family protein OS=Shewanella baltica (strain OS195)  
GN=Sbal195\_1433 PE=4 SV=1

MSVLCLDLGGTKLMLAQVEGKTLLDTWRYVPVADGNFEQLFDLVTCTIHSHTPETYGISIGIPGMV  
DMQSGTLLEVLNIPALTATQLAQQLKNTFEMDVVNNDANLFLALGEAVLNRNQDMLGITLGTGVG  
AGVIFNGQLYSGKHCAAGEIGSLSYRDGIIIEHYCSGQYFTTHHHMSGEHLYQKACEGDSQALQAF  
HFGEHLAHMIAQTLVYDPKDIILGGSVSQSFPFFIEALNQLQSLVYGPQLADLTISASQHHNAALIG  
AAQWFLQKDSVK

>B\_GAMMA\_20 tr|A9KVD9|A9KVD9\_SHEB9 ROK family protein OS=Shewanella baltica (strain  
OS195) GN=Sbal195\_1506 PE=4 SV=1

MMRMGVDLGGTKIELVALSDEGNELFRKRVTTPRDYQGTAAVNVNLVKEAEATLGEQGTGTVGVIPG  
VVSPYGLVKNANSTWINGHPLDVLGELLQREVRVANDANCFAVSESVDGAAAGASVVFVGIIGT  
GCGAGVAINGKVHGGGNGIGGEWGHNPWPMTKEEFNTTRCFGNPDCIETFISGTGFVRDYNAAL  
TAAGTVRAAAKSGADIMLLVDEGDAIVAADFDRYMDRLARSLAHVINMLDPDAIVLGGGMSNVAAI  
YPRLPALLAHYVVGRECHTPVVQONLYGCSSGVARGAAALFLTK

>B\_GAMMA\_23 tr|Q3BZN1|Q3BZN1\_XANC5 Putative transcriptional regulator, ROK family  
OS=Xanthomonas campestris pv. vesicatoria (strain 85-10) GN=XCV0051 PE=4 SV=1

MGAGRGMQQAHTISTSVAPTQGRGRIKLSCLIKAIMTTTNVSPCMPSLFANAAIRSHYRRRSDGQA  
AGSSERLLLDLIRRAGQFERADLPRASGLVPGIKGIVDPLVAHGLLQLRPSLRGRGQPNAQVSLVP  
GYAYSVGVSVMDGFAVVLIDFAGQVRGMRQLTAFPLTLAVVRAQLPALVEALLTAAGVDRQHVFG  
VGLSMTGPRIGDGRVNPPLSLAAEWMQVELDRFVADCLQPVWMDNDAHCAALAEAVYGIGRQS  
PDLVYLSISDGFAAGVIAAGNVRRGAHNGGELGRISAITGMARPTLESLRQALAADGHALPDLHT  
MLQHYDAAWPQIDAWLDAVEPTVTLAVAIIIALIDPRVIVFGARLPTDLAQRLIARIAFEPAPRRGVAL  
PYPTLQVGQVTAHATVLGAAML PFKETLF

>B\_GAMMA\_6 tr|B5P1P9|B5P1P9\_SALET Putative transcriptional regulator OS=Salmonella enterica  
subsp. enterica serovar Heidelberg str. SL486 GN=SeHB\_A3830 PE=4 SV=1

MQQYIGIDVGGTHVKYGVINS DGEELTHHQFDTPE DASTFTRKWQDVVARCQQDYDIAAIGVSFPG  
HINPHNGHAAKAGALAYLDDVNLME LFSGLTDLPLVVENDANCAALGEMWRGAGQHYNLVCITI  
GTGIGGGIIVGRELYRGAHFHAGEFGVMPVGNNGESMHKIASTSGLMASCRQALALPAEEMPADVI  
FERMATDVHLREAVNDWARYLSRGVYSVISMFDPGVMLIGGGISEQEKL YPLLTRHLET FEMWEAL  
QVPIQPCQLGNQAGRLGAVWLAQQKLARS

>B\_GAMMA\_7 tr|B5P7Q5|B5P7Q5\_SALET N-acetylglucosamine kinase OS=Salmonella enterica subsp.  
enterica serovar Heidelberg str. SL486 GN=nagK PE=4 SV=1

MYYGFDIGGTKIALGVFDSTRRLQWEKRVPTPHASYS AFLDAVCELVAEADQRFVKGSGVIGIPGM  
PETEDGTYAANVPAASGKPLRADLSARLDRDVR LDNDANCFALSEAWDDEFTQYPLVMGLILGTG  
VGGGLVLNGKPITGQSYITG EFGHMLRPVDAL TLMGDFPLRRCGCGQMGIENYLSGRGFAWLYQ  
HYDQSLQAPEIIALWEQGDEQAHAHVERYLDLLAVCLGNILTIVDPDLLVIGGGLSNFTAITTQLAE  
RLPRHLLPVARAPRIERARHG DAGGMRGA AFLHLTD

>B\_GAMMA\_8 tr|A7JDW5|A7JDW5\_FRATT ROK family protein OS=Francisella tularensis subsp.  
tularensis FSC033 GN=FTBG\_01633 PE=4 SV=1

MYLAGIEAGGTKFFTTIGDFDGNVIERHRTDTT TSEKTMSEVLKVLKDYQNKYDIKTIGLACFGPIDI  
NPNSKTYGYITNTPKIAWQNF DIVNAVKTIFSGPIGFNTDVNAAAICEKLWGCAQDLENLLYLT VGTG  
VGGGIICNNKLVQGAMHPEIGHLLIPQNPLDEFK GSCPFHGNCLEGLASGTAINQRWKVAHAGALND  
DHIAWQFEAEYLAKAIVNYICSFSPERIILGGGVMHK TILFDMIRKNVTKYLN NYLDYPALKDMTKFI  
VPASFGDNTGVKGLALALETFNNSQAY

>B\_GAMMA\_9 tr|C2IAQ3|C2IAQ3\_VIBCH N-acetylglucosamine-6P-responsive transcriptional repressor  
NagC ROK family OS=Vibrio cholerae TM 11079-80 GN=VIF\_000070 PE=4 SV=1

MIMNGGQIGNVDLVKQLNSAAVYRLIDQQGPISRIQVADVSQ LAPASVTKITRQLLERGLIKEVAQQA  
STGGRRRAISLTTEVKPFHSIAVRIGRDYIQLS LYL DGGNSLVDEHHEFH YNTQDVLMS SLIKQIKQFIQ  
QHTALIDQLIAIGVALPGLVNPETGVVEYMPNVAINELPLGATIRDEFHVECFVGN DVRGIALAEHYF  
GASQDCQDSILVSVHRGTGAGIIVNGQVFLGYNRNVGEIGHIQIDPLGEQCQCGNFGCLET VATNPAI  
TSRVKLLIAQGYESSLSTLDTITIDDVCEHANAGDELAKQALVRVGNQLGKAIAITVNL FNPQKIVIA  
GQITAAKEIVFPAIQRNVENQSLKTFHQHLP IVSSQVYKQPTMGAFAMIKRAMLNGVLLQK LLED

>B\_SPIRO\_2 tr|B9AAM9|B9AAM9\_BORBU Xylose operon regulatory protein OS=Borrelia burgdorferi  
72a GN=BBU72A\_0857 PE=4 SV=1

MKHYLAIDIGGTSTKYSLSDSSGVFFDKNEISTGATSDEQVNILVNIINSYKELSDIAGVAICIPGFVDL  
KGNVLRVNAISGFVNYPLKERLES LTGVSTEIENDANCV ALAEKFKGNAIDSNNFIATLGTGIGAGIF  
ANGKLLRGNSFMSGEVGFMITGGISNNIPFNCKWESIASVSALRKR VAMRLGKPLKEVSGEFVFDLA  
ENGNIAKNEVDRFFENLSFGIFNLTFILNPEKILIGGGISARPD LIDRIYEKLENLWSLEMAFDNNNNI  
KNLVALEPTKFNNESGKIGALFHYFTCKNQNTSF

>B\_Tenericutes tr|A5JIY9|A5JIY9\_MYCML Glucokinase OS=Mycoplasma mycoides subsp. mycoides LC  
GN=glk PE=4 SV=1

MKKILGIDLGGTSAKVGVISQNGDLEHSFSITNPKTKIENLYFEISKILKTLNVDENDIMLVGITAPGF  
VDHNKGIVVMAPNIENGWFNYDLKTEAEFLFKKPVYVINDVNAAAALGEYRKGSGLVYKSGLFYWL  
GTGIGGAIICDGK LISGSHGFAGEFGHGGSNNHNLKCNCGLN NCIEKVCSATTIPNSLLTILKNKYLEF  
YNKHFLNIKDLDMKLLFEIYNNLNKPIELKNSLLEVYDEL FNHMSLLIHALDPEVVVIGGGGSLAGN  
NLELFLQLGVKNKLTDSYKDIVDFKLALLKNDAGMIGAAFYALEQSLKTN

>B\_Thermotogae\_2 tr|Q9X2G2|Q9X2G2\_THEMA ROK family protein OS=Thermotoga maritima  
GN=TM\_1847 PE=4 SV=1

MTEKVSFRPGVFPLIVIGVPGSVDKTHKKLAFAPNLNRWRDIDVEKYFKVFEVYLENDANLAALAE  
MMRNKHFGRDNIVYILVREGIGGGIIIIEGKLYKGSFNAAGEIGHMKMYDRGPCFCGRVGCWEANT  
SISHCVRQYEKKKPLPGNTMYEFETLCRIYEEDPLAKEVLDEFTGILIDGIVNLVNLISPEIVIVGGEG  
VFLPESVFEVIVSETRRQVHPMDKEVSVEKGSLSNKEVVLEGTSILSSMMISERLV

>B\_ZETA tr|Q0EW16|Q0EW16\_9PROT ROK family protein OS=Mariprofundus ferrooxydans PV-1  
GN=SPV1\_12917 PE=4 SV=1

MRIGIDLGGTKTELIALDKTGAARLRFRRPTPAGDYAATINMIADMVAQAEGESGETANIGIGTPGAIS  
PRTGRMKNCNSTCLNDQPLQQDLELALRRPVRLSNDANCFALSEAIDGAAARSPPVFGVILGTGVG  
GGIVVNGQLLEGVNSIAGEWGHNPLPSANREERPGPPCYCGRKGCJETWLSGPAMRRDHIACGGQD  
ITAAEITRMATEGDAACMLTLERYCERLARALAGVINILDPDAIVLGGGLSNISLLYEQVPRLWSSYIF  
SDSVSTRLLPPAHGDSSGVRGAAWLWGR

>Branchiostoma1 gi|260836485|ref|XP\_002613236.1| hypothetical protein BRAFLDRAFT\_210453  
[Branchiostoma floridae]

MSSPDTKKEHLNFENRQMKVCVATCNRADYSKLAPIMFCLRDDPLMELRVVVMGTHLIDDYGSTY  
RMIQQDGFVVDGYLHTIVRGEDEAAMAESVGLALVKLPDVLVRLKPDLLIVHGDRFDALSLATCAA  
LMNIRILHIEGGEVSGTIDDSIRHSISKLAHYHACCTDRARRRLLSMCEDNDRILLSGCPTYDKLLSCN  
VRNHDNVLARWAQGAQPKDYIVALQHPVTTNIKDSLKMFELMLDAVLDGVTVVLFPNIDAGSK  
EMTRTIRQRGLEHNKNFSLCKHIPYDQFIILMANAGCLIGNSSAGIREAGAFGTPVINLGKRQIGREA  
GANVLHVKDADTKSKILHAINLQYKKQFPRQGSFHSIYGDGHACQRIMKFIHTIKNDLDKPIQKAFI  
FPPMRDVTSLDIDHILEIQSALAVDLGGTNLRVAIVGQQGEILHKMTEPTPGTNEERMDVLMRLLVES  
TSKAVELNCRILGIGISTGGRVNPYDGVVLHSTEILEGWNSIDLRTPISSKLHLPVWVDNDGNCAALG  
EKKFGKGLGSEDFITLIVGTGIGGGIFLNNELVHGANFCAAELGHISVCMDGPDCTCGSSGCVESYAS  
GLALQREAKKLHDADELLVPGVHLTDGEELTAKHLIQAQQLGNKKAQKVVVERACEALGSAICTLLH  
TVNPSHIILCGHLAPHYVDGVREVIQRRALPSAANNIQVMVSDLEEPALLGAASIVLEFATRRIY

>Branchiostoma2 gi|260786105|ref|XP\_002588099.1| hypothetical protein BRAFLDRAFT\_124939  
[Branchiostoma floridae]

MDTEGLNVKNRKMRCVATCNRADYSKLAPVMFALRDDPDMELQVVVMGSHLIDDYGSTYRMIQ  
QDEFVVDGYLHTIVRGEDEASMAESVGLALVKLPDVLVRLKPDLLIVHGDRFDALSLATCAALMNV  
RILHIEGGEVSGTIDDSIRHSITKLSHYHACCTDRARRRLLSMCEDNDHILLAGCPTYDKLLSCNAKN  
YDNVLSKWWGEGVQPKDFIVALQHPVTTDIKGLKMFDMMLDALLEFNVKTLVLPNIDAGSKEMT  
RMIRLRGLEHHPNFSLAKHIPYDQFIILLANTGCLIGNSSAGIREAGAFGTPVINLGNRQIGREAGENV  
LHVRDADTKGKILHAVNLQYQKQFPCSYIYGDGHAVQRIMKFIHKIRNDLEKPIQKSFIFPPMKDVT  
QDIDHILETQSALAVDLGGTNLRVAIISQQGEVLHKMSELTPPTYEQRMDDLVRMLVEATSKAVELSC  
RILGIGISTGGRVNPHEGMVLHSTKILEEWSIDLRTPISSKLHLPVWVDNDGNCAALGEKFGKFKG  
GSEDFITLIVGTGIGGGIVLNNELVHGANFCAAELGHISVSMDGPDCEMCGSSGCVESYASGIALQREA  
KKLHDADELLVPGVHLREGEEVTGKHVIQAQQLGNKKAQKVVETACEALGLAVCTLLHTVNPSHII  
LCGHLAPHYVDGVREVIQRRALPSAANSIQIMVSDLEEPALLGAASIVLEYATRRIY

>Danio tr|Q6P3K2|Q6P3K2\_DANRE Glucosamine (UDP-N-acetyl)-2-epimerase/N-acetylmannosamine  
kinase OS=Danio rerio GN=gne PE=2 SV=1

MERLEKPKKERLRVCVATCNRADYSKLAPIMFGIKSHPDIFDLEVVLGSHLIDDYGNTFRMIEQDD  
FDIGSKLHTIVRGEDEAAMVESVGLALVKLPDVLQRLAPDILLVHGDRFDALALATAAALMNIRILH  
LEGGEVSGTIDDSIRHAISKLAHYHAVCTLSAERHLISMCEDHSRILLAGCPSYDKLLSAYKRDDYAD  
IISWIGDDVKEQDYIVALQHPVTTDIKNSIKIYELMLDALISFNKKTLLIFPNIDAGSKEMVVRMRRK  
GIEQHQNFRVAVKHVPFDQFIQLVAHAVCMIGNSSCGVREAGAFGTPVINLGTRQTGRETGENVLHVR  
DADTHNKIYHALELQFGKRYPCSKIYGDGNAVQRILKFLQTIDLSEPLQKKFCFPPVKECISQDIDHIL  
ETQSALSVDLGGTNLRVGVSMKGVVKKYVQLNPKTFEERIELILTMCKQAMADAVHLNCRILGV  
GVSTGGRVNPQDGVVLHSTKLIKESVDIRTPLSSALHLPVWVDNDGNCAALAERKFGHGKGV  
NFVTIITGTGIGGGIIQHNELIHGNTFCAAELGHIVVSLEGPECMCGGHGCIEAYSSGLALQREAKRLH  
DEDLLVEGMLNNEQVNAIHLINAARLGNSKAETVLHTAGTALGLGIVNLMINPSLVILSGVLA  
VHYETPVRQVIGQRALLTAQGTKVMVSDLEDPALLGAASMVLDTTTRTY

>EU\_Acanthamoeba A new protein sequence entered manually

MDATPTSELVFAGVEAGGTSFSVGLARGSAESIFARANFPTTTPDETIGRVVAWLREQNAKTPFHALG  
IASFGPVDLDRASPTYGYITTTPKPDWGNVDVLSRFSEFNVPTAFETDVNAPAVAHLAQFGQPSCAYI  
TVGTGVGVGIAVEGKPVHGLLHPMGHIFVRMAKGGDFEGTCPFHGACVEGLVASRALAKRFGVE  
RTDLSVDADDREEDHVAAYLAQLCAALVLTVSPHRIVMGGGIMQRPTILPLVHKHVLALLNGYIK  
VPAITESGIGNYITLSPFGGNAGLVGACELARLALPHNASPAM

>EU\_Blastocystis >gi|300123387|emb|CBK24660.2| unnamed protein product [Blastocystis hominis]  
MVLFHTNLRFCITFLFKVSM SDKTKTILQVGGALFATALLGYGKHCFCFENSKKKECERYFVGDILG  
ATNAKAGVVNDEGELLATASQPLTDYTDKGVVSSLVEVAAKAVTEAGLKWSDISEIGVGSPTIDFD  
NGVVIKASNFPDWDHVPANLITEATGVAAVLDNDANAACAAECWIGAGKKGKSNMVMITLGGGIG  
AGVVVNGRVIHGGSGWAGEPGHAIYKVNTPCGCGQKGCFEKTICRSIPTRKPPCEPSRSSLPKRLW  
TLRRPATR

>EU\_Cryptosporidium tr|B6AK73|B6AK73\_CRYMR Putative uncharacterized protein (Fragment)  
OS=Cryptosporidium muris (strain RN66) GN=CMU\_004310 PE=4 SV=1  
MSGERRSSSNGGASARTSRHLFPFRSDRAPASTGIDAAAASPAPYLTLDDANHNQRVVFQEIRTHKR  
VTRSELANITGLTIPTIVNVSRLHLQAGLIVEAKRPARGRGQPAWELELNPDGAFSAGLNIDRDHLTL  
VVLDSLQIRGRVSAEIGFASPDDARRFFARSWRELVTKAHISPDVVGLGIALPDELGTLAFPGKPLT  
YDAWARTDAADLFRDTFAGPTFVENDAVAAAIGEAAQFGHGLEAPSFVYVLISVLLGGGIVIDRTY

>EU\_Dictyostellium tr|Q54TJ9|Q54TJ9\_DICDI Putative uncharacterized protein OS=Dictyostelium  
discoideum GN=DDB\_0204621 PE=4 SV=1  
MIKNEQKFLGVEAGGTSICLSIAINKPSNVIERTSIPTTSVEETKNKVLEWVKNKGGNNIGAIGIASFG  
PIDLDESSETYGYITTTPKPNWGQTNILGWFDYKCPKGFDTDVNGAAISETFHGLHKRGEITSCAYI  
TVGTGVGVGCVVNGSCHIHLVHPEGGHSFCIKQDGDKDFQGTCPFHGNCIEGLVSTGAISKRLGINA  
DKLSEINDDHPVWLIIGNYLAQLCANITCLLSPQVIVLGGGVLNRSILYPIIRTETIKILNGYIKSKYLTN  
DFIDQYIVQSPFASHAGSIGSLELARRALIKNSKDF

>EU\_Ectocarpus gi|298715267|emb|CBJ27916.1| conserved unknown protein [Ectocarpus siliculosus]  
MVIYAGVEGGGTTWRVAIADGHPTNITESKSFVTVQDSKEQLKAIKDWLSTRKYDCLGIGTFGPVDP  
REGSPTYGYITSTPKPGWNMVDVVGYSLSDGSVPCKFDTDVNAPALAEFMWGAKKEGESSCAYITV  
GTGVGVLVNGQAVHGLMHPEAGHLCLKRMPGDDDFPGVDSVFGGASVEGLASTVALAARKNCA  
REDLPGVPDSDPVWEATAHSLAGLCASLVLVVSPERIVLSGGVMNRTLLYDKVRKWTRELLNGYID  
HPAVTTDAVDDYITPSSFGQNAGMVGSLTLAHIAEYEEAGGRGGGAGSPTATKAGGGAACLASPCNV  
SVALAAA VVGLGALAIKASKK

>EU\_Ectocarpus2 >gi|299470076|emb|CBN79253.1| ROK family glucokinase [Ectocarpus siliculosus]  
MYASTEHLMLFVGLDIGGTLNKGVIDGTTGGQLLGRAQERLPADRSPEAVVDGLVALCRGLLDEHG  
ITWDDILYTGVCPCGQIDREAGVVIGASTFPAWHNVPLANLVQDRTGRPVTVLNDASAAAASAFAFR  
GSQETIAVLTGLTGIGLVVCAGRVVTGCRGLVEGGHMIVEPGPNGRLCACGQRCLEMYASASAV

>EU\_Micromonas pusilla tr|C1MJ60|C1MJ60\_MICPS Predicted protein OS=Micromonas pusilla  
CCMP1545 GN=MICPUCDRAFT\_46426 PE=4 SV=1

MSDLDSYSDASHGSPYLTPPPAAREFHRARPRADPSSPGDDYHSARAANSVNESAASTVADDDAG  
VANEWARRVRSFLPTGELERGRKDDVALAENAIAMRPDEPRARFAGVEGGGTTWVCAVAEGDPD  
AIVARAEFPTTTPSETLARVKKWLDARHEEAPFDGLGIATFGPLCLDVASSRYGTITHSPKPGWTRVD  
VLKRLSSGFDCPVAIDTDVNAPAASELADLKRDAIEAADGDFTAADAMQNLAYVTVGTGVGVGIIV  
GGEPVHGLVHPEAGHARVARFPGDGEKGAFAVGVGACPYHEDCVEGMCSAAAVAKRCGVAVSELS  
NVADDDDDAWDATAHYVAGLCANLITTSQQRIVLGGGVLQRRALVSKIRVHVKAQLGGYVKHDMV  
NTRAGLRELIVSSRRGNDAGVVGALTAKGAAEKARGRGGGGGAAAAAARRGNGGRRKGWRA  
HLAHFLVGTVCALVGAKFGVRREERKVDASVGVASAEAAAEEDASEASESDEV

>EU\_Micromonassp tr|C1DZP3|C1DZP3\_9CHLO Predicted protein OS=Micromonas sp. RCC299  
GN=MICPUN\_56468 PE=4 SV=1

MAVPPADDIVPKGPKRLSYTREKTGWGKA AFKLRIFLPGPKERDEDIFEDPDGGSDANGVGS  
PALQPTSSVKSDLGIVPKVKGRFAGVEGGGTTWVVAISEGVPENIVERAEFPTTDDPMVTLGGVRA  
WLDARAAEGRFDAIGIATFGPVDLTKNSPTYGYITHSPKPGWADVDVLGILADGFDCPAGFDTDVN  
APALSELSAMRREMAIDAGAGDGGAEAGAEDSIQNL CYVTVGTGVGVGVCVGGQPVHGLSHPE  
AGHIRVARLPRDGMPEGAFEGGCPYHADCVEGMANASAIARRCGCRVGEELSEVPDDHDAWDA  
AHYLAGLCSVLVMTASPQRIVLGGGVLQRKTLVTKVRAQLKRQLGGYVAHDLVSSKRGLVEFIVSS  
KLGNDAGIVGALAVA EKAKADWEREREGGWGRAGGKRRYGWREHLLHFGIGV FSSLVTLKVVDG  
KITVGKFFV

>EU\_Monosiga tr|A9V8S7|A9V8S7\_MONBE Predicted protein OS=Monosiga brevicollis GN=33963 PE=4 SV=1  
MAMLLLPFWLADRLATLASLVTPPKATVYAAVEGGGTSWRAAIAVGRPDNIVERTTFKTEKPEVTLV  
AIRKWL DARKYDSL GIGTFGPIQPDRSHPQYGCITSTPKPFWKNKVVQTLCPSPGIPHLFDTDVNAPA  
YAEFLALHATNPGLTSLAYITVGTGVGIGLVINGQPVHGLLHPEGGHMLIRRQPGETFAGVCPFHKDC  
VEGLVSAPALAARRGVSQEELANLDDDDFIWDAAADALANACANLLLTVSPQAIVISGGVMLRACL  
FDKVRARTLELLAGYVDVEQLLRPEEVIRPSTWGNNAGIMGALHLSKTALERS

>EU\_Naegleria\_69011  
MSNELIVGIEGGGTSYKVAIGLNIEHAMENVFITETKTVDETMEPIKQFLIKKESELGGIHKRIGIANFG  
PIDVNVGCILPSTPKVSWRSFNIVEYFKREFPQVKHVQFDTDVNGPAMA EYQLVKGSGIKSLAYVTI  
GTGIGVGLVINGSTVSGLMHPEAGHIYTPLHPRDMETGFKGFCTFHTEGCGLEGMAASPSIVKRRNISI  
HDVKSISDDDEIWDIEAHYLAHL CVNLILISSCQVIVMGGGIMNRSILFDKIREKTVQLLNGYHVMIN  
NESIKNIIKPSVYGEHAGIKGALHLSQL

>EU\_Nematostella jgi|Nemve1|241240|estExt\_fgenes1  
MSRYIAGVELGGTSCVAAIAEISNPTTIVHHFEVSTTEYTSTL GALTEYLSAQLKEFNIESYAALG IASF  
GPVDLKPDSKTYGYITSTPKPGWKYVEIVGVFKRTLKEGTPIAFD TDVNAPALAEMAAALNTKTIPI  
LPTVIYITVGTGVGVGVTVEGSPVHGLLHPEGGHIIVPRMQGDEYPGCCAYGHECCVEGMIDSQAIA  
ERVNVHRHDLHTIDDNNPVWVKVVGYYLGALCLNITYLLSPNLIILGGGIMKRRILYTETRHWFKELL  
KEYLDS PQFKTDQGLASYIKEPFHGSKAGIVGALELARHKC

>EU\_Oryza tr|A2XBC4|A2XBC4\_ORYSI Putative uncharacterized protein OS=Oryza sativa subsp. indica  
GN=OsI\_09569 PE=3 SV=1  
MYYGFDIGGTKIALGVFDKDLRLQWETRVPTPRESYDEF LTAIAALVAQADERFGVKGSV GIGIPGM  
PETDDGTYLAANVPAASGKALRADLSARLERDVR LDNDANCFALSEAWDDEF RQYPLVMGLILGTG  
VGGGIVINGK PITGRSYITGEFGHIRLPVDALDIVGREFPLTRCGCGQHGC IENYLSGRGFAWLYEHFY  
HQKLEAPQIITLWEQGDAQAREHVERYLDLLAGRLSRFRKNKRRLRERLRQRIFFRDRMMPEAMDK  
PRVVVLTGAGISAESGIRTFRAADGLWEEHRVEDVATPEGFARDPDLVQAFYNARRRQLQQPEIAPNP  
AHLALAKLEEALGDRFLVTQNI DN LHERAGNKNIIHMHGELLKVRCAWSGQVLDWKEDVLPEDK  
CHCCQFPARLRPHV VWFGE M PLGMDDIYSALAMADV FIAIGTSGHVYPAAGFVHEARLHGAHTVE  
LNLEPSQVGSEFE EKHYGLASAVVPEFVDKLLKGL

>EU\_Ostreococcus tr|A4S0P4|A4S0P4\_OSTLU Predicted protein OS=Ostreococcus lucimarinus (strain  
CCE9901) GN=OSTLU\_32817 PE=4 SV=1  
MKLLGIEGGGTTWIARAIEIDVEGGASVSSASSARGEEHFNKR DGGREQRFETTTP EETLRTIREWIEI  
NAWDADAIGVATFGPLELNPDKDKYGYITTT PKAGWQDVDVLGSLFGKKDATEEEERAWRGRARL  
HTIDQVPLAFETDVNAPAMLEHRALKHELKHVHLVGGESCCYVTVGTGVGVGVV CNGLPVHGML  
HPEAGHMFVKMRAGETFAGT CPFHGNCVEGMVGS GALAKRRGVSA AELASLPDDDDIWEHAAHY  
LAGM CVNLITLAPERIVLGGGVMQRECLFSKIRANVRDILQGYLAVDQIMDDAYLRHFIVPPAWGY  
QTGLTSALYLAERALQRE

>EU\_Ostreococcus\_2 tr|Q014K2|Q014K2\_OSTTA Chromosome 07 contig 1, DNA sequence  
OS=Ostreococcus tauri GN=Ot07g04040 PE=4 SV=1  
MGAVKLLGIEGGGTTWTARATSIDVDAGDSMSATTVSRVTTDVPRECVTEVFNTTTP TETLG AIRAW  
IEVNARDADAIGVATFGPVELNPAKEYGYITTT PKPGWEDVDVLGALFGPRGEEEGGEPWVGKAR  
LKTPNDVPLAFD TDVNAPAALEHRALRRELQNVHRAGGESCCYVTVGTGVGVGVV ANGRPVHGM  
LHPEAGHMHVMMDDDET FPGT CPFHGNCVEGMCGSNALAKRRGVKPADLVTL PDDDEIWDQCAH  
YLAGLCANLITLAPERIVLGGGVMQRECLFSKIRAKTRELLNGYLSVEQITDDDHLRHFIVPPAWGY  
ETGINSALFLAENALKREVA

>EU\_Paramecium tr|A0BMN9|A0BMN9\_PARTE Chromosome undetermined scaffold\_117, whole genome  
shotgun sequence OS=Paramecium tetraurelia GN=GSPATT00030442001 PE=4 SV=1  
MQSKAAALEIGGTFIQVGIGTKTDNKWTLNKKTFDTRDPEDTL LLDLVTYLQQFEFDSIQIASFGPLC  
LNKDDPQFGSITSTPKLKWQNFPIATRLS QALKKPF AIDTDVNACAMA EFM LGNHNV RQSLAYITIG  
TGVGVGHI VNGQCVHGM LHP EGGHILVAKQQEDKDFKGVCAFHGDCLEGLCTNVAIAKRLNCPITE  
LPNISDDHPIWELVGFYLA EACQNILYLLSIEKIVLGGGVMNRKLLYPIIDKHLRRLV NKYVEIPENYI  
VEPQVEDVGLIGALLLQ

>EU\_Phaeodactylum tr|B7G684|B7G684\_PHATR Predicted protein OS=Phaeodactylum tricor nutum CCAP  
1055/1 GN=PHATR DRAFT\_48173 PE=4 SV=1

ASPWPEILARTEIDSSHDHPLVTLRACVDFFEAYKPVGGYHALGIACFGPLGVNVARVEDYGRILATS  
PKAAWRGVDLLTPLATCCRGDTHALVTRVDTDVNAPALAEYYLATQRVKHPGAVAYPVDDAVTSAS  
SEISSIAYVTVGTGVGVGLVHGHQPVHGRMHPEGGHVAVQPLANDVFPGYSWGQKNCPEYEVHTV  
EGLASSVALTERLAQLQQIPTPLSRVSLASLPDDHEVVDHAVNALANLCVTLTLLTSMEEKIVMGGGI  
LRRALLPRIQARTVELLNGYLPLPEDMSTLIATSSFGDDIGLIGAMVLAQSSLQLNEHTRESRKRHE  
TVMKQTAFAKHGLWHGMLVGAVGAALVCKYVWYGPRTK

>EU\_Physcomitrella tr|A9U713|A9U713\_PHYPA Predicted protein (Fragment) OS=Physcomitrella patens  
subsp. patens GN=PHYPADRAFT\_103656 PE=4 SV=1

MSLASGGRSVNRRKKSIVAVLLVLAIVSIWAFYPSGSSEVRSVQAMADFAAVTGSGGDDGGYDAY  
VKAHSAAKRPDQVIRIEGESFTQTDGPGFEVVHPSGETAVLTPESGSISWNVPIEQAGLYNIRIRYLPV  
EGKSSAIERGLTINQQLPFKGADLVTFDRVWGNRDDKIGRDDRGNELRPSQVEKPIWQVESVTDTRSG  
AVYKGVINVSIDIPELIHAPLEAIIRDKHGIEVILENDMNSTVYGFYRKQDYDTEKSIATVFLEGLSLPG  
AGLIVDGHHRGNTRFAGEIAFLPYGISQAEQLRQLHDREAFHSLAAHAVSSLIAMNPETIALTGSLV  
QADDIRLIRQECLKYIPEMHMPQLALLEHPDEDYMYGLTTMTLESLAYSLQLVEKRSKPHPGTVRNI  
LFLLFALPGLSFASWVSRTDPVDRDTLQVSTAGMGMIIFAIAAGSLFGLTSGSIVARKGARFVILISLLI  
VVGFFVAGIGTSLASVPVVIIGLIIFGGGYGTAEVALNVEGSAAEKALNRTLLPAFHGFFSVGTLVGA  
ALGAAAVAIHLQVMVHFTILALIMAAAVLYSWRYLPEESGKEPA

>EU\_Phytophthora sojae |158834|C\_scaffold\_15900001

MPRFAGVEVGGTTWVAIAEDHPENILEKFEVDTTTTPDETGMGAVVAWLKERKFDSIGIASFGPVDLN  
KKSPTYGYITSTPKPNWGNLTDVVGVFVKRAFDPVPIGFDTVDVNAPALYEVAYGGHGDISSAVYITVGT  
GVGVGCTNGSAIHGFMHPEGGHIVPKAPQDVETGFKGVCPFHGDCIEGMVASGSIAARTGVDRR  
ELANITDDDPVWDTIAHYLANLCINVTFITSPDVIVIGGGIARREKLFDLIREKFVARVNKYGQQPPVE

>EU\_Polysphondilium >gi|281205309|gb|EFA79501.1| hypothetical protein PPL\_07552 [Polysphondylium  
pallidum PN500]

MDSNPHVYAGVEAGGTGFTLAIASGTPDNIVDRVSIPTTTTPDETKANVLEWLRGKKFSSIGVASFGPI  
DLDTKSSTFGFITTPKPMWGNLWGFDEFQCPKFDTDVNGAAISETFHGRHERGAISSCAYITV  
GTGVGVGVVANEKPIHGLVHPEGGHIFTKLLEDDQFQGTCPFHGNCIEGLVSTGAISKRLGVTADKL  
SVIPDDDPVWQIVGHYLAELCATITCIMSPOVIVLGGVNLNRTILYPIIRDELLKILNGYIKSEFLTKEN  
VHKYIVQSPFGSNAGIVGALELARRAHLEKN

>EU\_Sordaria macrospora CBI60189.1

MTCDATPWC GTTPAVRRERIEMHSDRIVAGVELGGTKSIAVIGRGREIIDRFRVPTTTTPDETLGAVAAK  
LAWRHHRPAAIGIASFGPISVADGTMLPTPKPHWAGAEIVAPLAQGFDFKVAFHDTDVTGAALGEGA  
FGAAVGLSDFLYVTVGTGVGMGIIAGGRPVTGVMHPEAGHIRVRRRTDDAFAGACPFHGDCL

>EU\_Techamonas AMMSG\_01753

MAEDGRTSQKVVAAVEAGGTTFFVAVFAAPVTSVWDEPLRRAEMATLRDAQATLDGVVAVWISSETV  
AELGEGNDDGCELVGVGVASFGPVDLNKTSASYGFITTPKAGWANTDVVGTFAAAFGVPVAFETD  
VNAAALAERMAAGAGAEPEDVGDAAFVYVTVGTGVGVGVVALDAETAHVHGLLHPEAGHMCVGMH  
PADAAAGIDNLHVC PFHAWCVVEGYVASGGLAARFGVAAADLASVPDDDVGWDAVAWYLAQLVIN  
VTLVLSPHTVVLGGGILKRRSLYARVRSVHTLLNGYLAVPRITDSIEAYLRPPRLAEPGLTGAALLV

>EU\_Tetrahymena tr|Q23CY8|Q23CY8\_TETTH ROK family protein OS=Tetrahymena thermophila SB210  
GN=THERM\_00052020 PE=4 SV=2

MSTELHSNQKLLAFTLGGFLAGAGSLLLFKKLVCPRPNKPSKCPFTGKTKVVTQRIACIELGGTSIRL  
AIGIKETHSDGTQTCFKDQETFKTIETKEPEDNIQQIKEYFENQNIDSVGIASFGPICLDETSEQYGFIT  
TPKVSWKNFPLLKRVSEVIPHRKTQRIGFDTVDNAAACAENFGNHKAKKSLAYITVGTGVGVGLI  
VDGKCVHGLTHPEGGHVLIKPAQGETFQGVCKSHGNCVEGMVTNHAEKLTINELSKIEDSHEI  
WNSVAYYLAQLCLNLTLISSPEVIVIGGGIMNRQPLLGLIKQNFIKLLNQYVDHPRLSSNIDYIVKPF  
FTDGLVGSMMV

>EU\_Thalassiosira tr|B8C6P8|B8C6P8\_THAPS Fructokinase (Fragment) OS=Thalassiosira pseudonana  
GN=THAPSDRAFT\_263374 PE=4 SV=1

AVGIATFGPAGVNKDTANYGRILEGSPKREWRGVDLITPIRQACGLGTAEDDALVGFDTVDVNAPALA  
EFRHRYKPMTSLSYVTIGTGVGVGLIVNSQPIHGLLHPEGGHVSIQPLEGDTFKGYSWGSEKSPEDGS  
SGGDSNQAQAREVLSTLADDHEVWNHASNAIANLCVSILLTSCQKIVLGGGIMKRSILFDKIRHRV  
WVLLNGYLDSSKLADLIVESSWKELGSGLVGAFALALDA

>EU\_Trichomonas tr|A2F1V1|A2F1V1\_TRIVA ROK family protein OS=Trichomonas vaginalis  
GN=TVAG\_442070 PE=4 SV=1



MSANDGKKYACGIELGGQTASIAICEKVGEEIYKKKGIKTCEPMTTPDEAVANIVAAIKESGYAIDRIGIA  
SFGPLDLYKGSIGNTPKPNWGFYPLVKKIQEAFDCKVSMETDVNAPAYSEYLHLKEQDKSIRSVGY  
VTIGTGVGVGVFCDGKPLHGRMHPECGHIMAARVKGDTFEGTCPFHGACFEGLISAQALAKRYGC  
QQGELQIIPSDPVWDIYIEYVAQLVTMSYVYSLDAFIIIGGGIITAKGREWIFDKILARSQQLINNYIH  
TPIISKPFHGADAGLVGACAVAINPDVFAVEE

>EU\_Trichomonas\_2 tr|A2FXV9|A2FXV9\_TRIVA ROK family protein OS=Trichomonas vaginalis  
GN=TVAG\_099490 PE=4 SV=1

MLASLSRNFSGKKYACGIELGGQTAFAICENLGSFLYKKKGIKTREPTTPDEAVEAIVEGIKSSGYEV  
DRIGIASFGPLDVYKGSIGNTPKPKWGNYPVVASIQKEFPEAQVVLETDVNAPAYSEYLHLNSKDNT  
VKSVAATIGTGVGVGVFCDGKPLHGKMHPEGGHHFKPFHLPNDNFKGCCPFHGDCVEGMISAVALS  
KRTGLSLQQLPQIATDDPVWDCFTEYAAQLSANCALLYSLDYMVIGGGIVTAKGREYLIEKIQKRTK  
ELLNGYIHPVKVIKPFYGGDAGLVGATAVALHPDVFTNN

>EU\_Trichomonas2 tr|A2ESX9|A2ESX9\_TRIVA ROK family protein OS=Trichomonas vaginalis  
GN=TVAG\_474430 PE=4 SV=1

MKYLCSGIELGGTSSSAAIIDEDGKYVLKEKGITAENPATLILTLNLRNNSYTCETLGIASFGPLNVES  
GTIGKSPKKGWYFHVKAEFRKYFPDIPIAMETDVNAPAYSEFIEFSKKNSIKSLAYLTIGTGIGLGL  
YSDGSIYHGRLHPEFGHTYIKKLQNDTFSGVCHIHGDCAEGLISASASKRLGISMYEIRDIQNDHPIW  
DLYVEYVSQIVANAALAYS�DVFVIGGGVTTDPKRGFLYDRIYSRASELINDYIPMPLVVRPHFDRDA  
GLIGATVIARRKFNKINANNKLFSQL

>Gallus gi|71895297|ref|NP\_001026603.1| bifunctional UDP-N-acetylglucosamine 2-epimerase/N-  
acetylmannosamine kinase [Gallus gallus]

MEKNGNRRKLRVCVATCNRADYSKLAIPIMFGIKAEPQFFELDVVVLGSHLIDDYGNTYRMIEQDDF  
DIHTRLHTIVRGEDEAAMVESVGLALVKLPDVLNRLKPDIMIVHGDRFDALALATSAALMNIRILHIE  
GGEVSGTIDDSIRHAITKLAHYHVCCTRSAEQHLIAMCEDHDRILLVGCPSTYDKLLSAKNKDYMSVI  
RMWLGEDVKPRDYIVALQHPVTTDIKHSIKMFELTDALISFNKRTLVLFPNVDAGSKEMVRVMRK  
KGIEHHPNFRAVKHVPFDQFIQLVAHAGCMIGNSSCGVREVGAFGTPVINLGTRQTGRETGENVLHV  
RDADTQDKILHALQLQFGKQYPCSKIYGDGNAVPRILKFLKSIDLKEPLQKKFCFPVKDNISQDIDHI  
LETQSALAVDLGGTNLRVAIVSMKGEIVKKYTQLNPKTYEDRLGLILKMCVEAAAEAVNLNCRILGV  
GISTGGRVNPREGIVLHSTKLIQEWSSVDLRTPISDALHLPVWVDNDGNCAALAEKRFHGKGIENF  
VTLITGTGIGGGIIHQELIHGSSFCAAELGHIVVSLDGPCCPGSQGCIEAYASGIALQREAKKLHDE  
DLLLVEGMSMKNEEVVSAAHLIQAACLGNKAESILRTAGTALGLGVVNILHTMNPSSLVILSGVLAS  
HYVNAVKDVIRQALSSVKTVDVVVSNLADPALLGAASLVLDYTTRRIY

>Homo gi|45360235|gb|AAS59258.1| UDP-N-acetylglucosamine-2-epimerase / N-acetylmannosamine  
kinase [Homo sapiens]

MEKNGNRRKLRVCVATCNRADYSKLAIPIMFGIKTEPEFFELDVVVLGSHLIDDYGNTYRMIEQDDF  
DINTRLHTIVRGEDEAAMVESVGLALVKLPDVLNRLKPDIMIVHGDRFDALALATSAALMNIRILHIE  
GGEVSGTIDDSIRHAITKLAHYHVCCTRSAEQHLISMCEDHDRILLAGCPSTYDKLLSAKNKDYMSIIL  
MWLGDDVSKDYIVALQHPVTTDIKHSIKMFELTDALISFNKRTLVLFPNIDAGSKEMVRVMRKKG  
IEHHPNFRAVKHVPFDQFIQLVAHAGCMIGNSSCGVREVGAFGTPVINLGTRQIGRETGENVLHV  
ADTQDKILQALHLQFGKQYPCSKIYGDGNAVPRILKFLKSIDLQEPQKFCFPVKENISQDIDHILE  
TALSALAVDLGGTNLRVAIVSMKGEIVKKYTQFNPKTYEERINLILQMCVEAAAEAVKLNCRILGVGIS  
TGGRVNPREGIVLHSTKLIQEWNSVDLRTPLSDTLHLPVWVDNDGNCAALAEKRFHQGKGLNFVT  
LITGTGIGGGIIHQELIHGSSFCAAELGHLVSLDGPDCSCGSHGCIEAYASGMALQREAKKLHDED  
LLLVEGMSVPKDEAVGALHLIQAACLGNKAQSIILRTAGTALGLGVVNILHTMNPSSLVILSGVLASH  
YIHIVKDVIRQALSSVQDQDQDVVVSDLVDPALLGAASMLVDYTTRRIY

>Mus gi|4456673|emb|CAB36908.1| UDP-N-acetylglucosamine 2-epimerase/N-acylmannosamine  
kinase [Mus musculus]

MEKNGNRRKLRVCVATCNRADYSKLA PIMFGIKTEPAFFELD VVVVLGSHLIDDY GNTYRMIEQDDF  
DINTRLHTIVRGEDEAAMVESVGLALVKLPDVLNRLKPDIMIVHGDRFDALALATSAALMNIRILHIE  
GGEVSGTIDDSIRHAITKLAHYHVCCTRSAEQHLISM CEDHDRILLAGCPSYDKLLSAKNKDYMSIIR  
MWLGDDVKCKDYIVALQHPVTTDIKHSIKMFELTLDALISFNKRTLVLFPNIDAGSKEMVRVMRKK  
GIEHHPNFRAVKHVPFDQFIQLVAHAGCMIGNSSCGVREVGAFGTPVINLGT RQIGRETGENVLHVR  
DADTQDKILQALHLQFGKQYPCSKIYGDGNAVPRILKFLKSIDLQEPLQKKFCFPPVKENISQDIDHIL  
ETLSALAVDLGGTNLRVAIVSMKGEIVKKYTQFNPKTYEERISLILQMCVEAAAEAVKLNCRILGVGI  
STGGRVNPQEGVVLHSTKLIQEWNSVDLRTPLSDLHLPVWVDNDGNCAAMAERKFGQKGQENF  
VTLITGTGIGGGIIHQHELIHGSSFCAADVGHVSLDGPDCSCGSHGCIEAYASGMALQREAKKLHD  
EDLLLVEGMSVPKDEAVVALHLIQA AKLGNVKAQSILRTAGTALGLGVVNILHTMNP SLVILSGVLA  
SHYIHIVKDVIRQQALSSVQD VDVVSDLVDPALLGAAS MVLDYTTTRRH

>Paracentrotus1 GLEAN3\_05241

MYSLMVDALMEFNKRVMILFPNIDAGSKDIVRIMRQKGVETNPMFYPVKHIPFEFII LVANAGCMI  
GNSSAGVREAGAFGTPV VNLGSRQTGRETGENVLHCRDADTTQKIHHALEIQYQRQFP PPSYIYGDG  
HAVPRIIKFLKSIKQEDTIQKQFIFPPMPESP SIDIDHILETQSALAVDMGGTQLRVALIAADGEIKLRRS  
RPTPHTNNEERMKALLELLEATKESYALNCRVLGVGISTGGRVNSKEGLVMHSTKAIAGWDEIDLR  
TPIETTLHLPVWVDNDGNCAALGERKFGHG RGVKDFITATGTGIGGGIVLDKRLIHGTNFCAAELG  
HIKVS LDGPACQCGSHGCVEAYSSGMALKREAMKLHEAGELLVDGMIVEK GEEVTAKHLVQAAKT  
GNQKAKKILDTGAQALGTAITSLLHVLNPKLVILCGVLSVYLEP VREAVKAHSLPSAVSEVEIVSSQ  
LVEPALLGAASLVLEYATRRTY

>Patiria\_translation\_frame\_3 HP128996.1

RLIHGTD FCAAELGHTKVSLEGPPCQCGGTGCVEAYSSGLALQKEAQR LHEEGNLLTEGDHLENNE  
KITAKHLVEAARLGNQKAQDIMDRGAKAVASVVVNLHILNPSRVVLCGVLAPAYIETVRNIVKKEA  
LPSAAHAEI

>Saccoglossus2 XR\_086474.2 PREDICTED: Saccoglossus kowalevskii UDP-N-acetylglucosamine-2-epimerase/N-acetylmannosamine kinase-like (LOC100367162), miscRNA

QRCRDGVIGISIPDFGRSTPQFMDGKKDPHDVFM YQNGFQNGHRRT PSSSSLGSESLDRPMRVCVAT  
CNRADYSKLA PIMLGLKEDKDFQLQVIVMGCHLIDDY GSTYRMIEQDKIKIDAKLHTIVRGEDEAA  
MVESVGLALVKLPDIFLRLKPDILIVHGDRFDALSTATAAALMNIRIIHIEGGEISGTIDDCIRHSITKLA  
HYHVCCTERARGRLQAMCEDNERILLAGCTSYDMLLKSNTKNCQLIIDRWVEKGVKPKKEYI IALQH  
PVTTDLHNSLKMFDLTLEALLEFGKKT VLLFPNIDAGSKDMTRILRRKKIENHPNFSTAKHIPFEFIV  
LVANCACIIGNSSAGVREAGAFGTPVINLGSRQTGRETGENVMHCRDADTKEKILHALELQYQKQY  
PPSYIYGDGHAVSRIIKFMKELDVIDSIQKQFIFPPMPDGV SQDIDHILEIQSAIAVDLGGTNLRVSIVSK  
AGEIMHMMSKPTPSDNTARMESLTLVDASQIATKLNCRVLGVGVSTGGRVNPHEGLVMHSTKSL  
EGWSAIDLRTPISSALHLPVWVDNDGNCAALGERKFGHGK GKEDFLAIATGTGIGGGVLVNLGRLVH  
GSNFCAAELGHIAVSIDGPACMCGSSGCVEAYSSGLALMREAKKLHQAGELIVDGMKMT?  
NEIISAKHLIQA AKLGNKKA EKIIHLGGEALGTAVISILHLLNPTLVVLCGVLAPTYVDIVRETIENKAL  
PSARGVKVQV SLLKEPALMGAASLVLEYATRRIY

>Strongylocentrotus1 gi|115637356|ref|XP\_795233.2| PREDICTED: similar to UDP-N-acetylglucosamine-2-epimerase/N-acetylmannosamine kinase [Strongylocentrotus purpuratus]

MVEIAFNRF LNQQHQ RKLSGTMTSLNGSGVKANCGGDM DTKRKFRCVATTNRADYSKLG NIMQ  
AIKDDEMLELSTIVLGCHLIDDY GSTYRLIEKDGFTID SRLHTIVRGEDEAAMVESVGLAMVKLPDI  
MLRLKPDVVIVHGDRFDVLSLAACAALMNIRIVHVEGGEVSGTIDDSIRHTISKLAHYHVCCTERAH  
KRLLAMCEDNDRILLAGCPSYDKLLSTDV VDCQHILNRWLK GEGKSKEYIVALQHPVTTNIADSLK  
MYSLMVDALMEFNKRVMILFPNIDAGSKDIVRIMRQKGVETNPMFYPVKHIPFEFII LVANAGCMI  
GNSSAGVREAGAFGTPV VNLGSRQTGRETGENVLHCRDADTTQKIHHALEIQYQRQFP PPSYIYGDG  
HAVPRIIKFLKSIKQEDTIQKQFIFPPMPESP SIDIDHILETQSALAVDMGGTQLRVALIAADGEIKLRRS  
RPTPHTTNEDRMKALLELLEATKESYALNCRVLGVGISTGGRVNSKEGLVMHSTKAIAGWDEIDLR  
TPIETTLHLPVWVDNDGNCAALGERKFGHG RGVKDFITATGTGIGGGIVLDKRLIHGTNFCAAELG  
HIKVS LDGPACQCGSHGCVEAYSSGMALKREAMKLHEAGELLVDGMIVEK GEEVTAKHLVQAAKT  
GNQKAKKILDTGAQALGTAITSLLHVLNPKLVILCGVLSNVYLEP VREAVKTHSLPSAVSEVEIVSSQ  
LVEPALLGAASLVLEYATRRTY

>Symsagittifera JF826132

MKIAVATCNRADYSKLAPVLRGLKQDTTFQVSIVVMGSHLIDYDGYNTYRFIERDGNQIDSMLHTLVR  
GETEGAMVESMGLAMIKLPDILNRLQPDIVMVHGDREFDAMSAVAIAVMNVRVLHLEGGEVSGTID  
DVIRHSITKLAHYHICCTKGARLRISMCESSRVLLAGCPAYDELIHTDVSKYHEAFERWLPNHVGT  
KNFIICVYHPVTTAIAESIHFGLLLDALVHFDVRTVILFPNVDAGSKELVRCIRLRNLENHEKISCYK  
HVPFSEFVYLMGNCGLMIGNSSAGIRESNVFGTAVINIGTRQRGRQSGANVVHVKNPTS AEDLLWHI  
RSQFGKVYPRDYIYGDGRAVERIVKFIKEIDCDSPVEKSFNFDNRSSGLRAPSKASFGAEFPLSRQAH  
SLQLALAVDLGGSFIRVALVDDRGNIERMRRTEMVDCPDERIAIIVRMANDLLENKRDLVVGVGST  
GGRVNSETGEILFATKVLVSGWGGVALKTRLQEQGLPCYVENDGNCAALAEVHFGSHKMEDMVVL  
HFGTGIGGGIHDGCLLNGSSYSAGEFGHIVVCFDDGPDCCMCGNSGCVEAYAGGWALNKLAKEMEL  
SSNWRKEGADDQKPVTPGQPNKPTYLTDLASDGVYAVQHINRAVRAVASALLTIYSSYNPPVAILA  
GPLAPVYFDGVKNKLEERSAILGRNFTLLQSDMTEMSLKGAATLVLNNSRAVPQNAIV\*

>Takifugu tr|Q4W392|Q4W392\_TAKRU Putative UDP-N-acetylglucosamine 2-epimerase/N-  
acetylmannosamine kinase (Fragment) OS=Takifugu rubripes GN=glcne PE=2 SV=1

MFGLKSHPEFELEVVLGSHLIDYDGYNTFRMIEQDDFDIGSKLHTIVRGEDEAAMVESVGLALVKL  
PDVIQRLHPDILVHGDREFDALALATAAALMNIRILHVEGGEVSGTIDDSIRHAISKLAHYHACCTRM  
AEQHILIAMCEDHSRILLAGCPSYDKLLLSHQKEDYMDIISWLGDNVKEHDYIVALQHPVTTDIKNS  
IKIYGLMLDALLSFNKTTLILFPNIDAGSKEMVVRMRKKGIEQHPNFRAVKHIPFEQFIQLVNHAGCM  
IGNSSCGVREAGAFGTPVINLGTGTGRETGENVLHVRDADTHNKIYHALELQFGKRYPCSKIYGDG  
NAVPRILKFLSSIDLDEPLQKTFCFPPVKDPISQDIDHILETQSALAVDLGGTNLRVAIICMRGNIVRKY  
TQANPKTFEARMQLILKMCSDAMRDAVFLNCRILGVGVSTGGRVNPQEGVVLHSTKLIQEWSAVDL  
RTPISDALHLPVWVDNDGNCAALAEKKFGHGKGVENFVTVITGTGIGGGIHHQNELVHGSTFCAAEL  
GHIMVSFDGPECSCGSRGCIESIASGMALQREAKRLHDEDLLKVDGLDMKISDPITAAHLINAARLG  
NSKANIVLNKASTALGMGIINILHIMNPSLVILSGVLGSYYQAPVQRTIMERALFSAQSVKVVISDLEE  
PALLGAASMVL DYATRRIY

>Tetraodon tr|Q4RJ92|Q4RJ92\_TETNG Chromosome 18 SCAF15038, whole genome shotgun sequence  
OS=Tetraodon nigroviridis GN=GSTENG00033530001 PE=4 SV=1

MTRVGSAAAPAAPRAAGQSQSPAPPVQSSPSPCRIAMTTPPSASFSPFFSNATGFCKLRTLMNAGIKTE  
LYSWRMQRGRVKMDRRRMEDQNQCRKKLRVCVATCNRADYSKLAPIMFGLKSHPEFELEVVL  
GSHLIDYDGYNTFRMIEQDDFDIGSKLHTIVRGEDEAAMVESVGLALVKL PDVLQRLQPDILLVHGD  
FDALALATAAALMNIRILHLEGGEVRSVTIDDSIRHAISKLAHYHACCTRMAEQHILIAMCEDHTRILL  
AGCPSYDKLLLSHHKEDYMDIISWLGDKVKDHDYIVALQHPVTTDIKNSIKIYGLMLDALLSFNK  
TLILFPNIDAGSKEMVVRMRKKGIEQHPNFRAVKHIPFEQFIQLVCHAGCMIGNSSCGVREAGAYGTP  
VINLGTGTGRETGENVLHVRDADTHNKIYHALELQFGKRYPCSKIYGDGNAVPRILKFLRSIDLEEP  
LQKTFCFPPVKDPISQDIDHILETQSALAVDLGGTNLRVAIICMRGKIVKKYTQANPKTFEARMQLILK  
MCSDAVRDAVFLNCRVLGVGVSTGGRVNPQEGVVLHSTKLIQEWSSVDLRTPISSDALLLPVWVDND  
GNCAALAEKKFGHGKGVENFVTVITGTGIGGGIHHQNELVHGSTFCAAELGHIMVSFDGPECSCGSR  
GCIESYASGMALQREAKRLHDEDLLKVDGMDLKISEPITAAHLINAARLGNSKANIVLNKASTALGM  
GIINILHTVNPSLVILSGVLGSYYQAPVQRIISERALFSAHSIKVVTS DLEEPALLGAASMVL DYATRRT  
Y

>Xenopus gi|118404390|ref|NP\_001072728.1| glucosamine (UDP-N-acetyl)-2-epimerase/N-  
acetylmannosamine kinase [Xenopus (Silurana) tropicalis]

MEKNINQRKLRVCVATCNRADYSKLAPIMFGIKAEPDRFVLSVVVIGSHLIDYDGYNTYRMIEQDDFD  
IQARLHTIVRGEDEASMVESVGLALVKL PDVLNRLNPDIIIVHGDREFDALALATS AALMNIRILHIEG  
GEVSGTIDDSIRHSITKLAHYHACCTRS AEQHILIAMCEDHDRILLAGCPSYDKLLSVNNDYMSVIK  
MWLGDDAKSGEYIVALQHPVTTDIKHSIKMFEFTLDALLSFNKKTLILFPNIDAGSKEMVVRMRK  
GVEHHPNFRAVKHVPFEQFIQLVAHAGCMIGNSSCGVREAGAFGTPVINLGTGTGRETGENVLHV  
RDADTQNKIIHALQLQFGKRYPCSKIYGDGNAVPRIVKFLKSISLDEPLQKFCFPVKESISQDIDHIL  
ETLSALAVDLGGTNLRIGIVSMTGEIHKYVQPNPKTYEDRIELILKMCVEAASEAVKLNCRILGVGIS  
TGGRVNPREGVVLHSTKLIQEWSSVDLRTPLSDTLHLPVWVDNDGNCAALAEKFGQGGKIEDFVT  
VITGTGIGGGVIHNLHVLHGSSFCAGELGHIMVSFDGPDCCMCGSRGCVEAYASGIALQREAKKLHDE  
DMLLVEGMSVKNDESVAVHLIQA AKFGNTKASNILKTAGTALGIGVINILHTINPSLVILSGVLANQ  
YVNVVKDVIRQRGLASIQNVVVSSLS DPALLGAASMVL DYTTTRTY

>XENOTURBELLA EC906593.1

LHEQGD LFDVDMKLPNENEEVTSETLVYAARAGNKKAEAVLDRGAKALSAAILTLLHTVNPSLIIT  
GVLGPVYIDKVQDTIKKAALPAAQQVDIKVSKLKEPALLGAASIALDFMTRR

## cytidil sequences

>A\_sp|Q58463|Y1063\_METJA Uncharacterized protein MJ1063 OS=Methanocaldococcus jannaschii  
GN=MJ1063 PE=4 SV=1

MKIIGIIQARTGSKRLKNKVLLKLGDRCCILEILLERLKKSKKLLDDIIVATTIKKEDNAIVELCNLSLGVNV  
FRGSEKDVLDRLFYNASKFYSGDVIVRITGDNPLTSIELIDKQVEYLLKNNFDYVSTKNIILGLSSEVFT  
FDALAKAWKNAKEYQREHVTPYIYENPNLKFVYLEPPEYKREGIRLTIDTIKDFKLYLELQKHFD  
LINVDIRQIIDFLDKNPQIKNINSNVRQKSYREVEE

>A\_\_2 tr|Q6KZH4|Q6KZH4\_PICTO Molybdopterin-guanine dinucleotide biosynthesis protein A  
OS=Picrophilus torridus (strain ATCC 700027 / DSM 9790 / JCM 10055 / NBRC 100828) GN=PTO1293  
PE=4 SV=1

MISIIFAKKSERFPGKHHAMICGEEMIKRISRIINESMLFDKIILYTKDETLYSEYCDIVIDKSKGTLIDSL  
MSCLKEYSEFLAVGGDMPLLDYNILKYLMDNYTGRSLAVSSYGFIQPLLSIYNKSIINDLDKYILSGS  
KSIYKFIMKSNFKILNINTFKTMSVNTLNDLKEINYYLGC

>A\_\_3 tr|Q8ZW75|Q8ZW75\_PYRAE Conserved protein OS=Pyrobaculum aerophilum GN=PAE1934 PE=4  
SV=1

MAPLEVKCAGVVLAAGGSARFGSQKLLANFKGRPLVWHAETLRSAGLETYIVVNSREVASAAGR  
VDGIIYNPWWRQGLSTSLKAALIALYQKKCIVWMPGDMPCVKPDTVLKIASACKSGLAVPVYRGAR  
GNPVASCRDVYALALGITGDVGLRVLLNAVPTLSLEVEDAGVLADVDFPGDLQRLPC

>A\_\_4 tr|Q465W2|Q465W2\_METBF Putative nucleotidyltransferase OS=Methanosarcina barkeri (strain  
Fusaro / DSM 804) GN=Mbar\_A3457 PE=4 SV=1

MDAIVMAGGFGQRLGMGEKPCVELLGKPLIAYVIDTLRASENIDRVFVAVSPVTPRTEIMIQUERYKGE  
VRVIRTFGGNYVGDMIHAVETAETVGPVMIIMSDPLINSELIDSVIEKYKEEGKPALSVPINVCCKG  
AGIRPDTVFNKDGKLVIPAGINILDSSQIRKEQEDFNLILDNPKLAINVNTVEDLQHCKEMLQGQD

>A\_\_5 tr|A9A1S8|A9A1S8\_NITMS Acylneuraminate cytidyltransferase OS=Nitrosopumilus maritimus  
(strain SCM1) GN=Nmar\_0149 PE=4 SV=1

MNSAAIVSVRNSSTRLPNKAIMEIKNNFTSIDVVIQRAKKTLPVHIATSTSKEDDIFEDIAKKNDVEIF  
RGPLINKIKRWYECFNKFGIYQYALLVDGDDLSYSYDIGKRAISELKNKSVDMITHPKDIVTGFFTSAIN  
EKGIKKLFVAPTDEINTDVITRYIEKANLTTDIVPLKDFEKNENVRFTLDYKEDLEFFKLYENLDIL  
SSGKEILDFLNNKHLIQINFHKQKEFLDNQAKFNESVK

>A\_\_6 tr|A9A1R4|A9A1R4\_NITMS Acylneuraminate cytidyltransferase OS=Nitrosopumilus maritimus  
(strain SCM1) GN=Nmar\_0135 PE=4 SV=1

MKFCNVGIIIQARTGSDRFPKVLASIEKKPMIWHIVNRCKKVKNIDKILATTTLKEDYPLISLAKKN  
KIEYFRGSKNDVLDRLFYQCSTSNLDDIIRITGDCPLVDPKLDQFLDFFSHKKYDYVSNTINPTYPDG  
LDIEIFSFKALKKAWNMSKKKSNREHVTTFIKHHPEKFKIKNFENNTNLSNYRLTVDHKNDLKLIRKI  
YKEFRPNIKFSTKSVISLLNKNPELKFQINQISRNEGYEKSLLDN

>B\_Blast gi|149174391|ref|ZP\_01853018.1| CMP-N-acetylneuraminic acid synthetase [Planctomyces maris  
DSM 8797]

MAGAIGLITARGGSKGVPRKNIKVLAGKPLIAWTIEAALQSQELERVIVSTDDKEIASISRQYGAEVPF  
LRPLKLSLDGSSHADVVHLAIDWLIEHEQEYSEYITMLQPTSPFRIADDIDGSIRFAREKNAKAVIGM  
MEAPSHPVCLRLMTEAGLLVELTPQQEESALRRQLPEVYAFNGALYVLRTEEFKTKTFRPQGETY  
GYKMPAERSWEIDTEWEFLVASLLMENQVSQTATRTAA

>B\_Blast\_2 gi|218886935|ref|YP\_002436256.1| acylneuraminate cytidyltransferase [Desulfovibrio  
vulgaris str. 'Miyazaki F']

MPTPAPHSAAETAGPILGLITARGGSKRIPGKNLRIAGGKPLLAWTIEAALQSRLLSRVVLSTDDPQIAA  
AGRLYGAEVPFLRPAELATDTSAHILCVLDALDRLRDMDGFAPTAVCLLQPTSPLRQACDIDALLSEA  
AATRPPAMVSVNACTEHPYFARSVSATGELMPFVQNLAYAREQDLEPACFINGAIYYNTVESLRKH  
KTFYPEGLRGHLMRERSLQVDEPFDLHLADLLSNPMPSTARSTGCENS

>B\_Blast\_3 gi|295401162|ref|ZP\_06811135.1| acylneuraminate cytidyltransferase [Geobacillus  
thermoglucosidasius C56-YS93]

MINGKKILAIIPARGGSKGIPKKNIKPLRGKPLIAWTIEEAKKSKLLDKIIVSTDDEEIMNVAKKWGAE  
VPFLRPSELARDDTPGIAPVLHLEYFSDYEVVVLLQPTSPLRLAEDIDEAIYLCEKNKSNFCVSVTE  
SKIIPDWMFRINNQGMLEPLNSNREIPYQRQKAKKTYVLNGAVYVGRKEALIKTRSFLTPELTPYIMP  
NIRSVDIDDMDDFLYCEYLGRNE

>B\_Blast\_4 gi|88810764|ref|ZP\_01126021.1| acylneuraminate cytidylyltransferase [*Nitrococcus mobilis*  
Nb-231]

MNDVPRILGIIPARGGSKGVPRKNVRCVAGKPLIGYTIEAAQASRLSRVVVSTEDAEISAVARACGV  
EVLPRPVDLAADDTPGIAPVLHAMEQMSEYDYVVLLQPTSPLRTALDIDAAIETCMSAQAPACVSVS  
EAAQSPYWMFRIEAGGKMQLLSASADEYSRRQNVPPAYALNGAVYVAVTDWLRERQTFLTSETVA  
YTMPQERSLDIDSEWDFLIFGLVLEKKP

>B\_Blast\_5 gi|261855251|ref|YP\_003262534.1| N-acylneuraminate cytidylyltransferase [*Halothiobacillus*  
*neapolitanus* c2]

MSDIGSVLALIPARGGSKGLPGKNIRPLKGRPLIGWSIEAARTSRVVSRRVVSSDDEEILAVARDQGAE  
TPFRRPASLAGDATPSMDVVLHALDQLAEFEWVVLLQPTSPLRLSADIDAAIEQCLKTNPACVSVS  
EAPASPWWMFVGAECRMRSLPAEQRPVRRQDLPLDYALNGAVYVAKTEWLRTSRSLTEETVAY  
VMPPARSVDIDTLFDFQLAECLLGNH

>B\_Blast\_6 gi|168334400|ref|ZP\_02692579.1| CMP-N-acetylneuraminic acid synthetase [*Epulopiscium* sp.  
'N.t. morphotype B']

MEILGIIPARGGSKGLPGKNIKMLGDKPLIAYTIAAAINSKHITRTIVSTDDAAIAEVALKFGAEVPM  
RPECLATDTATSAEVVLHLLKTLEGNGYMPDFICLLQCTSPFRTAADVDSIEKCLNTGFDACYSVTE  
ARSNPYWMKVFEGNQLNSFIDAEMILRRQDLPTVYELNGAIYFAKTEEVIKNKSLLHLANATGYVMPI  
QKSVDIDTALEFELAKMLMNNI

>B\_Blast\_7 gi|253997845|ref|YP\_003049908.1| acylneuraminate cytidylyltransferase [*Methylovorus* sp.  
SIP3-4]

MSRNNEIVCIIPARGGSKGIPGKNLVSLGGKPLLAWSIEAALKSKVLGRVIVSTDSEEIAKVAQQWGA  
EVPCIRPNELANDDIHAIHVVLHMLEWLKKEEAYVPAGAMMLLPTSPLRRASDIQGAVKFLDKKA  
SSVVSVDLKGKYMNTNRYLDGDQLVRVAPEENPNAQRQGLKKLHVSNGSIFLARPDILEQSGTFHV  
DDALGFVMDNMHSIDINAPEDLNLARKFCEVFEPWKSDE

>B\_Blast\_8 gi|281411850|ref|YP\_003345929.1| acylneuraminate cytidylyltransferase [*Thermotoga*  
*naphthophila* RKU-10]

MKIVGIIPARRGSKGIRNKNIVNLCGKPLIYYTIKEALKSKVIDKLIVSTDSEKIAKLAKSFGAEVPIR  
PKELATDDAKGIDVILHAMNWFESRGEIFDAVLVLQPTSPLRSHEDIKAVEVFLEKKANAVVSVCEV  
EHHPLWANVLPDDKSMDFIRKEIRNKNRQELPKYYRLNGAIYLARWNYLKNYKDWFFHHKCYALI  
MPQERSVDIDSEVDLAVA EYFLKKWGRCYED

>B\_sp|O66914|KDSB\_AQUAE 3-deoxy-manno-octulosonate cytidylyltransferase OS=*Aquifex aeolicus*  
GN=kdsB PE=3 SV=1

MRAVVIIPARLGSTRLKEKPLKNLLGKPLIRWVVEGLVKTGERVILATDSERVKEVVEDLCEVFLTPS  
DLPSGSDRVLYVVRDLVDLIINYQGDEPFVYEEDIKLIIFRELEKGERVVTLARKDKEAYERPEDVK  
VVDREGYALYFSRSPYFRKNDTFYPLKHVGIYGRKETLMFEGAMPPSKLEQIEGLEQLRLLENG  
IKIKVLITENYYHGVDTTEEDLKIVEEKLKNL

>B\_\_2 sp|Q6G4U6|KDSB\_BARHE 3-deoxy-manno-octulosonate cytidylyltransferase OS=*Bartonella*  
*henselae* GN=kdsB PE=3 SV=1

MALEPIILIPARIGSTRLPQKALAEIAGKPMIVHVAEQAKKAAFGRIVATDHNNIAKVVTAYGHECIIT  
CRDHKSGSDRIYEALHIDPERRYNVILNVQGDLPITPHEIISALRPLENSLTDIATLGAKIVEENEKT  
DPNIVKIIIGTPLSHNRFRALYFTRATAPYGDGPLYHHIGIYAYRREALKFFVALKPSPLEQREKLEQLR  
ALEHNMRIDVEIVDTIPLGVDTQRDLERVRKILA

>B\_\_3 sp|Q2YPQ5|KDSB\_BRUA2 3-deoxy-manno-octulosonate cytidylyltransferase OS=*Brucella abortus*  
(strain 2308) GN=kdsB PE=3 SV=1

MLQTMKTLTLIPARLGSTRLPNKPLADICGKPMIVHVADRAAAAKLGRVVIATDSEEIFKVVAAHGH  
EAIMTRGDHESGSDRIYEALAKLDPSGEIDAVVNVQGDLPITDPDITRRALLPLEDGPDIATLGVEIT  
VEEEKTNPNVVKIVGSPLAGNRRLRALYFTRATAPYGEPLYHHIGLYAYRRSALERFVKLGPSPLEK  
REKLEQLRALEAGMRIDVEIVKTVPLGVDTQADLDRARTFCSQAGTI

>B\_\_4 sp|Q3ATT2|KDSB\_CHLCH 3-deoxy-manno-octulosonate cytidylyltransferase OS=*Chlorobium*  
*chlorochromatii* (strain CaD3) GN=kdsB PE=3 SV=1

MNAIIIIIPARLGSTRLPEKMLADIEGEPLIVRTWRQAMQCCRASRVVATDSVKIAEVLTTYGAEVVM  
TSPEARCGSERIAEAARQFACDVVVNLQGDEPLISHETIDLALPFFSPNPPDCSTLVFPLQPDDWAQL  
HDPNQVKVVLNREGYALYFSRSPFPQRNQLTSTQCYRHVGLYAFKAEVLQCFAALPPTMLEEAESL  
EQLRLEHGYRIRCMVTHDDQPGVNTAEDLELVRTLFLKQRHQEA

>B\_\_5 sp|P0CD75|KDSB\_CHLTR 3-deoxy-manno-octulosonate cytidyltransferase OS=Chlamydia  
trachomatis GN=kdsB PE=3 SV=1

MFAFLTSTKKGILPSRWGSSRFPKPLAKILGKTLVQRSYENALSSQSLDCVVVATDDQRIFDHVVEF  
GGLCVMTSTSCANGTERVEEVSRHFPQAEIVVNIQGDEPCLSPVIDGLVSTLENPAADMVTSVT  
ETTDPEAILTDHKVKCVFDKNGKALYFSRSAIPHNFKHPTPIYLHIGVYAFRKAFLSEYVKIPSSLSL  
AEDLEQLRVLEIGRSIYVHVQVQATGPSVDYPEDITKVEQYLLCLSKASF

>B\_\_6 sp|O25016|KDSB\_HELPHY 3-deoxy-manno-octulosonate cytidyltransferase OS=Helicobacter  
pylori GN=kdsB PE=3 SV=1

MIIIPARLKSSRFENKVLEDIFGLPMVVRCAKNANLVDECVVACDDESIMQTCQKFHIKAVLTSKHHN  
SGTERCLEAARILGLKNDERVLNLQGDEPFLEKEVILALLEATKNAPFMATCAKVIDEEQAKSPNLV  
KVVLD SQNNALYFSRSLIPFLRDFDAKRQTPLLGHIGIYGPHNKEILEELCALKPCVLEEIEKLEQLRA  
LYYQKKIAVKIVQSESVGIDTQEDLQNALKIFSPDLLER

>B\_\_7 sp|Q5ZU88|KDSB\_LEGPH 3-deoxy-manno-octulosonate cytidyltransferase OS=Legionella  
pneumophila subsp. pneumophila (strain Philadelphia 1 / ATCC 33152 / DSM 7513) GN=kdsB PE=3 SV=1

MSHNFHVIIIPARYHSSRFPKLLQEINGITVIERVYRQALLAEPKSVIIATDHDEIADRAIQFGAEVVITS  
HTHQGTGDRIAEVIKGSFAPDDVIVNVQGDEPFIRPKLIQVACSLTKTKAPVSTLCWPISSEILNN  
PNVVKVCTRDNHALYFSRSAIPFHRDDKNAYSNTFRHIGLYAYRAAFLLEFVSWPPCTLEQIECLEQ  
LRILWSGFSIRVDEACEEPLQDINTKEDLILAQQYFLDTFNV

>B\_\_8 sp|Q8F0C3|KDSB\_LEPIN 3-deoxy-manno-octulosonate cytidyltransferase OS=Leptospira  
interrogans GN=kdsB PE=3 SV=2

MKKILGVIPARYASSRFPKPLAKIGDKTMIEWTYRNASRSSVLSLVVATDDVRIHEVVQKFGGRSV  
MTSSDHPSTDRIEVANQFSEYSIIVNIQGDEPGIEPELIDGVASLKASHPPEWAMSTAAVPLDFSHAI  
DFNRVKVIIDRNGKAIYFSRSLIPSQFKTTVPLYRHLGIYGYDRDFLLQYNSLPKSNLEESSELEQLRAI  
EAGYGIGIYLSKEAGLSVDTPADLEIVIEDFKKRKWISE

>B\_\_9 sp|Q2VZK3|KDSB\_MAGSA 3-deoxy-manno-octulosonate cytidyltransferase  
OS=Magnetospirillum magneticum (strain AMB-1 / ATCC 700264) GN=kdsB PE=3 SV=1

MAELTPIIIPARMQATRLPGKPLADIHGPEMIIHVWRRSVQAGLGPVVACSEAEVFDVAVHAHGGQ  
AVMTDPDHPGSDRVWEAVRKLDPGRFDIVNVQGDLPDTPQIIRAVFAPLAEPGVVATLVTEIT  
NEEERTNPVVKAVVGLRPGQVRGALYFSRATVPANAGPHYHHIGLYAYRRDSLRFVSLPQGVLE  
SREKLEQLRALENGMRIDCALVDTVPLGVDTPADLERARALLKA

>B\_\_10 sp|Q1DDB3|KDSB\_MYXXD 3-deoxy-manno-octulosonate cytidyltransferase OS=Myxococcus  
xanthus (strain DK 1622) GN=kdsB PE=3 SV=1

MQSCRTVAVIPARHASTRFPKPLAIIAGRTMIEHVWRRSQEAQAFDEVVWVATDDDRIRAAVEGFGG  
KAVMTSPACATGTRVAEVALGRPDIDIWVNVQGDPLVDPATLQRLAGLFQDASVRMGTIVRPLEA  
DEAASPHVVKAVLALNGDALYFSRSLVPHVREPGTPVQRWGHIGLYGYRREVLLSLAKLAPTPLED  
AEKLEQLRALEHGIPIRCAKVTSHTVAVDLPGDVEKVEALMRARGG

>B\_\_11 sp|Q1QR80|KDSB\_NITHX 3-deoxy-manno-octulosonate cytidyltransferase OS=Nitrobacter  
hamburgensis (strain X14 / DSM 10229) GN=kdsB PE=3 SV=1

MTKTRTLVLIPARMAATRLPGKPLLDIGGLPMVVHVLRRRAETAGIGRVAVATDTPEIAAAVTAHGGEA  
IMTRADHPGSDRVFEALDRLDPDGRIETIINLQGDFTIRPDIIRDVLKPLADPAVDIATLAAEIHSDDEE  
ATNPVVKAVGSPVAPRRLRALYFTRATAPHGDGPRYHHIGLYAYRRKALQRFVELPPSPLERQERLE  
QLRALEGGMRIDIMIVDDVPRGVDTAADLETARRILASVPIPKLAYPRSNL

>B\_\_12 sp|Q9HZM5|KDSB\_PSEAE 3-deoxy-manno-octulosonate cytidyltransferase OS=Pseudomonas  
aeruginosa GN=kdsB PE=3 SV=1

MTQAFTVVIIPARYASTRLPGKPLQDIAGQPMIQRVWNQARKSAASRVVATDDERILAACQGFGEA  
ALLTRAHNSGTDRLEEVASRLGLASDAIVNVQGDPLIPALIDQVAANLAAHPEAAIATLAEPIHE  
VSALFNPNVVKVATDIDGLALTFSRAPLPWARDAFARDRDSLPEGVPYRRHIGIYAYRVGFLADFVA  
WGPCWLENAESLEQLRALWHGVRIHVADARENMLPGVDTPEDLERVRRVLGG

>B\_\_13 sp|B0BXB4|KDSB\_RICRO 3-deoxy-manno-octulosonate cytidyltransferase OS=Rickettsia  
rickettsii (strain Iowa) GN=kdsB PE=3 SV=1

MRHQDVAIIPSRLSSTRLLKQKPLQLIGSITLIERVFKQVNQAGLEHTYVATDSEEIASVITKVGKVF  
TDSAIPGTDRTYEAFKLPNNQININYVNVQGDMPFIEPSSILKIIIEYLKNSKYDIVTPIVKVDRESVK  
ASSNVTVVVDSAGTALYFSRSLIPNGAEFLYHVGMYGFRKNALEKRVSLKPTFLEKTERLEQLRAL  
ENGMTIGTCLVENVPISVDTEEDLKKAVKIFYENISKLGL

>B\_\_14 sp|B5F1S0|KDSB\_SALA4 3-deoxy-manno-octulosonate cytidyltransferase OS=Salmonella agona  
(strain SL483) GN=kdsB PE=3 SV=1

MSFVVIIPARFSSTRLLPGKPLVDINGKPMIVHVLERARESGAERIIIVATDHEDVARAVEAAGGEVCMT  
RADHQSGETERLAEVVEKCGFSDDTVIVNVQGDPEMIPAVIIRQVAENLAQRQVGMATLAVPIHSAEE  
AFNPNVAVKVVLDAGEYALYFSRATIPWDRDRFAKSLETVGDTCRLHGLGIYGYRAGFIRRYVSWQSP  
LEHIEMLEQLRVLWYGEKIHVAVAKAVPGTGVDTADDLERVRAEMR

>B\_\_15 sp|P0A0Z8|NEUA\_NEIME N-acetylneuraminate cytidyltransferase OS=Neisseria meningitidis  
GN=neuA PE=1 SV=1

MEKQNIQAVILARQNSKGLPLKLNLRKMNGLISLLGHTINAAISSKCFDRIIVSTDGGLIAEEAKNFGVEV  
VLRPAELASDTASSISGVIHALETIGSNSTVTLQPTSPLRTGAHIREAFSLFDEKIKGSVVSACPMEH  
HPLKTLQINNGEYAPMRHLSLEQPRQQLPQAFRPNNGAIYINDTASLIANNCFFIAPTPLYIMSHQDS  
IDIDTELDLQQAENILNHKES

>B\_\_16 tr|Q8KHC9|Q8KHC9\_PSEAE Similar to Cytidyltransferase OS=Pseudomonas aeruginosa PE=4  
SV=1

MKLAVIPARGGSKRIPRKNIKIFCGQPMIAWSIQAALNSACFDRIIVSTDDAEIAEVARELGAEVPFIR  
PHVLADDHTGTLPVIRHAIQACAMQGFHATQVCCYATAPFITTKDILQGLEISERSGITYAFTATTYAF  
PIQRALKLHPAGGVEMFNPEHFNTRSQDLEEVIHDAQGFYWGKVDSDWMQELPFFTVNSCPVLLPRH  
RVQDIDTVEDWQRAEWLWKAMRSQ

>B\_\_17 tr|A8V931|A8V931\_NEIME CMP-NeuNAc synthetase OS=Neisseria meningitidis GN=siaB PE=4  
SV=1

MEKQNIQAVILARQNSKGLPLKLNLRKMNGLISLLGHTINAAISSKCFDRIIVSTDGGLIAEEAKNFGVEV  
VLRPAELASDTASSISGVIHALETIGSNSTVTLQPTSPLRTGAHIREAFSLFDEKIKGSVVSACPMEH  
HPLKTLQINNGEYAPMRHLSLEQPRQQLPQAFRPNNGAIYINDTASLIANNCFFIAPTPLYIMSHQDS  
IDIDTELDLQQAENILNHKES

>B\_\_18 tr|A3GPP8|A3GPP8\_VIBCH 3-deoxy-manno-octulosonate cytidyltransferase OS=Vibrio cholerae  
NCTC 8457 GN=kdsB PE=3 SV=1

MSFTVVIIPARYQSTRLLPGKPLADIGGKPMIQWVVEQAMQAGADRVIIATDDERVEQAVQAFGGVVC  
MTSPNHQSGTERLAEVVAKMAIPADHIVNVVQGDPELIPPAIIRQVADNLAACSAPMATLAVEIEDEA  
EVFNPNVAVKVITDKSGYALYFSRATIPWDRDNFAKADKAIQVPLLRHIGIYAYRAGFINTYLDWQPSQ  
LEKIECLEQLRVLWHGEKIHVAVALEAPPAGVDTPEDLEVVRIVAERAQ

>B\_\_19 tr|Q7P7V1|Q7P7V1\_FUSNV 3-deoxy-manno-octulosonate cytidyltransferase OS=Fusobacterium  
nucleatum subsp. vincentii ATCC 49256 GN=FNV1841 PE=3 SV=1

MKFLGIIPARYSSTRLEGKPLKMIEGHTMIEVWYKRAKKSNDLALIVATDDERIYNEVINFGGQAIMT  
SKNHANGTSRIAIVCEKMTYEYDTVINIQGDEPLIEYEMINSLIDTFKENSNLKMATLKHKLIDKEEEN  
PNNVKKVCDKNDYAIYFSRSVIPYPRKNENISYFKHIGIYGYKRDFVIDYSKMSATPLEETESLEQLR  
VLENGYKIKVLETTSLIGVDTQENLEQVINYIKENNIKI

>B\_\_20 tr|Q7X5M6|Q7X5M6\_PSEAE Putative uncharacterized protein OS=Pseudomonas aeruginosa PE=4  
SV=1

MRDSMKYAVVIPARHASTRLPGKPLLDLCGVPMIVRTYRQCIQAVDAEHVLVATDDERIRAVCEGEG  
IRTLMTSSRCLTGTDRVAEVAGQVSAEIVNVQGDPELFPDDLRLKIDAAQASPEAIINGYCGIADET  
TFRNPSVPKVVFRPDGRLLYMSRAAIPTTKQGEFSRAWRQVCAYAFPREALRAFAARPTKTSLEEVE  
DIEILRFLELGVKMIEMSDQISVDNLEDVERVLDAILQRKPRTASVGGDQHAP

>B\_\_21 tr|A8KKK0|A8KKK0\_BURPS 3-deoxy-manno-octulosonate cytidyltransferase OS=Burkholderia  
pseudomallei Pasteur 52237 GN=kdsB PE=3 SV=1

MTSPLPFVAVVPARLASTRLPNKPLADLGGKPMVVRVAERAREAGAQQVLVASDAQRVLDVREHG  
FDAVLTRADHPSGTDRLAEVAAKLGFDDDTIVNVVQGDPELIDPQLVRDVASHLAAHPSCAIATAAH  
PIHEAHEVFNPVYKVVLDAGVVALYFSRAPIPWSRDAYLPHWPVNAAMPAPTCPVYRHIGLYAYRA  
RFLRTYPTLAQAPIEAAEQLEQLRAMWHGERIAVRVTEHAPEAGIDTPADLERVQALFRSRAK

>B\_\_22 tr|B6WU62|B6WU62\_9DELTA Putative uncharacterized protein OS=Desulfovibrio piger ATCC  
29098 GN=DESPIG\_01620 PE=4 SV=1

MAAATPCYRISYEQACDPNLVKIVRSDSGAALYFSRARIPFDRDEEGTGAYWGHMGMYAYRPDALK  
IFADHEPGMLERTEKLEQLRLLQHGVGIQTVLPPCAPGVDTPEDLERVRAIVKGKEFSTSAPATPATT  
SLADIRLVITDVGVLTDGGGLYYGPDGECIKRFHAQDGLGMVMLRKAGIRVAVLSGRDCPALRRRLN  
DLGIDMFRLGKVEKRAACESLLQEAGVSAHEALFIGDDLPDLDFACCLGVTVANARDEVKRAA  
DIVLQTQGGQGAFFRELVDMLLPQ

>B\_\_23 tr|Q7P731|Q7P731\_FUSNV Acylneuraminate cytidyltransferase OS=Fusobacterium nucleatum  
subsp. vincentii ATCC 49256 GN=FNV1768 PE=4 SV=1

MYREKKILCVIPARKGSKRIKWKNIVPLAGSPMLEYTVKCALNSKYIDRVIVSTDSYYIKKLAKKMG  
ADTPFIRPKNLATDDAKTIDVLLHAVKYCEEFEKEKYDYLVLLQNTSPLRKSQVDEAIEKIVSSTLD  
SLVSISEVREHPVLMKILSNKLIPLNLLKKNKFRSIYRINGAIFINKIDKNFNSDTILTNNQLPYIM  
KRETSIDIDTIEDIKVAEYYLGVEKMKKNQKYILKGEVWRS

>B\_\_24 tr|B1BCE5|B1BCE5\_CLOBO Acylneuraminate cytidyltransferase OS=Clostridium botulinum C  
str. Eklund GN=CBC\_A0051 PE=4 SV=1

MYMKNKILAIIPARGGSKGIPHKINIMKICDKPLISYSIEAAKSKYIDYILVSTDDVDIKEVSLNYGAK  
VPFLRPNEISTDRAKSIDVVLHGNYLKEHNDNFYVLLQPTSPLRTSKDIDDAIKNIIESDKDSLISV  
CECSENPILMRTIEKEKLPILFNGDNLRRQELPTFYVFNGAIYINKVYMLQNKKEFIDENTIPFIMD  
SKKSIDIDNMIDAKIAEMILKENKND

>B\_\_25 tr|Q70JW0|Q70JW0\_NEIME Cap29eG protein OS=Neisseria meningitidis GN=cap29eG PE=3  
SV=1

MNTENLKTIVVVPARYASTRLPGKPLADICGKPMIQHVYERACKVPYIDDVIVAVDDRRVAE VVESF  
GGKVIMTSTQHDSGTDRLVEVMGKYAADIYINIQGDEPLIRSEDIALLAQGMKDEQISVGTLCALP  
ASEATNPNTVKVVL SANGNALYFSRSPYPRDKEHAYYFKHIGVYAYRKETLAKYSNLKQPDIELSE  
KLEQLRLLDAGIDIRVFEVPETGPGVDTPECLERVRAIMSGQLPIDKHSVNLADIRLVITDVGVLTD  
GGIFYNENGECKRFHVRDGLGIRLLEESGKIVAVLSGRDSPTLRKRIDDLGISYYQLGIKDKHAACIE  
LMQEANCLKEQTAYIGDDTIDLPAFSACGLSFAVADTPEYIRNQADITLTLPGGYGAFRELADKILAA  
QGGKEDVFSSEAGFAQVMHGANQ

>B\_\_26 tr|A4NB24|A4NB24\_HAEIN 3-deoxy-manno-octulosonate cytidyltransferase OS=Haemophilus  
influenzae 3655 GN=kdsB PE=3 SV=1

MSFTVIIPARFASSRLPGKPLADIAGKPMIQHVFEKALQSGASRVIIATDNENVADVAKNFGAEVCMT  
SVNHNSGTERLAEVVEKLAIPDNEIIVNIQGGDEPLIPVIVRQVADNLAKFVNMASLAVKIHDAEEL  
FNPNAVKVLTDKDGYYLYFSRSVIPYDRDQFMNLQDVQKVQLADAYLRHIGIYAYRAGFIKQYVQW  
APTQLENLEKLEQLRVLYNGERIHVELAKEVPAVGVDTAEDLEKVRLLAKD

>B\_\_27 tr|C2CKH7|C2CKH7\_9FIRM MobA family molybdenum cofactor biosynthesis protein  
OS=Anaerococcus tetradius ATCC 35098 GN=HMPREF0077\_1987 PE=4 SV=1

MKINAILMASGLSKRMGENKLMLEFRGKKIYAYALGLLEEIGFDKVVVASSYKILKDAEARGFLAL  
ENKDNEVGKSSSIKLGVRACDEDAAMMFFVADQPLLSKETCKNLIASFKENPLMTYPRVGMRRGAP  
VIFPASYRKKLLSLEADQGGMIFAKDDKTNKVEIGNEDELDDIDTLEAYERLKKDHE

>B\_\_28 tr|C2XJH2|C2XJH2\_BACCE Cytidyltransferase domain protein OS=Bacillus cereus F65185  
GN=bcere0025\_48950 PE=4 SV=1

MNKQKVVAIIPARGGSKGIPRKNIRLLNGKPLISYAIEVAKKSNLIDKVVVSTDDIEIGNIAKKYGAEVI  
MRPDHISSDEVPLDPVIHYTVEKIEEELDESVDIVVTVQPTSPLLSIFTLNVIQKIKENYDTVLTGLD  
DRHLSWKLEQDKFVFNFKERKNRQYLPSEFRESGAVFATKRKCITPNRMGENITYVVGSEESIDID  
SYTDWWVAEKLLKRKLIIRVDGYREIGLGHYRRTLTAHNIFDHEVIFLMDKQYDLGIKLIKQNFK  
IEFFEQDPLPKIREISPDIIINDILDTSTDYMLKLNMGIKVFNFDLGPAGAEYADGVFNALYPGNVPV  
KYFYTGENYYCARPDFINSSTKIIKEHVNKVLTITFGGTDPNLTKKTLDAIVNMPYEFETVVLGPGY  
KYKDAIFKDIDNYSRVINVYTEINMAEFMLEADVIFSSAGRTMYEIAMIGTPAIIISQNYRELTHLFG  
HNYNGFINLGIHHEAREDIIQQSLERLIRDEQLRQMMNMRMLQHDLKRGIERVLSIIFN

>B\_\_29 tr|Q7P734|Q7P734\_FUSNV Acylneuraminate cytidyltransferase OS=Fusobacterium nucleatum  
subsp. vincentii ATCC 49256 GN=FNV1765 PE=4 SV=1

MGTIALIPVISSKKEGFSDRDMLMLGDSPLAYHTIKVVKASKEFSKIIVFTNSLEYKSIIEKNGVEILFF  
VEASYKYNYNIIKKILKENNDIEENFAVFSPLFPFRDEEDIKNAVNLLKKNIDKIDYKISKDVKKDKKI  
FDNRAIFLGKIESYLKRNLSKPKFIVCPLSDESLIKINNKLDFELAIAYNKRNSHKIIEQKIKRIEEK  
ERLFLEVTDITLIGHSIFDNWDIVEFKGKSVRNLGIGGISTEQYQKFIFDKNKISGKSSYFVIAGTNDIV  
NKNLSYFKISQQINLLIESIYEVSPNAKIFFIETPSVAFRDRKKEEIFLLNEIIKKNLKKEVYIPINTFLI  
DDFGNLKLEYTYDGLHFSEKGYQKLKEILEKEIEI



>B\_\_30 tr|B6WXZ3|B6WXZ3\_9DEL Putative uncharacterized protein OS=Desulfovibrio piger ATCC 29098 GN=DESPIG\_02973 PE=4 SV=1  
MNIIAIIPARMGSSRFPGKPLALIHGVPVGHVAFRTAMSRCLSATYVATCDTVIEDYCKEASLACVM  
TGDHHVRCSTRTAEALLKIEAATGRKADIVVMVQGDEPMVLPGMIDA AVEPMLKDP SINVVNLMA  
DMDTLEEFEDPNEVKVVVDRNNDALYFSREPIPSRKKGADKVP MRKQVCIIPFRDYLRFNEMEEES  
PLEICESVDMMRILEHGEKVRMVPTDARTWSVDTPEDLARVTRLMEGDVLMREYAK

>B\_\_31 tr|Q8KIQ0|Q8KIQ0\_PSEAE Similar to Cytidylyltransferase OS=Pseudomonas aeruginosa PE=4 SV=1  
MIAWSIEAAIESGCFDKVMVSTDDAEIAAVARKYGADVPMRPVELADDHAGTLPVIRQAIEGYLEK  
GVFAEQVCCYATAPFVRPEDLYQGCTRLEESGAAYAFSVTTFAFPIQRAIRLKEDGRVEMFQPAYMA  
SRSQDLEEAYHDAGQFYWGRSEAWLKEIPIFAGNAVPIILLPRHRVQDIDTPEDWVRAEWLFLKALLSE  
ADVSSS

>B\_\_32 tr|Q8KIU4|Q8KIU4\_PSEAE Similar to Cytidylyltransferase OS=Pseudomonas aeruginosa PE=4 SV=1  
MTTAYSFIFARGNSKGLPGKNIKILGTKPLL AHSIDVARSVREISKIFVSTDCKAIADVAQQYGAEVIW  
RPEELATDNSPEWLAWQHAIKTLRDRGDQDFLVSPLPATSPLRSTEDVQNCIYGIDENVDIVVTATPA  
ARSPYFNMLVRDERGISTTVCSGDTIYRRQDAPMVYDMTTVAYVTRPEYILGNERLFAGVVR SIVVP  
RERAIDIDDIYDFKMAEMLIMEKESNIC

>B\_\_33 tr|A4NAR0|A4NAR0\_HAEIN Acylneuraminate cytidylyltransferase OS=Haemophilus influenzae 3655 GN=CGSHi3655\_03511 PE=4 SV=1  
MTRIAIIPARAGSKGIKDKNLQLVGGVSLVGR TILAAQESGMFDQIVVTS DGENILKEATKYGAKPVA  
RPESLAQSDTRTIDAILHCLETNLISQGT AALLQPTSPLRNALDIRNAMEIFLGGKYKSVVSACECEHH  
PYKSFTLEGTEVQPIHELTD FESPRQKLPKSYRANGAIYINDIASLFEEKRFFIAPMRFYLMPT YRSIDI  
DSTL DLQLAESLISKEF

>B\_\_34 tr|B1BCQ0|B1BCQ0\_CLOBO Spore coat polysaccharide biosynthesis protein SpsF OS=Clostridium botulinum C str. Eklund GN=CBC\_A0401 PE=4 SV=1  
MNLLIIQA HMGSTRLPGKIMKKIRNKEVLLHVYERCKRAKVV D KIVIATSKNKENNQIEEFCKINNIE  
CFRGSSENDVLD RYKCAKVYSPDIIRVTSDCPLLEPKLIDFWVNNI IKDSVDFIEEEKELFTGFGLDIF  
TNNALIKMKNR NATLEKQKEHVVGYYDNKDEFKHKIYPLAEDLKYLYRNYRLTLDTKEDFELIKLL  
YEKFYNDNYINLKEVINYIDNNKKILNINENIEQKEY

>B\_\_35 tr|B5H541|B5H541\_STRPR Transferase OS=Streptomyces pristinaespiralis ATCC 25486 GN=SSDG\_00267 PE=4 SV=2  
MRQEPPMTVLAVIPARGGSKGVPK NLA AVGGVPLVARAVRA CLDAPLVTHVAVSTDDPGIAAVARG  
AGA EVVLRPAAIAGDTATSESAVLHAMDAHEAVHGAPVDV VLLVQCTSPFISREDIEGVARAVALDG  
ADSAVTVAPFHGFVWREADEAAAPAGNSAEQVGGGSVLVD TTTATGSGYGVNHDSSFRPRRQDRP  
QDFLETGAAYAMSAAGFREAGHRFFGRTALVHTD PARVLEVD DPHDLARARALAPLLDTAAVPRRE  
DIDAVVLD FDFGTQTDDRVLIDADGREIVSVHRGDGLGVAHLRKAGLELLILSTEQNPVVAARAHK LK  
VPVLHGIDRKDLALEQWCEERGLAPERVLYVGN DVNDLPCFH LVGWPVAVASAHDSVRAAARAVT  
ATPGGEGAI REIAAWLLGPTLNTPEPAPMSPKK

>B\_\_36 tr|Q9AGI3|Q9AGI3\_PSEAE Putative uncharacterized protein OS=Pseudomonas aeruginosa PE=4 SV=1  
MKYAVVIPARHASTRLPGKPLLDLCGVPMIVRTYRQCIQAVDAEHVLVATDDERIRAVCEGEGIR TLM  
TSSRCLTGTDRVAEVAGQVSAEIFINVQGD EPLFNPDDL RKLIDAAQASPEAIINGYCGIADETFRNP  
SVPKV VFRPDGRLLYMSRAAIPTTKQGEFSRAWRQVCAYAFPREALRAFAARPTKTSLEEVEDIEILR  
FLELGWEVKMIEMSDQSISVDNLEDVERVLDAILQRKPRTASVGGDQHAP

>B\_\_37 tr|A4C037|A4C037\_9FLAO 3-deoxy-manno-octulosonate cytidylyltransferase OS=Polaribacter irgensii 23-P GN=kdsB PE=3 SV=1  
MKIIAMIPARYSASRFPGKLMKDLGGKSVILRTYEAAIKTGLFEAVYVVDSEIIQENIANAGGDVIMS  
TAEHQCGSDRIAEAVAFLEVDIVINVQGD EPFIDKVSLSKLIDVFKNDSEKEIDLASLKVQITAKEE IEN  
PNNVKVITDINNMAIYFSRSVIPYQRDQDIAVKYKHKGVYAFR KQALLDFYKTPMTPLEAAEKIEA  
IRYQELGKKIKMVETTIESVGIDTPEDLEKAKRYLNLL

>B\_\_38 tr|A8V8Z5|A8V8Z5\_NEIME SiaB OS=Neisseria meningitidis GN=siaB PE=4 SV=1

MEKQNI AVILARQNSKGLPLK NLRKMNGISLLGHTINA AISKCFDRIIVSTDGELIAEEAKNFGVEV  
VLRPAELASDTASSISGVIHALETIGSNSGTVTL LQPTSPLRTGAHIREAFSLFDEKIKGSVVSACPMEH  
HPLK TLLQINNGEYAPMRHLS DLEQPRQQLPQAFRPN GAIYINDTASLIANNCFIAPT KLYIMSHQDS  
IDIDTELDLQQAENILNHKES

>B\_\_39 tr|B7R841|B7R841\_9THEO Cytidylyltransferase, putative OS=Carboxydibrachium pacificum DSM  
12653 GN=CDSM653\_494 PE=4 SV=1

MYRGKTILALIPARGGSKGVPRKNIRLLLDKPLIAYTIETALEVDFLDKIIVSTEDLEIAKISMEYGAEV  
PFLRPYELATDEAKSIDVVLHAMDWMEKHDETFDLILL LQPTSPFRNSEDIKTAFDIFFKKNAKAVVS  
VCEAEHSPLWMNTLNDDLNMKDFIRK DILNKNRQELVKYYRINGAIYIAEWN YLQQRNRTFFGNETY  
AYIMPKERSIDIDTEMDFKFAEFLIKLQKAN

>B\_\_40 tr|Q8F885|Q8F885\_LEPIN CMP-KDO synthetase-related protein OS=Leptospira interrogans  
GN=spsF PE=4 SV=2

MNGTRSTHKVYAFIQARTGSSRLPEKV LLEFPSSGSKTLVDRIYDRILTVLPKEQIVYLIPKEDKELRY  
FLNQ RNYLFFAGDLLVRRRYIEAAHFFNAD SILRLTGDNP FYDTIHLDQLLQSFQFFESDLSYV SGL  
PLGMGGEIFTRKALEWTPNTLEERHKEHVS LHIKENS DRFRITKLSLLSEKEKLILPKLRLTIDEPKD  
FETTSNIFNILNEQNPIFGARECINLFEIDPNV FAGNQNVEQIRFQTLPSQRTKKFRIGV FAGDPKDFGS  
GHFERSRILFALLATVPYETFWLREFPKEEDL DLLIVDSRDISIPEYSKTKVLLLDHFGSDRKKFH HYD  
LLPHSDIEDRFLDQILIPPGLFNLD RKQIDNSYILCYAGNIDHHTTFSLDSFLESLSLRENIPKIVRIGGT  
STTFKQIEFIPRVSKFKFQNL LATCSGFVSYFGQSLFEAIFLDKKVCTYSISP VHSSLSLLCEK KYGIPFA  
GDLNSTSLENEVKLQFSSQPVSGKGYPKLLQEIERILSEFDLSD

>B\_\_41 tr|B9P351|B9P351\_PROMA Acylneuraminate cytidylyltransferase OS=Prochlorococcus marinus  
str. MIT 9202 GN=P9202\_1704 PE=4 SV=1

MKTVAFIPARGGSKGLPRKNIKIFNKKPLIYWPINAALNSKYIDEVVVTTDDVEIADIAKNFGAYIPFI  
RPKDLAGDLSTTEETLQHALLKYEEIKGKIDIAIFMTCTD VFRKPEWIDDAIKKLMNPNLESV FSGH  
KTHKNFWEKDNKSNWIRIKDSMKIYSSRQIREFIVREDTGIICASRAYLWRNGRRIGDKVDIILNDDS  
FTGLDIHSEEDFLIAEFAHKIRNKINLK

>B\_\_42 tr|Q5ZXI0|Q5ZXI0\_LEGPH CMP-N-acetylneuraminic acid synthetase OS=Legionella  
pneumophila subsp. pneumophila (strain Philadelphia 1 / ATCC 33152 / DSM 7513) GN=neuA PE=4 SV=1

MRILAVIPARAGSKRLPGKNTRLLAGKPLIAHTIVAALQSSCCEEIVVSTDSKQIADVAVQY GASVPW  
LRSEDLATDTS DVIHTVIDLLFKFQQMDVFFDSV LLLQPTSPFRKPE TIRHAVEIHKVTGKSVVSVSPIS  
LKPSWCRSIDSQGNLVKPELFDLEIYCNENPIYKLN GSIYIATAKQIENKSFYSEPTKPLLLNSISESI  
DIDTPIDWALTEKLMELNQEALV

>B\_\_43 tr|Q8F5R2|Q8F5R2\_LEPIN CMP-N-acetylneuraminic acid synthetase OS=Leptospira interrogans  
GN=neuA PE=4 SV=1

MTDQKILGLIPARGGSKGIPRKNIKLIAGKPLIVWTIEAALKSKHLTSIVVSTDDPEIAEIAEQSGASVP  
FLRPAELATDYSSGIDPVLHALDNLPGFDYVMLLQPTSPLRTSADIDDCIEFTMRKKTNSVSVCEAQ  
ENPFWMFRLDDDSFKMTKLLNGEDVARRQDSPKVFTLNGSIYLSEVNYFREKKK FITDDTLAYLMS  
KENSIDIDDMIDWKLA EILLDDK

>B\_\_44 tr|Q8F5P2|Q8F5P2\_LEPIN 3-deoxy-manno-octulosonate cytidylyltransferase OS=Leptospira  
interrogans GN=kdsB PE=4 SV=1

MKTIAVLPARMASRRFPDKPLVKISGLEMIEHVRRRREMSSSVDEVVATCDEIHKQRVESFGGKAVM  
TSDVHRGCIDRVAEAAALYVEGDIVIVVQGDEPLILPAM LDDLKPKMLNDSSIYCTNLVTKIVDEEEFQ  
SPNAPKVVVDKNWDLLYASREPIPSRKKYPNEDY LKFKQLGVIAFRNDFLQTFAALAPTPLEIIESVD  
MNRAVEHGYKVRMVLTEGIMIGVDVPGDVS RVESVFKTDLLSKYLS

>B\_\_45 tr|Q2WB83|Q2WB83\_MAGSA CMP-N-acetylneuraminic acid synthetase OS=Magnetospirillum  
magneticum (strain AMB-1 / ATCC 700264) GN=amb0088 PE=4 SV=1

MSNRILALICARGGSKGLPGKNVRPLAGRPVIAWSVEAALGSSLIDRVVVSTDDPAIAEVARAAGAE  
VPFLRPAELASDTASLYDVIFHALEALDEEPSHV VLLQATSPLRIAADIDGCIRLCLDHGAPAAASLCE  
PGKSPYWMFLDPDGTVRPVIPHDASGGRRQDL PVAWAPNGAVYVAETAWLRRERNFWKAGVTLG  
YVMPLERSVDIDSLLDFRVAEMLMSDRLGPKAG

>B\_\_46 tr|C4PM35|C4PM35\_CHLTZ 3-deoxy-manno-octulosonate cytidylyltransferase OS=Chlamydia  
trachomatis serovar B (strain TZ1A828/OT) GN=kdsB PE=3 SV=1

MFAFLTSKKV GILPSRWGSSRFP GKPLAKILGKTLVQRSYENALSSQSLDCVVVATDDQRIFDHVVEF  
GGLCVMTSTSCANGTERVEEVSRHFPQAEIVVNIQGDEPCLSPVIDGLVSTLENNPAADMVTSVT  
ETTDPEAILTDHKVKCVFDKNGKALYFSRSAIPHNFKHPTPIYLHIGVYAFRKAFLSEYVKIPSSLSL  
AEDLEQLRVLEIGRSIYVHVQVQATGPSVDYPEDITKVEQYLLCLSKASF

>B\_\_47 tr|Q8F5Q2|Q8F5Q2\_LEPIN CMP-N-acetylneuraminic acid synthetase OS=Leptospira interrogans  
GN=neuA PE=4 SV=1

MNLAVIPARGGSKGLPGKNIKNLGKPLIAWSIEAAKRAKKIDRFIVSTDSEEIAAVAREWGCPVLKR  
PDELATDETKTISVLSQISKEIPEALNFILLQPTSPIRDVGLIDECLDLYEQGNYSNLATGYWCKYQEF  
GKHNNMRRQDYKGFYDDGNVYILSKKLVSEGLWFGDHICRHVISKRQNF EIDDEIDFVILEALLNK  
YGTIN

>B\_\_48 tr|Q2WB38|Q2WB38\_MAGSA CMP-2-keto-3-deoxyoctulosonic acid synthetase  
OS=Magnetospirillum magneticum (strain AMB-1 / ATCC 700264) GN=amb0133 PE=4 SV=1

MTRIIIGLIPARMAASRFP GKPLFPILGRPMIEHVFERAKLFGWRDALAICTCDEEIRAFQAQSKGYVIM  
TSDKHTRALDRVAEAATKCGVDVADSDIVLNVQGDPEMMHPDMIAATIKPMEERSEVRGTM LAMD  
IVDEAQFRNP DALKIHDLSGRVLYTSRQPIPHCKTFGPELEAKRIYGIFGKWFDFLKLFTLPPSPLEI  
KEACDSNRLYDYGHHQHIAYPFRPSFSVDSPHDIGIVEAAMKDDPLWGTY

>B\_\_49 tr|Q5LD42|Q5LD42\_BACFN Putative lipopolysaccharide biosynthesis OS=Bacteroides fragilis  
(strain ATCC 25285 / NCTC 9343) GN=BF2274 PE=4 SV=1

MKKNKILIIIPSRFASTRLPEKPLVKIAGKEMVLRVAEIANVVCNKVEGCNYIVATDHEKIVNFCKENN  
IAVMMTSENCKSGTERCWDVTTKIAEKPDFIVNLQGDNPLCPPWFIEQLIEAWKNDKEGQVFTPSLH  
LSWEEYDRMKESKITPYSGTTVEVDKFGYALAFSKAMIPVIRNEEKVRKILDKSPVRRHIGLYSYT  
YDALKKYFEVEASPYELPEGLEQMRFLHNRIPVKMIDVDYRNRKSMMSGVDSPEDIERA EKIIAEFGE  
FNLSPE

>B\_\_50 tr|Q3AHE8|Q3AHE8\_SYNSC Demethylmenaquinone methyltransferase-like OS=Synechococcus  
sp. (strain CC9605) GN=Syncc9605\_2247 PE=4 SV=1

MKKYAIFLPAKGNSERVASKNTRLLDGGKPLFLHTLEKLLQLGDDYEVYLDSECPEIFKMASHLEGFK  
PLIRDPALATNATDGNKLFNEVFSCNHQVIAQHLCTSPFIENNTIKNCFSKVQMSQDGCWWDSSFL  
VRKEK FYMWKNDLPLYSID SIPNSADIESTTVETMGLYVCSREAALDTERRIGRNPCLIEAKPLEAVD  
VNYEEDLEMAQLLAAGKREQERNLLRNLSLSSPIISDILDSLGLSQIIRGLNQKCRNNAKIFGPAK  
TMHLRRKSKEDRFDEVDAL KHYETLVPGDVICVQND CQEFAYFGELNANLAIRSGAIGAVIGGMT  
RDQEA VCSLGLPVFAKGITCQDVKNRAVYSSMNNRICIDGVFISPGDMMFADNEG TICIPKKHFKTVL  
ELAKESIRKEGEIISDIATGINVSALRAER GDF

>B\_\_51 tr|Q3AHH6|Q3AHH6\_SYNSC Putative acylneuraminate cytidyltransferase OS=Synechococcus  
sp. (strain CC9605) GN=Syncc9605\_2217 PE=4 SV=1

MAVPRGALALIPARGGSKGIPGKNLLTVGGVPLVCRSIRAALASNGVGRVVVSTDDEAIAAAAETEG  
AEVIRRP AEIAGDTASSE SALLHALDVLEKQGPLETELVFLQCTSPFTTGAQIDAVLAALHGRGSNSSF  
SVTPWHGFLWRADGRGINHDPALLRQRRQDLEPAFLETGAIYAMAITAFRRCGSRFCPPTSPVVLQE  
VGPEIDTPEDLALCRSIAAQKGE

>B\_\_52 tr|A7NHE7|A7NHE7\_ROSCS Acylneuraminate cytidyltransferase OS=Roseiflexus castenholzii  
(strain DSM 13941 / HLO8) GN=Reas\_0776 PE=4 SV=1

MLKRVVNRTARSAILHDVIVATTIEQEDETIVELCKKHGWPCFCGSINDVLDRYYKAARDYRVDVIV  
RITSDCPLIDPCIIDLVISKFLEKNPLDYASNTVQRSFPRGLDVEVVSFEALERAWHEDCNPLWREHVT  
PYYLHPEKFALTAVVNNKDYSYMRWTVDT PEDLDFVRRVYDHFGHDNFSWKEVLAVLDEHQDWL  
AINSHIQKVI

>B\_\_53 tr|Q2W0L5|Q2W0L5\_MAGSA Spore coat polysaccharide biosynthesis protein F  
OS=Magnetospirillum magneticum (strain AMB-1 / ATCC 700264) GN=amb3806 PE=4 SV=1

MKIIATIEARMTSSRLPGKVLLPAQGRPMLARMVERLKMVPSLDGIVVATTVNATDDPIEALAAELGI  
GCWRGSEDDVLKRVLDAAHAFAEADVIVELTGDCPLIDPAIVETCVQAYRAAGVDYLSNVQERSFPIG  
MDTQVFATAILDDVARRTDDPTDHEHVS LYIRHPELYSLKNVAAPPELRDPELRLTL DTPQDYQLID  
QVFAALLPQGP GFALGDILALLQARPELRKINDHVAHRWV

>B\_\_54 tr|Q2WB80|Q2WB80\_MAGSA CMP-N-acetylneuraminic acid synthetase OS=Magnetospirillum  
magneticum (strain AMB-1 / ATCC 700264) GN=amb0091 PE=4 SV=1

MSRAVAIIPARGGSKGILRKNLREVGAPLVVHTIRQALESSSVDRVYVSTDDTEIRDVSQAAGAHVI  
HRPVDISGDTISSEAVIHHALPVMRQEGDFDLVVFLQATAPLRAKGDIDGAVATLVREEADSLLSVRS  
HRFLWRQGTQGPEAINYDPAHRPRRQDLEAQFVENGSIVFKPWVLERYDNRLGGRIALYEMTASA  
AFDIDDEIDLAVIDLMLTRRF

>B\_\_55 tr|O25093|O25093\_HELPY CMP-N-acetylneuraminic acid synthetase (NeuA) OS=Helicobacter  
pylori GN=HP\_0326 PE=4 SV=1

MRAIAIVLARSSSKRIKKNIIDFFNKPMLAYPIEVALNSKLFKVFISSDSMEYVNLAKNYGASFLNL  
RPKILADDRATTLEVMAYHMEELELKDEDIACCLYGASALLQEKHLKNAFETLNKNQNTDYVFTCS  
PFSASPYRSFSLENGVMQAFKEHSNTRTQDLKTLYHDAGLLYMGKAQAFKEMRPIFSQNSIALELSP  
LEVQDIAHFRRFRISQAQIQPFKRMVPKILCDCFLTSGLGHVRRCEKILSFIEKLGVEASLYLHKQNN  
ISAFLEGVGGNDFLITDSYCLNSKDFYLLKEKAKSLMVIEDTEHAKGFYKNTKILNFTLNALKHYH  
HLSKDYQYYLGVGFYVVDARFIYDRPINTENKEVLITLGGSEQKTLKEIVKILENKNVNLHIISPYTPK  
NPPKNTHYYSPLNPLEFSSLMKSCACAISAAGQTLYELALSQTPSLILPIASNQIIQSKEFESLGIFKQTS  
LKTAKDFENLQIQKNQAWAKNLVFGDKLEGALREFLEI

>B\_\_56 tr|Q3AN76|Q3AN76\_SYNSC 3-deoxy-D-manno-octulosonate cytidyltransferase  
OS=Synechococcus sp. (strain CC9605) GN=Syncc9605\_0180 PE=4 SV=1

MAIRKCVVAVPARLQSSRLPNKVLADIGGKPMIQRVLERCSEAQGVAVVLCSTDELQTLAEGWGF  
PVLMTSESCNSGSERIASVAHPLMALGWGDADPVAEETAVINVQGDQPFIEPAVIDAMAEEFRSQDPV  
PAVVTPVYGLKPESVHNPNVVKTLAHDGRALYFSRSAIPHVRDIAEADWHQHTTYWGHVGMYPF  
RGDVLAAWDQLPASPLEDLERLEQLRLIEAGLTIATFRVEGTSLSVDTAEQLEQARAMV

>B\_\_57 tr|Q3ARI1|Q3ARI1\_CHLCH Acylneuraminate cytidyltransferase OS=Chlorobium  
chlorochromatii (strain CaD3) GN=Cag\_1132 PE=4 SV=1

MQTVAIIPARGGSKGLKYKNIYPVAGKPLLAWTIEQARASQFVDKVFVSTDSEDIADIAKEYGAEVIE  
RPADIAGDKATSEAILHALNVIQAEHHITVSAVVFLQATSPLRKQGDIDGAIELFRRENADSLISVTK  
ADDLTIWEQRKSGEWASVNFYRNRGMRQDRPAQFIENGSIMFTPETLHRFNRRIGEKLVAEMEF  
WQTWEIDTLNEIELVEFYMKRKGML

>B\_\_58 tr|Q3ANB5|Q3ANB5\_SYNSC 3-deoxy-manno-octulosonate cytidyltransferase  
OS=Synechococcus sp. (strain CC9605) GN=Syncc9605\_0141 PE=4 SV=1

MAIRKCVVAVPARLQSSRLPNKVLADIGGKPMIQRVLERCSEAQGVAVVLCSTDELQTLAEGWGF  
PVLMTSESCNSGSERIASVAHPLMALGWGDADPVAEETAVINVQGDQPFIEPAVIDAMAEEFRSQDPV  
PAVVTPVYGLKPESVHNPNVVKTLAHDGRALYFSRSAIPHVRDIAEADWHQHTTYWGHVGMYPF  
RGDVLAAWDQLPASPLPPSGSRAPRCRWTPPNSWSRPGR

>B\_\_59 tr|Q1QP14|Q1QP14\_NITHX Acylneuraminate cytidyltransferase OS=Nitrobacter hamburgensis  
(strain X14 / DSM 10229) GN=Nham\_1201 PE=4 SV=1

MPNEVVIIQTARMTSTRLPKILMRAGERTLLETHLDRLADVGVVIVATTTNLSGDPVVELCAALD  
VPVFRGSENDVLERYQRAARAHEARHVIRVTSDCPLICPDVICAGLDVYLGLKSESIYLSNGERRTYP  
RGMDFEIFSRRSLDFAAEHARLPSEREHVTCIRTSMPDIRHEHCTDEEDLSDWRITVDTVDDFKLA  
KLLIEDHHAEMDYPGLKALLKAHPELMKINSHIQKPI

>B\_\_60 tr|Q2W9F3|Q2W9F3\_MAGSA Spore coat polysaccharide biosynthesis protein F  
OS=Magnetospirillum magneticum (strain AMB-1 / ATCC 700264) GN=amb0718 PE=4 SV=1

MTAVVIVQARMGSTRLPKILKGLGMSALAQCLRRCKAIPGIDRVVCAIPEGEAEAPAVAEARCG  
ALVVRGSPDDVLKRYALAAAGADIVMRVTSDCPLIDPDLGRLAKLRAEGLDYCCNNLPPSWP  
HGLDAEVFRATALFEAEKATEPFDREHVTPWLRRAPHLKRGNIAREEGDLHQCRWTLDPEDYA  
FLAALFERLPEAIVSMEAVLAVLAANPALADINAMRRGVRAMPVPAKGASVSDRR

>B\_\_61 tr|C4PPI9|C4PPI9\_CHLTJ 3-deoxy-manno-octulosonate cytidyltransferase OS=Chlamydia  
trachomatis serovar B (strain Jali20/OT) GN=kdsB PE=3 SV=1

MFAFLTSKKVILPSRWGSSRFPKPLAKILGKTLVQRSYENALSSQSLDCVVVATDDQRIFDHVVEF  
GGLCVMTSTSCANGTERVEEVSRHFPQAEIVVNIQGDEPCLSPVIDGLVSTLENNPAADMVTSVT  
ETTDPEAILTDHKVKCVFDKNGKALYFSRSAIPHNFKHPTPIYLHIGVYAFRKAFLSEYVKIPSSLSL  
AEDLEQLRVLEIGRSIVHVQVQATGPSIDYPEDITKVEQYLLCLSKASF

>EU\_Acyrthosiphon tr|C4WWF5|C4WWF5\_ACYPI ACYPI002677 protein OS=Acyrthosiphon pisum  
GN=ACYPI002677 PE=2 SV=1

MTVRNSHWVALFSQLFVLSASVVLFMIPYLLWSHITYEQNHLSNYKPHVVALILARGGSKGIPRKN  
LAVIQNTTLLRRSLDTINDCGLFHDVWVSTDDKEIAAEALAGAKVFHRSASDEATSLSAVKEFS  
MYHQKVDIFAIQCTSPFMTAEYLTRAYKMAVNQKFESVFSVTRTHKLRWKLDSDGQLQPSNFDVT  
KRPRRQDWDGEYVENGMFYFTYKNLIVNNKLQGGKLGVVVIPLNRSLEIDTQFDLQAARLLAPLLD  
KPKNVTNRTNEIHKKS

>EU\_Aedes tr|Q16KU9|Q16KU9\_AEDAE Cmp-n-acetylneuraminic acid synthase OS=Aedes aegypti  
GN=AAEL012868 PE=4 SV=1

MRLVLILTLSSAHPAFGFLQEKSVCPTSPESISNDSVIALILARGGSRGIPLKNLAKLDDRQTLLSRAL  
HTALSTDGFHSVWVSTEDDRIAQAVERDFPHDLVRVHLRPPEVAQDHTSSIESVREFLDHHPRVQNV  
ALVQCTSPFLGVRYLDEALQRFQSLRVDCVFSVTRSFKLRWRKEKDGRVNALNFDPRKRPRRQDW  
DGELVEAGMFYFARRKLLLEGRFQNNNCEVVVIDERDSLEIDSLEYDLELARKIIGSTVE

>EU\_Anopheles tr|Q7Q9Y7|Q7Q9Y7\_ANOGA AGAP004527-PA (Fragment) OS=Anopheles gambiae  
GN=AGAP004527 PE=4 SV=4

TIHQSGVFDISIWVSTDHEQIAYEADRHGA AVFARSAMHAQDHSTSLDAVREFLDAHPEIHNALIQT  
SPFLRAHYLVTA AHQFHSRMNAGMENAPACTFSVRSYKLRWKEDVETGHLKAINFDPFARPRRQD  
WPGELVETGMFYFADRRMLMEMGSFQSETCTVVEVDEQDVLEIDNWRHLTLARILLGME

>EU\_Aq [rspp] Aqu1.200879

MIALVCELALAGRVDVAVVAGDDERILEAARAEGAQAILTSSSEHRSGSERIAEISLLGLDPDVVVVNI  
QADEPLLPTLIDQVAGLLVDRPEFAMATLCEPIEKARDIFDPAVVKVVFDAQGRALYFSRAPIPWQR  
EAWSSTASLRPAADEDEDALDRLPATAGVRHYRHIGLYAARAX

>EU\_Arabidopsis tr|Q9C920|Q9C920\_ARATH AT1G53000 protein OS=Arabidopsis thaliana  
GN=AT1G53000 PE=2 SV=1

MSVCSSSSSSQKTWIVNGILAGTAIAAAIGARAYLGRSKKFRSRVVGIIIPARYASSRFEGKPLVQILGK  
PMIQRWERSKLATTLDHIVVATDDERIAECCRGFGADVIMTSESCRNGTERCNEALEKLEKKYDVV  
VNIQGDPELIEPEIIDGVVKALQVTPDAVFSTAVTSLKPEDGLDPNRVKCVVDNRGYAIYFSRGLIPYN  
KSGKVNPDFPYMLHLGIQSFDSKFLKVYSELQPTPLQQEEDLEQLKVLENGYKMKVIKVDHEAHGV  
DTPDDVEKIESLMRERNMS

>EU\_Branchio tr|C3Y778|C3Y778\_BRAFL Putative uncharacterized protein OS=Branchiostoma floridae  
GN=BRAFLDRAFT\_123265 PE=4 SV=1

MLIPDDVYKVLNLMGFLSWLGLAVTVSGMVWRYKKPDLPRPIKLNLAIPVLFVLLSLFMVGVVSF  
VSAPVECASGLAILASALPVYAVFVHWENKPTWFLSFEGYYLSQRLTPYERMMNEERGLGMADPRA  
EIHEKVQQAGIPLIQENDYQIVENGLVGTGTFGKVYKGYDDDEVAVKEIQMGRKVKLTLDHQIREIQ  
IHGLLPGHKNVASLLAVSIGKNLRMICNFIDGRSLDEIIFEDEIPKLLKDALPFPNLSQCIYFEPVQIPA  
HEEPYVALQIAEGVAHLHDCGIIHRDLKPENVMVDTKRHAYICDLGTAKVEQHNNLSVIESMIKPGS  
PIFLAPECSVDGLDADYSSDIWSLGC TLAE LFAREEIWETEDIEFELKRNLKDRKEPDGLKDVREPFN  
SLVRKLLSYDPKNRITAFDAVRELQKTFDWKKYEQYKDLTSQNILENRRDALPFPNLSQCIYFEPVQI  
PAHEEPYVALQIAEGVAHLHDCGIIHRDLKPENVMVDTKRHAYICDLGTAKVEQHNNLSVIESMIK  
GSPIFLAPECSVDGLDADYSSDIWSLGC TLAVTVVELHNNNNK KLHSDDINGFAGHTIGYADWSSS  
PTFSPSVHKRCTMNDSLSTINLEHLGNSASN VIGTSHVTLPTIPQAPSGTGIPVSIANIPVTLSSGLTTI  
PMLFPLRPMVNNLTSVQNTPVGLDKSLTLDITSLRQMSSDLLTSLTLIAATTTLTSTAALPPINTHV  
VNQQNILQGGNTSTVNVTTPMSSISVFPNSNNLTVTTCVLESLLQPTIQNHVPVGSGERSLAVAR  
QLEEELNEPIKTFDFWVTRTAIQARTQFGPLQGGKIVKKS DVESESDWTNMWEIFRDERSSH FIDARDE  
NEANWMMFVKRARTSLEQNLVAHQCGGDIFFTSCKDIAEGDELMLWFAGNYAKLTGVTSKPEQSY  
KCCSCERQFADL GALGRHTKYAHPDMTGRKWKCDLCERAFTSSSKLQVHIMVHTKVKPHKCNCE  
KTFTDPSNLRTHLTIHTGVKKHACSVCNKTRFRQAHLLSHMVHTHTGEKMKKCQFCDKMFSRQSDV  
KQHMYMHTRDREVKCEECGKIFWRLQHLKHKMSHTGERNFPCDRCNKAFFTKYHLNRHKKAC  
KGRNAQQNTD VVRV VISEMAPNGGPTQNV DVTRGKTSKKQRRQNTKTRASALQFPTDLLGGAE  
QHGVQMVDSDNLICNGNNGGIVMPVPIVPIVNTTGG LMPQVIIQGGQPFGNVKMTNNGKSAPEL  
RYKRMGFEPTEP LRAEWKRRFGKEEPHIATLILARGGSKGIPMKNNK KLGLELIGWVIRAAIDSDI  
MDSVWVSTDHDDIAATARKCGAQVHRRSAEVSQDTCNSWVTIDEFAKYHPEVDIIVDIQATSPCLHP  
FHLHDGMRLTLKDGYSVFTVVRRHGFRWTD PKWGIQPFPLNFDPAKRPRRQEWNGEIVENGAFY  
MMTRDVEQQGLMQGGMAYLVMEPEYGV DIDTDLWEIAEQRLFRFGYHGRTPKTVKLVVNNID  
GTL LDGQVQVSP TGEELRSFKTTD DIVGVQQLRENGIEFRVVAEGDNEVQRALAGKLSAKLEENCTD  
KLTVIDAWRQELGLEWKDIGYMGYDISDMSCIKKAGMSACPSDAYAAIQKHSHFISTYRGGQALR  
EFCEQVLEKGNMAAYVDVAEQTWDDFQRKRSEGM AKKSRTSLSQSQSVGSDVPSI

>EU\_Branchio2 tr|C3ZUW2|C3ZUW2\_BRAFL Putative uncharacterized protein OS=Branchiostoma floridae GN=BRAFLDRAFT\_115660 PE=4 SV=1  
MDGDCATTEDLCMQRFGKKKPHRACLVLARGGSKGIPLKNIKPLAGTPLVGWVLRAAIDSEAFDSV  
WVSTDHDEIAAVSREFGAQVHRRSPEVSRDASTSLETIQEFIRAHPEVDIFGNVQATAPCVHPFHLRK  
AMKAMTEDGFDSLFAVRRHAFRWKEVKEGEVTAPLNLNPEKRPRRQDWDGELIENGsfyfCTTA  
LVQKGLLQGGKVGYLEMAAEYSVDIDIDIDWPIAEQRVLRFGYFGKEKRQAPCLVVVSAEGALTEA  
QVHLSPTGEEFRSFNVHDINGMKQLANRGVEVRIISEDESEVHRQLAAKIGCKLEEGCEDKLAIVDS  
WRKDLGLDWLQVAYIGSDASDSECIKKAGVNGCPLDAQYPAKNYSRFVSKRRGGQGAIREFCEHV  
EITIEKANNENKPRPE

>EU\_Branchio3 tr|C3Y777|C3Y777\_BRAFL Putative uncharacterized protein OS=Branchiostoma floridae  
GN=BRAFLDRAFT\_123266 PE=4 SV=1  
MPMVQCMLDPCDVATCPGNPRARCEHNFCGGCNAVfyDKTGAMADCNGDGCpDDKPMARCM  
DPCDVTSCSANPDATCVADYCGGCNANFFDRSGEPAWGSKGIPMKNIKMLGDLELIGWGIRASLDS  
DIMDSVWVSTDHDDIAAVASRCGAQVHRRSSQVSHDKCNSWTAIDFVRNHMDVDIIVHIQATCPC  
VHPFHIQEGVRMMLQDGKDSVFSVYRRHQLRWSTPRYGMQAYPLNFDVYDRPRRQEWPGELIENG  
AFYMFTRDVEQQGVLQGGRMGCLVMDSEYSIDIDTDQDWQLAEQRLLRFGYHGRAPKKMKLVVV  
NIDGTLDDGKVVQSSTGEEYRSFKATDIAGIQMLQRNGIEFRVVAQGESQVQKELAKKLSLKLEENC  
EKSGMSGCPSDADTEVQKHSHVVSiyRGGQGalREFCEQLLLKCGVEPTLEARNETGNFKVSSRVI  
QKDQVSSQPEMPS

>EU\_Branchio4 tr|C3Y2M7|C3Y2M7\_BRAFL Putative uncharacterized protein (Fragment)  
OS=Branchiostoma floridae GN=BRAFLDRAFT\_124744 PE=4 SV=1  
MDKIINITPQLESIWERRFKTKTPHKCALVLARGGSKGIPMKNIKMLGGTPLIGWVLRAAVYAEVFD  
I WVSTDNERIANVARDYGAQVHYRSEEVSKDTTSSWETVGEFLQHHPEVDIIANIQATSPCVHPFHIQ  
EGMRMLLEDSYDSVFTISKKHGFIWKEPPQKDMQPININLDMNRPRRQDYDPEPVENGAYMYTR  
DIHAQGKTQGGRIAWLEMGGEYSVDIYTDLDWDIAEERLLRFGYHGKHPKIVKLVVIAAEGVLLDN  
HVEINVRGEELMSYHLSDVNAIKHMQNNLVEVRIIAEGENVVQRRLAASLGCKIHENTKNKLQVLD  
QWREELGLTWRNVGYMGSENTDTQSVKAAGMSACPADAHDDVQLVSHFISKYKGGQGLREFSE  
QVLKVNKMSTYKDRVDKTTVYANVQRNLRRQILSMAPTERIPHIFTLILLQVVISNQQAVVLPVTRIP  
TAISSFTGRGLDDQAVARAANTINWRSKFYRFLQGRNGDELNEDDLVAEARVLAALKQPKLNAI  
SAPALRHLLTSADIARDVPSVVYILENIDLKFFDILQIAASTTAVGQSRQPDERSVIVPSRPVNGLP  
LRDAILNIGMKHMQGDLDEAWQDSLPLKSPYLPGITVGHVNRVKESDMVADKLELLQNIRPRLSN  
AVRANVVRYFKRVKAGNWSTEENVINSLGVFVGDISLNDVDNITIDTWKLVFNHRLEDIDITTLARG  
ILDKLLYANVTVTEPIYNVQKLGKLTCLPEALGYRANSLSQDVWRELARVLHKCNTGVTGRPGNQ  
LSRPGRKLAQRIAKSLIPAPASASVTDLRNVGPAIVGLSVSDLRQLQGRRVFD AISLSQAQGLSRAQ  
AQALLQKYVDGKIVGNPDSVVNDLGPLISDLSLGSVKNVFPSSQDDIPLATLPWSQAQAANLIKR  
IKESRQLTPALVGTFTGTLRGRICPDMDDVALQDIVEVVVTLYDYVDQLPRGVRVCLANATQVAMNI  
TLKSGRVTGSTGAVATVPGHVIAEMRYEILASIPRPDCSDVFRKIGKLDMSHFPLWYQRNITALALTC  
LGKQKGGQYRLDATDVVLGRFLCHIDDFKITEDAVLDAINILKECQCFTYRQREAVKDLIKTAFG  
NNARWWTSSSELGQAGPLLHLLDGDIQRISQDALLDAVDQVLPVPQDNRDIIANRSTDRDCLAVKR  
NNNLYRRVITAVARGRTSPIPPRNRRTLQAPLLCDQVQLLGDVAVVQLTEQQVTYMENREFLDCLEV  
FGAARANNTDWDSYMLRILRIKTFAAAGGTVQQLTPDIMARVGRIVTFSPGDALALNY

>EU\_Candida tr|C5M2S3|C5M2S3\_CANTT Putative uncharacterized protein OS=Candida tropicalis (strain  
ATCC MYA-3404 / T1) GN=CTRG\_00362 PE=4 SV=1  
MEFTAIVVCGK GKALSPFSQIRSTGIPKALLPIANKPMVHYVLDWCLKANFAKVIVLADEDENDNKL  
IQASVTKFQEEYEKKENRPAQVNVIGYNCNNGSILHYLYKIYNDEEQSNALNKNFIILPCDMITNLP  
PQVIIIEAYRNKQETDLGLLIAYKNQLDIEDKKGKIFPRNYTIYSDNDASGNNGPVLLDMYNTQDIEFH  
QALTIRTQMCWRYPAAATISNTLLNSGIFIGSCKEIFDIFQAQKERFTESYFAKRSLLKIVRDLRRSWRH  
ATAQENIGLFIVPQQATFFRCNNLPVLMEANRYFMKLQAMNKSASSSVKQDKQSGAHVGNDSLVE  
STELGEKTNVKKSVIGSNCKIGRKNKITGCLILDNVVIGDDVTLENCIIGHDVIIQAKSKLTNCNVEST  
NEVVSQTQTKNTNLLCLTLEGLVEGEEVIDSSEEIDDDSDDEDESEFEDEYTGNEDEGLFAY

>EU\_Ciona tr|Q0E670|Q0E670\_CIOIN Putative CMP-sialic acid synthetase OS=Ciona intestinalis  
GN=cmas PE=2 SV=1

MEHSNSAINHLAALILARGGSKGIPMKNIVNVGGLPLICWVLRAAVDSNAFDSIWVSTDSDEVAEVA  
SSYEVVKIHRRSDEVSKDNTSSMESTQEFLNYHPEIDAIGLLQATTPCIQPSQLLSAAEMIKFGGFDSDV  
FSVVRRHFFRWKEVKQKGDGDVTHPLNFDPSHRPRRQDWAGELCENGGFYFAKTSVVRQGLFQGG  
RTGYQEMPHEHSVDIDTPFDLVVADYVINKYGYKKGK

>EU\_Drosophila tr|B4LGF7|B4LGF7\_DROVI GJ11503 OS=Drosophila virilis GN=GJ11503 PE=4 SV=1  
MNAPIYWFLTFVLHSTNDVHALILARGGSKGITYKNLVQIDGLSILSRAITITISNSSCFKHIWVSTDDE  
KIALEAKKYGAIVHIRPAKYALDGTSSIEAIQEFLEGHKAIDNFALFQCTSVFLKEKYIEEAYQKFKVH  
DCVFSVKRSHNLRWKYVEEQILPDNFNLKRPRRQDWKGMVEAGMFYFSTRKLAMKGLLQNKK  
CDVVEIAAEDGLEIDSYQDLAIARCIINSNI

>EU\_Ixodes tr|B7Q984|B7Q984\_IXOSC Cmp-N-acetylneuraminic acid synthase, putative (Fragment)  
OS=Ixodes scapularis GN=IscW\_ISCW021121 PE=4 SV=1  
MRVAGLVLARGGSDAVKKNARLVCGLPLLSWVLRPMRHCKTLDEIWWSTDEQEIEDIANAEGCSV  
LRRSEDFQAESPILAVQEFVRQAPGVEVIALVQCTSPCLAPSYLDEAVSLVTSKYDSVFSIARDYK  
WRWTELSQGAHLSLKRFLVGPADGTRPLNFDPAQRLCRQEWAGEIVESGHFYVTRAEFVREGLLQ  
GGR

>EU\_Micromonaspu tr|C1N3H9|C1N3H9\_MICPS Predicted protein OS=Micromonas pusilla CCMP1545  
GN=MICPUCDRAFT\_52178 PE=4 SV=1  
MGCAASKADEPARKVRVLGVHARCDAKDSKAFPHGKPLVDVAGAPLVWRTFLKVRGAKCVSRV  
VATDDDRIARVVAALGGEVVRVSGKWSHTAAAVWETCERLRFWSGGGGGGGGGAKKNQKNL  
TATVDGGGAESSPSPFDVVVCVDADEVGIDAHVERLADAVAGSDAVMGTLACDRPGPPSGGGGG  
GGGGGDGDERRRRGVDRRKVGARSYRVSFLPKLSRRSLSNDEDRSSPRGHLAEEAWPCREEREA  
AACGRTVKREVAESVPRVGTREELARETARARELPTPKVRTAGVSARGGASRKNTV

>EU\_Micromonassp tr|C1E3I1|C1E3I1\_9CHLO Predicted protein OS=Micromonas sp. RCC299  
GN=MICPUN\_57690 PE=4 SV=1  
MISARTAARCSRRRYASRRRLPTGVARHPSRHRRAFSPTRLLVPFRAARLAPPRPERAYRVVVERGS  
ERHATSSLRRSRPLTFDSRRSRTQPRVLGVIPARYNSRRFAGKPLALLGGKPLVMHVYRNACKAKCL  
DACVVATDDDRIAKAVRDNGGEVIMTDAACETALERCLEVVRLRRRRADGKKGTTWTAASGEFD  
VVVCIDADEPFVQPHHIETVADLVINSDAVVGTLVRRGLNEEDVASADTVKVVTTDDRDRYALLFSREP  
VPRRGSSAGGGGVRSAYDPGVAYKVRVGIQACGTFLEKYASLPGCGGEGSIEQSRVADKENTSPR  
RTTKNGDSCAIPPYEPPDEPEQNRVVFAGYKVKVDVVESTFVPGVKTPEDLRHLNAGLGAGLVNDL  
QLTFLVA

>EU\_Mus sp|Q99KK2|NEUA\_MOUSE N-acylneuraminic acid transferase OS=Mus musculus  
GN=Cmas PE=1 SV=2  
MDALEKGAVTSGPAPRGRPSRGRPPKLQSRGAGRGLEKPPHLAALVVLARGGSKGIPLKNIKRLAGV  
PLIGWVLRAALDAGVFQSVVWVSTDHDEIENVAKQFGAQVHRRSSETSKDSSTSLDAIVEFLNYHNE  
VDIVGNIQATSPCLHPTDLQVAEMIREEGYDSVFSVVRRHQFRWSEIQKGVREVTEPLNLNPAKRP  
RRQDWGELYENGsfyFAKRHLIEMGYLQGGKMAYYEMRAEHSVDIDVDIDWPiAEQRVLRFGYF  
GKEKLKEIKLLVCNIDGCLTNGHIYVSGDQKEIISYDVKDAIGISLLKKSIEVRLISERACSKQTLASL  
KLDCKTEVSVSDKLATVDEWRKEMGLCWKEVAYLGNEVSDEECLKRVGLSAVPADACSGAQKAV  
GYICKCSGGRGAIREFAEHIFLLIEKVNSCQK

>EU\_Oryza tr|Q688Y2|Q688Y2\_ORYSJ Os05g0561500 protein OS=Oryza sativa subsp. japonica  
GN=OJ1115\_B06.12 PE=2 SV=1  
MPICPPSESSPAPGLGGRALIFHGLALGAAAAAAAAAAYLYRRPGGFRGRAVGIIPARFASSRFEGKP  
LAPILGKPMIQRWVRLASSLDHVVVATDDERIAECCRGFGADVIMTSESCRNGSERCCEALQKL  
NKHYDIVVNIQGDEPLIEPEIIDGVVMALQRAPDAVFSTAVTALKPEDASDTNRVKCVLDNQGYYAIYF  
SRGLIPFNKSGKVNPFYLLHLGIAGFDSKFLKIYPELPPTPLQLEEDLEQLKVLNGYRMKVIKVD  
HDAHGVDAPEVKEIALMRARNIQ

>EU\_Ostreolu1 tr|A4RSI4|A4RSI4\_OSTLU Predicted protein (Fragment) OS=Ostreococcus lucimarinus  
(strain CCE9901) GN=OSTLU\_36315 PE=4 SV=1  
MARIVAFVPCGTSSRVESKNTKLLDSKPLFLHTLEKLLFECPFIDKVVLDSESDVFKVAEFLASDN  
PKLVFLKRDEALATNKTDGNTLFMNEVERFDAEIYVQALCTSPFIHPETIKKGVESVMSGVYDSACT  
VRDDKLYTWTKAGPSYDIQNIPNSVDLPTTTVETMGLYNITRDAAKLTRRRRIGNKPHMLHVTPEEAV  
DINYEVDFAA

>EU\_Ostreolu2 tr|A4S882|A4S882\_OSTLU Predicted protein OS=Ostreococcus lucimarinus (strain  
CCE9901) GN=OSTLU\_27757 PE=4 SV=1

MSANFVLGVVSAPYEDGEDDQFAGKALMIVHGKPAFARAAESMKRCARLDRVVVATDDYRIVETA  
KEYGIETVLVAQDARRTASTYARQAALKTGGGWDFVVTLLKVFDECLIDADSVDACVMEMEANADE  
WCVASTCVAATDPARFESETRPRCVFDKQGFALYLTRAVIPAIGSKPRETMTGELDLTPTKRETKNRL  
DAAAMHWHVVLGCSCYDAMYLRTLVDSDNDTTPLQRMENIEALNTLENGYKIKVCPVNNQTPALR  
APEDVAVLEEVLRARVVQNAASAVKKKRASPKSALPRHVKRDKSRAARVRAEPSASEVSDAPSPSA  
GSPSATDDVPSPRAGDRTAAS

>EU\_Ostreotau tr|Q00UE9|Q00UE9\_OSTTA Cytidylyltransferase family (ISS) OS=Ostreococcus tauri  
GN=Ot16g01010 PE=4 SV=1

MGFPLALDVIVVSVARAIARWRTVLALGVGAVAFKTDHEASINDRAFRTARRARRNFDKFRRRA  
RRLAGTTTETSDDADVTRSDDAQNDVKRSSAGTRRVKTRGLRTNFVLGVAHAPRVDRNGRYEGKP  
LALIHGKPAFARLAETMKRCTRIERVVATDDYRVAETAKEYGIETVLVAPEVARTSTVYAREAATAKAT  
GGGWDYVCVVDVEECLLDADSIDACVCEMETNVDEMCMSSCVTAIDPAGRESGGEERNAECIRP  
RCVEDVNGFAMYISRAAIPVNGEARNGELVDVSTPTKRAIARDFQAWSWGIVEATCFDAVYLRMTG  
NEQKEDTPLSRIENIDALNALERGYKIKVCHVNHQVPPLRDPKDVSKLDELLELRAKVDKLRASMKKS  
PAKKGSRNPSVRPNVGSASEAPSTSGTPAPLTDTP

>EU\_Physcomitrella tr|A9U265|A9U265\_PHYPA Predicted protein OS=Physcomitrella patens subsp. patens  
GN=PHYPADRAFT\_154565 PE=3 SV=1

MGEHGSSSSLAPLLVHAAVAAGAITIAAALNHYWFRARLKRPRVGVIPARFKSSRFEGKPLVHIM  
GKPMIQRTEWQAMKCTSLQAIVVATDDDRIADCCRGFGADVVMTESENQNGTERCNEALEKLA  
YDIVVNIQGDEPLIEPAIIDGIVLALQMCPDAVYSTAVTGLKPEDASDPNRVKCIVDKNGYALYFSRGL  
LPSNKKGIPNPDFPYMLHLGVQCYDAKFLKVYASMPSPPLQLEEDLEQLKVLENGFKLKVIVKDHE  
AHGVDTPGDIAKVEAVMRAHHMD

>EU\_Physcomitrella2 tr|A9RVY8|A9RVY8\_PHYPA Predicted protein (Fragment) OS=Physcomitrella  
patens subsp. patens GN=PHYPADRAFT\_35819 PE=4 SV=1

IPARYKSPRFEGEPLVHISDIPMIQRTEWQAKQFTSLKAVVVAIDDGRIADFYRAFGADVMTSENCLS  
GTERCNEALEKLAAEYDIVVNVQVYQCDASACNWIKNIVDKKGFALYFSRALIPSNKKTLPVFPY  
MRHLGMQCHNAEFLRAYASMPSSLQLEEDLE

>EU\_Picea tr|A9NQZ3|A9NQZ3\_PICSI Putative uncharacterized protein OS=Picea sitchensis PE=2 SV=1

MPESASGSGQCKFWILHGLLAGAAVAATVGFRLVARSNRARNRVVGIIPARFRSTRFEGKPLVEILG  
KPMIQRTEWERAMLAATLDKVVVATDDEKIAECCLGFGADVVMTEPESCRNGTERCNEALRKLKKKY  
DIVVNIQGDEPLIEPEIIDGVVKALQGAPDAVFSTAVTSLNPEDALDPNRVKCVVDKHGYAIYFSRGL  
VPFNKTGKVNPNFPYHLHLGIQSYDAKFLGIYPQLHPTPLQLEEDLEQLKVLENGYKMKVIVKDHE  
AHGVDPSPDIAKIEAFMRERNIS

>EU\_Pongo sp|Q5R6R5|NEUA\_PONAB N-acylneuraminate cytidylyltransferase OS=Pongo abelii  
GN=CMAS PE=2 SV=1

MDSVEKGAATSVSNPRGRPSRGRPPKLQRNSRGGQGRGVEKPPHLAALILARGGSKGIPLKNIKHLA  
GVPLIGWVLRALDLSGAFQSVVWSTDHDEIENVAKQFGAQVHRRSSEVSKDSSTSLDAIIEFLNYHN  
EVDIVGNIQATSPCLHPTDLQKVAEMIREEGYDSVFSVRRHQFRWSEIQKGVREVTEPLNLNPAKRP  
RRQDWDGELYENGFSFYFAKRHLIEMGYLQGGKMAYYEMRAEHSVDIDVDIDWPFAEQRVRLRYGYF  
GKEKLKEIKLLVCNIDGCLTNGHIYVSGDQKEIISYDVKDAIGISLLKKSIEVRLISERACSKQTLSSL  
KLDCCKMEVSVSDKLAVVDEWRKEMGLCWKEVAYLGNEVSDEECLKRVGLSGAPADACSTAQKAV  
GYICKCNGGRGAIREFAEHIFLLMEKVNNSCQK

>EU\_Ricinus tr|B9RU62|B9RU62\_RICCO Cmp-2-keto-3-deoctulosonate (Cmp-kdo) cytidyltransferase,  
putative OS=Ricinus communis GN=RCOM\_1632840 PE=3 SV=1

MSICSSNSSSSSSGSKSWIVHSIVAGAAIIVGIGARAYLSRSRKFRRSRVIGIIPARFASSRFQGKPLVQILG  
KPMIQRTEWERAALATLDHIIIVATDDEKIAECCRGFGADVIMTSESCRNGTERCNEAIGKLEKKYDV  
VVNIQGDEPLIEPEIIDGIVKALQEAPDAVFSTAVTSLKPEDAFDPNRVKCVVDNQGAYAIYFSRGLIPY  
NKSGKINQFPYLLHLGIQSYDAKFLKIYPELQPTPLQLEEDLEQLKVLENGYKMKVIVKDHEAHGV  
DAPEDVEKIERLMREHNVL

>EU\_Ricinus2 tr|B9T7L7|B9T7L7\_RICCO Cmp-2-keto-3-deoctulosonate (Cmp-kdo) cytidyltransferase,  
putative OS=Ricinus communis GN=RCOM\_0282830 PE=3 SV=1



MSSSGSSSTSTKSWIVHSIVAGAAIAVGVGAGAYLGRFRKFRRRVIGIIPARFDSSRFQGKPLVHILGKP  
MIQRTWERAKLATLTDHIIVATDNEKIAECCRGFGADVIMTSESCRNGTERCNEALGKLEKKYDVVV  
NIQGDEPLIEPVIIDGIVKALQAAPNAVVFSTAVTSLKPEDAFDPNRVKCVVDNQGYAIYFSRGLVPYNK  
SGKVNAQFPYLLHLGIQSYDAKFLKIYSELQPTPLQLEEDLEQLKVLNGYKMKVIKVDHEAHGVD  
TPEDIEKIERLMRERNVL

>EU\_Sacco [sko\_genscan] scaffold9909|GENSCAN\_predicted\_peptide\_4|392\_aa  
MDTKRHFAALILARGGSKGIPLKNIKILAGQPLLSWSLRAAIDSKCFDSVWVSTDHDEIARVATEW  
GGQVHRRSADVSRDSSSLDTIKEFALHHPEVDVIGLVQCTSPITHPWMLQEPSAMMRERGFDSVFS  
VTRKHLFRWKPSNTAGELVGADNLDPNRPRRQDWGELYENGQFYMFSRQLLDQGLLQGGKV  
GYFEVGPEYSVDIDSEIDWPAAEQRVTKYGYFGVESKKDIKMVVFDDVDGVTDNQVHINEKGEEFRS  
YNRCDLEGVKQLKETGIIIVRLLSQDTSMAADMKLINEKMGCLLENGAKNKC SVLGK WVDELGLEWS  
QVAYMGNDISDVPAMRKCGLSAAPADARTEARYAARFNATDRGGRGAVRQLCDHIMHLISTK

>EU\_Sacco\_2 [sko\_genscan] scaffold14414|GENSCAN\_predicted\_peptide\_3|924\_aa  
MDNLRDQSHSRKLDNNSIDLYYPSPIGYIFVDFAFNGDLEYTLPAAVISYGLKNATESQLTVDRLSQN  
GIALTIIGAARAVPYSPIQMKYTLCKIVPKCLVVRLQNPYFETMHVTDVFVMSPPKRTRSSVSNIRE  
DKRHFAALICARGGSKGIPLKNIKILAGQPLISWALRAAVDANVYDSI WVSTDHPEIARIASEWGAQI  
HNRNPEAARDTSSAMETILEFTDRHPDIDIISIIQCTSPLIHPWMLQEAVRMIRNEGYSVFGVTRKHL  
FRWTEAKNGAETKAENLDPKNRPRRQDWGELFENGQFYMFTRELLDQGLIQGGKIGYYEMEPQY  
SVDIDTDLDPAAEQRVTKFGYFGTEKRKDIKLSVFDIDGVVTDNQVHITDKGEEFRSYNCSDLGT  
ELLKKAGIEVRFVSEAKNTAGIKVITEKTGCQVETNVKDKLEVLTKWVDEMGLKWSQVTFMGNDV  
SDVPAMRKSGLGAAPADGQTEARYAARFTATNRAYMRVTVVTTIPSTQLINPKIIFNPGCCVVAQN  
NLPLLNVEEKVVLFIHLDQTNLSLTKTNEMSAQTLAAPYTTVQEGDKNKSMSYNERQWHCHSGGTA  
SQTNSLTKTNEMLAQTALAPYTTVQEDDKNKSILYNYPVLKLLNQKLPFGLAEIARCFRKNIHDNS  
DKFLFNLPEFTQMSMQFYSPSVATKWMNVWQRERIIWWRKFAGYPSKFHLTDIKMTETQQTVDIQ  
YEFPWGVDSVEIITNRGDVDLVELERQSGINMQGRYGRKVVTPVVIETTAGLDRGMLAYLLDAYQE  
KERSDTRGKLERKILRLHMKITPIKVVVHPIKNTRELREISEHLAKELRLSGVNTLYVCDAMTLDQ  
HLVRFDEMGPFTVIINEGTLKTGVIGMRSRDTALREQMHITEVKTLLLEHLKKE

>EU\_Sacco\_3 [sko\_genscan] scaffold3004|GENSCAN\_predicted\_peptide\_26|457\_aa  
MNGVILQPKMRKDKRHFAAVIPARGGSKGIRLKNIKLLCGQPLLSWVLRRAIDSNEFDSI WVSTENAD  
IARVAEAWGAQVHHRSPAAQDNTLAVDTMTEFAEHHPVDILAMIQCTSPLLHPWMLHEPVKMIR  
EHKYDSVFAVSRRLFRWKEIQKPGELTPENLNPSYRPNRQAWPGELYENGQFYMFTRELLDKRLF  
QGGKVSYYELPEASSVDIDTDLDSIVEQRVTKFGYFGLEKKKNVCLVVFDVDGVTDDDEIHISDKG  
TVQHKTFPVLVIKVVSLHHVDFDMGFQYLNVS RVKINYSLHISVLLRMLIICSFVFE GEEFCSYHRSD  
LEGIKLLKAGIEVRLTENSNA SVRLISEKIECMLEIGVKNKVELLTKWVEELNLDWQQV TYMGN  
DETDIPAMRKSGLGAAPADAQTETRYAARFIATNRGGRGAVRQFCDYILRLSEK

>EU\_Strongylo tr|Q0E669|Q0E669\_STRPU Putative CMP-sialic acid synthetase OS=Strongylocentrotus  
purpuratus GN=cmas PE=2 SV=1  
MSDSSDSNRKSGHFACLILARGGSKGIKLKNIKALAGQPLIAWVLRRAIDSGEFDSVWVSTDHADIA  
RISKEWGAQVHMRSPTARDQATSIEAMQEFLKEHPEVKFVANVQCTSPCLHPSHLQRTCHMIRNL  
GYDSVFAVNRRLFRWTETPIDQAVSTKAENLDPKRPRRQDWAGELYENG SFYFATRELLMAGLF  
QGGKVG YCEMQPEYSVDIDTDLDPAAEQRVTKFGYFGKTKPQG VKLVVFAADGVLIDNQINFTGTG  
EEVRSFSLSDSIGIKHLREKGV EVRVIADEENAVTTKLAARLGIAMATESKNKVDLLNEWRKGLDLD  
WSQVAYMGQDTPDLDCMKT VIGGAPVDAQNEITTTAKFVAKSKGGKGAGREFCDHLLLVMEKA  
KSA AEDRKI

>EU\_Techamonas [ttrprot] AMMSG\_03137T0 | AMMSG\_03137 | Thecamonas trahens ATCC 50062 3-deoxy-  
manno-octulos  
MNISASVYTA VMRS LARAFTTATVSRATSHAPLHETESSASSALAAALRVVAVIPARAGSTR LPNKP  
LANLTPDLETKWTVIDAVVSAAMDAGELDDVIVATDSPDIAAAAADAAGAHAVLTPADLPTGSDRVH  
HALRQLHASRHPSVRSLAGVVNLQGDEPFVDPHLIDALAAELRAAAAATAHSHASAPDIVTAAVELP  
DGIAPPDLDMVSVVVDHASRALYFSRAALPAAAPHADTASHPSPPPFLAHLGIYGYTLPALDAFVAA  
PRPWIEQREMLEQLRALYLGLHIHVTTTPPNTLFPWPPIAIDTPDDLHRARSWLASRNQPATSGGPA  
PASITS

>EU\_Trichoplax tr|B3SEY8|B3SEY8\_TRIAD Putative uncharacterized protein (Fragment) OS=Trichoplax  
adhaerens GN=TRIADDRAFT\_34782 PE=4 SV=1

MSNLKKSVIIIIPARLAARRLPNKPLIDIEGVPMIIRVYNKALEANIGKVVVAGCNDELRLNLSYNFNY  
ISTDPTLPSGTRVYAAYKNLNEKYDNVINLQGDMPHINSMTIKKVNNDILNDEQDIDIATAASKINDT  
ENDINDINTVKVIKSYQNYALYFTRYVPVRFDENYKHIGIYGFKVNSLEKFCVCLPQSPLEKNEKLEQLR  
ALENGMKIKVAITNDPNISIDTEQDLLKSKNYLK

>MICROMONAS tr|C1EJI1|C1EJI1\_9CHLO Udp-n-acetylglucosamine 2-epimerase/CMP-N-  
acetylneuraminic acid synthetase OS=Micromonas sp. RCC299 GN=MICPUN\_64942 PE=4 SV=1  
MPACPNTADKASLYAPDKCTDMKTTLRRKICVVTNSRSDWSKLKLVAINLRKLCSTQDNQEASDIQ  
VDIICLGSHLLHELGATKNIVKEDFPNAYELHTLVAGDSVESMTDSVGFIVKLTSLLCALKPNIVLVH  
GDRFDAFCAAIAANMLNLTAHVVEGGELSGTVDGTLRHAIKLSHLHFTCTPEAARRIRGMGENPAS  
IFVTGCPSESLFAVSATCWEDEKMDQFFNGTFFKLPNKFILVIMHPVTNDLEESNTLYGSLLSCLFS  
RKTPVMFYPNVDPGNKSMIQTLLHKHQKADPASTSWLRLVTHMPHAKFTALMRHASAMVGNSSA  
GIRESCVFGIPTLNLGSRQEGRRVPANVTTLVKPSIRSIDCWFDNELGKRYAQSTMYGFPSAKRIAH  
HLSRIDTSAGQLKQFWEPRYALLPPLQPRQYVSRQAILADSTSSPTSSPIGRCKILGLITARGGSKGIP  
GKNIIDLNGKPLIQYTIEAALSSKQLDRVILSTDSDEIAEVAQNCGCEVPFRPSELAADDSSHLACIV  
HALNILRETECFVPDFVILQPTSPFRKSIDIDSCINIMLTSSCDMVLVSVCESSLNLKSNFYFAADGTL  
PFAESTAEIDYTPRQKLLKTYAENGAVYVLRQSLLYPPDNAPNVGSFRSADTKGYEMPVERSLDIDN  
PFDLHVARLLMAKPF

## Epimerase-2 alignment, phylip format

114 335

Brancoma1 mKvCvAtCnRaDySkLaPiMfCLrDdMeLrVvVmGtHlIdDyGsTyRmlqQdGfEv-----  
dGyLhTivReGeDeAaMaEsVgLaLvkIPdVIVrLkPDILlvHgDrFdAlSIAtCAaLmNiRiLhleGgEvsgTiDdSiRhSiSkLaHyHaCcTdRa  
RrRILsMcEdnDrILsGcPtYdKILsCnVrnylvAIQhPvTtfEIMiDaViDfGvVtVvLfPnlIdAgSkEmTrTiRkNfSiCkHiPyDqFiIlMaNaGcl  
iGnSsAgIraEaGaFgTpvInLgKrQiGr---EaGaNvLhVkdSkilhAiNIQyKkQfPrFsHiYgdGhAcQrlmKfi  
Brancoma2 MRVCVATCNRADYSKLAPVMFALRDDMELQVVVMGSHLIDDYGSTYRMIQQDEFEV-----  
DGYLHTIVRGEDEASMAESVGLALVKLPDVLVRLKPDLLIVHGDRFDALSLATCAALMNVIRLHIEGGEVSGTIDDSIRHSIT  
KLSHYHACCTDRARRRLLSMCEDNDHILLAGCPTYDKLLSCNAKNFIVALQHPVTTFDLMLDALLEFNVKTLVLFNPIDAGS  
KEMTRMIRPNFSLAKHIPYDQFIILLANTGCLIGNSSAGIREAGAFGTPVINLGNRQIGR---  
EAGENVLHVRDGGKILHAVNLQYQKQFP-CSYIYGDGHAVQRIMKFI  
Danio LRVCVATCNRADYSKLAPIMFGIKSHFDLEVVVLGSHLIDDYGNTFRMIEQDDFDI-----  
GSKLHTIVRGEDEAAMVESVGLALVKLPDVLQRLAPDILLVHGDRFDALALATAAALMNIIRILHLEGGEVSGTIDDSIRHAISK  
LAHYHAVCTLSAERHLISMCEDHSRILLAGCPSYDKLLSAYKRDIYIVALQHPVTTYELMLDALISFNKKTLLILFPNIDAGSKE  
MVRVMRPNFRAVKHVPFDQFIQLVAHAVCMIGNSSCGVREAGAFGTPVINLGTQRQTGR---  
ETGENVLHVRDNKIYHALELQFGKRYP-CSKIYGDGNAVQRILKFL  
Takifugu -----MFGLKSHFELEVVLGSHLIDDYGNTFRMIEQDDFDI-----  
GSKLHTIVRGEDEAAMVESVGLALVKLPDVIQRLHPDILLVHGDRFDALALATAAALMNIIRILHLEGGEVSGTIDDSIRHAISK  
LAHYHACCTRMAEQHLIAMCEDHSRILLAGCPSYDKLLSHQKDYIVALQHPVTTYGLMLDALLSFNKTTLLILFPNIDAGSK  
EMVRVMRPNFRAVKHIPFEQFIQLVNHAGCMIGNSSCGVREAGAFGTPVINLGTQRQTGR---  
ETGENVLHVRDNKIYHALELQFGKRYP-CSKIYGDGNAVPRILKFL  
Tetraodon LRVCVATCNRADYSKLAPIMFGLKSHFELEVVLGSHLIDDYGNTFRMIEQDDFDI-----  
GSKLHTIVRGEDEAAMVESVGLALVKLPDVLQRLHPDILLVHGDRFDALALATAAALMNIIRILHLEGGEVSGTIDDSIRHAIS  
KLAYHACCTRMAEQHLIAMCEDHTRILLAGCPSYDKLLTHHKDYIVALQHPVTTYGLMLDALLSFNKTTLLILFPNIDAGSK  
EMVRVMRPNFRAVKHIPFEQFIQLVCHAGCMIGNSSCGVREAGAYGTPVINLGTQRQTGR---  
ETGENVLHVRDNKIYHALELQFGKRYP-CSKIYGDGNAVPRILKFL  
Gallus LRVCVATCNRADYSKLAPIMFGIKAEFELDVVVVLGSHLIDDYGNTYRMIQDDFDI-----  
HTRLHTIVRGEDEAAMVESVGLALVKLPDVLNRLKPDIMIVHGDRFDALALATSAAALMNIIRILHIEGGEVSGTIDDSIRHAITK  
LAHYHVCCTRSAEQHLIAMCEDHTRILLVGCPSYDKLLSAKNKDYIVALQHPVTTFFELTDALISFNKRTLVLFPNVNDAGSKE  
MVRVMRPNFRAVKHVPFDQFIQLVAHAGCMIGNSSCGVREVGAFGTPVINLGTQRQTGR---  
ETGENVLHVRDDKILHALQLQFGKQYP-CSKIYGDGNAVPRILKFL  
Homo LRVCVATCNRADYSKLAPIMFGIKTEFELDVVVVLGSHLIDDYGNTYRMIQDDFDI-----  
NTRLHTIVRGEDEAAMVESVGLALVKLPDVLNRLKPDIMIVHGDRFDALALATSAAALMNIIRILHIEGGEVSGTIDDSIRHAITK  
LAHYHVCCTRSAEQHLISMCEDHTRILLVGCPSYDKLLSAKNKDYIVALQHPVTTFFELTDALISFNKRTLVLFPNIDAGSKE  
MVRVMRPNFRAVKHVPFDQFIQLVAHAGCMIGNSSCGVREVGAFGTPVINLGTQRQIGR---  
ETGENVLHVRDDKILQALHLQFGKQYP-CSKIYGDGNAVPRILKFL  
Mus LRVCVATCNRADYSKLAPIMFGIKTEFELDVVVVLGSHLIDDYGNTYRMIQDDFDI-----  
NTRLHTIVRGEDEAAMVESVGLALVKLPDVLNRLKPDIMIVHGDRFDALALATSAAALMNIIRILHIEGGEVSGTIDDSIRHAITK  
LAHYHVCCTRSAEQHLISMCEDHTRILLVGCPSYDKLLSAKNKDYIVALQHPVTTFFELTDALISFNKRTLVLFPNIDAGSKE  
MVRVMRPNFRAVKHVPFDQFIQLVAHAGCMIGNSSCGVREVGAFGTPVINLGTQRQIGR---  
ETGENVLHVRDDKILQALHLQFGKQYP-CSKIYGDGNAVPRILKFL

Xenopus LRVCVATCNRADYSKLAPIMFGIKAEFVLSVVVIGSHLIDDYGNTYRMIEQDDFDI-----  
QARLHTIVRGEDEASMVESVGLALVKLPDVLNRLNPDIIVHGDRFDALALATSAAALMNIRILHIEGGEVSGTIDDSIRHSITK  
LAHYHACCTRSAEQHLIAMCEDHDRILLAGCPSYDKLLSVNNKDYIVALQHPVTTTFFETLDALLSFNKKTLILFPNIDAGSKE  
MVRVMRPNFRAVKHVPFEQFIQLVAHAGCMIGNSSCGVREAGAFGTPVINLGRQTGR---  
ETGENVLHVRDNKIIHALQLQFGKRYPC-SKIIYGDGNAVPRIVKFL  
Saccosus2 MRVCVATCNRADYSKLAPIMLGLKEDFQLQVIVMGCHLIDDYGSTYRMIEQDKIKI-----  
DAKLHTIVRGEDEAMVESVGLALVKLPDIFLRLKPDILIVHGDRFDALSTATAAALMNIRIIHIEGGEISGTIDDCIRHSITKLA  
HYHVCCTERARGRLQAMCEDNERILLAGCTSMDLLKSNTKNIYIALQHPVTTTDFDLTLEALLEFGKKTVLLFPNIDAGSKDM  
TRILRPNFSTAKHIPFEFIVLVANACIIIGNSSAGVREAGAFGTPVINLGRQTGR---  
ETGENVMHCRDEKILHALELQYQKQYP-PSYIYGDGHAVSRIIKFM  
Paractus1

YSLMVDALMEFNKRVIIMLPFNIDAGSKDIVRIMRPMFYVPKHIPFEFIIILVANAGCMIGNSSAGVREAGAFGTPVVNLGSR  
QTGR---ETGENVLHCRDQKIHHALEIQYQRQFP-PSYIYGDGHAVPRIIKFL  
Strontus1 FRVCVATTNRADYSKLGIMQAIDDLSTIVLGCHLIDDYGSTYRLIEKDGFTI-----  
DSRLHTIVRGEDEAMVESVGLAMVKLPDILRLKPDVIVHGDRFDVLSLAACAALMNIRIVHVEGGEVSGTIDDSIRHTI  
SKLAHYHVCCTERAKRLLAMCEDNDRILLAGCPSYDKLLSTDVVVDYIVALQHPVTTTYSLMVDALMEFNKRVIIMLPFNIDA  
GSKDIVRIMRPMFYVPKHIPFEFIIILVANAGCMIGNSSAGVREAGAFGTPVVNLGSRQTGR---  
ETGENVLHCRDQKIHHALEIQYQRQFP-PSYIYGDGHAVPRIIKFL  
Saccosus1 IKVCVATSNRADYSKLSPIMIGLRDDFELQVIVTGSHELLDDFGTTIKNIERNIKI-----  
NWKLHTIVRGEDEAMVESVGLSLSKLPDILLYLQPDLLVHGDRFDALALATAAALMNIRIVHVEGGEVSGTIDDSIRHAIT  
KLSHYHLCTEKARARLIAMCEDVDRILLSGCPVYDNLKIDTLTYIISLQHPVTTTFNFAMDALLEFGKKTLLVLPNV DAGSK  
DMTRIIFENFVTAKHIPFEFIVLMANCGCLIGNSSCVVRETCAFGTPVVSLSRQTGR---  
ESGENVFACPDHTILQALELQYQKEYP-RSFLYGDGNSVRRILDFM  
Symssation -KIAVATCNRADYSKLAPVLRGLKQDFQVSIIVMGSHLIDDYGNTYRFIERDGNQI-----  
DSMLHTLVRGETEGAMVESMGLAMIKLPDILNRLQPDIVMVHGDRFDAMSVAISAAMNVRVHLLEGGEVSGTIDDVIRHS  
ITKLAHYHICCTKGARLRISMCEDESSRVLLAGCPAYDELIDTDSKFIICVYHPVTTTGLLLDALVHFDVTRVILFPNV DAGS  
KELVRCIREKISCYKHVPFSEFVYLMGNCGLMIGNSSAGIRESNVFGTAVINIGTRQRGR---  
QSGANVVHVKNEDLLWHIRSQFGKVYP-RDYIYGDGRAVERIVKFI  
B\_DELTA -KLCLVITTRGNAYKVKSIQAAENDVELQIIVGGGAILAKYGNIAADSLTMMGVNV-----  
DRRIHFLVEGETPVTMAKSAGLAVSEFTAFENLQPDVMMVIADRFECLSIAMTASYMNIPVAHMEGGEVSGSIDESIRHAI  
TKLSHVHFPATQEAADRIRMGEAPETVFPVGTSLDVIAGLDLDNYLTVIQHPVTTVNQTLNAIHELGMGTIWIWPNMDAG  
SDGISKIRAPMHFFKSLPIEHYAPLLKNAQAIVGNSSSGIREAAFLGTPCVNIGSRQSGR---  
DRSVNIIDVGYAEIKAAIQQLDHGRYEENHMWGDGKAGPKILDVL  
B\_ALPHA RKICVVVGSRRANYSSIKSAMRAIQDHLELQLIVAASAVLDRYGSVNLIEKDGFRP-----  
HARVTMLIEGETPATAKSTGLGLIELPTLFEQLGPDVVLTVGDRFETMATTLAAAYMNIPVAHTMGGEVSGTIDESIRHAV  
TKFAHIHFASQGAARAIKLGELPRHVHMVGCPRIDLVAEILGRSFALVSOHPVTTITLLEAVREQGLAAIVLWPNADAGSD  
DISRGIRDRMHFFKNLPIETYVNLMRSAACLVGNSSSGIREGAYIGTPVNVNIGTRQHMR---  
DRGDNVIDVGYKQISDAIARQVEHGRYAMDPIYGDGTAGTKIADIL  
B\_DELTA\_2 RRICVVTGTRADYGLLYRLMKEIEGDLQLQVATGMHLSPEFGLTYRDIETDGFTI-----  
HERVEMLLSSDTPVGIAGSIGLGVIGFADAFERLRPEIIVLLGDRFEMLAAAQAALVGRIPVAHIAGGDTTGAFDEAIRHSITK  
MSHCHFVTNEAALHRVRQLGENPDAVHLVGSPPIDQIRRLTLLSNLLVTFHPATLMQALFDALDRLGVGIILTKPNADTGG  
RLSDMIDDQAKAFTSLGQLRYLSLIPQVDAVGNSSSGIIEAPSFKKPTVNIGDRQKGR---  
LQASSVINCAFDILQAVRAAFGLDCSTAVNPNYGDGNASSRIAAIL  
B\_CYAERIA RKICVVTGTRADYGLLRWVIDGISKSLQLQIVATGMHLSHEFGLTFKEIENDGYNI-----  
DLKVEMLLSSDSSVGTIKSIGLGIIFADAFKELNPDIVLLGDRFEIFAATAALISKIPVAHCHGGETTGAFDESIRHSITKM  
SHLHFVAAREYQERVLQGEDPENVHLVGGGLGIDNIKKLSLLDNYLVTFHPVTLITELLRALSNLVGTIIFTMPNSDTGSRPL  
MNLINYEASSYTSLGQIKYLSLKYVDVAVGNSSSGIIEAPTFTKATINIGDRQKGR---  
LMASSVINCDPISIGNAINHLNSHAFKQTVNPNNGSGGSADKIIKVL  
B\_SPIES\_5 RKICVITGTRADYGLLRWLILEISKSLDLQIIATGMHLSPEFGLTYKEIENDGFLLI-----  
HKKIEILLSSDSTVGVSKSIGLGLIFSEAFADLNPDIIIVLGDREIFAATVAALISRIPVAHLHGGETTGAFDEGIRHSITKMS  
HLHFVAANEYRNRIQLGEDPSNVFLVGGMGIDGIKSNLLKNLLITFHPVTLMIELLLSLETLSIGLIFTMPNADTDGRIIFELV  
KSNAWYFTSLGQTRYLSCLQFVDAVGNSSSGIIEAPSFKIGTINIGDRQKGR---  
LRAKSIIDCEPIEIDAFKRLYSSDFQKTVPNYPYEGGASEKIVRIL  
B\_AQUICAE -----FTGTRAEYGLLKPLMYEIKKDLLELQIIASGMHLSPEFGLTYKEIEKDGFTI-----  
DEKVEMLLSSDTPFGISKSIGLGVIGYTDALERLKPDIIVLGDREIFAALFVIASFTLKIPIAHLYGGETTGVLDEGYRHAITKL  
SYLHFTSTEEYKRVIQLGEEPERVFNVGALGIDNIKKLKNLLITFHPETLKFELLKALDELETLIFTKANADTEGRKINY  
LIDEKTVVFTNMGQLLYLSTMQFVDAVGNSSSGIIEAPSFKIGTINIGDRQKGR---  
IRAESIIDCKPESIKKSINKLFSQNFQVNNPYENKNTARKIKNIL  
B\_EPSON\_2 KNICVVTSTRAEYGLLYWLMKEIENDLQLQIVTGSHELLDDFGTTIKNIERNIKI-----  
DKKIEMLLSSDSSKIGISKSMGLLQISIAEAFEELKPDFLVVLGDREYELIPIVSTAVFNIPVVHLHGGEITGAIDEYFRHAVTKM  
SYLHFTSTEEYKRVIQMGEEPFRVFNVGAFGVENIFRLKLLNLLITYHPETLKFELDLVDELKTNFIFTKANSNTNGRIIN  
KMIDNKAISFDSLQIRYLSALKHVDVAVGNSSSGIIEAPSFKTATINIGNRQKGR---  
IKAKSIIDCEPESIKKAFEKLYSKEFQEVKNPYQEKYPSKKVVDVL  
B\_GAMMA\_7 RKISVVTATRAEYGLLRGLLEDINAALQLIVTGTLSPEFGLTLRQIEEDGFCCI-----  
NKKVEILLSSDSTAVGVSKSMGLALISFAEVFDELKPDILVVLGDREYELIPIVSAANIARIPVAHLSGGELTGAIDELIRHSVTKM  
QLHFHTAMEYSRRVVMGELPSRVFTVGEIGLDNLKRIQLSSNLLITYHPETLKFELILKALDQLDILLIFTNANSVGGGRSV  
NMMIDEKSIATSLGVKRYLSALQYVDAVGNSSSGIIEAPSFKTATINIGNRQKGR---  
VRASSVDVDVEQILKALEIYSSDFKATVPNYPYKGDVSVQKVIIVL

B\_DELTA\_4 LKICIVTGSRAEYGLLYWLLKDIAADLKLQIIATGMHLSPEFGTYRQIEVDGFTI----  
DAKVEMLLSADTPVAVTKSMGLGVIGFADALDRAPDIIIVLGDREIFAQAAMVARIPLAHIHGGGETSGAYDEGIRHAISK  
MAQWHFVATEPYRQRVVQLGEAPQRVFNVGAPGLDHLSTRQQLTLFVVTYHPVTLMKELIAGLRKFEASIVFTYPNADSG  
GRALRQIINQRIRAYTSLGQQRYLSLRQADVIVGNSSSGLIEAPALKTATVNIQDRQKGR---  
LKASSVIDASETDIAKAIRHALSPEFRITQSLYGCSDASASILRQL  
B\_ALPHA\_4 KRICVVTGTRAEGPLFWVLKEIDAHLELQVVVTGMHLSPEYGSTWKTIEADGFAI----  
AAKVEMLLSGDTGVAIAKSMGLGTIGFADAFERLKPDIIVVWGDRELFELMAAVQAAVARIPIAHIGGGDVTGAFDDAIRHAI  
SKMAHLHFPIIADSARRLRQLGEDPERIHLTGNASLDHLRRTIFLENLVTYHPVTLWAEMLALESGLVGVIMTAPNADND  
SRELMVALEPNAILRTSLGSLYMLSTARLCDAVVGNSSSGLLEIPSLGVATVNIQTRQKGR---  
PRADSVIDCPPAAIRAAMDRAAMDCSAVVNPYGDGQSARRIVQVL  
B\_DELTA\_6 RRICVLSGTRADYGLLYWLMKELQTYVDLQIIATGMHLSPEFGMTYKFIADGFLI----  
NEKVEMLLSGDSVTALCKSMGLGVMGISEALARLSPDLLVVLGDRFEALAGAQAAMIHRIPIAHLHGGEATGLIDEAIRHSIT  
KMSHLHFVAAEAYRNKVIQLGESPDVFNFGATGIDNIKRLPLFNVFLVTYHPVTLMDLLSAIEEFSACVILTKSNADTAGR  
VINEMIDERAMSSVSLGQKLYLSVMSIANVVVGNSSSGLIEAPAMNIPTVNIQPRQQGR---  
AKAPSVLDCNESEIVSGIQTVLENSFMADKHVYGDGNTAVKVAEVL  
B\_EPSILON RKICIVSATRAEWYLLRNLCLEIQNDLELQIIATGAHLSPEFGTYKEIEKE-FKI----  
AKKIPILLASDDKISLCKAMALANIGFSEAFESLKPDIIVVILGDRYEMLSVASVCLMMNLPVIAHLGGELTGAIDDSIRHSISKM  
AHLHFVSTQTYKNRLLQLGEEKNRVFNVGSLASTIMKNINFLDIYLITYHPVTLIDILLKTDELNASLIFTKANADENGLLINEI  
LKKKAKLFDNLGSQKYLKIMKIAKAMIGNSSSGLIESEPFKTPCINIGSRQKGR---  
LRTQNIIDCFENLDQAFEKLESKDFKQFKNPYENDKPNPIIIKT  
B\_FIRES\_2 RKIAVITGTRADYGIYYSVLKAIENHLELHLIVCGMHLSPEFGMTINEIEKDGFKI----  
DDKIDTILSSDSGEAMAKSIGITLMGLTQSLDRIPDVLILLGDRGEMMAGALAAIHMNIPVAHIHGGGEVTVDESIRHSITK  
LSHIHFANEDSRERIIKMGEKKNVYVVGAPGIDYIKNTEYLSIFILTQHPVTTIETLSAIAELGVQTIISYPNSDNGGREIHK  
VIEDFLKVFKNLSQVEYLSLLNTADIMIGNSSSGLIEAPSFKLPVINIGTRQQGR---  
LRACNIIDVSYKEILSAIDKVLVNEEFKCNENPYGDGHSGERIADIL  
B\_FIRES\_3 RKIAVITGTRADYGIYYSVLKAIENHLELHLIVCGMHLSPEFGMTIEEIQKDGFKI----  
DDKIDTILSSDSGSAMAKSIGITLMGLTQSLERINPDILLGDRGEMMAGALAAVHMNIPVAHIHGGGEVTVDESIRHSITK  
SHIHFANEDSKRRIIKMGEKKNVYVVGAPGIDYIKNTKYLIFIMTQHPVTTIETLSAIAKLVQTIISYPNSDNGGREIHK  
IEDFLKVFKNLSQVEYLSLLNTADVMIGNSSSGLIEAPSFKLPVNIQTRQQGR---  
LRACNIVDISYKEILDAIDKVLVDEEFCENPYGDGKAGERIADIL  
A\_EURY RKIAVITGTRADYGIYLPVLKAIQRSLDLSLIVTGMHLSETFGHTVDEIEKDGFSI----  
DAKIPLGLEDGSMALDVGICILGLTDALKKIKPDILLGDRGEMLATTIAGIYMNIPVAHLHGGEVSGTVDESIRHAITKL  
SHIHFATEESAERIRNLGEDEFRIYVVGAPALDITLSETFVPIILVYQHPVTTIETMDAVVELGEQTVVIYPNADAGGRKIE  
TIEAFIKIFKNIRHVDYLSMRTTNVMVGNSSSGLIEAPSFGLPVVNIQTRQTR---  
QRGQNTIDVDYDEIIEIKVGLYDKDFKICISPYGNHGAGTAIAEIL  
A\_EURY\_2 RKILVLTGTRAEGLLRSSMEAIQNHLLSIVATGMHLSPPQHGTMVEKIREDFSI----  
DREVLMLQSGDSETAMAKSLGIGETASLADAFESLDPDVLVLLGDRDEALAGALAAASHMNIPVAHVHGGDSAAAMIDESIRHA  
ITKFSHIHFASERISAERIKLGEESWRITAGAPGLDDILAGEYEDLLMVLQHPVTTMAATLDAVESTEQAQAVIYPNSDAGS  
NQMIDEIEADVTRFRNMPRKEYLGLMAATDVMVGNSSSGLIEAPSFGLPVVDIGPRQRGR---  
ERTQNTFSAEHEQIREKIYQCLNEGVLDDQNPYDYGGAGSRICERI  
A\_EURY\_3 KKVAVVTGTRAEGILKPLIEKINDLELQMLMVTGMHLLKFKGYSIKEIENDGFPI----  
ASKIRMYDEDSLGSYHGVSLGRAVSEFTREFVYLNPDIVLVIGDRLEALAPVLSASTLNIPIGHIHAGDSTGHIDEQIRFAISR  
FSHLLFAPTEKCVERTKMGEEPWRAYNVGALGLDSILSYKPLTVAIIHFVPIHIESIMKAVIETKINTVVIYPNNDLGSKKIIEI  
KENIKLFENLEHNIYISLMYHANLMIGNSSSGLIEAPSLGLPVINVGSRNTGR---  
EHGDNVLFVKPKEIVEAINKALYDIDFIKNNPWGDGKTSERLVNLI  
B\_GAMMA\_9 RKIIYVTGTRADYGLMREVLKRLHQSIDLSICVTGMHLDALYGNTVNEIKADQFSI----  
CGIIPVDLANAQHSSMAKAIGHELLGFTEVFSETPDVLVLLGDRGEMLAIAAIAIHLNIPVHLHGGERSGTVDEMVRHAI  
SKLSHYHFVATEASKQRLIRMGEKEETIFQVGAPGLDEIMQYKTSTICLLIYHPVVQFQSVIQAALATNLQIICLEPNSDTGG  
HLIREVIQPDVRIIHLHRPEFIDCLANSYDMLGNSSSGLIEAASFNLNVVNVGSRQNLR---  
ERSDNVIDVDVDAITGLREALNKPKIKIYFNKYGDGKTSERCYQLL  
EU\_Rinus RKICVFTGTRAEGYLLRPLMQAIATRATLQTLVTGAHLAESTGATWREIANDGLPI----  
DERVEVLLDGGGDESICTSIGLGMRYAEALKRLAPDMLVILGDRYEIAAAVAATVCKVPIAHIHGGELTGAMDDAFRHSIT  
KMSYLHFTSTEAYRKRVIQLGEQPARAHNVGALGVENIRTLNLYDYLLVTFHPATLLKALLNALDAFPHVCVFTGANADPG  
GAGLNRLLA-----  
B\_ALPHA\_2 KRIVYLTGTRADFLMLPTLRAIDRSLELELLVTGMHLSDRFGRTEREVEAAGLKI----  
GRRIPVPIDDDSGHGMGVSTGLITCAVADYLAETACDVLLLLGDRGEMLAATAAGLAFADVPIVHVAGDRSGSVDESIRHAI  
SKLAHIHCVSNEDARQRLIRMGEDPDRIFDVGAPGLVGLKPKDRATFVLVLFHPVVQWRAMFDALAGLPFRYVALMPNAD  
HGTTISRTEIEGQLTTIDHMPRADYLALLAEACRFLIGNSSSGLIEAATFGTPVVNVGDRQFGR---  
LRSANVFDAPPGAIGRAIEKAIGFDPQGLRNVYGDPHADIRICEIL  
B\_ALPHA\_3 REILFVTGTRADFGKIEPLALAARDRFKVSFLVTGMHMLDRYGLTKIEVHRVQ-----  
GATVHEFLNQREGDPQDITLAKSIIGFSDIFAEALRPDLVVFHGDRIEALACALVCATNYIRSAHIEGGEVSGTIDEVFRHCNTK  
LAACHFVSSEAAAKRVMTLGEPADRIHVIGSPELDFHARPSGVTYGVTLFHPVTSAADLFGALEASGRNFVVIAPNNDPGS  
REIFAVLE-RFRLIPSMRFAHFSELMKHAACLGNSSAGVREAPFLGIPSLDIGTRQTRN---  
AEAPSLFSADAREKIAAFLATEWVKRYPPHTAFGEGRAERFLEVL  
B\_CYAIA\_4 KVLLFVTGTRADFGKMEPLAREAFNNFKVIFVVTGMHMMREYGLTKEEVHKNK-----  
DIQIFEFNSQKYGDKLDITLNTVRFGSNYVKEINPDIVIIHGDRIEAIACSLVCSTNNIISAHIEGGEVSGTIDEVFRHCNTKLC  
TFHLVSSNEAKKRVQRQMEPEKNIFVIGSPELDIHGRKSGVDYGCIFHPVTTAENLFKSLISNRNFVILPNDPFGSIYICN  
EID-NFRIPSMRFAHFSELMKNSLIIGNSSAGVREAPFLGIMSINIGTRQNK---ALTQSIYNCSGPEIVDAIGKFWNKKT-  
SHKGFSGNSRKKFLKI

B\_FIRUTES RKILFITGRADYGKIKPLMRKVEESFELHIFVTGMHMSKYGSTWKEIEKDF-----  
KNIYKFQNFHMDIALSNTIIGLSNFVNLRPDMIVVHGDRLEALAGAIVGAFNNIRVAHIEGGEVSGTIDESIRHAITKFS  
HIHFVCNEEAKKRVIQLGEKPESVYVIGSPDIDVMSDTPSYAIFYHPVTTIKEVIDALIESGKNYVVIYPNNDEGSNIILKEY  
EKRFKIFPSLRFEYFLTLKHADFMIGNSSAGIREAGIYGVRRVIDIGIRQKGRYDISKFKNIIHVNEEELKAIQKVQLVDFK-  
YISAFGDGKSAERFINIL  
B\_BACES\_9 KKILFLTGRADFGKIKSLIQILEAHFEPYIFVTGMHLQEEYGYTFLEVRQCGF-----  
RNIHTFQNHHTETMDLTLAKTITGLSAYVKDCQPDMMIVHGDRVEALAGAIVGSLNINLVSHIEGGEVSGTIDELIRHATSKM  
SHIHFVSNDAQKRLLQMGELHESIFIIGSPDVIDMFSKSLPDYAVVMFHPVTTANDFVHVLLADTHNYVVVFPNNDLGS  
IIQAYEKFRVFPVSLRFEYFLTLKNAQFIIGNSSAGIREAPYGLPIINIGTRQQNR---  
AAHTHIINVDYLHIQEALSSIDSHKVQPSKNDFFGQNSAKLFLASL  
B\_DELA\_11  
KKILFITGRADFGKLCSLIDKVSEHFEYCFIVTGMHTLSRYGYTVDEVMKKYSSFRLEGGFRNVHVFMMNVHGESMDMV  
LGNTIFGLSRYVSEYQPDMMIVVHGDRVEALAGSIVGSLRNILVAHVEGGELSGTIDELIRHAVSKMAHLHFVANGDSRRRLM  
QMGEAEETIYPIGSPDVLMSFNLPYSYAITLLHPVTTAGAVVDMALDSDDNVYIYVPPNNDHGSDIILDEYDGRIAVYPSLRV  
ESFLVLLRAAKYLLGNSSAGIRETPCYGVPSINIGSRQDGR---  
FCCSSIINVPGDAIVKALADVRKMPVPHPPREFEFGGNSAEQFIKIL  
B\_BETA KRILCITGRADFGKLPKLLAYIENHLEHLIVTGMHMMKTYGRTYKEVTRENY-----  
QHTYLFNSQIQGEPMGAVLGNTITFISRLSDEIEPDMVMIHGDRLEALAGAAVGALSSRLVCHIEGGELSGTVDDSI  
RHSISKLSHIHLVANEQAVTRLVQMGEKRRKHIHIGSPDLDMASSTLPSYGISMFMHPVTTAAQYFKALELSGQNI  
SIYPNNDTGTESILQELL-KFIAFPSIRFEYFLVLLKHAKFMVGNSSAGIREAPLYGVPSIDVGTQRQSNR---  
HMGKSIHTDYKNIFDAIQQACSLGKFEADDTFNGGDSTERFAEVI  
B\_BETA\_2 KRILCITGRADFGKLPKLLAYIENHLEHLIVTGMHMMKTYGRTYKEVTRENY-----  
QHTYLFNSQIQGEPMGAVLGNTITFISRLSDEIEPDMVMIHGDRLEALAGAAVGALSSRLVCHIEGGELSGTVDDSI  
RHSISKLSHIHLVANEQAVTRLVQMGEKRRKHIHIGSPDLDMASSTLPSYGISMFMHPVTTAAQYFKALELSGQNI  
SIYPNNDTGTESILQELL-KFIAFPSIRFEYFLVLLKHAKFMVGNSSAGIREAPLYGVPSIDVGTQRQSNR---  
HMGKSIHTDYKNIFDAIQQACSLGKFEADDTFNGGDSTERFAEVI  
B\_BETA\_3 KRILCITGRADFGKLPKLLAYIENHLEHLIVTGMHMMKTYGRTYKEVTRENY-----  
QHTYLFNSQIQGEPMGAVLGNTITLISRLSDEIEPDMVMIHGDRLEALAGATVGALSSRLVCHIEGGELSGTVDDSI  
RHSISKLSHIHLVANEQAVTRLVQMGEKRRKHIHIGSPDLDMASSTLPSYGISMFMHPVTTAAQYFKALELSGQNI  
SIYPNNDTGTESILQELL-KFIAFPSIRFEYFLVLLKHAKFMVGNSSAGIREAPLYGVPSINVGTRQSNR---  
HMGKSIHTDYKNIFDAIQQACSLGKFEADDTFNGGDSTERFAEVI  
EU\_Mionas RKICVLTNSRSDWSKLKLVAINLRKLIQVDIICLGSHELLGAT-KNIVKEDFPN----  
AYELHTLVAGDSVESMTDSVGFVIVKLTSLCALKPNIVLVHGDRDFAFCAAAANMLNLTAHVHVEGGELSGTV  
DGTLRHAITKLSHLHFTCTPEAARRIRGMGENPASIFVTGCPSESLFAVSATWVILVIMHPVTNYGSLLSCLFSRKTPTVMFY  
PNVDPGNKSMIQLTSHWLRLVTHMPHAKFTALMRHASAMVGNSSAGIRESCVFGIPTLNLGSRQEGR---  
RVPANVTTLVKRSIDCWFDNELGKRYA-QSTMYGFPSAKRIAHL  
B\_BACETES LRLLIIVGTRPEIIRLAAVINKCRRYFDCILAHTGQNYDYNLNGVFF----HDLGLQAP--DVYMDA----  
VGDDL GSTMGNILNASYKLMShLRPDAVLVLDGTDNSCLS-  
VISAKRHLPIFHFMEAGNRCCLEPEETNRRIVDIISDMNLCYSEHARRYLNASGVAKERTYVTGSPMAEVLSENLSAEYILLSA  
HREENFASLFEGINAMAYDMPVLYSCHPRSRNRLESSGFSRVIRHAPLGFHDYNCLQMAYAVVSDSGTLPEESSFFSFP  
AVCIRTSTERPEALDKGCFILAGIDASLLQAVDTAVEMNRNGPVPDYMDRNVSTKVVKLI  
B\_BACES\_7 LRLLIIVGTRPEIIRLAAVINKCRRYFDCILAHTGQNYDYNLNGVFF----HDLGLQAP--DVYMDA----  
VGDDL GSTMGNILNASYKLMShLRPDAVLVLDGTDNSCLS-  
VISAKRHLPIFHFMEAGNRCCLEPEETNRRIVDIISDMNLCYSEHARRYLNASGVAKERTYVTGSPMAEVLSENLSAEYILLSA  
HREENFASLFEGINAMAYDMPVLYSCHPRSRNRLESSGFSRVIRHAPLGFHDYNCLQMAYAVVSDSGTLPEESSFFSFP  
AVCIRTSTERPEALDKGCFILAGIDVSLQAVDTAVEMNRNGPVPDYMDRNVSTKVVKLI  
B\_BACES\_2 LKVM TIVGTRPEIIRLSRVMAELDKYTEHIMVHTGQNFYELNEIFF----QELRIRKP--DYFLDA----  
AGKNAETIANVIRKSDELMDQVKPDALLYGDTNSCIS-  
VISAKRRKIPIHFMEAGNRVPEEINRKIVDHLSDINMPLSEHARKYLLAEGLRPETVIKIGSPMTEVLIYHKAEEYFVSTH  
REENFDLSSLNAIVYHKKVIVSTHPRTRKRLEDKFKEPLITFLKPFGFFDYVQLQMSAFILSDSGTITEEASLLDLP  
AVTIRNTHERPGEIMDVGTLMISGLSERILESVRIVVDYRAGVDDYSAGQVSKKIVSIV  
B\_SPIES\_3 FKVM TIVGTRPELIKMSRVIAELDRNFKHILVHSGQNYDYELNQVFF----EDLEIRKP--DHFLNA----  
AGESAAATIAQVLLKADEVFEKEKPDALLYGDTNTCLA-  
VISAKRRKIPIHFMEAGNRVPEELNRKVVVDHLSINLVTEHARRYLLAEGIKPETIIGTSHMDEVLYKYYAKEEFFIVSSH  
REENLKKLLESNAICYGLPVIVSTHPRTRKRLEDKFKEPLITFLKPFGFFDYVQLQMSAFILSDSGTITEEASLLDLP  
AVTIRNTHERPGEIMDVGTLMISGLSERILESVRIVVDYRAGVDDYSAGQVSKKIVSIV  
B\_ALPHA\_7 LKVM TIVGTRPELIKCCVISEFDKYTHHILVHTGQNYAYELHQVFF----DDMGIRKP--DYFLEV----  
AADNTAKSIGLIIKVDVAVLEKEKPDALVLYGDTNSCLS-  
AIAAKRRKIPIHFMEAGNRVPEEINRKIIDHISDVNITLTHARRYLLAEGIKPETIIGTSHMDEVLYKYYAKEEFFIVSSH  
REENLKKLLESNAICYGLPVIVSTHPRTRKRLEDKFKEPLITFLKPFGFFDYVQLQMSAFILSDSGTITEEASLLDLP  
AVTIRNTHERPGEIMDVGTLMISGLSERILESVRIVVDYRAGVDDYSAGQVSKKIVSIV  
HERPEGMADAGTLIMSGFKERVLQSVKAITEEHENNIVPDYAAGLVSKKILRIV  
EU\_Rius\_2 -----  
MEAGNRVPEELNRKIVLDHLSINMVLTEHARRYLLAEGIPADRIIKTGSHMQEVLEYMPNEYFLLSTHREENLQDILLD  
TLQALVYDMPVVVSTHPRTRQRLEKLVNRIHFLKPFGFFDYIKLQKEAFCILSDSGTITEEASLLNLSAVTIRNAHERPE  
G MDEGTLIMCGLKERVLDVAVNIVTHQHKKTIVPDYLGGLVSRK-----  
B\_BACES\_6 LKVM TIVGTRPEIIRLSRVLMALDESIEHIVHTGQNYDYELNQIFF----EDLGLRKP--DYFLEA----  
AGKTATEVGNILIKIDPILLEQLQPDAFLVLDGTDNSCLS-  
AIPAKRRKIPIHFMEAGNRVPEEINRKIVDHTSDVNLTYSDIAREYLLREGLPADRIIKTGSPMFEVLHHPYLPQKYFVSS  
HREENFKGLIESLNLIAYNYPIIVSTHPRTRNMIDKMKVPEVQFLKPLGFHDYNALQMRSAVLSDSGTISEESSTLNFRALN  
IRDAHERPEAMEEASVMVGLSERIMQGLVQLQSQEIGESVADYSMPNVSQKIVSIV

B\_DELTA\_8 MKVMTVLGTRPEIIRLSRVLAKLDQHCHEKIVHTGQNYDFELNEIFF----QDLGVRKP--DFFLNA----  
AGESATETIGNIIKTVDKVMGEFLPEAVLVLGDTNSCLS-  
VIAAKRRKVPFHMEAGNRCRVPEETNRKIVDHTADINLTYSSIAREYLLREGLPPDRVIKTGSPMFVLTHTYRKQDYFVVS  
AHREENFDKLVESLNLVAFDIPVVVSTHPRTQNRIDKRGSSNVRLKPLGFSDYNHLQLHARAVLSDSGTITEESSIMNFPA  
LNIREAHERPEGFEEASVMMVGLDIRIMQALRILETQPRADQVADYSMPNVSDKVVRII  
B\_SPIETES LKVSTIIGTRPEIIRLSRVLAKLDQYCDHIMIHTGQNYDYELNEIFF----NDLEIRKP--DYFLNA----  
AGTSGAATIGNVIIKVDELLAQVQPDVAVLVLGDTNSCMA-  
VIPAKRRKIPIFHMEAGNRCRVPEEINRRIVDHTADINLTYSSIAREYLLREGLPDSMVIKTGSPMFVLTHTYRKQDYFVVS  
HREENFAKLIDIINTIAFKFPVIISTHPRTQKKINVSAPLVQLLKPLGFKDYNNKLQLSAKAVLSDSGTITEESSILNFPALNIRE  
AHERPEGMEEASVMMVGLEERVQLVQILEKQPKGENVSDYSMPNVSEKVVRII  
B\_SPIES\_2 LKVSTIIGTRPEIIRLSRVLAKLDQYCDHIMIHTGQNYDYELNEIFF----NDLEIRKP--DYFLNA----  
AGTSGAATIGNVIIKVDELLAQVQPDVAVLVLGDTNSCMA-  
VIPAKRRKIPIFHMEAGNRCRVPEEINRRIVDHTADINLTYSSIAREYLLREGLPDSMVIKTGSPMFVLTHTYRKQDYFVVS  
HREENFAKLIDIINTIAFKFPVIISTHPRTQKKINVSAPLVQLLKPLGFKDYNNKLQLSAKAVLSDSGTITEESSILNFPALNIRE  
AHERPEGMEEASVMMVGLEERVQLVQILEKQPKDENVSDYSMPNVSEKVVRII  
B\_SPIES\_4 LKVSTIIGTRPEIIRLSRVLAKLDQYCDHIMIHTGQNYDYELNEIFF----NDLEIRKP--DYFLNA----  
AGTSGAATIGNVIIKVDELLAQVQPDVAVLVLGDTNSCMA-  
VIPAKRRKIPIFHMEAGNRCRVPEEINRRIVDHTADINLTYSSIAREYLLREGLPDSMVIKTGSPMFVLTHTYRKQDYFVVS  
HREENFAKLIDIINTIAFKFPVIISTHPRTQKKINVSAPLVQLLKPLGFKDYNNKLQLSAKAVLSDSGTITEESSILNFPALNIRE  
AHERPEGMEEASVMMVGLEERVQLVQILEKQPKDENVSDYSMPNVSEKVVRII  
B\_GAMMA\_8 LKVMTVVGTRPEIIRLSRVIVACDKHFQHILVHTGQNYDYELNEVFF----HDLGIRKP--DYFLNA----  
AGKTSATIGNVIAVDQLEETQPEALLVLGDTNSCLA-  
VLPKRRKIPTFHMEAGNRCRVPEEINRRIVDHTADINLTYSTIARDYLLAEGSPDLIIKTGSPMFVLTHTYRKQDYFVVS  
HREENFLDLIHTLNAVAYQYPVIVSTHPRTQKRIEELNIPLIQLLQPLGFKDYNNKLQLMAKATLSDSGTINEESSILNFPALNLR  
QAHERPEGMEEAAVMLVGLQERVLQGLAILDEQRRGQLVADYSMPNVSAKVIRIL  
EU\_Enzoon LKVTVVGTTRPEIIRLSRVMAELDKHCDHILVHTGQNYDYELNEIFF----RDLGIRTP--DYFLNA----  
AGVSGAQTIGNVIAVDRLVLEDKPEALLVLGDTNSCMA-  
VIPAKRRRIPTFHMEAGNRCRVPEEINRRIVDHTADINLTYSSIARDYLLREGLPPDMVIKTGSPMFVLTHTYRKQDYFVVS  
-----  
B\_ZETA MKVVTVVGTRPEIIRLSRVIACLDRSVDHKLVTGQNYDYELNEIFF----QEMGIRKP--DYFLNA----  
VGASPVQTIGRILETIDPVLEQEAPDAMLLLGDNTNSCLA-  
VIAAKRRKIPIFHMEAGNRCRVPEESNRKLVLDHLSINMPYSSHAREYLLREGLPADRIIKTGSPMHEVLHHYSGNEYFVVS  
CHREENIRRFVHVLNLSLAYDRKIIVSTHPRTQKRIEELNIPLIQLLQPLGFKDYNNKLQLMAKATLSDSGTINEESSILNFPAL  
NIREAHERPEGMEEGSVMMVGLDAQILQALSILETQQRGEQVADYAPLNVSEKVVRII  
B\_ACTIA\_5 ARVMILVGTTRPEIVKLSRIIAALERAADVCLVHSGQHYYDYELNQVFF----DELGIRKP--DHFLDA----  
VGASAAETIGRVIARSDAVFVDESPDALLYGDTNTTLA-  
VIAARRRHIPVHFHLEAGNRCRVPEEINRRIVDHTADINLTYSTIARDYLLAEGSPDLIIKTGSPMKEVLHDYAPLDFLVVSA  
HREENLIGLETLNALAYRVPVIVSTHPRTQKRIEELNIPLIQLLQPLGFKDYNNKLQLMAKATLSDSGTINEESSILNFPALNLR  
REAHERPEGVDHGVAVSCLPRVDRVLAADVLDVDAAG-IVPDYDVEDVSRVRII  
B\_BACES\_4 MKITIVAGARPNFMKIAPIITRAIDAAISYRLVYTGVDNLSLDAASF----ADLHMKAP--DAYLGV----  
NGNNTPTELTAGIMIAFERELTENPHVVLVDDLTATMSCAIVAKKQNIKVAHLVAGTRSSMPKEINRMITDGLSDYLFTAGM  
VANRNLNQTGTENETVYVGNILIDTIRYNRNRIYLLTLNRHVLLQELMETLLKKA--  
MPIVAPLHTYVRDAIKALGIPNLHIMPTQSYLSFGYLMNQAKAIVTDSGNVAEEATFLGIPCITLNTFAEHPETWRTGTNELV  
GEDAALGACMDKLMNGEWEKQTLPERWDGRTAERIVQIL  
B\_ACIA\_2 -HFLHVVGARPNFMKIAPIITRAIDAAISYRLVYTGVDNLSLDAASF----ADLHMKAP--DAYLGV----  
GSGSHAQQTAAIMSRVEPVLNQRPDVAVVYGDINSTVAVALVCAKLGKILHVEAGLRSSMPEEINRLVTDQLADVLFPTSL  
DGDENLHREGIPDNKVHVFVGNIMIDTLVRLPLEFGLVTLHRPSNLAPLLFALDRIA--  
LPLLFVHPRTLQHMQEFSEIHLQILEPLPYIDFLSLQRAALVITDSGGIQEETTYLGPCLTVRENTERPVTVTLGTNLLVG  
SDHRMSEARKVIAGNKKCSIPPLWDGHTSDRIASIL  
B\_ACTIA\_3 LHAVIAGARPNFMKIAPIITRAIDAAISYRLVYTGVDNLSLDAASF----ADLHMKAP--DAYLGV----  
GSGSHAVQTAAMTAFEPVLLNQRPDVAVVYGDINSTVAVALVCAKLGKILHVEAGLRSSMPEEINRLVTDQLADVLFPTSL  
SPEGVHLLSEGARPESVHLAGNVMVDLTLACRERRYGLVTLHRPSNLDGLLTALGEIA--CPLVFPVHPRTASRLAGRL-  
DGVRALGPAGYLDLQMGARLVLTDSGGVQEESTVLGVPCLTLRESTERPITVTEGTRNVVGCSSAIMAGAFEVLDRLP  
PPRCPDLWDGHAGRRISAVL  
B\_ALPHA\_8 PKVLCVVGARPNFMKIAPIITRAIDAAISYRLVYTGVDNLSLDAASF----ADLHMKAP--DAYLGV----  
GSGSHAQQTAEIMRRFEPVLDLAPQALLVGDVNSTIACALVAAKKGVTVVHVEAGLRSSMPEEINRLVTDQISDLLFTTE  
RDALANLITREGIDPARVHVFVGNVMDTLVMNRPRVYALVTLHRPSNLARLLGGLAEIA--  
TPLVFPVHPRTASRLAGRL--  
GTDALLAAWRDVLASGGKTRIEFWDGKASERIASIL  
B\_DELTA\_9 -NVFLVAGARPNFMKIAPIITRAIDAAISYRLVYTGVDNLSLDAASF----ADLHMKAP--DAYLGV----  
GSGSHAQQTAEIMRRFEPVLDLAPQALLVGDVNSTIACALVAAKKGVTVVHVEAGLRSSMPEEINRLVTDQISDLLFTTE  
TSAVRNLFEQGTARVMVTFEELCAKELPDLVIVGDVNSTLACSIVAKKAGIRVAHVEAGLRSSMPEEINRMVTDSDIADLYFVTE  
IPIIFVHPRTASRLAGRL--  
AGTDDRILTRVFDAAEGRGKRKVPVFDGKAAERIVDVI  
B\_BETA\_4 KKVYLIAGARPNFMKIAPIITRAIDAAISYRLVYTGVDNLSLDAASF----ADLHMKAP--DAYLGV----  
GGGSHSQQTAKIMVAFEEYCQTEPPDAVLLVGDVNSTLACSIVAKKAGIRVAHVEAGLRSSMPEEINRLVTDSDIADLYFVTE  
PSGQHQLLQEGKPAISAIHYVGHVMVDNLLYQVEQAYGVVTLHRPSNLERISLTLKQIA--  
LPLVFPVHPRTASRLAGRL--  
TRERILAADDILGGRGKQRRPHLWDGNAARRIVEIL

EU\_Saoeca GNFTIVAGARPNFMKIAPIIHEIQKLVSFRLIHTGQHYDKKMSGDFF----EQLDIPQP--HANLGA-----  
GGGTQAEQTAAMVAFEKELMENRPDLVLVVGDTVSTLSCSIAAKKLQIDVAHVEGGIRSGMPEEINRMVTDSDITDHFHTTS  
EIANQNLRNSGFSEDKIHFVGNMTMIDTLLAQMPKQYFVMTMHRPANLKAMIDAILDGT--  
LPIIFPVHPRTAKNLQAI GIAPNLNMNPLGYLEFNLYLVKNAKGVITDSSGGITEEASVMNVPCITLRDNTERPETIDLGTNELVG  
TNEKLPYLDKIMSGDWKKKGIPLWDGKTAERIVKIL  
B\_DICALES -KVVSIVGARPQFIKLA PFS AELRKNIKEVILHTGQHYDENMSELF--KELEIPEP--DYNLGI-----  
GSGSHGEQTGRMLIGIEEVLVKEKPDVVIVYGDNTSTLAGALASAKIHIPLAHVEAGLR SKMPEEINRIVADHLS DILFCPTE  
TAVENLKREGIE-KGVYLVGDV MFDALMHFSKLYLITVHRAENLKNIFSAISELD--  
KEVIFPIHPRTKNRKLKELGLGRVRIIDPVGYLDMIELEKNALAILTDSGGVQKEAFWLRVPCITLRETEWVETLKYGWNILV  
GSNERILEAIKNIKNG----KEISFENDYASPKMREVL  
A\_EUREOTA -RIASIVGVRPQFVKASVVSREL RKKNEEILHTGQHYDYQMNKLF--EELNIPEP--EYHLDI-----  
GSGSHGYQTGEMLKIEEVLVKEKPDVLVYGDNTSTLAGALAASKLHIKTAHVESGLRSAMPEEINRIVTDHCS DILFCPTE  
NAVENLKNEGIT-KNVYLTGDV MVD SLLYNRKIEYLVAIHRSANLKNIVNAFSELK--  
ETIVFLHPRTDKFLKYG LSSVILIEPLGFFEFIKLMNNAKMILTDSGGVQKEAYVLKVP CITLRETEWVETVND EWNVLV  
GTNEKIVKMVKEFRPFLEK-HRDRFNGNDASKNILLI  
A\_EURTA\_4 -KIVSIVGARPQFIKCAPLSRLIREKHEEILHTGQHYDTGMSDIFF----DELKIPKP--NYNLGV-----  
GNSHGVQTGKMLIEIEKILLRESPDLVYGDNTSTLAGDLAASKLHIKTAHIEAGLRSSMPEEINRVLT DHTSDLLFCPTE  
TAVLNLKKEGIT-TGVYVGDV MLD SLYNIRIEYIVATVHRASNLSSITNAFCHTG--  
VSIVFTVHPRTEKYLKQYGLEKVKVIPPLGYLEMLKLMVHAKKILTDSGGVQKEAYMLGVPCITMRETEWVETIEDGGNV  
LVGTDEKIMDAILNFKGVPV--KGNFFGNGNACAEICKTL  
B\_ACIERIA -KLVTVVGARPQFIKSGPVS LAIEKHIEILVHTGQHYDSEMSQVFF----EEMNL RTP--KYNLEV-----  
GSGNHGEQTAQILARCEKVLMD EKATALMVYGDNTSTLAAALA AVKLHIPVFHVEAGLRSEMPEEVNRVLT DHISDLLFAP  
TDTAVENLKAEGIT-KGVELLGDV MYDAIQHLQTKYALMTMHRASNLGQILSAISEIA--  
IRVVVPHPRARKRME DFGIEGITLISPASYLDMMLVSNASLVLTDSGGGLQKEACWMRVPCVTLRDETEWVETVASGW  
NTLAGADDQILMAARKALTSKPS-ETPGAQHAGASERIAASI  
A\_EURTA\_2 -RPAIFGTRPEIILKSPVIRAFIKNIQPIHTGQHYDYEMSSIFL----EELPEI--DYHLEV-----  
GSGTQAEQTGIAMIKIEKVL MNEVPDVSIVQGDNTNTVLAGALASVKLLIPVAHVEAGLRSTMPEEINRILADHSSEVLFAPTL  
EAKKNLEREGIR-ENVFVGN TIVDAVLQNSKIEYILVTAHRKENLKKLV DILTSLP--  
MQVVYPVHPRAEKRLKEFGLSGVMLL KPLGYLDLFLKLEKNAFIVMTDSGGIQEEAILNVPCLTLRYNTERPETVKAGGNIL  
VGVEDLALRYVKLIEDEAFYAKNPF GDGRSGERIVSIL  
B\_THEOGAE -RVL SLVGAR PQIIEA MLHREFKEKIEILVHSGQHYDYNMSDVFF----EVLEIRQP--HYNLNV-----  
GSGTHGEMTGKIMIEFEKVL LREKPDVLVYGDNTNTLALAGLAAK LIPVAHVEAGLRQDMPEEINRIVTDRVSQILFCPSE  
LAVENLRKEGIT-EGVYFTCDVMYDLFLKMKPL-YIVCTIHRDFNLREILEQLRRLS--  
YEVVFPVHPRTAKRIR EFLNEILVIEPADYLNMMGLIEKSRFVITDSSGGLQKEAYWCGKRAIVMPDTGWRELVEAGWNV  
LSEPD-EITEKSEYIDNHVSL-PENVYGE GNASEKLAEVI  
B\_THEAE\_2 -KVL SLVGAR PQIIEA VLHRRFKEKIEVLVHSGQHYDYNMSDVFF----EILQIRKP--DYNLNV-----  
GSGTHGEMTGKIMIEFEKVL LKEKPDVLVYGDNTNTLALAGLAAK LIPVAHVEAGLRQDMPEEINRIVTDRVSQILFCPSK  
LAVKNLEREGIT-EGVYFVGDVMYDLFLKME DR-FILVTLHRDFNLKILEQLKRIS--  
KKVVFPIHPRTKNRVKEFGLGMVYIDPV DYLNLMLGLVKRCWKVVTDSGG LQKEAYFAGKRAIVMPDTGWRELVEAGW  
NKLASEE-NLFDVTMEEDCSEY--PSGLYGDGNAAGKIVEVI  
A\_EURTA\_6 -KIAIILGTRPEIILKSSIIRELQNFIEYFIIHTNQHYSKNMDEIFF----KELNLPTP--KYNLNV-----  
GSGTHGEQTAKMIDGIEKILISENPDV VIVQGDNTNTVLAGALSASKLHIKVAHVEAGLRSNMPEETNRVLT DHISNYLFAPTE  
IAKHNLKKEGIN-  
KNVFVGN TIVDATIQNIEIEYFLLTLHRAENLTNIVNAIKATYNKIIIFMHPRTEKKLKEYNLSKIEIIEPVGYLEFLLLEKNAK  
LILTDSGGVQEEACILGAPCITLRDNTERPETIYIGSNILVNADNKILDGIGVMANKKIN-GNNPFGDGN SGAIVKIL  
A\_CREEOTA TKVVSIVGARP NFVKLAAVAETFDREFEHTVIHTGQHYDYEMSKVFF----EQLRLRDP--DIHLGV-----  
GSGSQGYQVGEIVKKAEEHLKSINPDVVVYGDNTSTLAGALAAKAGYPVAHVEAGLR SKMQEEINRRVVDHVSALLFA  
PTPSARDNLLKENVP-GKVFLTGDVHV DVLQKWIESQYVMATIHRAENLAEVIKCLKELA--  
TKVVFPIHPRTRSRAEEAGL PNLVATKPLGYVDFLR LVTDSGSKLVVTDSSGGVQREAYLLGKPAIVLDRTEWIELVQAEWVRL  
ADANARLVQEYKLLKPPAPQGLLGDGKAERITKI  
A\_KOREOTA -RLIISVGT RPEIIMAPLYEALS KLI ELLLVHTGQHYDWEMSGIFF----KELGVEEP--DINLNI-----  
GSDDQVSQTSAVMKEIGKIIESYEPDGVIAVGDNTNSVLGTAIAASKMEVPFIHVESGLRSSMPEEINRRISDH LASNFAPTS  
RAFSNLMEEGISPKTTF LSGNTIVDSVIKVL RKS LVT LHRKENLIGVLKALEEL-  
DDITVFWPIHPRTQKALKTFDLKNVRILEPLGYLDLFLGLLISSDLVMTDSGGVQEEAATLKRPCILRENTERPEIIMGFGEI  
AGTNTAISLVRKYLYQANLITPNPFGDGSSSKIIASVI  
B\_BACES\_3 KKIMLVFGTRPEAIKMAPLVKEFKYFQTVCVTGQHRE--MLDQVL----HLFHI-RP--NYDLNIM---  
KQGQDLYDVTARVLIGMRDVLAEVRPDL LLVHGDTTSTATAALSAFYQQIPVGHIEAGLRTPWPEEMNRQVTGRIATYHFS  
PTLLSRQNLLNEG VKGDFIIVTGN TVIDALYVWNKKIVLITGHRRENFIHMCQA IKALSPNVDFVYPMHPNVRKPIHEVFGN  
NLFFIEPLEYLSFVYLM EKSIIVLTDSGGIQEEAPGLGKPVLMVRD TTERPEALEAGTVKLVGTNDKIVNEVSALLDSDSYA  
VNPYGDGKACSKIVNFL  
B\_BACES\_8 KKILLTFGTRPEAIKMAPLVKELQEKFEILVCVTGQHRE--MLDQVL----HIFDI-SP--DYDLNIM---  
RQGQDLYDITSRVLLGMRTILIE TKPDIVLVHGDTTSTATAALSAFYQQIPVGHIEAGLRTPWPEEMNRQITARIATYHFAP TIL  
SKQNLNEG VKEDFIVTGN TVIDALYVWNKKIVLITGHRRENFIHMCHAIKTLAPD VDFIYPMHPNVRKPIINDVFGINIFFIE  
PLEYLSFVYLM DKSFLVLTDSGGIQEEAPGLGKPVLMVRD TTERPEALEAGTVKLVGTDYKIVKEVSKLLESKTYAVNPNYG  
DGCACSRIVTLL  
B\_BACES\_5 KKILLVFGTRPEAIKMAPLVKALQRDFETKVCVTAQHRQ--MLDQVL----EVFDI-IP--DYDLNIM---  
APNQDLYDITTKVLLGLRDV LKDFCPD T VLVHGDTTSTMAASLAIFYRQVAVGHVEAGLRTPWPEEMNRQVTDRICTYF  
APTQKSKQNLLENIDAKKIFVTGN TVIDALLMAVDISYILVTGHRRENFLHICKAIRELAPEMDIVVPVHPNVQKPVYELLSD  
NVYLISPLDYLPFIYAMQHSTLLLTDSGGVQEEAPSLGKPVLMVRD TTERPEAVEAGTVKLVGTDEAIVSNVTELLRNKELY  
THNPYGDGHACERISAL

B\_GAMMA\_4 -KVLTFGTRPEAIKMAPLVKVLATDIESKICVTAQHRE--MLDQVL----ALFEI-VP--DYDLNLM---  
RPGQDLFDVTSVGLLGLRDVLDNDFKPDVLDVHGDATCLGATLAAFYMQIPVGHVEAGLRTPWPEEANRVLVSKLATWHF  
APTQRNKESLVQEGINPERIFVTGNTVIDALQWVVKKQFVLITGHRRENFENICSALKKLAPETHFIYPVHPNVQTPVNRLL  
GNNVHLIKPLGYEAFVYLMQHSYLVLTDSGGIQEEAPSLGKPVLMRDTTERPEAVEAGTVKLVGTSDSIVRELQALLNNE  
SKYAHNPYGDGNACDRVLAVI  
B\_DELTA\_7 LNVMFVFGTRPEAIKMAPLVKELQKQFKTIVCVSAQHRQ--MLDQVL----QLFDI-RP--EYDLDIM---  
KPGQDLFDITSNVLLGLKPVLTKEQPDILLVHGDTTTTMSAALAAYYCRIPVGHVEAGLRTPFPEEMNRRTAGALDHLFAP  
TETARRNLLSEGVADTSIFVTGNTVIDALFVIGENLILVTGHRRENFESICRAIARIAPDVEILYVHPNVREPVRLLGSNV  
HLIEPVDYLPFVYLMQSYLIITDSGGVQEEAPSLGKPVLMRDTTERPEAIGAGTVKLVGTRESIYREARLLDAADAYAL  
NPYGDGKACQRIADIL  
B\_GAMMA\_2 KKVLVFVFGTRPEAIKMAPLVQQLCQDFVAKVCVTGQHRE--MLDQVL----ELFSI-TP--DFDLNIM---  
EPGQTLNGVTSKILLGMQQVLSSEQPDVVLVHGDATTFAASLAAYYQQIPVGHVEAGLRTPWPEEGNRKLTAAALTYHF  
APTDTSRANLLQENYNAENIFVTGNTVIDALLAVREKHLILVTGHRRESFERICQALITTAPECQILYVHPNVREPVNKLLKS  
NIVLIEPQQYLPFVYLMDRAHILTDSDGGIQEEAPSLGKPVLMRETTERPEAVAAGTVKLVGTNQQICDALSLLLTDPQAYA  
HNPYGDGKACQRIADIL  
B\_GAMA\_11 KKVLTVFGTRPEAIKMAPLVNALASDFEAKCCVTAQHRE--MLDQVL----ELFEI-TP--DYDLNLM---  
KAGQTLNEVTAGIQLKLPVLEFKPDVVLVHGDATTFAASLAAYYEQIAGVGHVEAGLRTPWPEEANRRLTGVLTQYHFAP  
TETSKQNLLKENFEPNSIIVTGTNTVIDALLMVKEKDLILVTGHRRESFERICEALATVASDVQILYVHPNVREPVNRLGDNI  
FLIEPQQYLPFIYLMDKAYIILTDSGGIQEEAPSLGKPVLMRDATERPEAVEAGTVKLVGTDKRIVSSLNELLCDLAYAHNP  
YGDGKACHRILKAL  
B\_GAMMA\_5 IKVLSVFGTRPEAIKMAPVIETLKNDFDSRVCVTGQHRQ--MLDQVL----ELFEI-VP--NYDLNIM---  
KPGQDLTDVTTGILQGLRDVFSQFKPDYVLVHGDATTSTTIAAYYHQVKGHVEAGLRTPWPEEGNRKVTGSLANLHF  
APTSTSQNLLAENIPADTIIVTGTNTVIDALFMVRDKNVVLITGHRRESFERICQAVSELVIDVYVHPNVREPVNRLFLS  
PNIIFLIEPQDYLPFVYLMDRSDIILTDSGGIQEEAPSLGKPVLMRDTTERPEAVEAGTVKLVGTDSRIINEVSILLTDKQAYA  
HNPYGDGAASQRILDAI  
B\_GAMMA\_3 NRFLVFGTRPEAIKMAPLVEGLKKNLNFRCVTAQHRE--MLDQVL----ELFNI-IP--DYDLDIM---  
NQTQTLSTVTSILEKIQPVIDYKPNVIFVHGDATTLAASLAAYYQIDIAHIEAGLRTPWPEEGNRKLTAAALAKYHFTPTQ  
ATKENLLRENIDPSKIYITGNTVIDALFLVNKKEVILITGHRRENFENICAAISSLAPDVQFVYVHPNVREPVNRLKNNIHLI  
QPLDYFSFIFLMKNAYLILTDSGGIQEEAPSLGKPVLMRKTTERLEAVQAETVKLVGTTELIIDSVNELLTDIEAYAHNPYGD  
GRAVERILNVF  
B\_GAMMA\_6 NRFLVFGTRPEAIKMAPLVEGLKKNLNFRCVTAQHRE--MLDQVL----ELFDI-IP--DYDLDIM---  
NQTQTLSTVTSILEKIQPVIDYKPNVIFVHGDATTLAASLAAYYQIDIAHIEAGLRTPWPEEGNRKLTAAALAKYHFTPTQ  
ATKENLLKENIDPSKIYITGNTVIDALFLANRKEIVLITGHRRENFENICAAISSLAPDVQFVYVHPNVREPVNRLKNNIHLI  
QPLDYFSFIFLMKNAYLILTDSGGIQEEAPSLGKPVLMRKTTERPEAVQAGTVKLVGTTELIIDSVNELLTDIEAYAHNPYGD  
GRAVERTLNVF  
B\_BETA\_6 KKVLFVFGTRPEAIKMAPLVRMLQTRVDARVCVTAQHRE--MLDQVL----ALFDI-AP--AYDLNVM---  
RQSQTADVTTGILQIGAVFDDFDPDIVLVHGDTTTTLAVSLAAFYRYPVGHVEAGLRSPWPEELNRRVTDVAVSSWHFAP  
TERAQHNLFSEGVQTVGVLVLTGNTVIDALQDVKRMDVVLITGHRRESFAHFCDALRTLAPGVRFVYPLHPNVQGGPAHALL  
DPNVHLIAPQEYLSFVFLMSRAHFIITDSGGIQEEAPSLGKPVLMRDTTERPEAIGAGTVKLVGTDERIVGEASRLDDDD  
AYATNPYGDGHASERIAHAL  
B\_GAMA\_10 MKVLSIFGTRPEAIKMAPLVRALAEIDSRCITGQHQS--MLQQVL----DMFEL-KA--DYSLDVM---  
RPDQTLNSLTAALYAAIDPILDEMCPDKVLVHGDTTSAMVAAMSAFHRRIPVGHVEAGLRTPWPEEMNRRCIDLISDHLFAP  
TAESRRNVLGERLQ-  
GISFVTGNTVIDALHLTAQRDVLVVTGHRRENFLNICKALGELADDIQIVYVHPNVLPVTEHLGPNVHLIKPLDYLSFVRL  
MQRHVILTDSGGVQEEAPSLGKPVLMRDTTERPEAVAAGTVRLVGTEDAIIRGVNALFDDDALWAANPYGDGKASARI  
VDAL  
B\_ALPHA\_6 KKVLCIVGTRPEAIKMAPVILALKQAVVHVLATAQHRE--MLDQVL----NFFGI-VP--DSDLNVM---  
RPNQDLTTLTARLLVGAAGEVLDREPRDVLVQGDTTTTVMAVAIAAFYRRIALGHVEAGLRTPFPEEANRVIAGRLARWHFA  
PTEGAKQNLLREGVSEDRIFVTGNTVIDALLNTAER-  
IVLITAHRRNENIRRICALKELAPDVHLVYVHPNVKVEAETMLAQNVQLCAPLDYAPFVSMRRSHLIISDSGGVQEEAPAL  
GKPVLLRDETERPEAVEAGVVLVGTDDYIVSQVQLLLDDADAYGVSPYGDGMASQRVIEIL  
B\_BETA\_5 -KILIVGTRPEAIKMAPVILALKKEANVRVATAQHRE--MLDQVN----EFFGI-DP--DIDLNIM---  
RPNQALTTTLTARLLPELDDVLQAEKPDVAVLVQGDTTTTVMTVALACFYHHIPVGHVEAGLRTPFPEEANRVITGKFARWHFA  
PTEGSRQNLLKEGVADSKIIVTGTNTVIDALLMSASK-  
LVLVTSHRRENFRNICRALQTLAPDVQFLYVHPNVKDVAAHEFLAHNFTLCEPLDYASFIAMKRAYIILTDSGGIQEEAPAL  
GKPVLLRDETERPEAVEAGVVLVGPNDIVQETQCLLDDEFAYGISPYGDGKAAERIVQVL  
B\_DICES\_2 KKISLVFGTRPEAIKMAPVAKIIESFDLQIILTAQHRE--LLDQVI----EIFGL-KS--DYDLNIM---  
QEKQTLTHITVKVLQGLDIIWQKDPDMVLVHGDTTTTFAASLAAFYKLPVGHVEAGLRTPYPEEMNRLHTGVLADLHFA  
TQRAKDNLINERVPKENIFITGNTVIDALLFVHRNNFILVTAHRRENKKNIVLALDEILEDYVYVFPVHPLVREQVYVSVLKKRAI  
LIPPVDYVTMVYLLDKCYLVLTDSGGVQEEAPSLGKPVLLREVTERPEAVEAGTVKIVGTSESIVREVRRILNKEYAINP  
YGDGKASERIDIL  
B\_THEAE\_3 IRVLSVFGTRPEAIKMAPLVKLEEEVESLVCVTAQHRE--MLDQVL----EVFDI-KP--DFDLNIM---  
KQRQLADITVNALSGLYDLIEELKPDIVLVQGDTTTTFAGALAAFYHRIPVGHVEAGLRTPFPEEINRRLTGVLTSLHFAPTK  
RNRENLLRENVM-  
GKIYVTGNTVIDALRYTVKEHYILLTSHRRENLENICKAVRIVEDVRVIYPVHPVAVREIVFPMLEERVFLIDPVNVIDMHNLM  
ARSYLIMTDSGGIQEEAPALGRPVILRRETERPEAIEAGVAVLGVVEERIFELAKLLLDREEYAVNPFGDGRASERIVKAI  
B\_GAMMA SKVLVFGTRPEAIKMAPLVIEFKNNIEVKCVTQHRQ--MLDQVL----DFFEI-EP--DYDLNIM---  
KQKQSLGSITRDLDEILASFMPAHIFVHGDTTTTFAASLAAFYQNIKVWHIEAGLRTPFPEEGNRKLTSLAFFHAAPT  
QAKDNLLRESVKEKNIIVTGTNTVIDALLIGIKTILVTLHRRENLRICDDIKQLADDIEIVFPVHPRIREVVNEKLSVNIKLV  
LAYPGFIWLMNNAHFILSDSGGVQEEAPSLQKPVLVARDTTERPEVIENGAAMLVDPRNNIYSSCKKLLSDERLYAGNPF  
DYGKASKILDYF



B\_CYAIA\_2 PRVTIVLGTREPEAIKLAPVIEFQACLETRVVLGTQHRE--MVTQVM----DLFSL-KA--DQDLNLM---  
APRQTLTHVTCALQGLRDDFQAYPPSLVLVQGDTTTTAFAAALAAFYEQIPVGHVEAGLRTPPFPEEANRRLISQVAQLHFA  
PTQQSESNLLASSVV-  
GKVMVTGNTVIDALLRMAERPVLATVHRRENLSIAEGMLQVLPDTALLPLHPTVREPLQALLGPRVVLTEPLDYDRLVA  
AMKGCTLLTDSGGLQEEAPALGKPVVLRRTTERPEAVEAGTARLVGTDGTIAEEAHRLLSDPQAYAVNPFQDGGQASARI  
LEAA  
EU\_Paella PLVSIVLGTREPEAIKLAPVIMSFQKCLRTRTILTQGHRE--MVNQVM----KLFQL-SF--DKDLALM---  
EPNQTLTHLTATILEGLRKEFLVHRPSLVLVQGDTTTTALASAMAAFYEQIPVGHIEAGLRTPPFPEEGNRCLISQITKLFHFSPTI  
QSAANLQASGVI-  
GEIHITGNTVIDALLSMSQKSVILATVHRRENNGIAYGFFKLLSDVALLPLHPAVRKPLNDILKPRAFLTEPLAYDQLVAAM  
RSCSLVLTDSGGIQQEEAATFGKPVILRRTTERSEAVEGGTARLIGTDTDILNEASLLLKDDSAFYNNPFQDGGKASDRILTAA  
B\_CYAIA\_3 IRVAVVLGTREPEAIKLAPVIQQLQSFETHVILTQGHRE--MVKQVM----QLFDL-DA--DYNLEIM---  
QRSQTLTDTWRSQGLEGLFQQLRPDIIVQGDTTTTAFAAALAAFYQKIPVGHVEAGLRTPYPEEANRRLISQLTQFHFAPT  
TQAVDNLNRNSGVL-  
GEVHHTGNTVIDALLSVVKCPILATVHRRENLTQIAESFLKILPDTALLPLHPTVREPLQKILGPRIFLTEPLDYAELVAIDR  
CYFVLTDSGGLQEEAPSLGKPVVLRKTTTERPEAITAGTAKLVGTEAEIVEAATELLNNINTYAINPFQDGGHAAEYIVQII  
B\_CYAIA\_5 KRISVIIGTRPEAIKFGPLILAFKLTIDLRIISTGQHYE--LVDQVN----ELFKI-VP--NKNLKIM---  
VPGQSLTKITNEVLIGLKEDFNEYPPDLVLVQGDTTSAFSAALAAFYEKIPIGHIEAGLRTPYPEEANRRIISQIASIHFAPTKIA  
FENLKKESVL-  
GEVYLTGNTVDSLLFISEKQIILATVHRRENKQIAKGLKILLDYILILPMHKSRLREPLEEILGERAILTESLSYNSLVGTLKH  
TKLLLTDSGGLQEEAPTFGVPVVLVLRDSTERPEAIKAGTAKIVGSNNKIFKEANNLLTNQKEYAINPFQDGGKASERIVKYC  
B\_DELA\_10 -RILIVFGTRPEAVKLAPLIHDLRQRADVEVCLTQGHRE--MVTQVV----SFFGV-DV--DHDLEIM---  
RPNQTLSDVAARTLTGVDRILESRRPDWVIVQGDSTCLATALAAFHRRKVRVAHVEAGLRSPFPEEMNRVLTTPIASLHLA  
PTSRAKANLRAERPEDRIRVVGNTGIDALLAVQTRLVLTGHRRESFEELCEAIRDVADDVAVVYVHPNVREPFRILS  
SNVHLVEPVEYPALVWLAQRSRFLTDSGGIQQEEASALGKPVLMRDVTERQESVEAGVSRVLTSEVIREACNSLLRDEA  
TYRVDLYGDGKASARIGDAL  
B\_ACTERIA LRVGIVYGTREPEAIKLAPLVLALDADFEPVIITGQHRD--MLDEIN----ELFGL-RP--RHNLDIM---  
RPGQRLSAMASRIVGELGDPLLDLVDVAVVQGDSTAFAAAYAAACERIPVAHLEAGLRTPPFPEEINRRLITQLADLHFAP  
TADAAGNLLAEGVRSDDVYVTGNTVIDAMHLVLDRGTVLLTMHRRESMGRVAAVAELCPTLRFVIPLHPEVRRVFRSHLS  
SQVLLCEPLRYSEFIRLMHRAVLVLTDSGGVQEEAPTGLKPVVLRDRTERPEGIAAGCARLVGTDALIVKEVGRLLDDPEA  
YGIFCYGEGDAAARCLEAL  
B\_ACTIA\_2 LRVGIVYGTREPEAIKLAPLVLALDADFEPVIITGQHRD--MLDEIN----ELFGL-RP--RHNLDIM---  
RPGQRLSAMASRIVGELGDPLLDLVDVAVVQGDSTAFAAAYAAACERIPVAHLEAGLRTPPFPEEINRRLITQLADLHFAP  
TADAAGNLLAEGVRSDDVYVTGNTVIDAMHLVLDRGTVLLTMHRRESMGRVAAVAELCPTLRFVIPLHPEVRRVFRSHLS  
TQVLLCEPLRYSEFIRLMHRAVLVLTDSGGVQEEAPTGLKPVVLRDRTERPEGIARAAP---  
GWWPTRHSSSKRSADCSTTPGVRASSATAASAGCLPPT  
B\_ACTIA\_6 RTVLLVYGTREPEAIKMAPVVHELGRTLRPPVAVTGQHRD--MLDQVN----DLFGI-VP--DYDLGIL---  
RDRQSLAGVTRRSGLLESVMAEVRPDVVVVQGDTTAFTGALAAFYQGLPVVHMEAGLRTPPFPEEINRRLITQLADLHL  
APTSPARANLLAEGIRPESVLTGNTVIDALLHVTAAPVLLVTAHRRESLARVGAALARLAPPELLIVPVHPVRETVPVVE  
PNILVADPVDYAAFAHLMKAATVLTDSGGIQQEEAPSLGKPVVLRDRNTERPEGVQAGTACLVGTENRIVAADVRLDDPVA  
YAINPYGDGQAARRTVAAI  
EU\_Cow\_2 TRVLSIFGTREPEVIKFPVLKEMDRRLSITCVTGQHRQ--MIDPLL----SLFDI-AT--DIDLNLM---  
TQGQTLNLSARLFTALAPVFEAVRPHLVLVQGDTTTTAMIAAMCAFYRVPVGHIEAGLRTPPFPEEINRRLISVVGNLHFAP  
NYAAEALRAERIDMQTVFVTGNPVIDAILIREKPHILLTAHRRENIAAICRAVKRIIKDVHIWYVHPAVCVPRQELGERV  
HLLDPLEYDVFVHFLDRMYMVMTDSGGIQQEEVTALAKPTIVLRETTTERPEGVDAAGVTKLVGIHDTIVKEANVLLTDEQTFKC  
FPFGDGTAAKQIVDIM  
EU\_Cow\_3 TRVLSIFGTREPEVIKFPVLKEMDKRILSITCVTGQHRQ--MIDPLL----SLFDI-AT--DIDLNLM---  
TQGQTLNLSARLFLALAPVFEAVRPHLVLVQGDTTTTAMIAAMCAFYRVPVGHIEAGLRTPPFPEEINRRLISVVGNLHFA  
PSSYAADALRAERIDMNTVFTGNPVIDAIMLIREKPHILLTAHRRENIAAICRAVKRIIKDVHIWYVHPAVCVPRQELGER  
VHLLDPLEYDVFVHFLDRMYMVMTDSGGIQQEEVTALAKPTIVLRETTTERPEGVDAAGVTKLVGIHDTIVKEATLLTDDQTFK  
CFPFGDGTAAQIVDIL  
B\_ALPHA\_5 RHVMVIVGTREPEAVKMAPVIKALYARFRCTVVSTQGHRE--MLRQTL----TSFGL-SV--DVDLIDIM---  
QPDQTLASLTGAAIGACEKIFQAARPDVVLVQGDTTTTVLSASLAHYAQIPVGHVEAGLRTPPFPEEMNRKLVTSLATLHFAP  
TERSARQLRKEGVPPSKVFTVGTNTVVDALAEELRGRTFVLVLTCHRRESLNVIVEAIAMLAPDRTPFFVHPNVRALVMPRLN  
ENVVLADPVPYADILFCLSSAELVLTDSGGLQEEAPSGFVPIVLRRTTERPEGVVAGFSRVLPIEENIVSLASSWLRSHRK-  
RPNPYGDGNAARIVDIL  
B\_ACTIA\_4 TEVHLVAGTRPEAIKLAPLVPALRAQMTPVVFVASGQHPT--MVHQAL----DAFGL-EP--DVTLSID---  
RSGSQAEALMAALTMKLEKHWQRTPAVVVQGDTTTTVLAAMVAFWAKLPIAHLEAGLRSPFPEEGNRKLVGQISRLHL  
APTARARANLREGTPAADIVVTGNTVIDAVLGAARGLVLTVAHRRESLDRVLNAVALLSDVEVLPAPPAVAEQVRAVLG  
PRVLVTEPLAYPVVVGALAASTLVLSDSGGIQQEEAPSGFVPIVLRREVTERMEAVDAGCAILVGTDDAVLGNACRLDDPDE  
RKGPNPFQDGRAAERSAAA  
EU\_Oscusi IKIAIVFGTRPEAVKMAPVIQAVARSLSAILISTGQHKQ--MLEQVL----RQFSL-QDKIQHELALM---  
KPNQQLAELTSSAVRAVDGVLRRSKPDVAVLVQGDTTTTAFITSLAAFYKIPVGHIEAGLRTPPFPEEINRQCISVMATYHFAPT  
EHAAKNLYDEGRR-TNVFTTGNTVTE-----PLLLLTAHRRENILNIFTSIEKLLPDVVVIYPIHP-  
MSDHAPPTTTRRLIVPPLDHADLLFMMKESFFVMTDSGGIQQEEAVTLGKPVVLRDRTTERPEGVLAGAAKLVGHGESIYT  
EAASLLKDPDSYSKTYGDGNAAGNIVAKE  
EU\_Ossi\_2 IKIAIVFGTRPEAVKMAPVIQAVARSLSAILISTGQHKQ--MLEQVL----RQFSL-QDKIQHELALM---  
KPNQQLAELTSSAVRAVDGVLRRSKPDVAVLVQGDTTTTAFITSLAAFYKIPVGHIEAGLRTPPFPEEINRQCISVMATYHFAPT  
EHAAKNLYDEGRR-TNVFTTGNTVVDALYAILKTPLLLLTAHRRENILNIFTSIEKLLPDVVVIYPIHP-  
MSDHAPPTTTRRLIVPPLDHADLLFMMKESFFVMTDSGGIQQEEAVTLGKPVVLRDRTTERPEGVLAGAAKLVGHGESIYT  
EAASLLKDPDSYSKTYGDGNAAGNIVRIL



B\_DELTA\_2 LRLGVDLGGTKIEIIALDDGGNELEATVIGIGTPGAVSRATGLLRN-SNSCLNGKPIARDLGRPVRIANDANCFALSEYRDGAARVVFAGVGTGTGAGIVVGGVELEGVNAIAGEWGHNPLPRCYCGRYGCIEFLSGPGMSCEHTLLRYEDRMARSLAHVINILDPDVIIVLGGGMRRLYRNVPRLWGAYVFSRVDTRLVPPRFGDSSGVRGAAWLWG-----

B\_ALPHA\_2 IRFGVDFGGTKIEVAALNAAGDFVFKPNLGLGIPGSISPRTGLIRN-ANSYLNRPFGENLARPVRIANDANCLALSEAADGAGAVVFAAIVGTGCGGGVVVDGKIINGHNGIGGEWGHAPLPDCWCGRKGCLETWIAGPAFKASAAALDRYVDRLARSLAVVCDLIDPDIIVLGGGM DALYERLPAAIAPHVFSDFIFETPVRKAVHGDSSGVRGAVWLWPPEV---

B\_GAMA\_20 MRMGVDLGGTKIELVALSDEGNELVTTVGVGIPGVVSPYSGLVKN-ANSWINGHPLDLDLQREVRVANDANCFVAVSESDGAAAVFGVIIGTGCAGVAINGKVHGGNGIGGEWGHNPLTRCF CGNPDCIETFISGTGFIAVAADFDRYMDRLARSLAHVINMLDPDAIVLGGGMAAIYPRLPALLAHYVVGRECHTPVVQNLGYC SSGVRGAAWLWEK----

B\_GAMMA -YYGLDIGGTKIELAVFNEKLEKLVPTVGLGVPGFVNQQTGLAEI-ANIVADNKPILCDLGREVRAENDANCFALSEAWDTENQTVLGLILGTGFGGGFVNGKVHSGQVGMAGELGHLQLYQCG CGNKACLDNYLSGRGFSVDFVNLVVELAAISIGNIITAFDPHMIVLGGGLDYLEALPKALPPHLMRKAKVPPIKKAKHGD SSGVRGAAALFLTK----

B\_GAMA\_10 -YYGFDVGGTKIEFGAFNAQLERVVATVGLGIPGMEDADNGCVLT-VNVAAGKPLRADLGRAVKVENDANCFALSEAWDDELKSVMGLILGTGFGGGLVYEGKVFSGRNHVAGEIGHMRLGCG CGNKGCMNDNYLSGRGFKAVEHVERFMELLAICFANIFTANDPHVVVVGGLDLIYEEMPKRVPKHLLSVAKCPKIVKAKHG DSSGVRGA AFLNIK----

B\_GAMMA\_7 -YYGFDIGGTKIALGVFDSTRRLQVPTVIGIGIPGMPETEDGTLYA-ANVAASGKPLRADLDRDVRDNDANCFALSEAWDDEFTLMGLILGTGFGGGLVNGKIPITGQSYITGEFGHMRLRRCG CGQMGCINYL SGRGFQAH AHVERYLDLLAVCLGNLITVDPDLLVIGGLTAITQLAERLPRHLLPVARAPRIERARHGDA GGMRGAAFLHLTD----

EU\_Oryza -YYGFDIGGTKIALGVFDKDLRLQVPTVIGIGIPGMPETDDGTLYA-ANVAASGKALRADLERDVRDNDANCFALSEAWDDEFRLVMGLILGTGFGGGVINGKIPITGRSYITGEFGHIRLTRCGCG QHGCINYL SGRGFQAREHVERYLDLLAGRLSRFRAMDKPRVVVLTGGIDGLWEHRVEDVATPEGFARDPDLVQAQLQ QPEIAPNPAHLALAKLEEA

B\_ALPHA\_7 -LIAFDIGGSRIRAARVVFAPDHLELPMVAISIAGVIDPASGR LTS-ANLAVNGRRLAGDLGRPWWIGNDADCFVLTEARRGVARNVFGIILGSGVGGGLVDGALVAGAGGITGEWGHGPVLRCCGCGTGLD TVGGARGIAAAETVSVWLELVSGPLAVLVNVGSSVVPVGGGLRDLVAALDRAVRQRLLRPTTEPVL RPA-IHPEPGLVGAALAGLETFG--

B A l p h a a AALAILDGGTELRAALVDRDGKILVPTVGVGAPGLDPLAGIAGPPTL GWQDVPLADILGLPVRENDANAAALGEWRFG AGHSLVFVTSTGIGGGVADGRILHGRRGLAAEIGHMTIERCFCGAVGC FEAIASGTALLALALLEEEARWLGVGFTNLL HLYSPDLVVGGGIDLMHPVIEATIRQRAMRAYRDVPVQAQLGRHAGLVGAASLVLFDDGSL

B A L P A 1 4 VALAFDLGGTELRAALVDEEENLLVPTIGIAGPGLDPEAGVVI AAPT LGWNEVPLADILQLPVRENDANAAAVGEWRYG AGRSIVFVTSTGIGGGVIADSRILHGRRGLAAEIGHMTIERCFCGAVGC FEAVASGTALLALELLNAEARWL GIGFTNLLHL YSPDLVMGGGIDLLHDTIMATICDRAMPAYRDVPVIAAQLGRHAGLIGAASLILGSEAQA

B A l p h a 2 VALAFDLGGTELRAALVDEEENLLVPTIGIAGPGLDPEAGVVI AAPT LGWNEVPLADILQLPVRENDANAAAVGEWRYG AGRSIVFVTSTGIGGGVIADSRILHGRRGLAAEIGHMTIERCFCGAVGC FEAVASGTALLALELLNAEARWL GIGFTNLLHL YSPDLVMGGGIDLLHDTIMATICDRAMPAYRDVPVIAAQLGRHAGLIGAASLILGSEAQA

B A l p h a 3 VAIGIDLGGTQVRAALVDEEGRILEPTVGV SAPGLD TVAGVASNIPTLGFVDFPLKAELPFVVDLENDAAI AAGWQFGA GKNLVYVTVSTGIGGGVSDGRVVRGRKGMAAHVGHMSVELCPCGNRGC FEAYGSGTAF LANQLVDEEAEILGRGFTSL IHIFSPDIIVMGGGLDRLQPGIQAYITQWAMPFRDVKVLAALDQNSGLVGAALAFLTGKVP

B C h l d i a e CVIGIDLGGTKIGIVLNVSGTLIKTIGIVAGQIDEETGVVRFAPNLGWHQVTLRKNLEIPVKVNDVRAITWGEWLYGAG KDLICLFVGTGIGSGIVCQGMKQKGDNNTFGEVGHMTIPRCTCGNNGCFEAFAGGWGILALLILEKVQKAL IAGCINLVNAF NPAACLILGGGVPEILSFIDKGIRETALKTADKLQIKTALLGKNVGIIGSGAVILDVLKNN

B D E L T A 4 YAVGVDLGGTKIAVALVDDRGEVLYLTIGIVAGQIARDDGMVRFAPNLGWRNIPLGEQLRLRVVVNDVRAAAAGEWAFG AGKDLICMFVGTGIGGGIVAQGRMLHGCGNSAGEIGHVVVPLCHCGRRGCMEALAGGWAILARQLIDRAAEALSVGAVSL VNAFNPCRLLILGGGVPELIERVREGIRHHALVTAESVTVVPASLGDDAGVIGAAVLAMQSPA--

B D E L T A 9 PTLGIDLGGTFARA AVVDEVGKLI VALCGVAAAGQIHKDSGVL SVAPNLGWRNVPLGALLGQPVRVNDLAAA AWGELHA GAGRDMLVVFGSGVGS AIIAGGRLVDGGGGVAGELGHIKVRRCGCGELGCLEAYAGGHNLAAGEVYARAAQFLALAVA NQVTMLNPARLVLGGGVPLRRRVEEGVRAWSSTTSEGLLIADAELGDDSGLIGAALLVK-----

B C y a e r i a KILALDFGGTKLAAATLISGQKWRQLIGISFGPVDAKTGIVR LSHVGVENVPLREILNVPVRVDNDANVAALGEYKFG AGQSLLYITVSTGVGGGWILNNRLWQGTQGMAGEIGHTVVP LCLCGKRGCVERLASGPYILCQNAIKLAGWAIGVGIGNA ANLINPQRFILGGGVDFLWHQVRQISRQTALPE-VDFEIVSAQLGDEAPLWGAVALAETGLEN-

B F i r c u t e FCIGLDVGHNRKLVVMNLAGEIKIPTLGIGMPGLLDPDTGMVNFSPDFGWEHVDLLGRFGFPVLIENANRVMALGERWF GAGRDFLCVNLGHGIGSALVFDGEIYHGNSGSSGEIGHITLPLCECGNHGCLEALASGRAIEAEDILDNAIEYIGIAIAGVVN LFDPELIIFEGGLSYLLPRLKETIRRHQMH LARNVQLLKGNLGEDITAVGAATLLQLDLLNH

B C H L R O B I WAIGIDLGGTAVKAAIVSRKKGILVPTIGFGAPGAVDIEAGT LSYPPNLGWTTFPLRSELSVPVVIENDANAAAYGEAVYGAG RDFLMVTLGTGVGGGIVLNRKLYRGPNGTAG EIGFMIVPAVHAGIHGTIEGMIGKERILSLAVWNHV GAILGTGFACVTSML DIRKFVIGGGITLIFEPAYRQLLRSTLPSMDGLELVP AELGNSAGIYGAAALCFS-----



P a r a c t u s 1  
SALAVDMGGTQLRVALIAADGEIKRPTVGISTGGRVNSKEGLVMHTKAIGWDEIDLRTPIHLPVWVDNDGNCAALGERKFG  
HGRDFITATGTGIGGGIVLDKRLIHGTNFCAELGHIKVPACQCGSHGCVEAYSSGMALKAKKILDTGAQALGTAITSLLHV  
LNPKLVLICGVLNVYLEPVREAVKAHSLPSASEVEIVSSQLVE-PALLGAASLVLEYATR  
S t r o n t u s 1  
SALAVDMGGTQLRVALIAADGEIKRPTVGISTGGRVNSKEGLVMHTKAIGWDEIDLRTPIHLPVWVDNDGNCAALGERKFG  
HGRDFITATGTGIGGGIVLDKRLIHGTNFCAELGHIKVPACQCGSHGCVEAYSSGMALKAKKILDTGAQALGTAITSLLHV  
LNPKLVLICGVLNVYLEPVREAVKTHSLPSASEVEIVSSQLVE-PALLGAASLVLEYATR  
Patirne\_3 -----  
LIHGTDFCAELGHTKVPCCQCGGTGCVEAYSSGLALKAQDIMDRGAKAVASVVNLLHILNPSRVVLCGLVPAYIETVRNI  
VKKEALPSAAHAEI-----  
XENOTELLA -----  
KAEAVLDRGAKALSAAITLLHTVNP SLIIITGVLPVYIDKVQDTIKKAALPAAQQVDIKVSKLKE-PALLGAASIALDFMTRR  
S y m s a t i o n  
LALAVDLGGSFIRVALVDDRGNIETEMVGVSTGGRVNSSETGEILFTKVLGWGGVALKTRLGLPCYVENDGNCAALAEVHF  
GSHKDMVVLHFGTGIGGGIQQDGLLNGSSYSAGEFGHIVVPCDCMCGNSGCVEAYAGGWALYAVQHINRAVRASALLTI  
YSSYNPPVAILAGPLPVYFDG VKNKLEERSAILGRNFTLLQSDMTE-MSLKGAATLVLNPSRA  
B G A M A 6  
QYIGIDVGGT<sup>-</sup>HVKYGVINS<sup>-</sup>DGEELFDTIGV<sup>-</sup>SFPGHINPHNGHAAKAGALY<sup>-</sup>LDDVNL<sup>-</sup>MELFDLPLV<sup>-</sup>VENDAN<sup>-</sup>CAALGEMWR  
G A G Q N L V C I T I G T G I G G G I I V G R E L Y R G A H F H A G E F G V M P V - - - -  
GNNGSMHKIASTSGHLHREAVNDWARYLSRGVYSVISMFDPGVMLIGGGIEKLYPLLRHLETFEMWEALQVPIQPCQLG  
NQAGRLGAVWLAQQKLARS  
B\_Baces\_6 M K L S I D L G G T N I R I A Q V E -  
KGNCLVPCI<sup>-</sup>GIGVPSIVDPEK<sup>-</sup>GIVYNVANISWKEIHLKEILKVAVAINNDSNCF<sup>-</sup>TGLES<sup>-</sup>LYGEGK<sup>-</sup>NMVG<sup>-</sup>VTIGT<sup>-</sup>GIGAG<sup>-</sup>VVIGR  
R L Y G G Q Y M G A G E I G S F P Y - - - - -  
FEHYCSSFLFAALEIWKEFG<sup>-</sup>GRHLGNLIKAILFAYAPQAI<sup>-</sup>VLGGGIPFFKNAMEQ<sup>-</sup>TMQSF<sup>-</sup>PKIIDNV<sup>-</sup>SVVAS-  
HQKDSLLGAAALLE-----  
B\_GAMA\_19 S V L C L D L G G T K L M L A Q V E -  
GKTL<sup>-</sup>LYPVI<sup>-</sup>SIGIPGMVDMQSG<sup>-</sup>TLEVLNIALTATQ<sup>-</sup>LAQQLEMDV<sup>-</sup>VVNNANL<sup>-</sup>FALGEAVLN<sup>-</sup>RNQDMLG<sup>-</sup>ITLGTG<sup>-</sup>VGAGVIF  
N G Q L Y S G K H C A A G E I G S L S Y - - - - -  
RDGII<sup>-</sup>EHYCSGQYFQALQAF<sup>-</sup>AHFG<sup>-</sup>EHLAHMIAQTLL<sup>-</sup>VYDPKDI<sup>-</sup>LGGSPFFIEAL<sup>-</sup>NQKLQSL<sup>-</sup>VYGPQAD<sup>-</sup>LTI<sup>-</sup>SASQH<sup>-</sup>HN-  
AALIGAAQWFLQKQDSV  
B F I R C 1 7  
QYL<sup>-</sup>AIDVGGT<sup>-</sup>TKYGLV<sup>-</sup>SATGALSQ<sup>-</sup>PTIGLALPG<sup>-</sup>VIDSQGLVKASAT<sup>-</sup>LFLEGLV<sup>-</sup>LTQ<sup>-</sup>LTVP<sup>-</sup>ILINDGNAA<sup>-</sup>ALAEHWRGNL  
ANSAMV<sup>-</sup>VLGTG<sup>-</sup>VGASLFLNG<sup>-</sup>QLYHGSH<sup>-</sup>HVAGEPSFM<sup>-</sup>VTPI<sup>-</sup>MQREQTAAGL<sup>-</sup>SAVINAMEAA<sup>-</sup>VILRTF<sup>-</sup>TRGVAAMI<sup>-</sup>YNMQTV  
LDLEK<sup>-</sup>VIIGGIP<sup>-</sup>RVKEIRDD<sup>-</sup>IEAYQQ---R<sup>-</sup>LPVVEPAKYRNAANL<sup>-</sup>IGAVAPLV<sup>-</sup>VRG---  
B\_Bacetes Y F I G V D I K K F A I N I G L I N F K G D M V I P Y I C I N I S G R V N P E S G Y S F S - - -  
MNFSEL<sup>-</sup>PLAEVLG<sup>-</sup>YSVCID<sup>-</sup>NDTRAMTYGEY<sup>-</sup>MQGC<sup>-</sup>VKNII<sup>-</sup>FVNVSWGLG<sup>-</sup>IIIDGK<sup>-</sup>VYTGKSG<sup>-</sup>FSGE<sup>-</sup>FGHIN<sup>-</sup>VILCH<sup>-</sup>CGKKG  
CLETEASGSALLCIEIVE<sup>-</sup>EIGQKL<sup>-</sup>GKQIAG<sup>-</sup>LINL<sup>-</sup>FNPEL<sup>-</sup>VIIGG<sup>-</sup>TLDYITQ<sup>-</sup>PIKTAV<sup>-</sup>RKYS<sup>-</sup>LNLVK<sup>-</sup>DSVI<sup>-</sup>ITSKL<sup>-</sup>KDKAG<sup>-</sup>IVGAC<sup>-</sup>ML  
ARSRMFES  
B G A M A 1 4  
HYLSIRIS<sup>-</sup>RGEIFLAL<sup>-</sup>RDLSS<sup>-</sup>KLVLPLIAIT<sup>-</sup>LPGIID<sup>-</sup>TENG<sup>-</sup>VVHRMP<sup>-</sup>YYDV<sup>-</sup>KEMPLGDAL<sup>-</sup>GV<sup>-</sup>PYIQH<sup>-</sup>DISAWT<sup>-</sup>MAEAL<sup>-</sup>FGAS<sup>-</sup>R  
DVIQ<sup>-</sup>VVIDHNVGAG<sup>-</sup>VITD<sup>-</sup>GHLLHAG<sup>-</sup>SSSLVEI<sup>-</sup>GH<sup>-</sup>TQVKRCY<sup>-</sup>CGNHG<sup>-</sup>CLETIAS<sup>-</sup>VDSVLAK<sup>-</sup>DIISG<sup>-</sup>VGTH<sup>-</sup>VGRILAIM<sup>-</sup>VNLF<sup>-</sup>NP  
QKILIG<sup>-</sup>SPLDILFPAI<sup>-</sup>ADSI<sup>-</sup>RQALPAY<sup>-</sup>RNTV<sup>-</sup>VESTQ<sup>-</sup>FTNQGT<sup>-</sup>MAGAAL<sup>-</sup>VKDAM<sup>-</sup>YNGS  
B G A M A 9  
HSIAVRIG<sup>-</sup>RDY<sup>-</sup>QLSLY<sup>-</sup>DLGGNS<sup>-</sup>LHEFIG<sup>-</sup>VALP<sup>-</sup>GLVNP<sup>-</sup>PETGV<sup>-</sup>VEYMP<sup>-</sup>NVAINEL<sup>-</sup>PLGAT<sup>-</sup>IHVECF<sup>-</sup>VGND<sup>-</sup>VRGIAL<sup>-</sup>AEHY<sup>-</sup>FGAS  
QDSIL<sup>-</sup>VSVHRGT<sup>-</sup>GAGI<sup>-</sup>VNGQ<sup>-</sup>VFLG<sup>-</sup>YNRN<sup>-</sup>VGEI<sup>-</sup>GHIE<sup>-</sup>QCQCG<sup>-</sup>NFG<sup>-</sup>CLET<sup>-</sup>VATNPAILAK<sup>-</sup>QALV<sup>-</sup>RVGN<sup>-</sup>QLGKAI<sup>-</sup>AITV<sup>-</sup>NL<sup>-</sup>FN  
PQKIV<sup>-</sup>IAGQIE<sup>-</sup>IFPAI<sup>-</sup>QRNV<sup>-</sup>ENQSL<sup>-</sup>KTFQ<sup>-</sup>HLPV<sup>-</sup>SSQV<sup>-</sup>YK-QPT<sup>-</sup>MGAFAMIK<sup>-</sup>RAML<sup>-</sup>NG  
B T e n u e s  
KILGID<sup>-</sup>LGGS<sup>-</sup>AKVGVISQ<sup>-</sup>NGDLEIT<sup>-</sup>NVGIT<sup>-</sup>APGF<sup>-</sup>VDHNGK<sup>-</sup>IVMAP<sup>-</sup>NIGW<sup>-</sup>FN<sup>-</sup>YDLKTEAK<sup>-</sup>PKV<sup>-</sup>YVIND<sup>-</sup>VNAAAL<sup>-</sup>GEYR<sup>-</sup>KGS  
GLSGL<sup>-</sup>FYWLGT<sup>-</sup>GIGGAI<sup>-</sup>CDG<sup>-</sup>KLISG<sup>-</sup>SHGFAGE<sup>-</sup>FGHGG<sup>-</sup>SLKCN<sup>-</sup>CGLN<sup>-</sup>NCIEK<sup>-</sup>VCSATT<sup>-</sup>IELK<sup>-</sup>NSLLE<sup>-</sup>VYDEL<sup>-</sup>FNHMS<sup>-</sup>LLIHA  
LDPE<sup>-</sup>VVIGGG<sup>-</sup>NNLLE<sup>-</sup>LFLQ<sup>-</sup>LG<sup>-</sup>VKNK<sup>-</sup>LTD<sup>-</sup>SYDIV<sup>-</sup>DFKLALL<sup>-</sup>KNDAG<sup>-</sup>MIGAA<sup>-</sup>FYALE<sup>-</sup>QSL<sup>-</sup>KT  
B A c i a 4  
VVLTAD<sup>-</sup>LHPR<sup>-</sup>KAAIA<sup>-</sup>VIDL<sup>-</sup>NGRV<sup>-</sup>LLSLV<sup>-</sup>GVSLP<sup>-</sup>GRVDS<sup>-</sup>QTQRLIF<sup>-</sup>APNL<sup>-</sup>HWPDF<sup>-</sup>DLRQAL<sup>-</sup>RMPVEMEN<sup>-</sup>AA<sup>-</sup>NA<sup>-</sup>CLTSEL<sup>-</sup>WFG  
RMQNA<sup>-</sup>VLITV<sup>-</sup>SEGIG<sup>-</sup>GILANG<sup>-</sup>QLVTG<sup>-</sup>QNGMAGE<sup>-</sup>FGHIS<sup>-</sup>LPRCG<sup>-</sup>CGQRGC<sup>-</sup>WET<sup>-</sup>FASCKAA<sup>-</sup>HAVGAL<sup>-</sup>TEQAR<sup>-</sup>QIGR<sup>-</sup>GLRL  
VIAS<sup>-</sup>LSP<sup>-</sup>ELVLIAGE<sup>-</sup>VNLVAPAL<sup>-</sup>RKEMEA<sup>-</sup>QWLGG-TMP<sup>-</sup>RIEPT-FSDAAR<sup>-</sup>LRGAA<sup>-</sup>AMLLQ<sup>-</sup>RRASA  
B A L P H A 3  
LAIG<sup>-</sup>FKLMV<sup>-</sup>GS<sup>-</sup>VECV<sup>-</sup>VDL<sup>-</sup>ATSPL<sup>-</sup>LLTIG<sup>-</sup>ISMPG<sup>-</sup>VIDND<sup>-</sup>QATC<sup>-</sup>VRSH<sup>-</sup>RFN<sup>-</sup>WNNV<sup>-</sup>PLASIL<sup>-</sup>KVPV<sup>-</sup>WLED<sup>-</sup>DTN<sup>-</sup>AYIA<sup>-</sup>QQ<sup>-</sup>LV<sup>-</sup>FGV  
GRNMA<sup>-</sup>VLAIG<sup>-</sup>VGISCAL<sup>-</sup>IEG<sup>-</sup>KLYR<sup>-</sup>GANGA<sup>-</sup>AGK<sup>-</sup>FGHTL<sup>-</sup>HRLCE<sup>-</sup>CGK<sup>-</sup>RGCLMAY<sup>-</sup>HSQ<sup>-</sup>TSM<sup>-</sup>AVGD<sup>-</sup>ILREAG<sup>-</sup>IGIG<sup>-</sup>KALAN<sup>-</sup>LVN  
VTDPE<sup>-</sup>VIVV<sup>-</sup>GGEA<sup>-</sup>EAF<sup>-</sup>FEPL<sup>-</sup>RSTL<sup>-</sup>AAHTF---RAS<sup>-</sup>P<sup>-</sup>LLPD<sup>-</sup>WEDNS<sup>-</sup>WARGAA<sup>-</sup>ALV<sup>-</sup>TQ<sup>-</sup>KFFDF  
B A L P A 1 5  
YAVGI<sup>-</sup>HIT<sup>-</sup>PLGI<sup>-</sup>NAALIN<sup>-</sup>SGD<sup>-</sup>VIREAV<sup>-</sup>GLAL<sup>-</sup>PGPF<sup>-</sup>GVES<sup>-</sup>MSFV<sup>-</sup>GP<sup>-</sup>TTMG<sup>-</sup>QDVAL<sup>-</sup>RERL<sup>-</sup>GL<sup>-</sup>PAFF<sup>-</sup>ETDMA<sup>-</sup>AAA<sup>-</sup>AMGER<sup>-</sup>LYG  
LGA<sup>-</sup>YYYY<sup>-</sup>LYF<sup>-</sup>GVGL<sup>-</sup>GGVM<sup>-</sup>VHEGS<sup>-</sup>VQRGAW<sup>-</sup>GNAGE<sup>-</sup>VGHIP<sup>-</sup>VEAC<sup>-</sup>PCG<sup>-</sup>NRG<sup>-</sup>CLERY<sup>-</sup>LSLEAL<sup>-</sup>TEAD<sup>-</sup>WVAE<sup>-</sup>VAPI<sup>-</sup>FHNA<sup>-</sup>VAV  
IENL<sup>-</sup>FD<sup>-</sup>PET<sup>-</sup>VILG<sup>-</sup>LATD<sup>-</sup>LLER<sup>-</sup>LAG<sup>-</sup>STG<sup>-</sup>GLHNS<sup>-</sup>VSIAP<sup>-</sup>RLM<sup>-</sup>VARG<sup>-</sup>GGQ<sup>-</sup>HSVLR<sup>-</sup>GAAAL<sup>-</sup>AV<sup>-</sup>SGV<sup>-</sup>LS<sup>-</sup>P  
B A L P A 2 1  
LSFG<sup>-</sup>VKIG<sup>-</sup>RR<sup>-</sup>SAD<sup>-</sup>LVLM<sup>-</sup>DFV<sup>-</sup>GQIR<sup>-</sup>QIY<sup>-</sup>LGIA<sup>-</sup>APFEL<sup>-</sup>WNWAE<sup>-</sup>EVGAD<sup>-</sup>GAMV<sup>-</sup>WRG<sup>-</sup>VDLQAE<sup>-</sup>IPY<sup>-</sup>PVY<sup>-</sup>LQND<sup>-</sup>ATSAC<sup>-</sup>GAE<sup>-</sup>LVF  
G V G P D F V Y F F I G S F L G G G I V L N S S I F V G R T G T A G A L G P L P V - - - -  
RGRNG<sup>-</sup>TLQEIASIF<sup>-</sup>VLPLEI<sup>-</sup>WIQETAKA<sup>-</sup>LAQAIVAAAS<sup>-</sup>VIDFSA<sup>-</sup>AVID<sup>-</sup>GGFN<sup>-</sup>WVRER<sup>-</sup>VVRAT<sup>-</sup>IKEAAE<sup>-</sup>LDV<sup>-</sup>MEIIE<sup>-</sup>GMV<sup>-</sup>GPQA  
RAIGGASLPIFARYLI

B A L P H A 6  
YFLGLKIGRRSÆELVLIDFLGQPVRIMGIAMPFQLWNWVQYVGAQSEMAWRERDIQTELGLPVHLRNDĀAACGAELVF  
G T G E D F L Y F Y F A Y F I G G G L V L N G H L Y A G R T G N A A G V G P M P V - - - -  
PDRSGRMRNVASMSVLVLSWDLDGAAAGLASAILSASALVEMETVMIDGWMPEIRAEMVRRTHAALHRLDEPPQIREGT  
VGAQARALGAAAIPLSQRYLV  
B B E T A  
FGIGVRLDRMRIETALVNFAGDVIHDTVGVQAQPYNLGSQLREIDLADAFAWAEVDFARELELPVSENGNAAAIAELFYG  
CGRDFVYLFLGPAIGGGIAVDGDCLRGVTGNAGDFAMMPVLPSPKPSGAWDTRASLNGLAVIDEWDCCVDALAPALRA  
VLAVLESPVVLDADTAGLIDTLIARLHTALAALAGTPVLVRGTFGPDAGAIGAAATLPMFFNFSP  
B\_EPSILON SKLYIDIGGTYLRSELLKNGKT--FKEIGISFAGQVD--  
H G K I V S S P N I A V K E Y D I K K Y I P V S L K I D N D L N C A M L A E K E - - -  
DINMALLYIGTGMGSVLEQGEIVRGERNLAYEIGHVPPFFRCGCGKDNCLFSSSGGLYAKKIYQNFQEGLFRAAATLVTL  
ANPKVLVLGGGVHFLKEKVEKIGKIALASNEGLEIKLSQL-KNASIEGAKQL-----  
B D i c l o m i  
NALAIKVGVTHTYLSKIDFAMNIKFLTVGIGIPGIVDNTFKNVVAPNLNWKNLPLGDMIEIPVKMDNEANMAVVAEGLMGTK  
INIVYVYVGEIGTGLILDGKLYRGRYNTAGEFGHMTVLKCKCGNLGCWERYASLGSESEKVLKKYINELAIGLINIINGLN  
PDVILGGPLEFIRQEIKKIVEEKSITSDGKVRIELTSFDYPAELVGAGIWFWDIFEG  
B\_Theae\_2 -----TE---  
IVIGVPGSVDKTHKKLAFAPNLRWRDIDVEKYFVFEVYLENDANLAALAEMMRNKHFNIVYILVREGIGGGIIIIEGKLYKGSF  
NAAGEIGHMKM-PCFCGRVGCWEANTSISHCLAKEVLDEFTGILIDGIVNLVNLSPFVIVGGEGESVFEVIVSETRRQVH---  
KEVSVEKGLSNKEVLEGTSSILSSMMISER  
B\_Acter\_4 R I L A F E I G T F F T R Y V V F E -  
DGRMGIPGIAMSVPGFIDVSKQVAVTAGALMLYKHEIGKELPVPTWMENDANCAAMAELSGNAVDFALITIDTGIGGALFL  
G G G I R R G K D W R A G E L G M M I -  
PNYETGGFNTMQNYLSTIVLRVRKIVDKWIDYLAIAIFNTAAATDPECILLGGGIQQLLPMVNAALDRIPQWGDFTSVKRC  
RHTNNAAGLIGAYAFETEVGGL  
B\_GAMA\_17 Y V I G V S I N T D S A V V C I A D L G C N V L L R T M G F A I A G F F L E N -  
RQINAPEPLDWSLIDLQPI LGMPVWLENNATTAIGESLVGVGANFIYLSFNFGFAGVINGKPYFGSHGNAGEITLYND--  
- - - - -  
EESINRPALGVDTWLARVKPTLDRLVNALAGLDFDPQAVVFGGQLPELGRRLIAATAFWGAHRYPRPQLLLSETNGDAAAIG  
AALVPLKERFFV  
B G A M A 2 3  
YSVGVSVMVDGFAVVLIDFAGQVRFPLVGLSMTGPRIGDGRVNPPLSLEWVMQVELDRFVQLPVWMDNDHAHCAALAEAV  
Y G I G R D L V Y L S I S D G F A A G V I A A G N V R R G A H G N G G E L G R I S A - - - - -  
TGMARPTLQIDAWLDAVEPTVLAVAAIILIDPRVIVF GARLTDLAQRRIARIAFEPAPRRPYPTLQVGQVTAHATV LGAAML  
PFKETF-  
E U B l s t i s  
YFVGIDLGATNAKAGVVNDEGELLQPLIGVSGPTIDFNGVVIKASNFTWDHVPLANLIGVAAVLDNDANAACAAECWIG  
AGKNMVMITLGSIGAGVVVNGRVIHGGSGWAGEPGHAIYTPCGCGQKGCFEKTI CRSIP-----  
PPCEPSRSSLPKLW----TLRRPATR-----  
E U E c p u s 2  
LFVGLDIGGTLNKGVIDTGGQLLERLTGVGCPGQIDREAGVVIGASTFAWHNVPLANLVGRPVTVLNDASAAAASAE--  
F A S R G T I A V L T L G T G I G L G V V C A G R V V T G C R G L V -  
EGGHMIVRLCACQRCLEMYASASAV-----  
B\_FIRC\_15 LAVGLDITKNHFGLLLTNLKG EILFDYIGISFPGIVNLEKEIVSYSHMLGLQLTL-  
LFTEVSYPCFLNDANAGAYAEGINKEFQRFFYLSLSNTVGGAI FNCD ELIQGENFRCGEVGHITVPCYCGKLGCLDVYC  
S A K N L E I L K I W D K Y T T Y L S V A I N N I H M V L D C D -  
IILGGYVSYLENDIRQKVLQRNTFSEDGMFVKTCNYKVGAAAFGAALKVIEAFIKQ  
B\_ALPA\_13 Y F L G I E I G V E H I S A V E I D L G G N I V E P F I G V A V P A Q M D K H -  
GFVRLAPLLRWENVQLAELVSPVVAENDGNAFAIGASYGRNDKVTFLVMESGVGGGIIANGSLFRGANGLAGEIGHLRI-  
- - - - -  
EPSSLEEVLGLEHIGAVSIAEEWARALAFGLIQACRVIDADRILGGSVAAALYPLMAARVAHHIQLAQPLPSIGVNEEETVGP  
FGAACILHQRFLSL  
B 2 A c t i n o  
RIGALEAGGTKMVLAIQTREKIFMPTLGVGAFGPTCVNYGKILSTPKQGVVNYDFL GALGVPIGYD TDVNAACLGEALF  
G S A R N V V Y L T V G T G I G A G V L L G G K L L H G M - - L H P E A G H I P I V - C Q Y -  
HVSCLEGLASGPSIEKQEVWELEATYLAKALAVVYLCYSPQRILGGGVTLFPLIRQKLLNNGYIIDSYVSDGCSGNQ  
GILGALALGLQSLDS-  
B 2 B a e t e s  
LLGGLEAGGTFVCAVGTGPDIRFP TLGIGSFGPVPDYGYITTTPKPGWAHTDVAGTLNVPVAFD TDVNAAALGEQRW  
G A G R T F V Y L T I G T G I G G G V I V N G R R H H G R - - Q H P E I G H L F I H - C P F -  
HGDCLEGLASGPAIPNHPAWDEVAQYLAFGLANLILTLSPQRILGGGVTHLFPRI RRHVAACINGYVLDTFVPPALGDRAG  
VLGALALAEVMSGL  
B 2 C H L O R O  
LYGGIEAGGTKWVCAIGTGPDIRFP TLGIGSFGPVPDLNYGSITTTPKPGWAHTDVVRTLGRPIGFDT DVNVALLGERQW  
G A A R V A V Y I T V G T G I G G G A V V G G K L V H G L - - I H P E M G H M R L I - C P Y -  
HSDCLEGLACGPALADHPAWELEADYLGQALANLLCILSPERIIIGGGVPMFPLVRAATQRWLNGLYLPDRLIVPPALGQR  
AGVLGAIALAMHTAGV

B 2 T h u i u m  
VYGGIEAGGTKFVCAVGTGPDDIRFPTIGIASFGPVDPNYGYITSTPKPGWANTNFAGYIGVPVGFDTDTNVAALGEHRW  
G A A V T F I Y L T V G T G I G G G G L V N G K L I H G M - - L H P E M G H L A I W - C K F -  
HKDCLEGLASGPAIADHPAWQLEAKYLAFGLVNYITLSPQRIIMGGGVSHLFPLIRQRVQHLLNGYIIDQYIVPPKLGTRAG  
VLGAIALAQDVTGD-  
B2\_GAMMA L F G A I E A G G T K F V C A V G S G P D D L -  
FPTIGISFGPVDLQYGFVTSTPKPGWADTEFAGVFDLPVGFDTDVNGAALGEQRWGAAQNFYITMGTGIGGGVAGGK  
L I H G L - - V H P E L G H M F V Q - C P Y -  
HGDCFEGVAAGPAIADHPAWDLQARYVATALASLVCSFSPQRILGGGVAHMLNSVREKTVQLNGYIINEYLVLPLGLGDKA  
GILGAMVLAEQAFDNR  
B2\_SPIRO -  
LGGIEAGGTKWVCAVASSPDCILFPTLGIGCFGPVDVWGWFITTTPKPGWRDTGVAGVFGVPVGFDTDVNAAALGECYSY  
G A A Q N V V Y L T V G T G I G A G V V V D G R P V H G L - - V H P E A G H V L V R - C P F -  
HGDCLEGMASGPALPEHEAWRMEAFYLAQGMNLVAVSPERVILGGGVGHLPFLVRSELLRLLAGYVVEDYLVPPLGLG  
QRAGIVGALVLAARTAP--  
B 2 F I R M I  
KIGALEAGGTKMCAIGDENGNIIPITIGVGCFGPVDLNYGYITSTPKLSWRNFDILGNLNPVIGFDTDVNASALGEATYGIT  
K V S I Y I T I G T G V G V G V F I N G Q L L H G M - - L H P E A G H I L L S - C P Y -  
HQNCFEGLASGPAIDCDEVWLEAYYIAQALNYTCMFSNPKIVLGGGVKQLYPLIREEFKIMNGYILENFIAPSLNDNQG  
ILGCLELANREMRLL  
B 2 F I M I 2  
VLGAI EAGGTKFVCGIGNERGEVLFPITLVGVSFGPIDPIYGYITTTPKPHWGNYNLIGKLDVPMGFDTDVNGAALGESIWG  
A A K N C L Y I T I G T G I G A G A L V G G K L V H G L - - S H P E M G H I L V T - C P Y -  
HGDCLEGLAAGPALVDHPAWEMEAHYLAQALMSYILILSPQKIIMGGGVQDLFPLIRTKLQQLNGYVIEQYIVSPGLGDNA  
GLCGALALAKEKLS-  
B 2 F U O B A C  
IIAAVEAGGTFICGLGTEDGKIIPITMGVSGFPIDPVYGYITKTPKPYWSDYNLIGELDVPMEFDTDVNGAALAESWWGA  
G E N V M Y I T V G T G I G A G A V V D G K M L Q G L - - T H P E M G H I F L R - C P F -  
HKDCMEGMAAGPAIDRNEVWDMEAYYLAQAVVNYTLILSPQRIIMGGGVKQLFPLIRKYVLEFLNGYVIEDYIVYPGLGDE  
AGFVGSIALGKIALENN  
B 2 F U B A C T  
KIAAIEAGGTFICGIGNENGELIPTMGIGCFPIDPVYGYITKTPKPHWSDYDIVGELDVPMEFDTDVNSAALGESLWGAG  
Q S V V Y I T V G T G I G A G A V I N G K M L Q G L - - T H P E M G H I F V K - C P F -  
HKDCLEGLAAGPAIERNEVWEMEAYYLSQALVNYILILSPQKIIMGGGVSHLFPLIRKVMVRETLNGYVIDNYIVYPGLKENAG  
LMGSLALGRLALENR  
B 2 P L N C T O  
LWGAIEAGGTFVVCVGYGPGELLFATLGVASFGPVDLHYGQITTTPKPGWQNADILGPLGPIALDTDVNGAALGEHRW  
G A A Q D F V Y I T A G T G I G G G M A R G R L L H G M - - V H P E M G H L G L A - C P F -  
HGRCWEGLCSGPAIPDDPAWDLTIRYMAHALANITYVLSRPRKIILGGSVEALFQQLRLRLREVLAGYIETVFPPTLGDDA  
GICGAIALAAQIEPP  
B D E L T A 5  
FRGAVEAGGTKFVCAVAGLDDIRFPTLVASFGPVDLDYGRVMTTPKPGWSGFDLLGALGRPIGFDTDVNGAALGERE  
W G A A R D F L Y V T I G T G I G V G G L A G G R L L H G L - - T H P E M G H I G L V - C P F -  
HGDCWEGLCSGPAMADHPAWEHEAAYVAEALATVYALSPRRKIILGGSVEGFFAKVRERFVATLGGYLVAEYIVPPGLGEL  
AGVAGAYCLACAAPGGR  
B G A M M A 8  
YLAGIEAGGTKFFFTTIGDFDGNVITDTIGLACFGPIDINYGYITNTPKIAWQNFIDIVNAVSGPIGFNTDVNAAAICEKLWGCAQ  
N L L Y L T V G T G V G G G I I C N N K L V Q G A - - M H P E I G H L L I S - C P F -  
HGNCLEGLASGTAIDDHIAWQFEAEYLAKAIVNYICSFSPERKIILGGGVTLFDMIRKNVTKYLNLYLMTKFIVPASFGDNTGV  
KGLALALETFNNS  
B 2 A L P H A  
VFAGVELGGTKVMVGFSGPDDL SIPTIGVATFGPARLDWGRILPTPKPGWTGAVIAPRLGVPVAFD TDVAGAAMGEGHW  
G A A Q D H A Y V T V G T G V G V G L I V N G M P L H C A - - L H P E A G H I K V V - C P F -  
HGDCLEGLVSGPALADDPVWDLVADYLAQAMATLCFVAAPRRIVIGGGVPTVLAATRLRLRDELGGYLIETFLVPPALGDR  
SGVLGAIALARALHDTS  
B A L P A 2 7  
RIAAIELGGTKVMVAFSGPDDL SIPTIGVASFPIRLDWGHILKTPKPGWVSHADVAARLDRPLALD TDVNGAAVAEGLWG  
A A K D Y A Y V T V G T G V G V G L V V N G A P T H G L - - L H P E A G H I L V S - C P F -  
HGDCLEGLISGPALKDDPVWALVADYLAQLVANLALIASPRRVIIGGGVQQLLEQTRTRLQTHLAGYLIDAFVAAPGLGANS  
GLLGAVALGLRHDAIL  
B 2 G A M A 2  
LYAGIELGGTKTICLIGTVDSIRIPTIGIGAFGPVNIDYGCIESTPKPGWSHTSVVPPFFSPPINLDTDVNAAAIAEHQHNGK  
N F I Y I T V G T G I G G G A L I E G A P V R G N - - S H P E M G H I A L A - C P Y -  
HQNCAEGLASGSALPEHPAWDMQASYLEFFHSLTLLFSPQRIIVGGGV-  
QLLARVRTALYKKNLNGYVLESYLCLPELAGNAGPLGSLMLAYPEYRRH  
B F I R I C 2  
LYGSLEAGGTFVCAVGDENFNVFPTLAVGSGFPIDIDYGFITTTPKPNWANVDLLGALNVPMYFTTDVNSSAYGEMVNN  
A G G N L V Y Y T I G T G I G A G V I Q R G E F I G G V - - G H P E M G H Y Y V V - C P F -  
HKGCLEGYAAGPSLLNNPVWVQAYYIAQAAVNATVTRPDVIVFGGGVQHMLDRVREKFTSLLNGYLVRDYIVTPAVGN  
GSATLGNFVLAKEVSK--

E U A c o e b a  
VFAGVEAGGTSFSVGLARSÄEISFFPTLGIASFPGVDLDYGYITTTTPKPDWGNVDVLSRFNVPTAFETDVNAPAVAHLA---  
Q F S C A Y I T V G T G V G V G I A V E G K P V H G L - - L H P E M G H I F V T - C P F -  
HGACVEGLVASRALDDREEDWHDVAYYLAQLCAALVLTSPHRIVMGGGIPTILPLVHKHVLALLNGYIIGNYITLSPFGGNAG  
LVGACELARLALPHN  
E U D i l i u m  
KFLGVEAGGTSICLSIAIKPSN̄IIPITIGIASFGPIDLDYGYITTTTPKPNWGQTNILGWFKCPKGFDTDVNGAAISETFHGLHK  
S C A Y I T V G T G V G V G C V V N G S C I H G L - - V H P E G G H S F C T - C P F -  
HGNCIEGLVSTGAIDDPVWLIIGNYLAQLCANITCLLSPQVIVLGGGVSIYPIIRTETIKILNGYIIDQYIVQSPFASHAGSIG  
LELARRALIKN  
E U P o l i u m  
VYAGVEAGGTGFTLAIASPD̄N̄IPIPTIGVASFGPIDLDFGFITTTTPKPMWGNTNILGWFKCPKGFDTDVNGAAISETFHGR  
H E S C A Y I T V G T G V G V G V V A N E K P I H G L - - V H P E G G H I F T T - C P F -  
HGNCIEGLVSTGAIDDPVWQIVGHYLAELCATITCIMSPQVIVLGGGVTIYPIIRDELLKILNGYIVHKYIVQSPFGSNAGIV  
GALELARRAHLEK  
E U P h t o r a  
RFAGVEVGGTTWVAIAEHP̄EN̄ILVDTIGIASFGPVDLNYGYITSTPKPNWGNTDVGVDVPIGFDTDVNAPALYEVAYGG  
H G S A V Y I T V G T G V G V G V C T N G S A I H G F - - M H P E G G H I I V V - C P F -  
HGDCIEGMVASGSIDDDPVWDTIAHYLANLCINVTFITSPDVIVIGGGIEKFLDLIREKFVARVNKYG-----  
E U N e l i u m  
YIAGVELGGTSCVAAIAENPT̄ĪVSTLGIASFPGPVDLKYGYITSTPKPGWKYVEIVGVFGTPIAFDTDVNAPALAEMAALN  
T T V I Y I T V G T G V G V G V T V E G S P V H G L - - L H P E G G H I I V C -  
CAYGHECCVEGMIDSQAIDNNPVWVGYLALCLNITYLLSPNLIILGGGIRILYTETRHWFKELLKEYLLASYIKEPFHG  
SKAGIVGALELARHK---  
E U M i l i a  
RFAGVEGGGTTWVCAVAEDP̄DAIVFPTLGIATFGPLCLDYGTITHSPKPGWTRVDVLKRLDCPVAIDTDVNAPAASELAFTA  
A D N L A Y V T V G T G V G V G I I V G G E P V H G L - - V H P E A G H A R V A - C P Y -  
HEDCVEGMCSAAAVDDDDAWDATAHYVAGLCANLITTSQPRIVLGGGVRALVSKIRVHVKAQLGGYVLRILVSSRRGN  
DAGVVGALTLAKGAAEKA  
E U M i a s s p  
RFAGVEGGGTTWVVAISEVP̄EN̄IVFPTIGIATFGPVDLDYGYITHSPKPGWADVDVLGILDPCPAGFDTDVNAPALSESEGA  
E D N L C Y V T V G T G V G V G V C G G Q P V H G L - - S H P E A G H I R V G - C P Y -  
HADCVGEMANASAIDDHDAWDAAAHYLAGLCSVLVMTASPQRIVLGGGVKTLVTKVRAQLKRQLGGYVLFVIVSSKLG  
DAGIVGALVAEKAKADW  
E U E c r p u s  
IYAGVEGGGTTWRVAIADHP̄T̄N̄ITFVTLGIGTFGPVDPYGYITSTPKPGWNMVDVVGYSVPCKFDTDVNAPALAEFMW  
G A K K S C A Y I T V G T G V G V G L V V N G Q A V H G L - - M H P E A G H L C L V D S V F -  
GGASVEGLASTVALSDPVWEATAHSLAGLCSVLVSPERIVLSSGGVTLLYDKVRKWTRELLNGYIVDDYITPSSFGQN  
AGMVGSLTLAHAYEEA  
E U M o s i g a  
VYAAVEGGGTSWRAAIAVRP̄DN̄IVFKTLGIGTFGPIQPDYGCITSTPKPFWKNKVVQTLGIPHLFDTDVNAPAYAEFLHAT  
N P S L A Y I T V G T G V G I G L V I N G Q P V H G L - - L H P E G G H M L I V - C P F -  
HKDCVEGLVSAPALDDDFIWDAADALANACANLLLTSPQAVISGGVACLFDKVRARTLELLAGYVPEEVIRPSTWGNN  
AGIMGALHLSKTALERS  
E U O s c u s  
KLLGIEGGGTTWIARAIEVEGḠSS̄FETIGVATFGPLELNYGYITTTTPKAGWQDVDVLGSLQVPLAFETDVNAPAMLEHRHV  
H L V S C C Y V T V G T G V G V G V V C N G L P V H G M - - L H P E A G H M F V T - C P F -  
HGNCVEGMVGSALDDDDIWEHAAHYLAGMVCNLLTLAPERIVLGGGVECLFSKIRANVRDILQGYYLLRFHIVPPAWGYQ  
TGLTSALYLAERALQRE  
E U O s u s 2  
KLLGIEGGGTTWTARATSVD̄AḠTVFNTIGVATFGPVELNYGYITTTTPKPGWEDVDVLGALDVPLAFDTDVNAPAALHNRV  
H R A S C C Y V T V G T G V G V G V V A N G R P V H G M - - L H P E A G H M H V T - C P F -  
HGNCVEGMCGSNALDDDEIWDQCAHYLAGLCANLITLAPERIVLGGGVECLFSKIRAKTRELLNGYLLRFHIVPPAWGYE  
TGINSALFLAENALKRE  
E U T e o n a s  
VVAAVEAGGTTFFVAVFAAP̄V̄T̄PLMATVGVASFGPVDLNYGFITTTTPKAGWANTDVVGTGVPVAFETDVNAAAALERMA  
G A G A A F V Y V T V G T G V G V G V A L D A E A V H G L - - L H P E A G H M C V V - C P F -  
HAWCVEGYVASGGLDDDVGWDAVWYLAQLVINVTLVSPHTVVLGGGIRSLYARVRSHVHTLLNGYLIEAYLRPRL-  
AEPGLTGAALLV-----  
E U P a c i u m  
SKAALEIGGTFIQVGIGTKD̄N̄LNFDTIQIASFGPLCLNFGSITSTPKLKWQNFPIATRLKPKFAIDTDVNACAMAEFMLGNH  
N S L A Y I T I G T G V G V G I I V N G Q C V H G M - - L H P E G G H I L V V - C A F -  
HGDCLEGLCTNVAIDDPHPIWELVGFYLAECQNILYLLSIEKIVLGGGVKLLYPIIDKHLRRLVNKYV-ENYIVEPQV-  
EDVGLIGALLLQ-----  
EU\_Temena RIACIELGGTSIRLAIGI-----  
IETVGIASFGPCLDYGFITTTPKVSWKNFPLLRVTRIGFDTDVNAAAACAEYNFGNHKSLAYITVGTGVGGLIVDGKCV  
H G L - - T H P E G G H V L I V - C K S -  
HGNCVEGMVTNHALDSHEIWNSVAYYLAQLCLNLTLISSPEVIVIGGGIQPLLGLIKQNFIKLLNQYVIDDYIVKPF-  
TDSGLVGSMMV-----



E U N a r i a  
 LIVGIEGGGTSYKVAIGLNIEH̄MITEIGIANFGPIDVNVGCILPTPKVSWRSFNIVEYFVKHVQFDTDVNGPAMA EYQLVKĠ  
 S S L A Y V T I G T G I G V G L V I N G S T V S G L - - M H P E A G H I Y T F - C T F -  
 HTECLEGMAASPSIDDEIWDIEAHYLAHLVCVNLILISSCQVIVMGGGISILFDKIREKTVQLLNGYHIKNIKPSVYGEHAGIK  
 GALHLSQL-----  
 E U T r o n a s  
 YACGIELGGQTASIAICEKVḠĒIYIKTIGIASFGPLDLYKGSIGNTPKPNWGFYPLVKKIDCKVSMETDVNAPAYSEYLHLKEQ  
 S V G Y V T I G T G V G V G V F C D G K P L H G R - - M H P E C G H I M A T - C P F -  
 HGACFEGLISAQALDSDPVWDIYIEYVAQLTVTMSYVYSLDAFIIGGGIEWIFDKILARSQQLINNYI---  
 IISKPFHGADAGLVGACAVAINPDVFA  
 E U T r a s 2  
 YACGIELGGQTAFAICENLḠS̄LYIKTIGIASFGPLDVYKGSIGNTPKPKWGNYPVASIEAQVVLETDVNAPAYSEYLHLNS  
 K S V A Y A T I G T G V G V G V F C D G K P L H G K - - M H P E G G H F K P C - C P F -  
 HGDCVEGMISAVALTDDPVWDCFTEYAAQLSANCALLYSLDYMVIGGGIEYLIEKIQKRTKELLNGYI---  
 KVIKPFYGGDAGLVGATAVALHPDVFT  
 E U T r n a s 2  
 YLCGIELGGTSSSAAIIDEDḠK̄VLITALGIASFGLNVESGTIGKSPKKGWYFHVKAEFDIPIAMETDVNAPAYSEFIEFSKK  
 S L A Y L T I G T G I G L G L Y S D G S I Y H G R - - L H P E F G H T Y I V - C H I -  
 HGDCAEGLISASAINDHPIWDLYVEYVVSQIVANAALAYSLDVVFVIGGGVGFYDRIYSRASELINDYI---  
 LVVRPHFDRDAGLIGATVIARRKFNKI  
 EU\_Phylum -----  
 ILIDSLGIACFGPLGVNYGRILASPKAAWRGVLLTPLALVTRVDTDVNAPALAEYYSASSSIAYVTGTGVGVGLVVHGGQ  
 P V H G R - - M H P E G G H V A V N - C P Y -  
 EGVTVGLASSVALDDHEVWDHAVNALANLCVTLTLLTSMEKIVMGGGIALLLPRIQARTVELLNGYLMSTLIATSSFGDDI  
 GLIGAMVLAQSSSLQLN  
 EU\_Thsira -----VGIATFGPAGVNYGRILESPKREWRGVDLITPIDALVGFDTDVNAPALAEFR-  
 H R Y K S L S Y V T I G T G V G V G L I V N S Q P I H G L - - L H P E G G H V S I - -  
 YSWGSEKPEDGSSGGDSNDDEHVWNHASNAIANLVCVSIILLTSCQKIVLGGGISILFDKIRHRVWVLLNGYLLADLIVESS  
 WELGSGLVGAFALALDA----  
 EU\_Sopora IVAGVELGGTKSIAVIGR-GREIIVPTIGIASFGPISVADGTMLPTPKPHWAGAEIVAPLD-  
 KVAFHTDVTGAALGEGAFGAAVDFLYVTVGTGVGMGIIAGGRPVTGV--MHPEAGHIRVA-CPF-  
 HGDCLE-----  
 B A c t e r i a 2  
 AGIGAEVGVDF̄LAVCAVDLRGRVVRVYLAVAVPGLVARDGRTVVRAPNLDWHDADLGALLDLPTVDNĒANFGALAEWL  
 G D G T D F L H V S A E I G I G A A V V F D G R L C A V P A G S P V S W G M C R S P G A P A V G A G - - -  
 AWNSTPVRDVRRALREAGTALGIALTGAVNLLDPEAVVLGGALARRVPPARSRCPSWVR-----RAA--  
 ARSRALRGPVLDPPGAVAE  
 EU\_Crdium F S A G L N I D R D H L T L V V L D L S G Q I R A E I L G I A L P D E L G - -  
 TLAFPGPLTYAWARTDAADLFAGPTFVENDAVAAAIGEAFQGHLSFVYVLLISVLLGGGVIDRT-----  
 -----  
 B\_FIRC\_14 V S L S L Y L E G F E I Y W F I T D H C G N K I - - - I M I G I A S N I N - -  
 SGKITSHMEYELYDIDVIKYLEIPINVENDMKVAARGYWARHENKAVASIYMGNGMGSNMVIDGKIWSGTSNFAGEIHYLPI-  
 -----KKPMY-----EFNDIDTNIVQYYGKIIQSYIALINPNLIVLYS--SYIIDEIKFYCKCRIPEN-AMPKIIISEY-----  
 GLSKMANELMD--  
 B\_FIRC\_4 L G L A I F L E K N E T N Y T I F N C L G E V K - - - I S I G V P G S V D - -  
 NGRIFYIPGYKFQNFNLKSHLSMPVVIENDMNAAVLGYKNTGNYSLVLYSGNGPGAGIMVNGDVVRGSTFFSGEISFVP  
 Q----YDNKNFLQALRSE---DSNNPEEYNIDAITRLIATCIAIINPHGFIFCDEVQFVIDQIVKSCPQYIPAE-HIPKITVSNW-  
 KEDYLYGLKSLGLDLMITR

**cytidil domain alignment, philip format**

71 152  
 B\_ IPARLGSTRLKEKPLKNLLGKPLIRWVVEGLVKTG--ERVILATDSERVKEVVEDL-  
 CÉVFLTPSDLPSGSDRVLYVVRDLLIINYQGDEPFVYEEEDIKLEDVKKVRSPIPKHVGIYGRKETLEQLRLLLENGIHKVLITE  
 NYHGVDTTEED  
 B\_ 4  
 IPARLGSTRLPEKMLADIEGEPLIVRTW̄RQAMQCCRASRVVATDSVKIAEVLTT̄YGAEVVMTSPEARCGSERIAEAARQF  
 VVNQLQGDEPLISHETIDLNQKVVRSPIPRHVGLYAFKAEVLEQLRLLHEHYIRCMVTHDDQPGVNTAED  
 B\_ 2 IPARIGSTRLPQKALAEIAGKPMIVHVAEQAKKAA-  
 FGRIIVATDHNNIAKVVTAYGHECITCRDHKSGSDRIYEALTHIVILNVQGDLPITPHEIISNIVKIIRATAPHHIGIYAYRREALE  
 QLRALAHNMIDVEIVDTIPLGVDTQRD  
 B\_ 3 IPARLGSTRLPNKPLADICGKPMIVHVADRAAAAK-  
 LGRTVIATDSEEIFKVVAAHGHEAIMTRGDHESGSDRIYEALAKLAVVNVQGDLPITPDIIRNVVKIVRATAPHHIGLYAYR  
 RSALEQLRALEAGMIDVEIVKTVPLGVDTQAD  
 B\_ 11 IPARMAATRLPGKPLLDIGGLPMVVHVLRRRAETAG-  
 IGRVAVATDTPEIAAAVTAHGGEAIMTRADHPSGSDRVFEALDRLTIIINLQGDFTIRPDIIRDNVVKAVRATAPHHIGLYAYRR  
 KALEQLRALEGGMIDIMIVDDVPRGVDTAAD  
 B\_ 9 IPARMQATRLPGKPLADIHGEPMIHVVRRSVQAG-  
 LGPVVACSEAEVFDVAHAGGGQAVMTDPDHPGSDRVWEAVRKLAVNVQGDLPITLDPQIIRANVVKAVRATVPHHIGL  
 YAYRRDSLEQLRALENGMIDCALVDTVPLGVDTPAD

richoplax IPARLAARLPNKPLIDIEGVPMIIRVYNKALEAN-  
IGKVVVAGCNDELRLNLSYNFNISTDPTLPSGTDRVYAAYKNLNVINLQGDMPHINSMTIKKNTVKVIRYPVRKHIGIYGF  
KVNLSLEQLRALENGMIKVAITNDPNISIDTEQD  
B\_\_13 IPSRLSSTRLKQKPLQLIGSITLIERVFKQVNAQAG-  
LEHTYVATDSEEIASVITKVGKVIPTDSAIPTGTDRTYEAFKLIYVNVQGDMPFIEPSSILKSNVTVVRSLIPYHVGMYGFR  
KNALEQLRALENGMIGTCLVENVPISVDTEED  
B 5  
LPSRWGSSRFPKPLAKILGKTLVQRSYENALSSQSLDCVVVATDDQRIFDHVVEFGGLCVMTSTSCANGTERVEEVSR  
HIVVNIQGDPECLSPVIDGHKVKCVRSAPLHIGVYAFRKAFLEQLRVLEIGRIYVHVQATGPSVDYPED  
B 4 6  
LPSRWGSSRFPKPLAKILGKTLVQRSYENALSSQSLDCVVVATDDQRIFDHVVEFGGLCVMTSTSCANGTERVEEVSR  
HIVVNIQGDPECLSPVIDGHKVKCVRSAPLHIGVYAFRKAFLEQLRVLEIGRIYVHVQATGPSVDYPED  
B 6 1  
LPSRWGSSRFPKPLAKILGKTLVQRSYENALSSQSLDCVVVATDDQRIFDHVVEFGGLCVMTSTSCANGTERVEEVSR  
HIVVNIQGDPECLSPVIDGHKVKCVRSAPLHIGVYAFRKAFLEQLRVLEIGRIYVHVQATGPSIDYPED  
B 8  
IPARYASSRFPKPLAKIGDKTMIEWTYRNASRSSVLSLVVATDDVRIHEVVQKFGGRSVMTSSDHPSTDRRIEVANQFII  
VNIQGDPEGIEPELIDGNRVKVIKSLIPRHLGIYGYDRDFLEQLRAIEAGYIGIYLSKEAGLSVDTPAD  
B\_\_19 IPARYSSTRLEGGKPLKMIEGHTMIEWVYKRAKKSND-  
LDALIVATDDDERIYNEVINFGGQAIMTSKNHANGTSRIAIEVCEKMTVINIQGDEPLIEYEMINSNNVQVRSVIPKHIGIYGYK  
RDFVEQLRVLENGYIKVLETTSHLIGVDTQEN  
B 3 7  
IPARYSASRFPKPLMKDLGGKSVILRTYEAIAIKTGLFEAVYVVTDSSEIIQENIANAGGDVIMSTAETHQCGSDRIAEAVAFIVIN  
VQGDPEPFIDKVSLSKNNVVIKSVIPKHKGVAFRKQALEAIRYQELGKIKMVETTIESVGDTPED  
B\_\_7 IPARYHSSRFPKLLQEINGITVIERVYRQALLAE-  
PKSVIIATDHDEIADRAIQFGAEVITSHHTQTGDRIAETIAKGVIVNVQGDPEFIRPKLIQQNVVQVRSAPRHIGLYAYRA  
AFLEQLRILWVSGFIRVDEACEPLQDINTKED  
B\_\_12 IPARYASTRLPGKPLQDIAGQPMIQRVWNQARKSA-  
ASRVVATDDERILAACQGFAGAEALLTRAHNSGTDRLIEVASRLIVNVQGDPELIPPALIDQNVVQVRSAPRHIGLYAY  
RVGFLEQLRALWHGVHIVADARNMLPGVDTPED  
B\_\_14 IPARFSSTRLPKPLVDINGKPMIVHVLERARESG-  
AERIIVATDHEDVARAVEAAGGEVCMTRADHQSGTERLAEVVEKCVIVNVQGDPEMIPAVIIRQNAVQVVRATIPRHLGIY  
YRAGFIEQLRVLWYGEIHVAVAKVPGTGVDTADD  
B\_\_18 IPARYQSTRLPKPLADIGGKPMIQWVYEQAMQAG-  
ADRVIATDDERVEQAVQAFGGVVCMTSPNHQSGTERLAEVVAKMIVNVQGDPELIPPAIIRQNAVQVVRATIPRHIGLYAYR  
AGFIEQLRVLWHGEIHVAVALAPPAGVDTPED  
B\_\_26 IPARFASSRLPGKPLADIAGKPMIQHVFEKALQSG-  
ASRVIIATDNENVADVAKNFGAEVCMSTSVNHNSGTERLAEVVEKLIIVNIQGDPELIPPVIRQNAVQVLRVSVIPRHIGLYAYR  
AGFIEQLRVLVNGEIHVELAKVPAVGVDTAED  
B\_\_21 VPARLASTRLPNKPLADLGGKPMVVRVAERAREAG-  
AQQVLVASDAQRVLDVAVREHGFDAVLTRADHPSGTDRLAEVAALKLIVNVQGDPELIDPQLVRDNYKVVRAPIPRHIGLYA  
YRARFLEQLRAMWHGEIAVRVTEAPEAGIDTPAD  
E U r y z a  
IPARFASSRFEKPLAPILGKPMIQRWERTVMLASSLDHVVVATDDERIAECCRGFGADVIMTSESCRNGSERCCEALQKL  
IVVNIQGDPELIEPEIIDGNRVKCVRGLIPLHLGIAGFDSKFLQKLVLENGYMKVIKVDHDAHGVDAPED  
o m i t r e l i a  
IPARFKSSRFEKPLVHIMGKPMIQRWERTVQAMKCTSLQAIIVATDDDRADCCRGFGADVIMTSENCQNGTERCNEALEK  
LIVVNIQGDPELIEPAIIDGNRVKCVRGLIPLHLGVQCYDAKFLEQLKLVLENGFLKVIKVDHEAHGVDTPGD  
mitrella2 IPARYKSPRFEGEPLVHISDIPMIQRWERTVQAKQFTSLKAVVVAIDDGRIADFYRAFGAD-  
VMTSENCLSGTERCNEALEKLIVNVQ-----NWKINRALIPRHLGMQCHNAEFLE-----  
B 1 0  
IPARHASTRFPKPLAIIAGRTMIEHVWRRRCQEAQAFDEVVATDDDRIRAAVEGFGGKAVMTSPACATGTDRAEVALG  
RIWVNVQGDPELVDPATLQRHVVKAVRSLVPGHIGLYGYRREVLEQLRALEHGIIRCAKVTSTHTVAVDLPDGD  
B 5 6  
VPARLQSSRLPNKVLADIGGKPMIQRVLERCSEAQGVAVLCTDSTELQTLAEGWGFPVMTSESCNSGSERIASVAHP  
LAVINVQGDQPFIEPAVIDANVVKTLRSAIPGHVGMYGFRGDVLEQLRLIEAGLIATFRVEGTSLSDVDTAEQ  
B 5 8  
VPARLQSSRLPNKVLADIGGKPMIQRVLERCSEAQGVAVLCTDSTELQTLAEGWGFPVMTSESCNSGSERIASVAHP  
LAVINVQGDQPFIEPAVIDANVVKTLRSAIPGHVGMYGFRGDVLPSCRWTPPN-----  
B 3 0  
IPARMGSSRFPKPLALIHGVPMVGHVAFRTAMSRCLSATYVATCDTVIEDYCKEASLACVMTGDHHVRCSTRTAEALLKII  
VVMVQGDPEMVLPGMIDANEVKKVREPIPKQVCIIPFRDYLDMMRILEHGEVVRMPTDARTWSVDTPED  
B 4 4  
LPARMASSRFPKPLVKISGLMIEHVRRRVEMSSSVDEVVATCDEIHKQRVESFGGKAVMTSDVHRGCIDRVAEAALYVI  
VIVVQGDPELILPAMLDNAPKVVREPIPKQLGVIAFRNDFLDMNRAVEHGYVRMVLTEGIMIGVDVPGD  
B 4 8  
IPARMASSRFPKPLFPILGRPMIEHVFERAKLFRWDALACTCDEEIRAFQSKGYPVIMTSDKHTRALDRVAEAATKCI  
VLNVQGDPEMMPHDMIAADALKIIRQPIPRYIGIFGKWFDFLDSNRLYDYGHQHIAPYPRPSFVSDSPHD  
B 2 0  
IPARHASTRLPGKPLLDLGCVPVIVRQYRQCIQAVDAEHVAVATDDERIRAVCEGEGIRTLMTSSRCLTGTDRVAEVAGQVIF  
INVQGDPELFPDDLRSVVKVRAAIPRQVCAYAFPRAELEILRFLELGGWVKMIEMSDQSSISVDNLED

B 3 6  
IPARHASTRLPGKPLLDLCGV̄PMIVR̄TYRQC̄IAVDAEHV̄L̄V̄ATDDERIRAVCEGEGIRTLMTSSRCLTGTDRVAEVAGQVIF  
INVQGDEPLFNPDDLRSVPKVVRAAIPRQVCAYAFPRAELEILRFLELGGWVKMIEMSDQSSISVDNLED

B 2 5  
VPARYASTRLPGKPLADICḠK̄PMIQHVYERACKVPYIDDV̄IV̄AVDDRRVAEVVESFGGKVIMTSTQHDSGTDRLVEVMGKY  
IYINIQQDEPLIRSEDIALNTVKVVRSPIPKHIGVYAYRKETLEQLRLLDAGIIRVFEVPETGPGVDTPPEC

B 6 6  
N̄AN̄LVDECVVACDDESIMQTCQKFH̄IKAVLTSKHHNSGTERCLEAARILRVLNLQGDPEPFLEKEVILANLVKVVRSRSLIPGHIG  
IYGFHKEILEQLRALYYQKIAVKIVQSES̄VGIDTQED

B 4 9  
IPSRFASTRLPEKPLVKIAGK̄EMVLRVAEIANVCNKVENYIV̄ATDHEKIVNFCKENNIAMMTSENCKSGTERCWDVTTKIFI  
VNLQGDNPLCPPWFIEQSGTTVEKAMIPRHIGLYSYTYDALEQMRFLHNRIVKMIDVDKSMMSGVDSPED

r o m n a s p  
IPARYNSRRFAGKPLALLGGKPLVMHVYRNACKAKCLDACV̄VATDDDRIAKAVRDNGGEVIMTDAACETALERCLEVV̄RKL  
VVVCIDADEPFVQPHHIEDTVKVVREPVPVRVGIQACGTD̄FLEQNRVVFAGYV̄KVDV̄VET̄FV̄PGV̄KTPED

O s t r e o l u 2  
VSAPYEDDQFAGKALMIVHGKPAFARAAESMKRCARLDRV̄VATDDYRIVETAKEYGIETV̄LVAQDARRTASTYARQAACL  
FVVTLKVDECLIDADSVDATRPRCVRAVIPHVLGCSCYDAMYLEALNTLENGYIKVCPV̄NQ-TPALRAPED

O s t r e o t a u  
AHAPRRNGRYEGKPLALIHGKPAFARLAETMKRCTRIERV̄VATDDYRVAETAKEYGIETV̄LVAPEVARTSTVYAREAAKAY  
VCVVDVEECLLDADSIDAIRPRCVRAAIPGIVEATCFDAVYL̄DALNALERGYIKVCHVNQ-V̄PPLRDPKD

r o m n a s p u  
IHARCDSKAFPGKPLVDVAGAPLVWRTFLKVRGAKCVS̄RCV̄VATDDDRARVVAALGGEV̄VRVSGKWGSHTAAAVGAKK  
NQVV̄VCDADEVGIDAHLVERDAVMGTRPGPPRKVGARSYRVS̄FLEEREAAACGRVKREVAESVPRV̄GTREE

B 1 5  
ILARQNSKGLPLK̄NL̄RKM̄NḠĪS̄LLGHTINAAISSKCFDRIIV̄S̄TDGḠLIAEEAKNFGVEV̄L̄RPAELASDTASSISGVIHATVTL  
LQPTSPLRTGAHIREGSV̄VSARQQLPPNGAIYINDTASLIANNCFFIAPTKLYIMSQDSIDIDTELD

B 1 7  
ILARQNSKGLPLK̄NL̄RKM̄NḠĪS̄LLGHTINAAISSKCFDRIIV̄S̄TDGḠLIAEEAKNFGVEV̄L̄RPAELASDTASSISGVIHATVTL  
LQPTSPLRTGAHIREGSV̄VSARQQLPPNGAIYINDTASLIANNCFFIAPTKLYIMSQDSIDIDTELD

B 3 8  
ILARQNSKGLPLK̄NL̄RKM̄NḠĪS̄LLGHTINAAISSKCFDRIIV̄S̄TDGELIAEEAKNFGVEV̄L̄RPAELASDTASSISGVIHATVTL  
LQPTSPLRTGAHIREGSV̄VSARQQLPPNGAIYINDTASLIANNCFFIAPTKLYIMSQDSIDIDTELD

B 3 3  
IPARAGSKGIKDKNLQLVGGV̄SLVGR̄TILAAQESGMFDQIV̄V̄TSDGENILKEATKYGAKPVARPESLAQSDTRTIDAILHCTA  
ALLQPTSPLRNALDIRNKS̄VVSARQQLPANGAIYINDIASLFEEKRFFIAPMR̄FYLMPYRSIDIDSTLD

B 2 3  
IPARKGSKRIKWK̄NIVPLAGS̄PM̄LEYTVKCALNSKYIDR̄V̄V̄S̄TDSYIYIKLAKKMGADTFIRPK̄NLATDDAKTIDVLLHAYLV  
LLQNTSPLRKS̄WQVDEDSL̄VSIK̄N̄KFRINGAIFINKIDKNFNSDTILT̄N̄QLPYIMKETSIDIDTIED

B 2 4  
IPARGGSKGIPHK̄NIMK̄IDK̄P̄L̄ISYSIEAAKSKSYIDYILV̄S̄TDDVDĪKEV̄SL̄NYGAKV̄FL̄R̄P̄NEISTDRAKSIDV̄VL̄HḠYV̄VL  
LQPTSPLRTSKDIDDDSL̄ISVR̄QEL̄PFNGAIYINKV̄YML̄QNK̄KEFIDENTIPFIMDKKSIDIDNMID

B 3 9  
IPARGGSKGVPRKNIRLLLDK̄P̄LIAYT̄IETALEV̄DFLDKĪV̄S̄T̄EDLEIAKISMEYGAEV̄FL̄R̄PYELATDEAKSIDV̄VL̄HALILLQ  
PTSPFR̄N̄SEDIK̄T̄KAV̄SV̄R̄QEL̄VINGAIYIAEW̄NYL̄KQNR̄T̄FFGN̄ETYAYIMPERSIDIDTEMD

B 4 3  
IPARGGSKGIPRKNIK̄LIAGK̄P̄L̄IVW̄TIEAALKSKHLTSIV̄V̄S̄T̄DDPEIAEIAEQSGASV̄FL̄R̄PAELATDYSSGIDP̄VL̄HAYV̄ML  
LQPTSPLRTSADIDDNSV̄SV̄R̄QDSPL̄NGSIYL̄SEV̄NYFREK̄K̄FITDDT̄LAYL̄M̄SENSIDIDDMID

B 4 5  
ICARGGSKGLPGKNRPLAḠR̄P̄VIAWSVEAALGSS̄LIDR̄V̄V̄S̄TDDPAIEVARAAGAEV̄FL̄R̄PAELASDTASLYDVIFHAH  
VLLQATSPLRIAADIDGPAAS̄LRQDL̄PPNGAV̄YVAETAWL̄RRER̄N̄FWKAGTL̄GYV̄MPERSVDIDSLLD

I C R O M O N A S  
ITARGGSKGIPGKN̄IDL̄NGK̄PLĪQȲTIEAALSSKQLDR̄V̄L̄S̄T̄DS̄DEIAEVAQ̄N̄CGCEV̄FR̄P̄SELAADDSSHLACIV̄HAFV̄V  
ILQPTS̄PFR̄KSIDIDSD̄M̄V̄L̄SV̄R̄QK̄L̄LENGAV̄YV̄L̄RTQ̄SL̄PNV̄GS̄FR̄SADTKGYEMPERSL̄DIDN̄PFD

B 4 2  
IPARAGSKRLPGKNTRLLAḠK̄P̄LIAHTIVAALQSSCCEĪV̄V̄S̄T̄D̄SKQIADVAVQYGASV̄W̄L̄R̄SEDLATDTS̄DVIHTVIDL̄SVL  
LLQPTS̄PFR̄K̄PETIR̄HKS̄V̄SV̄EN---L̄NGSIYIATAK̄QIEN̄K̄SFYSEPTK̄PLLL̄N̄SESIDIDTPID

B 3 2  
IFARGNSKGLPGKN̄IK̄L̄ḠTK̄P̄LLAHSIDVARSVREISKIFV̄S̄T̄DCKAIAIDVAQ̄QYGAEV̄IWR̄PEELATDNSPEWLAWQHAFV̄  
VSLPAT̄SPL̄R̄STEDV̄QNDIV̄VTARQDAPMTT̄VAYV̄TR̄PEYIL̄GNERL̄FAGV̄VRSIV̄V̄PERAIDIDDIYD

B 3 5  
IPARGGSKGVPAK̄NLAAVGḠV̄PLVARAVRACLDAPLV̄THV̄V̄S̄TDDPGIAAVARGAGAEV̄L̄R̄PAAIAGDTATSES̄AVL̄HAV  
VLLVQCTSPFISREDIEGDSAV̄TVR̄QDR̄PETGAAYAMSAAGFREAGHR̄FFGR̄TALV̄HTDARV̄LEV̄DDPHD

B 5 1  
IPARGGSKGIPGKNLLTVGGV̄P̄L̄VCRSIRAALASNGVGRV̄V̄S̄T̄DDEIAAAAAETEGAEV̄IR̄R̄PAEIAAGDTASSES̄ALL̄HAEL  
VFLQCTSP̄FTTGAQIDANSS̄FSV̄R̄QDLEET̄GAIYAMAITĀFRRC̄GSR̄FCP̄TSPV̄VL̄QEV̄GPEIDTPED

B 5 4  
IPARGGSKGILR̄KN̄L̄REV̄GḠĀP̄LVVHTIRQALESS̄SVDR̄V̄V̄S̄T̄DDEIR̄DVSQAAGAHV̄HR̄P̄VDISGDTISSEAVIHHALV̄  
VFLQATAPLRAKGDIDGDS̄L̄SV̄R̄QDLEENGSIYV̄FKP̄W̄L̄ERYDN̄RLGḠRIALYEMT̄SAAFDIDDEID

B 5 7  
IPARGGSKGLKYKN̄IYPVAḠK̄P̄LLAWTIEQARASQFVDK̄V̄V̄S̄T̄DSEDIADIAKEYGAEV̄IERPADIAGDKATSESAILHAHV̄  
VFLQATSPLRKQGDIDGDS̄L̄SV̄R̄QDR̄PEN̄GSIYMF̄TPETL̄HR̄FN̄RIGEK̄LVAYEMEWQTWEIDTLNE

E U A e d e s  
ILARGGSRGIPLKNLAKLDDRTLLSRALHTALSTDG FHSVWVSTEDDRIAQAVERHDVVRVHLRPPPEVAQDHTSSIESVREF  
NVALVQCTSPFLGVRYLDEDCVFSVRQDWD EAGMFYFARRKLL-LEGRFQNNNCEVVVIDRDSLEIDSLYD  
B r a n c h i o  
ILARGGSKGIPMKNNKKLGGLELIGWVIRAIDSIMDSVWVSTDHDDIAATARKCGAQVHRRSAEVSQDTCNSWVTIDEF  
IIVDIQATSPCLHPFHLDHDSVFTVRQEWNENGA FYMMTRDVE-QQGLMQGGK MAYLVME EYGVDIDTDL D  
B r a n c h i o 2  
VLARGGSKGIPLKNIKPLAGTPLVGWVLR A AIDSEAFDSVWVSTDHDEIAAVSREFGAQVHRRSPEVSRDASTSLETIQEFI  
FGNVQATAPCVHPFHLRKDSLFAVRQDWDENGSFYFCTTALV-QKGLLQGGKVGYLEMAEYSVDIDIDID  
S t r o n g y l o  
ILARGGSKGIKLKNIKALAGQPLIAWVLR A AIDSGEFDSVWVSTDHADIARISKEWGAQVHMRS PHTARDQATSIEAMQEF  
FVANVQCTSPCLHPSHLQRDSVFAVRQDWAENGSFYFATRELL-MAGLFQGGKVG YCEM QEYSVDIDT D I D  
E U M u s  
VLARGGSKGIPLKNIKRLAGVPLIGWVLR AALDAGVFQSVWVSTDHDEIENVAKQFGAQVHRRSSETS KDSSTSLDAIVEF  
IVGNIQATSPCLHPTDLQKDSVFSVRQDWDENGSFYFAKRHLI-EMGYLQGGKMAYYEMREHSVDIDVDID  
E U P o n g o  
ILARGGSKGIPLKNIKHLAGVPLIGWVLR AALDSGAFQSVWVSTDHDEIENVAKQFGAQVHRRSSEVSKDSSTSLDAIIEFI  
VGNIQATSPCLHPTDLQKDSVFSVRQDWDENGSFYFAKRHLI-EMGYLQGGKMAYYEMREHSVDIDVDID  
B r a n c h i o 3  
ADYCGGSKGIPMKNIKMLGDLELIGWIRASLDS DIMDSVWVSTDHDDIAAVASRCGAQVHRRSSQVSHDKCNSWTAIDE  
FIIVHIQATPCVHPFHQEDSVFSVRQEWPENGA FYMFTRDVE-QQGV LQGGRMGCLVMDEYSIDIDT D Q D  
E U C i o n a  
ILARGGSKGIPMKNIVNVGGLPLICWVLR AAVDSNAFDSI WVSTDSDEVAEVASSYEVKIHRRSDEVSKDNTSSMESTQEF  
AIGLLQATTPCIQPSQLLSDSVFSVRQDWAENGGFYFAKTSV V-RQGLFQGGRTGYQEMPEHSVDIDTPFD  
B 4 7  
IPARGGSKGLPGKNIKNLCKGKPLIAWSIEAAKRAKKIDRFIVST DSEEIAAVAREWGCPVLKRPDELATDETKTISVLSQINFIL  
LQPTSPIRDVGLIDESNLATGRQDYKDDGNVYILSKKLV-SEGLWFGDHICRHVISRQNFEIDDEID  
B 1 6  
IPARGGSKRIPRKNIKIFCGQP MIAWSIQAALNSACFDRI VVSTDDAEIAEVARELGAEVFIRPHVLADDHTGTL PVIRHAQV  
CCYATAPFITTKDILQTYAFTASQDLEDAGQFYWGKVDSW MQELPFFT VNSCPVLLPHRVQDIDTVED  
B 3 1  
MIAWSIEAAIESGCFDKVMVSTDDAEIAAVARKY GADVFMRPVELADDHAGTLPVIRQAQVCCYATAPFVRPEDLYQAYAF  
SVSQDLEDAGQFYWGRSEAWLKEIPIFAGNAVPILLPHRVQDIDTPED  
B 4 1  
IPARGGSKGLPRKNIKIFNKKPLIYWPINAALNSKYIDEV VVTTDDVEIADIKNFGAYIFIRPKDLAGDLSTTEETLQHAIAIFM  
TCTDVFRKPEWIDDES VFSGRQIREEDTG IICASRAYLWRNGRRIGDKVDIILNDF TGLDIHSEED  
B r a n c h i o 4  
VLARGGSKGIPMKNIKMLGGTPLIGWVLR AAVYAEVFD SIWVSTDNERIANVARDYGAQVHYRSEEVSKDTTSSWETVGE  
FIIANIQATSPCVHPFHQEDSVFTIRQDYDENGAYMYTRDIH-AQGKTQGGRIAWLEMGEYSVDIYTDL D  
B 5 5  
VLARSSSKRIKKNIIIDFFNKPLMAYPIEVALNSKLF EKVFISDSMEYVNLAKNYGASFNL RPKILADDRATTLEVMAYHIAC  
CLYGASALLQEKLKNDYVFTCTQDLKDAGLLYMGKAQAFKEMRPIFSQNSIALELSLEVQDIAHFRR  
B 2 8  
IPARGGSKGIPRKNIRLLNGKPLISYAIEVAKKSNLIDKVVVSTDDIEIGNIAKKYGAEVIMRPDHISSDEVPLDPVIHYTIVTV  
QPTSPLLSIFTLENDTVLTGRQYLPESGAVFATKRKCI-TPNNRMGENITIVVGEESIDIDSYTD  
B 5 0  
LPAKGNSERVASKNTRLLDGKPLFLHTLEKLLQLGDDYEVYLDSECPEIFKMASHLEGFKLIRDPALATNATDGNKFLNEVI  
AQHLCTSPFIENNTIKNDSSFLVSADIEETMG L YVCSREAALD TERRIGRNPCLIEAKLEAVDVNYEED  
O s t r o u 1  
VPCKGTSSRVESKNTKLLDSKPLFLHTLEKLL ECPFDKVVLDSESDVFKVAEFLASDNLKRDEALATNKTDGNTLFMNEI  
YVQALCTSPFIHPETIKKDSACTVSV DLPETMGLYNITRDAAKLTRRRIGNKPHMLHVTEEAVDINYEVD
